# Supplementary material
Source: publisher figshare collection journal article supplement (https://acs.figshare.com/ndownloader/files/21005763)
Supplement: Supplementary file 1 [file 21005763]

## Sheet: EXP1_protein_pivot
									Table S4. Experiment 1 Gene Ontology Terms
PG.ProteinDescriptions	PG.ProteinGroups	PG.UniProtIds	PG.UniProtIds	Subcellular location [CC]	Gene ontology (cellular component)	Extracellular space	Cytoplasm	Membrane	Nucleus	2101_XPM	2101C_XUM	2101F_FPS	2101SB_DPS	2101SC_DUS	2102_XPM	2102C_XUM	2102F_FPS	2102SB_DPS	2102SC_DUS	2103_XPM	2103C_XUM	2103F_FPS	2103SB_DPS	2103SC_DUS	2106_XPM	2106C_XUM	2106F_FPS	2106SB_DPS	2106SC_DUS	2114_XPM	2114C_XUM	2114F_FPS	2114SB_DPS	2114SC_DUS
immunoglobulin lambda variable 8-61 [OS=Homo sapiens]	A0A075B6I0	A0A075B6I0	A0A075B6I0	SUBCELLULAR LOCATION: Secreted {ECO:0000303|PubMed:20176268, ECO:0000303|PubMed:22158414}. Cell membrane {ECO:0000303|PubMed:20176268, ECO:0000303|PubMed:22158414}.	extracellular space [GO:0005615]; plasma membrane [GO:0005886]	1		3		Filtered	Filtered	Filtered	8271.79	6962.65	Filtered	Filtered	Filtered	Filtered	7059.09	Filtered	6940.74	Filtered	9845.53	8119.11	Filtered	Filtered	Filtered	5212.2	6854.96	25971.7	46563.6	22670.8	30378	25493.5
Immunoglobulin lambda variable 7-46 [OS=Homo sapiens];Immunoglobulin lambda variable 7-43 [OS=Homo sapiens]	A0A075B6I9;P04211	A0A075B6I9;P04211	A0A075B6I9	SUBCELLULAR LOCATION: Secreted {ECO:0000303|PubMed:20176268, ECO:0000303|PubMed:22158414}. Cell membrane {ECO:0000303|PubMed:20176268, ECO:0000303|PubMed:22158414}.	extracellular space [GO:0005615]; plasma membrane [GO:0005886]	1		3		Filtered	1301.91	Filtered	3333.07	Filtered	Filtered	5031.52	3640.31	Filtered	4721.31	4091.82	3942.02	1111.46	6295.34	5255.93	Filtered	6655.92	Filtered	4088.97	Filtered	63993	41292.2	40353.1	24773.4	20259.3
immunoglobulin lambda variable 3-16 [OS=Homo sapiens];Immunoglobulin lambda variable 3-25 [OS=Homo sapiens];immunoglobulin lambda variable 3-27 [OS=Homo sapiens]	A0A075B6K0;P01717;P01718	A0A075B6K0;P01717;P01718	A0A075B6K0	SUBCELLULAR LOCATION: Secreted {ECO:0000303|PubMed:20176268, ECO:0000303|PubMed:22158414}. Cell membrane {ECO:0000303|PubMed:20176268, ECO:0000303|PubMed:22158414}.	extracellular space [GO:0005615]; plasma membrane [GO:0005886]	1		3		Filtered	11958.6	4271.28	5566.78	8924.67	11687.3	11071.9	3465.27	5697.09	5652.06	13668	7910.99	4179.9	9125.51	6567.19	11118.5	7632.6	4619.14	7133.48	8184.15	50041.5	46619.2	19914.8	20768.9	19554.1
immunoglobulin lambda variable 3-10 [OS=Homo sapiens];Immunoglobulin lambda variable 3-1 [OS=Homo sapiens]	A0A075B6K4;P01715	A0A075B6K4;P01715	A0A075B6K4	SUBCELLULAR LOCATION: Secreted {ECO:0000303|PubMed:20176268, ECO:0000303|PubMed:22158414}. Cell membrane {ECO:0000303|PubMed:20176268, ECO:0000303|PubMed:22158414}.	extracellular space [GO:0005615]; plasma membrane [GO:0005886]	1		3		10674.1	8542.51	5905.28	8405.28	10140.2	Filtered	11738	4188.79	8675.48	9178.14	Filtered	8764.52	4971.33	14409.4	8702.97	Filtered	10064.9	5840.7	10417.4	8916.86	Filtered	92958.2	35874.9	37574.6	31299.4
immunoglobulin kappa variable 3D-11 [OS=Homo sapiens];Immunoglobulin kappa variable 3-11 [OS=Homo sapiens]	A0A0A0MRZ8;P04433	A0A0A0MRZ8;P04433	A0A0A0MRZ8	SUBCELLULAR LOCATION: Secreted {ECO:0000303|PubMed:20176268, ECO:0000303|PubMed:22158414}. Cell membrane {ECO:0000303|PubMed:20176268, ECO:0000303|PubMed:22158414}.	extracellular space [GO:0005615]; plasma membrane [GO:0005886]	1		3		77139.5	130408	64898.8	146727	156059	190552	175031	57901.1	129968	157161	268158	115174	54061.3	200786	165423	201308	160150	62116.7	176879	135696	1.4324e+06	1.19805e+06	323083	621076	549821
immunoglobulin heavy variable 3-49 [OS=Homo sapiens]	A0A0A0MS15	A0A0A0MS15	A0A0A0MS15	SUBCELLULAR LOCATION: Secreted {ECO:0000303|PubMed:20176268, ECO:0000303|PubMed:22158414}. Cell membrane {ECO:0000303|PubMed:20176268, ECO:0000303|PubMed:22158414}.	external side of plasma membrane [GO:0009897]; immunoglobulin complex, circulating [GO:0042571]			3		Filtered	Filtered	Filtered	Filtered	Filtered	Filtered	Filtered	Filtered	Filtered	Filtered	Filtered	Filtered	Filtered	Filtered	Filtered	Filtered	Filtered	Filtered	Filtered	Filtered	Filtered	Filtered	631.677	1165.33	762.757
immunoglobulin heavy variable 3-72 [OS=Homo sapiens]	A0A0B4J1Y9	A0A0B4J1Y9	A0A0B4J1Y9	SUBCELLULAR LOCATION: Secreted {ECO:0000303|PubMed:20176268, ECO:0000303|PubMed:22158414}. Cell membrane {ECO:0000303|PubMed:20176268, ECO:0000303|PubMed:22158414}.	external side of plasma membrane [GO:0009897]; immunoglobulin complex, circulating [GO:0042571]			3		Filtered	Filtered	Filtered	318307	Filtered	Filtered	Filtered	Filtered	184597	131124	Filtered	79243.4	21033.6	254460	172432	Filtered	Filtered	22226.1	259685	Filtered	Filtered	481614	110098	836531	510668
Immunoglobulin heavy variable 1-3 [OS=Homo sapiens]	A0A0C4DH29	A0A0C4DH29	A0A0C4DH29	SUBCELLULAR LOCATION: Secreted {ECO:0000303|PubMed:20176268, ECO:0000303|PubMed:22158414}. Cell membrane {ECO:0000303|PubMed:20176268, ECO:0000303|PubMed:22158414}.	external side of plasma membrane [GO:0009897]; immunoglobulin complex, circulating [GO:0042571]			3		Filtered	Filtered	Filtered	33984	Filtered	Filtered	Filtered	Filtered	Filtered	Filtered	Filtered	Filtered	Filtered	Filtered	Filtered	Filtered	Filtered	Filtered	Filtered	Filtered	113210	Filtered	12957.6	76935.6	44627.6
Immunoglobulin heavy variable 1-18 [OS=Homo sapiens]	A0A0C4DH31	A0A0C4DH31	A0A0C4DH31	SUBCELLULAR LOCATION: Secreted {ECO:0000303|PubMed:20176268, ECO:0000303|PubMed:22158414}. Cell membrane {ECO:0000303|PubMed:20176268, ECO:0000303|PubMed:22158414}.	external side of plasma membrane [GO:0009897]; immunoglobulin complex, circulating [GO:0042571]			3		13984.5	11716.7	5816.18	315218	177470	Filtered	Filtered	Filtered	182721	131464	Filtered	76441.4	21033.6	253360	172399	104534	Filtered	Filtered	258801	179665	286742	473388	21264.8	356020	510598
immunoglobulin heavy variable 4-28 [OS=Homo sapiens]	A0A0C4DH34	A0A0C4DH34	A0A0C4DH34	SUBCELLULAR LOCATION: Secreted {ECO:0000303|PubMed:20176268, ECO:0000303|PubMed:22158414}. Cell membrane {ECO:0000303|PubMed:20176268, ECO:0000303|PubMed:22158414}.	external side of plasma membrane [GO:0009897]; immunoglobulin complex, circulating [GO:0042571]			3		Filtered	2716.28	5503.34	5359.89	4676.09	Filtered	2414.61	1726.16	4387.64	5426.81	Filtered	2984.03	2305.89	7316.49	6845.35	Filtered	Filtered	2572.54	6153.71	3728.37	38891.6	39097.6	16273.7	32082	14093.6
immunoglobulin heavy variable 4-61 [OS=Homo sapiens];immunoglobulin heavy variable 4-39 [OS=Homo sapiens];Immunoglobulin heavy variable 4-59 [OS=Homo sapiens];immunoglobulin heavy variable 4-34 [OS=Homo sapiens];Immunoglobulin heavy variable 4-30-4 [OS=Homo sapiens];Immunoglobulin heavy variable 4-38-2 [OS=Homo sapiens]	A0A0C4DH41;P01824;P01825;P06331;P0DP06;P0DP08	A0A0C4DH41;P01824;P01825;P06331;P0DP06;P0DP08	A0A0C4DH41	SUBCELLULAR LOCATION: Secreted {ECO:0000303|PubMed:20176268, ECO:0000303|PubMed:22158414}. Cell membrane {ECO:0000303|PubMed:20176268, ECO:0000303|PubMed:22158414}.	external side of plasma membrane [GO:0009897]; immunoglobulin complex, circulating [GO:0042571]			3		Filtered	5563.75	9353.18	6666.56	8489.23	Filtered	11015.7	3211	Filtered	7008.02	Filtered	5346.69	3640.1	4685.5	6021.3	Filtered	7548.73	5051.62	4621.43	6291.89	41234.7	73622.4	29642.4	36583.6	30394.7
immunoglobulin kappa variable 1-8 [OS=Homo sapiens];immunoglobulin kappa variable 1-9 [OS=Homo sapiens]	A0A0C4DH67;A0A0C4DH69	A0A0C4DH67;A0A0C4DH69	A0A0C4DH67	SUBCELLULAR LOCATION: Secreted {ECO:0000303|PubMed:20176268, ECO:0000303|PubMed:22158414}. Cell membrane {ECO:0000303|PubMed:20176268, ECO:0000303|PubMed:22158414}.	extracellular space [GO:0005615]; plasma membrane [GO:0005886]	1		3		9079.17	Filtered	5295.18	Filtered	5378.51	Filtered	Filtered	Filtered	Filtered	6957.27	Filtered	8357.62	Filtered	11075.2	6639.25	10671.7	13253.6	2431.02	Filtered	7155.95	54192.8	51941.6	9183.99	22878.8	19367.8
immunoglobulin kappa variable 2-24 [OS=Homo sapiens]	A0A0C4DH68	A0A0C4DH68	A0A0C4DH68	SUBCELLULAR LOCATION: Secreted {ECO:0000303|PubMed:20176268, ECO:0000303|PubMed:22158414}. Cell membrane {ECO:0000303|PubMed:20176268, ECO:0000303|PubMed:22158414}.	extracellular space [GO:0005615]; plasma membrane [GO:0005886]	1		3		25183.6	43738.9	21644.4	34681.9	39075.6	69527.6	49589.7	19882.2	31900.5	40357.5	61413.7	33286.6	19601.1	46828.4	41706.9	32647	43920	19127.4	37381.9	32480.4	129026	214828	76413.8	106631	81578.5
immunoglobulin kappa variable 1-6 [OS=Homo sapiens];Immunoglobulin kappa variable 1-12 [OS=Homo sapiens];immunoglobulin kappa variable 1D-12 [OS=Homo sapiens];Immunoglobulin kappa variable 1D-39 [OS=Homo sapiens]	A0A0C4DH72;A0A0C4DH73;P01611;P04432	A0A0C4DH72;A0A0C4DH73;P01611;P04432	A0A0C4DH72	SUBCELLULAR LOCATION: Secreted {ECO:0000303|PubMed:20176268, ECO:0000303|PubMed:22158414}. Cell membrane {ECO:0000303|PubMed:20176268, ECO:0000303|PubMed:22158414}.	extracellular space [GO:0005615]; plasma membrane [GO:0005886]	1		3		43882	36165.7	22370	44058.5	36921	50510	67868.5	27879.9	41807.6	37351.1	58040.1	37037.8	25781.2	53466.8	33614.4	55413.2	63930.5	34136.4	45547.4	30447.3	87753.8	74995.3	38211.7	44722.5	48137.5
RNA-binding protein 47 [OS=Homo sapiens];Isoform 2 of RNA-binding protein 47 [OS=Homo sapiens]	A0AV96;A0AV96-2	A0AV96;A0AV96-2	A0AV96	SUBCELLULAR LOCATION: Nucleus {ECO:0000250}.	nucleus [GO:0005634]				4	2556.78	Filtered	11934.1	5792.42	10950.3	Filtered	Filtered	4393.55	9795.23	10974.9	Filtered	6208.05	4363.61	5316.99	7150.93	Filtered	Filtered	4214.74	5394.46	9179.71	6853.5	Filtered	7383.87	11480.9	10824.6
Ubiquitin-like modifier-activating enzyme 6 [OS=Homo sapiens]	A0AVT1-1	A0AVT1-1	A0AVT1	0	cytoplasm [GO:0005737]; cytosol [GO:0005829]		2			7154.68	5826.44	11436.6	9771.02	11572.7	Filtered	6706.89	13823.6	7287.94	19243.7	1616.83	7145.58	12287	8711.28	10514.4	7702.97	5264.39	14109.8	9068.17	9609.97	Filtered	12235.7	13942.2	11365.3	10401.5
Isoform 2 of Extended synaptotagmin-2 [OS=Homo sapiens]	A0FGR8-2	A0FGR8-2	A0FGR8	SUBCELLULAR LOCATION: Cell membrane {ECO:0000269|PubMed:17360437, ECO:0000269|PubMed:20833364, ECO:0000269|PubMed:23791178, ECO:0000269|PubMed:29469807}; Peripheral membrane protein {ECO:0000269|PubMed:17360437}. Endoplasmic reticulum membrane {ECO:0000269|PubMed:23791178, ECO:0000269|PubMed:29469807}; Multi-pass membrane protein {ECO:0000255}. Note=Localizes to endoplasmic reticulum-plasma membr…	endoplasmic reticulum membrane [GO:0005789]; endoplasmic reticulum-plasma membrane contact site [GO:0140268]; extrinsic component of cytoplasmic side of plasma membrane [GO:0031234]; integral component of plasma membrane [GO:0005887]; intrinsic component of endoplasmic reticulum membrane [GO:0031227]; membrane [GO:0016020]; organelle membrane contact site [GO:0044232]		2	3		Filtered	3720.76	7001.01	6336.26	8822.36	Filtered	8667.81	7145.98	6057.16	4920.54	Filtered	5355.72	6902.4	3120.85	6453.33	Filtered	6183.72	6606.38	5885.62	7283.82	Filtered	5949.99	9689.28	7367.86	5622.19
Shootin-1 [OS=Homo sapiens];Isoform 3 of Shootin-1 [OS=Homo sapiens];Isoform 4 of Shootin-1 [OS=Homo sapiens]	A0MZ66;A0MZ66-3;A0MZ66-4	A0MZ66;A0MZ66-3;A0MZ66-4	A0MZ66	SUBCELLULAR LOCATION: Perikaryon {ECO:0000250|UniProtKB:Q8K2Q9}. Cell projection, axon {ECO:0000250|UniProtKB:Q8K2Q9}. Cell projection, growth cone {ECO:0000250|UniProtKB:Q8K2Q9}. Cytoplasm, cytoskeleton {ECO:0000250|UniProtKB:Q8K2Q9}. Cell projection, filopodium {ECO:0000250|UniProtKB:A0MZ67}. Cell projection, lamellipodium {ECO:0000250|UniProtKB:A0MZ67}. Note=Localizes in multiple growth cones …	axon [GO:0030424]; axonal growth cone [GO:0044295]; cell leading edge [GO:0031252]; cytoplasm [GO:0005737]; filopodium [GO:0030175]; growth cone [GO:0030426]; lamellipodium [GO:0030027]; microtubule [GO:0005874]; microtubule associated complex [GO:0005875]; microtubule cytoskeleton [GO:0015630]; perikaryon [GO:0043204]; perinuclear region of cytoplasm [GO:0048471]		2		4	9427.84	9190.35	18269.1	17421	22297.6	16591	14068.2	16991.2	17616.8	20447.7	25148.5	14268.6	17800.9	14890	23506.2	17403.6	13390.3	17139.9	18076.6	17426.3	14629.6	14400.1	12039.2	10281	12887.2
Transmembrane protein 82 [OS=Homo sapiens]	A0PJX8	A0PJX8	A0PJX8	SUBCELLULAR LOCATION: Membrane {ECO:0000305}; Multi-pass membrane protein {ECO:0000305}.	integral component of membrane [GO:0016021]			3		1564.84	6066.6	10743.9	2689.87	2541.55	Filtered	5603.9	7796.64	3268.56	2769.03	Filtered	5090.76	7351.14	2493.08	2476.18	2327.86	4018.23	6431.07	Filtered	2840.02	Filtered	Filtered	6347.89	2465.81	1734.24
Acetolactate synthase-like protein [OS=Homo sapiens]	A1L0T0	A1L0T0	A1L0T0	SUBCELLULAR LOCATION: Membrane; Single-pass membrane protein.	integral component of membrane [GO:0016021]; membrane [GO:0016020]			3		24147.9	9200.81	11751.5	16378.2	12323.5	29156.9	13302	13247.4	17811.8	12597.4	26300.6	12670	14144.4	14138	14176.5	26923.3	12004.2	13917	16717	14244.6	32824.7	27470.1	18225.2	26320.9	23198.4
neuroblastoma-amplified sequence [OS=Homo sapiens];Isoform 2 of Neuroblastoma-amplified sequence [OS=Homo sapiens]	A2RRP1-1;A2RRP1-2	A2RRP1-1;A2RRP1-2	A2RRP1	SUBCELLULAR LOCATION: Cytoplasm {ECO:0000269|PubMed:20577004}. Endoplasmic reticulum {ECO:0000269|PubMed:19369418}. Endoplasmic reticulum membrane; Peripheral membrane protein {ECO:0000305}.	cytosol [GO:0005829]; Dsl1/NZR complex [GO:0070939]; endoplasmic reticulum [GO:0005783]; endoplasmic reticulum membrane [GO:0005789]; membrane [GO:0016020]		2	3		Filtered	4085.72	5480.25	4733.41	6145.25	13131.3	5939.9	5496.21	2722.91	6144.57	Filtered	7207.92	5177.03	3223.89	6331.02	Filtered	4701.64	5763	4790.96	5851.88	Filtered	Filtered	4765.69	4021.41	4218.16
fucose mutarotase [OS=Homo sapiens];Isoform 2 of Fucose mutarotase [OS=Homo sapiens]	A2VDF0;A2VDF0-2	A2VDF0;A2VDF0-2	A2VDF0	0	cytosol [GO:0005829]		2			78893.5	27599.2	8515.07	10534.6	10007.6	34349.9	47837.8	7349.71	8939.5	9019.01	72566.5	11472.8	7047.44	15640.6	6632.53	42465.3	11078.9	8423.69	8819.14	7894.87	132489	24241.2	7246.53	11801.1	7053.95
von Willebrand factor A domain-containing protein 8 [OS=Homo sapiens];Isoform 3 of von Willebrand factor A domain-containing protein 8 [OS=Homo sapiens]	A3KMH1;A3KMH1-3	A3KMH1;A3KMH1-3	A3KMH1	SUBCELLULAR LOCATION: Isoform 1: Mitochondrion {ECO:0000269|PubMed:30204880}.; SUBCELLULAR LOCATION: Isoform 2: Mitochondrion {ECO:0000269|PubMed:30204880}. Peroxisome {ECO:0000269|PubMed:30204880}. Note=Localizes to peroxisomes in a PEX7-dependent manner. {ECO:0000269|PubMed:30204880}.	mitochondrion [GO:0005739]; peroxisome [GO:0005777]					1.17805e+06	163.007	17012.9	269847	321720	25827.4	657850	24116.6	179471	212735	973117	286984	22675.8	800184	213572	472854	Filtered	15980.3	665913	310525	841849	1.39118e+06	29887.2	325216	200876
WD repeat-containing protein 91 [OS=Homo sapiens];Isoform 2 of WD repeat-containing protein 91 [OS=Homo sapiens]	A4D1P6-1;A4D1P6-2	A4D1P6-1;A4D1P6-2	A4D1P6	SUBCELLULAR LOCATION: Early endosome membrane {ECO:0000269|PubMed:26783301}; Peripheral membrane protein {ECO:0000269|PubMed:26783301}. Late endosome membrane {ECO:0000269|PubMed:26783301, ECO:0000269|PubMed:28404643}.	cytosol [GO:0005829]; early endosome membrane [GO:0031901]; extrinsic component of endosome membrane [GO:0031313]; late endosome membrane [GO:0031902]		2	3		Filtered	Filtered	Filtered	11292.2	7142.73	23097.8	Filtered	Filtered	Filtered	8646.23	Filtered	4847.47	3789.36	Filtered	7173.9	28538.7	Filtered	Filtered	Filtered	10963.2	18753	12274.7	3495.08	12596	13067
CCR4-NOT transcription complex subunit 1 [OS=Homo sapiens];Isoform 2 of CCR4-NOT transcription complex subunit 1 [OS=Homo sapiens]	A5YKK6;A5YKK6-2	A5YKK6;A5YKK6-2	A5YKK6	SUBCELLULAR LOCATION: Cytoplasm, P-body {ECO:0000269|PubMed:21976065}. Nucleus {ECO:0000305|PubMed:21976065}. Note=NANOS2 promotes its localization to P-body. {ECO:0000250}.	CCR4-NOT complex [GO:0030014]; CCR4-NOT core complex [GO:0030015]; cytosol [GO:0005829]; extracellular space [GO:0005615]; membrane [GO:0016020]; nucleus [GO:0005634]; P-body [GO:0000932]; peroxisomal membrane [GO:0005778]	1	2	3	4	9203.52	4544.89	7011.65	6093.52	8433.21	7178.44	3651.65	6567.58	4132.64	10132.1	5825.21	3140.44	5349.7	3601.62	7982.18	10910.8	4815.04	6396.83	7367.22	9736.9	7804.43	4079.31	6687.5	8060.67	6756.79
Microtubule-associated proteins 1A/1B light chain 3 beta 2 [OS=Homo sapiens];Microtubule-associated proteins 1A/1B light chain 3B [OS=Homo sapiens]	A6NCE7;Q9GZQ8	A6NCE7;Q9GZQ8	A6NCE7	SUBCELLULAR LOCATION: Cytoplasm, cytoskeleton {ECO:0000250}. Endomembrane system {ECO:0000250}; Lipid-anchor {ECO:0000250}. Cytoplasmic vesicle, autophagosome membrane {ECO:0000250}; Lipid-anchor {ECO:0000250}. Note=LC3-II binds to the autophagic membranes. {ECO:0000250}.	autophagosome membrane [GO:0000421]; cytoplasmic vesicle [GO:0031410]; cytosol [GO:0005829]; endomembrane system [GO:0012505]; microtubule [GO:0005874]		2	3		1473.75	3348.21	1919.23	Filtered	Filtered	Filtered	3791.6	1656.64	Filtered	Filtered	2597.98	2678.09	Filtered	1442.62	Filtered	Filtered	4029.25	Filtered	1819.4	Filtered	7002.51	Filtered	4483.82	2342.87	3432.79
Uncharacterized protein C2orf72 [OS=Homo sapiens]	A6NCS6	A6NCS6	A6NCS6	0	0					59965.4	13445.4	26747.7	35313.7	35826.7	88631.9	22716.3	19588.1	46350	30447.4	55417.6	18793.6	19281.6	45952.9	70127.9	32864.5	15402.4	14630.8	56594.5	40555.8	79182.5	11434.1	14139.4	29278.5	36463.6
putative L-aspartate dehydrogenase [OS=Homo sapiens]	A6ND91-1	A6ND91-1	A6ND91	0	0					178229	104052	42870.9	74323.2	72755.5	112551	123142	48956.3	83737.6	73311.2	246296	101926	54592.5	124014	68563.2	142263	101761	55195.6	71489	72014.1	210334	135689	49330.3	60564.2	59469.9
Paralemmin-3 [OS=Homo sapiens]	A6NDB9	A6NDB9	A6NDB9	SUBCELLULAR LOCATION: Cytoplasm {ECO:0000250}. Cell membrane {ECO:0000250}; Lipid-anchor {ECO:0000250}.	cytoplasm [GO:0005737]; plasma membrane [GO:0005886]		2	3		18485.1	15312.2	36709.5	28384.7	33335.9	29400.1	22170.5	33617.4	22670	30440.5	16232	26682.4	34832.9	15196.9	33393.4	12663.7	16773.8	36132.1	23813.9	29524.8	Filtered	18516.6	23080.3	11042.5	26098.9
glycerol-3-phosphate phosphatase [OS=Homo sapiens]	A6NDG6	A6NDG6	A6NDG6	0	cytoplasm [GO:0005737]		2			Filtered	8979.75	Filtered	Filtered	Filtered	Filtered	Filtered	Filtered	Filtered	Filtered	Filtered	Filtered	Filtered	Filtered	Filtered	Filtered	Filtered	Filtered	Filtered	Filtered	Filtered	Filtered	Filtered	Filtered	Filtered
Tubulin alpha chain-like 3 [OS=Homo sapiens];Isoform 2 of Tubulin alpha chain-like 3 [OS=Homo sapiens]	A6NHL2-1;A6NHL2-2	A6NHL2-1;A6NHL2-2	A6NHL2	SUBCELLULAR LOCATION: Cytoplasm, cytoskeleton {ECO:0000250}.	cytoplasm [GO:0005737]; microtubule [GO:0005874]		2			Filtered	15586.5	18025.8	Filtered	Filtered	Filtered	22145.3	14676.7	Filtered	Filtered	Filtered	20637.4	13067.9	Filtered	Filtered	Filtered	13172.4	15946.3	Filtered	Filtered	Filtered	18984.2	17356.1	Filtered	Filtered
Tetratricopeptide repeat protein 36 [OS=Homo sapiens]	A6NLP5	A6NLP5	A6NLP5	0	0					44413.6	47919.5	25635.9	44332	44046.7	98990.4	55890.7	29591.6	38093.7	32940.6	81110.5	39342.5	31056.4	29766.9	45828.6	53916.8	27628.5	31349.7	42877.3	44085.6	47636	19694.5	16016.5	28417.7	18451.5
Collagen alpha-6(VI) chain [OS=Homo sapiens]	A6NMZ7-1	A6NMZ7-1	A6NMZ7	SUBCELLULAR LOCATION: Secreted, extracellular space, extracellular matrix {ECO:0000250}. Note=Deposed in the extracellular matrix of skeletal muscle. {ECO:0000250}.	collagen-containing extracellular matrix [GO:0062023]; collagen trimer [GO:0005581]; extracellular matrix [GO:0031012]; extracellular region [GO:0005576]					Filtered	5068.12	5270.64	Filtered	6278.62	Filtered	Filtered	9539.58	9585.85	6077.72	Filtered	Filtered	9049.8	9687.16	13928.7	Filtered	3011.64	9108.15	2498.58	3134.28	Filtered	Filtered	1466.56	Filtered	Filtered
Isoform 2 of Golgi pH regulator A [OS=Homo sapiens];Isoform 3 of Golgi pH regulator A [OS=Homo sapiens];Golgi pH regulator B [OS=Homo sapiens]	B7ZAQ6-2;B7ZAQ6-3;P0CG08	B7ZAQ6-2;B7ZAQ6-3;P0CG08	B7ZAQ6	SUBCELLULAR LOCATION: Golgi apparatus membrane {ECO:0000250}; Multi-pass membrane protein {ECO:0000250}.	Golgi-associated vesicle membrane [GO:0030660]; Golgi cisterna membrane [GO:0032580]; integral component of membrane [GO:0016021]			3		Filtered	Filtered	4030.75	Filtered	Filtered	Filtered	Filtered	3576.45	Filtered	Filtered	Filtered	4737.32	3832.45	19146.3	Filtered	Filtered	2534.89	3275.22	4149.35	2025.41	8655.58	Filtered	4092.57	Filtered	Filtered
Nascent polypeptide-associated complex subunit alpha, muscle-specific form [OS=Homo sapiens];Isoform 2 of Nascent polypeptide-associated complex subunit alpha, muscle-specific form [OS=Homo sapiens];Nascent polypeptide-associated complex subunit alpha [OS=Homo sapiens]	E9PAV3;E9PAV3-2;Q13765-1	E9PAV3;E9PAV3-2;Q13765-1	E9PAV3	SUBCELLULAR LOCATION: Cytoplasm {ECO:0000250|UniProtKB:P70670}. Nucleus {ECO:0000250|UniProtKB:P70670}.	nascent polypeptide-associated complex [GO:0005854]; nucleus [GO:0005634]				4	53815.5	40534	34033.8	24948.2	27401.3	49703.5	83341.7	36684	38084.2	37602.7	50946.9	43002	35472.1	49012.1	36009.2	53387	53695.4	42851.9	35597.4	30802.3	62443.5	77078.5	37663.8	33287.7	31406.8
Alkyldihydroxyacetonephosphate synthase, peroxisomal [OS=Homo sapiens]	O00116	O00116	O00116	SUBCELLULAR LOCATION: Peroxisome membrane. Note=Localized to the inner aspect of the peroxisomal membrane.	cytosol [GO:0005829]; membrane [GO:0016020]; mitochondrion [GO:0005739]; nucleolus [GO:0005730]; peroxisomal matrix [GO:0005782]; peroxisomal membrane [GO:0005778]; peroxisome [GO:0005777]		2	3	4	9386.9	8768.51	13027.5	14433.8	15778.5	21169.3	19977.3	12605.9	11507.7	12926.6	30255.9	14439.5	13463.5	9392.42	11654.7	12543.4	7691.45	13806.2	12586.9	14655.8	11219.8	12987.8	12343	8696.93	8515.81
thymidine kinase 2, mitochondrial [OS=Homo sapiens];Isoform 2 of Thymidine kinase 2, mitochondrial [OS=Homo sapiens];Isoform 3 of Thymidine kinase 2, mitochondrial [OS=Homo sapiens];Isoform 6 of Thymidine kinase 2, mitochondrial [OS=Homo sapiens]	O00142;O00142-2;O00142-3;O00142-6	O00142;O00142-2;O00142-3;O00142-6	O00142	SUBCELLULAR LOCATION: Mitochondrion.	cytoplasm [GO:0005737]; mitochondrial matrix [GO:0005759]; mitochondrion [GO:0005739]		2			3666.87	14996.3	16363.2	16449.2	15195.9	Filtered	27561.4	13762.1	11020.6	16943.3	Filtered	31165.4	16094.5	11443	11890.6	4353.54	23948.9	15235.4	13313.2	9440.58	Filtered	22536.7	17791.1	10855.3	14505.5
PDZ and LIM domain protein 1 [OS=Homo sapiens]	O00151	O00151	O00151	SUBCELLULAR LOCATION: Cytoplasm {ECO:0000269|PubMed:10861853, ECO:0000269|PubMed:11110697}. Cytoplasm, cytoskeleton {ECO:0000269|PubMed:10861853, ECO:0000269|PubMed:11110697}. Cytoplasm, myofibril, sarcomere, Z line {ECO:0000269|PubMed:10861853}. Note=Associates with actin stress fibers. {ECO:0000269|PubMed:11110697}.	cell-cell adherens junction [GO:0005913]; cytoskeleton [GO:0005856]; focal adhesion [GO:0005925]; transcription factor complex [GO:0005667]; Z disc [GO:0030018]					31247.5	41723.9	49417.5	46497.1	50578.6	71286	47364.9	47815	39722.7	41825	40468.6	45164	50084.9	30529.5	41532	50873.5	26911.7	48765.3	41137.8	45972.1	24253.2	37705.3	24890.1	27704.3	20677.9
cytosolic acyl coenzyme A thioester hydrolase [OS=Homo sapiens];Isoform 2 of Cytosolic acyl coenzyme A thioester hydrolase [OS=Homo sapiens];Isoform 3 of Cytosolic acyl coenzyme A thioester hydrolase [OS=Homo sapiens];Isoform 4 of Cytosolic acyl coenzyme A thioester hydrolase [OS=Homo sapiens];Isoform 5 of Cytosolic acyl coenzyme A thioester hydrolase [OS=Homo sapiens];Isoform 6 of Cytosolic acyl…	O00154;O00154-2;O00154-3;O00154-4;O00154-5;O00154-6;O00154-7	O00154;O00154-2;O00154-3;O00154-4;O00154-5;O00154-6;O00154-7	O00154	SUBCELLULAR LOCATION: Isoform 4: Cytoplasm, cytosol {ECO:0000305|PubMed:12435388}.; SUBCELLULAR LOCATION: Isoform 6: Cytoplasm, cytosol {ECO:0000305|PubMed:12435388}.; SUBCELLULAR LOCATION: Isoform 1: Mitochondrion {ECO:0000269|PubMed:12435388}.; SUBCELLULAR LOCATION: Isoform 5: Mitochondrion {ECO:0000269|PubMed:12435388}.	cytosol [GO:0005829]; extracellular exosome [GO:0070062]; mitochondrion [GO:0005739]; nucleoplasm [GO:0005654]		2		4	Filtered	Filtered	Filtered	14828.1	Filtered	Filtered	Filtered	11139.9	13691.4	17015.9	33350.4	14868.4	11398.2	16582.7	Filtered	19934	Filtered	14111	16370.7	19990.9	Filtered	Filtered	11121.9	12968.1	10577.4
Isoform 2 of Unconventional myosin-Ic [OS=Homo sapiens]	O00159-2	O00159-2	O00159	SUBCELLULAR LOCATION: Isoform 1: Cytoplasm {ECO:0000269|PubMed:22736583}. Nucleus {ECO:0000269|PubMed:22736583}. Note=Colocalizes with RNA polymerase II. Absent from nucleoli and does not colocalize with RNA polymerase I. Translocates to nuclear speckles upon exposure to inhibitors of RNA polymerase II transcription.; SUBCELLULAR LOCATION: Isoform 2: Cytoplasm. Cell membrane {ECO:0000250}; Periph…	basal plasma membrane [GO:0009925]; brush border [GO:0005903]; cytoplasm [GO:0005737]; cytoplasmic vesicle membrane [GO:0030659]; cytosol [GO:0005829]; extracellular exosome [GO:0070062]; filamentous actin [GO:0031941]; lateral plasma membrane [GO:0016328]; membrane [GO:0016020]; membrane raft [GO:0045121]; microvillus [GO:0005902]; nuclear body [GO:0016604]; nuclear pore [GO:0005643]; nucleolus …		2	3	4	22477.8	20408.2	39428.5	34415.4	55385.5	34507.4	25619.4	39455.9	29880.6	48323.8	15740.8	27181.2	41589.2	23722.5	55241.7	29495.2	21141.6	38689.2	32433	46842.7	30447.3	28903.6	51534.5	55143.1	57039.5
Unconventional myosin-If [OS=Homo sapiens]	O00160	O00160	O00160	0	unconventional myosin complex [GO:0016461]					8304.05	6411.26	11896.2	7434.48	9264.93	8816.18	7684.97	6972.45	6248.93	9770.91	Filtered	3385.77	6832.56	6709.85	8085.95	Filtered	3959.74	7253.27	6883.99	8859.79	Filtered	7899.29	9446.14	7917.66	8615.2
Synaptosomal-associated protein 23 [OS=Homo sapiens]	O00161	O00161	O00161	SUBCELLULAR LOCATION: Cell membrane; Peripheral membrane protein. Cell membrane; Lipid-anchor. Cell junction, synapse, synaptosome. Note=Mainly localized to the plasma membrane.	azurophil granule [GO:0042582]; cell-cell adherens junction [GO:0005913]; cytoplasm [GO:0005737]; extracellular exosome [GO:0070062]; focal adhesion [GO:0005925]; mast cell granule [GO:0042629]; neuron projection [GO:0043005]; nucleoplasm [GO:0005654]; phagocytic vesicle membrane [GO:0030670]; plasma membrane [GO:0005886]; presynapse [GO:0098793]; SNARE complex [GO:0031201]; specific granule [GO:…		2	3	4	12156.3	12460.2	9298.3	6554.58	8892.72	13189.2	14362.1	8358.69	6271.26	7165.21	7932.79	9855.84	8395.45	7949.17	5821.88	12522.7	12281.6	9122.93	4944.66	8186.75	10369.3	13726.3	8353.06	5750.27	6050.67
HCLS1-associated protein X-1 [OS=Homo sapiens];Isoform 2 of HCLS1-associated protein X-1 [OS=Homo sapiens];Isoform 3 of HCLS1-associated protein X-1 [OS=Homo sapiens];Isoform 5 of HCLS1-associated protein X-1 [OS=Homo sapiens]	O00165;O00165-2;O00165-3;O00165-5	O00165;O00165-2;O00165-3;O00165-5	O00165	SUBCELLULAR LOCATION: Mitochondrion {ECO:0000269|PubMed:18971376, ECO:0000269|PubMed:9058808}. Endoplasmic reticulum {ECO:0000269|PubMed:18971376, ECO:0000269|PubMed:9058808}. Nucleus membrane {ECO:0000269|PubMed:9058808}. Cytoplasmic vesicle {ECO:0000250|UniProtKB:O35387}. Cytoplasm, cell cortex {ECO:0000269|PubMed:26997484}. Cell membrane {ECO:0000269|PubMed:26997484}; Peripheral membrane prote…	actin cytoskeleton [GO:0015629]; cell cortex [GO:0005938]; cytoplasmic vesicle [GO:0031410]; endoplasmic reticulum [GO:0005783]; lamellipodium [GO:0030027]; mitochondrial intermembrane space [GO:0005758]; mitochondrial outer membrane [GO:0005741]; mitochondrion [GO:0005739]; nuclear envelope [GO:0005635]; nuclear membrane [GO:0031965]; P-body [GO:0000932]; plasma membrane [GO:0005886]; sarcoplasm…		2	3	4	Filtered	Filtered	Filtered	739.778	587.502	Filtered	Filtered	1265.57	645.931	902.602	Filtered	Filtered	783.149	639.497	783.338	Filtered	580.014	Filtered	583.235	529.195	Filtered	Filtered	585.057	544.662	610.749
Phospholemman [OS=Homo sapiens]	O00168	O00168	O00168	SUBCELLULAR LOCATION: Cell membrane, sarcolemma {ECO:0000250|UniProtKB:P56513}; Single-pass type I membrane protein {ECO:0000255}. Apical cell membrane {ECO:0000250|UniProtKB:O08589}; Single-pass type I membrane protein {ECO:0000255}. Membrane, caveola {ECO:0000250|UniProtKB:O08589}. Cell membrane, sarcolemma, T-tubule {ECO:0000250|UniProtKB:O08589}. Note=Detected in the apical cell membrane in b…	apical plasma membrane [GO:0016324]; caveola [GO:0005901]; integral component of plasma membrane [GO:0005887]; intercalated disc [GO:0014704]; plasma membrane [GO:0005886]; sarcolemma [GO:0042383]; sodium:potassium-exchanging ATPase complex [GO:0005890]; T-tubule [GO:0030315]			3		69283.8	49057.4	37495.2	67493.4	87602.3	56735.4	76822.9	40423.8	64014.6	64027.2	8194.46	61335.1	46685	60767.4	80433	15061	47485.3	44057.8	60335.4	57529.8	21489.5	93143	37199.5	48397.7	60629.5
AH receptor-interacting protein [OS=Homo sapiens]	O00170	O00170	O00170	SUBCELLULAR LOCATION: Cytoplasm.	aryl hydrocarbon receptor complex [GO:0034751]; cytoplasm [GO:0005737]; cytosol [GO:0005829]; membrane [GO:0016020]; nucleoplasm [GO:0005654]		2	3	4	16591	13594.5	25334.2	9397.82	20373.4	22181.6	9977.02	12429	11785.6	11898.7	16261	13046.2	10692.7	9647.2	10660.6	34024.4	1938.71	11246.4	8236.59	11155.7	42192.8	17335.5	19274.1	15448.3	15653.9
syntaxin-binding protein 3 [OS=Homo sapiens]	O00186	O00186	O00186	SUBCELLULAR LOCATION: Cytoplasm, cytosol {ECO:0000269|PubMed:10194441}. Cell membrane {ECO:0000269|PubMed:10194441}. Note=In platelets, predominantly cytosolic. Low amounts membrane-associated.	apical plasma membrane [GO:0016324]; basolateral plasma membrane [GO:0016323]; cytosol [GO:0005829]; extracellular exosome [GO:0070062]; phagocytic vesicle [GO:0045335]; plasma membrane [GO:0005886]; platelet alpha granule [GO:0031091]; presynapse [GO:0098793]; specific granule [GO:0042581]; tertiary granule [GO:0070820]		2	3		9208.99	5965.13	12803.8	10551.3	10894.7	21793.6	7201.07	12272.6	8388.03	10470.1	14065.8	8234.23	12314.9	6423.1	11040.1	13841	9148.35	12819.9	9527.13	10376.9	24324.9	13588.5	15759.7	11330.1	12498.5
armadillo repeat protein deleted in velo-cardio-facial syndrome [OS=Homo sapiens];Isoform Short of Armadillo repeat protein deleted in velo-cardio-facial syndrome [OS=Homo sapiens]	O00192;O00192-2	O00192;O00192-2	O00192	0	cell-cell adherens junction [GO:0005913]; cell-cell junction [GO:0005911]; cytoplasm [GO:0005737]; intracellular [GO:0005622]; nucleus [GO:0005634]; plasma membrane [GO:0005886]		2	3	4	Filtered	Filtered	8076.95	1142.31	2299.48	Filtered	Filtered	5928.07	Filtered	2112.04	Filtered	1677.98	5744.67	Filtered	2303.5	Filtered	599.576	4602.03	898.273	2727.19	Filtered	Filtered	6894.48	2852.05	4206.51
Small acidic protein [OS=Homo sapiens]	O00193	O00193	O00193	0	0					Filtered	1169.5	974.51	601.601	Filtered	Filtered	4482.93	2575.56	461.729	Filtered	Filtered	2115.59	3121.56	1058.11	Filtered	Filtered	2308.76	3487.1	Filtered	Filtered	Filtered	Filtered	2582.38	Filtered	Filtered
AP-3 complex subunit beta-1 [OS=Homo sapiens];Isoform 2 of AP-3 complex subunit beta-1 [OS=Homo sapiens]	O00203-1;O00203-3	O00203-1;O00203-3	O00203	SUBCELLULAR LOCATION: Cytoplasmic vesicle, clathrin-coated vesicle membrane {ECO:0000250}; Peripheral membrane protein {ECO:0000250}; Cytoplasmic side {ECO:0000250}. Golgi apparatus {ECO:0000250}. Note=Component of the coat surrounding the cytoplasmic face of coated vesicles located at the Golgi complex. {ECO:0000250}.	AP-3 adaptor complex [GO:0030123]; axon cytoplasm [GO:1904115]; clathrin adaptor complex [GO:0030131]; clathrin-coated vesicle membrane [GO:0030665]; Golgi apparatus [GO:0005794]; lysosomal membrane [GO:0005765]; membrane [GO:0016020]; synapse [GO:0045202]		2	3		111746	109414	69816.8	157666	116798	241757	166912	90252	142817	129616	337310	100668	86123.3	165238	124652	213694	120773	89648.6	165134	129394	208535	93168.6	63151.2	95499.2	70653.3
NADH dehydrogenase [ubiquinone] iron-sulfur protein 8, mitochondrial [OS=Homo sapiens]	O00217	O00217	O00217	SUBCELLULAR LOCATION: Mitochondrion {ECO:0000305}.	mitochondrial matrix [GO:0005759]; mitochondrial respiratory chain complex I [GO:0005747]; mitochondrion [GO:0005739]					11506.8	22418	18826.8	30822.3	31376.8	40048.6	43535.5	24150.3	30672.7	30465.8	58784.7	30868.8	22762.1	35318.2	32172	34892.2	24300.2	26342.4	29409.5	26588.2	18470.5	39802.2	20587.8	29714.2	26563.5
26S proteasome non-ATPase regulatory subunit 11 [OS=Homo sapiens];Isoform 2 of 26S proteasome non-ATPase regulatory subunit 11 [OS=Homo sapiens]	O00231;O00231-2	O00231;O00231-2	O00231	SUBCELLULAR LOCATION: Nucleus {ECO:0000250}. Cytoplasm, cytosol {ECO:0000250}.	cytosol [GO:0005829]; extracellular region [GO:0005576]; ficolin-1-rich granule lumen [GO:1904813]; membrane [GO:0016020]; nucleoplasm [GO:0005654]; nucleus [GO:0005634]; proteasome accessory complex [GO:0022624]; proteasome complex [GO:0000502]; proteasome regulatory particle, lid subcomplex [GO:0008541]; secretory granule lumen [GO:0034774]		2	3	4	16627.6	16575.8	26836.3	18429.6	21514	27692.4	25569.9	26530.6	13746.9	20526	13637.2	20744	25698.6	13984.2	20818	18293.3	19736.2	27502.1	14133.7	21558.2	25621.5	24823.9	26326.1	15827.6	19059.9
26s proteasome non-atpase regulatory subunit 12 [OS=Homo sapiens]	O00232-1	O00232-1	O00232	0	cytoplasm [GO:0005737]; cytosol [GO:0005829]; extracellular exosome [GO:0070062]; extracellular region [GO:0005576]; ficolin-1-rich granule lumen [GO:1904813]; membrane [GO:0016020]; nuclear proteasome complex [GO:0031595]; nucleoplasm [GO:0005654]; proteasome accessory complex [GO:0022624]; proteasome complex [GO:0000502]; proteasome regulatory particle [GO:0005838]; proteasome regulatory partic…		2	3	4	25102.1	23402.4	46551	36322.6	38658.1	35507.1	25843.3	39627.5	32744.5	38138.3	19874.2	29789.6	41459.5	24849	42108.5	25199.2	25852.8	39954.3	33546.3	38195.7	27993.2	24854.8	44805.2	33584.2	31584.5
26S proteasome non-ATPase regulatory subunit 9 [OS=Homo sapiens]	O00233-1	O00233-1	O00233	0	cytoplasm [GO:0005737]; cytosol [GO:0005829]; nucleoplasm [GO:0005654]; nucleus [GO:0005634]; proteasome regulatory particle [GO:0005838]; proteasome regulatory particle, base subcomplex [GO:0008540]		2		4	19689.2	27645.4	33526.4	26066.9	28146.5	22907.2	17292.4	18658.1	26161.1	22372.8	8376.96	18354.7	18910.2	21234.2	25301.8	5626.89	17901.9	17451.9	26780.2	24468.4	14025.3	18363.6	20495.8	30672	24152.5
Copper transport protein ATOX1 [OS=Homo sapiens]	O00244	O00244	O00244	0	cytosol [GO:0005829]		2			10741.2	8954.36	4821.49	14493.2	9406.51	10575.8	14351.5	6740.54	12882.1	8731.68	28752.3	8828.1	6836.46	12510.9	7345.26	2888.33	6105.52	10101.2	11293.5	7746.07	Filtered	8922.03	8197.42	11383.6	6565.61
Membrane-associated progesterone receptor component 1 [OS=Homo sapiens]	O00264	O00264	O00264	SUBCELLULAR LOCATION: Microsome membrane {ECO:0000250|UniProtKB:Q95250}; Single-pass membrane protein {ECO:0000255}. Smooth endoplasmic reticulum membrane {ECO:0000303|PubMed:28396637}; Single-pass membrane protein {ECO:0000255}.	cell body [GO:0044297]; endoplasmic reticulum [GO:0005783]; integral component of plasma membrane [GO:0005887]; membrane [GO:0016020]; neuronal cell body [GO:0043025]; neuron projection [GO:0043005]; plasma membrane [GO:0005886]; smooth endoplasmic reticulum membrane [GO:0030868]; specific granule membrane [GO:0035579]; synapse [GO:0045202]			3		401051	285828	293843	430486	442186	578503	344327	286259	419404	392043	490719	315408	256411	378436	459775	389360	282221	272054	399197	353854	373861	251988	125902	252327	248398
Huntingtin-interacting protein 1 [OS=Homo sapiens];Isoform 3 of Huntingtin-interacting protein 1 [OS=Homo sapiens];Isoform 4 of Huntingtin-interacting protein 1 [OS=Homo sapiens]	O00291;O00291-3;O00291-4	O00291;O00291-3;O00291-4	O00291	SUBCELLULAR LOCATION: Cytoplasm. Nucleus. Endomembrane system. Cytoplasmic vesicle, clathrin-coated vesicle membrane. Note=Shuttles between cytoplasm and nucleus. Nuclear translocation can be induced by AR.	actin cortical patch [GO:0030479]; clathrin-coated vesicle [GO:0030136]; clathrin-coated vesicle membrane [GO:0030665]; cytoplasm [GO:0005737]; cytoskeleton [GO:0005856]; cytosol [GO:0005829]; extrinsic component of cytoplasmic side of plasma membrane [GO:0031234]; extrinsic component of postsynaptic membrane [GO:0098890]; extrinsic component of presynaptic membrane [GO:0098888]; glutamatergic sy…		2	3	4	Filtered	Filtered	Filtered	Filtered	Filtered	Filtered	Filtered	1188.49	Filtered	Filtered	Filtered	Filtered	2379.8	Filtered	Filtered	Filtered	Filtered	Filtered	Filtered	Filtered	Filtered	Filtered	Filtered	Filtered	Filtered
chloride intracellular channel protein 1 [OS=Homo sapiens]	O00299	O00299	O00299	SUBCELLULAR LOCATION: Nucleus {ECO:0000269|PubMed:12681486, ECO:0000269|PubMed:9139710}. Nucleus membrane {ECO:0000269|PubMed:9139710}; Single-pass membrane protein {ECO:0000255}. Cytoplasm {ECO:0000269|PubMed:10793131, ECO:0000269|PubMed:11551966, ECO:0000269|PubMed:12681486, ECO:0000269|PubMed:9139710, ECO:0000305|PubMed:11978800, ECO:0000305|PubMed:14613939}. Cell membrane {ECO:0000269|PubMed:…	blood microparticle [GO:0072562]; brush border [GO:0005903]; chloride channel complex [GO:0034707]; cytoplasm [GO:0005737]; extracellular exosome [GO:0070062]; extracellular space [GO:0005615]; membrane [GO:0016020]; mitochondrion [GO:0005739]; nuclear envelope [GO:0005635]; nuclear membrane [GO:0031965]; nucleus [GO:0005634]; perinuclear region of cytoplasm [GO:0048471]; plasma membrane [GO:0005…	1	2	3	4	69933.5	44867.5	52665.2	61850	70248.3	81067.3	67763.3	49285.9	52628.1	65468.9	75608.4	47058.9	45159.1	68016	64295.6	88998.2	50847.6	46233	59627.4	58641.5	151612	94311	67260.3	79020.2	57208.7
Eukaryotic translation initiation factor 3 subunit F [OS=Homo sapiens]	O00303	O00303	O00303	SUBCELLULAR LOCATION: Cytoplasm {ECO:0000255|HAMAP-Rule:MF_03005}.	cytosol [GO:0005829]; eukaryotic 43S preinitiation complex [GO:0016282]; eukaryotic 48S preinitiation complex [GO:0033290]; eukaryotic translation initiation factor 3 complex [GO:0005852]; eukaryotic translation initiation factor 3 complex, eIF3m [GO:0071541]; membrane [GO:0016020]		2	3		35394.2	32234.7	31332.2	26997.9	21628.6	29943.3	44517.6	30607.9	25174.4	22198.4	45490.5	32260.4	30483.5	26272.7	19980.5	51096.2	35456.2	28943.8	24994.1	23976.1	54052.6	57707.9	29523.5	25126.9	20089.2
Pyruvate dehydrogenase protein X component, mitochondrial [OS=Homo sapiens];Isoform 3 of Pyruvate dehydrogenase protein X component, mitochondrial [OS=Homo sapiens]	O00330-1;O00330-3	O00330-1;O00330-3	O00330	SUBCELLULAR LOCATION: Mitochondrion matrix.	mitochondrial matrix [GO:0005759]; pyruvate dehydrogenase complex [GO:0045254]					6160.13	3570.46	6016.94	3085.78	3160.94	39791.8	7098.74	4958.09	2595.45	2498.88	13248.7	6168.49	4873.31	3873.41	3555.42	16080.7	4201.36	4936.26	3060.16	2674.77	25771.5	6585.5	4772.08	5942.03	5609.85
Sulfhydryl oxidase 1 [OS=Homo sapiens];Isoform 2 of Sulfhydryl oxidase 1 [OS=Homo sapiens]	O00391;O00391-2	O00391;O00391-2	O00391	SUBCELLULAR LOCATION: Isoform 1: Golgi apparatus membrane {ECO:0000269|PubMed:17331072, ECO:0000269|PubMed:23704371}; Single-pass membrane protein {ECO:0000305|PubMed:17331072}. Secreted {ECO:0000269|PubMed:29757379}. Note=A small proportion is secreted, probably via a proteolytic cleavage that removes the membrane anchor. {ECO:0000305|PubMed:29757379}.; SUBCELLULAR LOCATION: Isoform 2: Secreted …	endoplasmic reticulum lumen [GO:0005788]; extracellular exosome [GO:0070062]; extracellular region [GO:0005576]; extracellular space [GO:0005615]; Golgi apparatus [GO:0005794]; integral component of Golgi membrane [GO:0030173]; intercellular bridge [GO:0045171]; intracellular membrane-bounded organelle [GO:0043231]; platelet alpha granule lumen [GO:0031093]; specific granule lumen [GO:0035580]; t…	1		3		Filtered	Filtered	1137.12	Filtered	Filtered	Filtered	Filtered	932.192	Filtered	787.391	Filtered	Filtered	899.383	Filtered	Filtered	Filtered	1922.64	1417.67	790.307	Filtered	Filtered	Filtered	3160.26	1547.57	1471.05
Acetyl-coenzyme A transporter 1 [OS=Homo sapiens]	O00400	O00400	O00400	SUBCELLULAR LOCATION: Endoplasmic reticulum membrane {ECO:0000305|PubMed:9096318}; Multi-pass membrane protein {ECO:0000305|PubMed:9096318}.	endoplasmic reticulum membrane [GO:0005789]; Golgi membrane [GO:0000139]; integral component of plasma membrane [GO:0005887]; membrane [GO:0016020]			3		3327.48	5582.13	8884.3	Filtered	Filtered	Filtered	20539.4	5643.91	9172.31	9921.16	Filtered	11697.8	5986.28	315.45	1105.71	13217.2	5817.85	10237.9	2342.25	2450.47	Filtered	15158.7	7080.25	2080.78	1813.96
Neural Wiskott-Aldrich syndrome protein [OS=Homo sapiens]	O00401	O00401	O00401	SUBCELLULAR LOCATION: Cytoplasm, cytoskeleton {ECO:0000269|PubMed:9422512}. Nucleus {ECO:0000269|PubMed:16767080}. Cytoplasm {ECO:0000250|UniProtKB:Q91YD9}. Note=Preferentially localized in the cytoplasm when phosphorylated and in the nucleus when unphosphorylated (By similarity). Exported from the nucleus by an nuclear export signal (NES)-dependent mechanism to the cytoplasm (By similarity). {EC…	actin cap [GO:0030478]; actin cortical patch [GO:0030479]; actin cytoskeleton [GO:0015629]; actin filament [GO:0005884]; cytoplasmic vesicle [GO:0031410]; cytosol [GO:0005829]; endocytic vesicle membrane [GO:0030666]; extracellular exosome [GO:0070062]; lamellipodium [GO:0030027]; nucleus [GO:0005634]; plasma membrane [GO:0005886]		2	3	4	13521.7	32601.7	4282.92	Filtered	Filtered	Filtered	27258.7	10479.9	1796.26	1212.94	Filtered	19839.1	Filtered	Filtered	894.761	Filtered	655.159	6041.25	796.328	765.918	Filtered	29825.1	3526.16	Filtered	1079.11
Importin-5 [OS=Homo sapiens];Isoform 3 of Importin-5 [OS=Homo sapiens]	O00410;O00410-3	O00410;O00410-3	O00410	SUBCELLULAR LOCATION: Cytoplasm. Nucleus. Nucleus, nucleolus. Note=Nucleus; nuclear rim. Found particularly in the nuclear rim and nucleolus.	cytoplasm [GO:0005737]; membrane [GO:0016020]; nuclear membrane [GO:0031965]; nuclear periphery [GO:0034399]; nuclear pore [GO:0005643]; nucleolus [GO:0005730]; nucleus [GO:0005634]		2	3	4	15982.2	6500.81	19480.6	15481.5	14769.9	22209.9	10322.5	10516.1	12702.4	9140.97	12912.6	10802.3	11402.7	10760.1	13406.1	16887.7	9129.06	11601.7	13982.6	13597.9	21185.2	14843.2	14014	16609.3	9026.18
Histone deacetylase complex subunit SAP18 [OS=Homo sapiens]	O00422	O00422	O00422	SUBCELLULAR LOCATION: Nucleus {ECO:0000269|PubMed:16314458}. Cytoplasm {ECO:0000269|PubMed:16314458}. Nucleus speckle {ECO:0000269|PubMed:20966198}. Note=Shuttles between the nucleus and the cytoplasm (PubMed:16314458). Colocalizes with ACIN1 and SRSF2 in nuclear speckles (PubMed:20966198). {ECO:0000269|PubMed:16314458, ECO:0000269|PubMed:20966198}.	ASAP complex [GO:0061574]; cytosol [GO:0005829]; histone deacetylase complex [GO:0000118]; nuclear body [GO:0016604]; nuclear speck [GO:0016607]; nucleoplasm [GO:0005654]		2		4	Filtered	793.559	1399.01	Filtered	Filtered	Filtered	Filtered	1312.54	Filtered	411.863	Filtered	Filtered	1402.58	Filtered	Filtered	Filtered	847.837	968.285	Filtered	323.238	Filtered	Filtered	836.379	318.635	Filtered
Dynamin-1-like protein [OS=Homo sapiens];Isoform 4 of Dynamin-1-like protein [OS=Homo sapiens];Isoform 2 of Dynamin-1-like protein [OS=Homo sapiens];Isoform 3 of Dynamin-1-like protein [OS=Homo sapiens];Isoform 5 of Dynamin-1-like protein [OS=Homo sapiens];Isoform 6 of Dynamin-1-like protein [OS=Homo sapiens];Isoform 8 of Dynamin-1-like protein [OS=Homo sapiens]	O00429;O00429-2;O00429-3;O00429-4;O00429-5;O00429-6;O00429-8	O00429;O00429-2;O00429-3;O00429-4;O00429-5;O00429-6;O00429-8	O00429	SUBCELLULAR LOCATION: Cytoplasm, cytosol. Golgi apparatus. Endomembrane system; Peripheral membrane protein. Mitochondrion outer membrane {ECO:0000269|PubMed:26122121, ECO:0000269|PubMed:27145208, ECO:0000269|PubMed:28969390}; Peripheral membrane protein. Peroxisome. Membrane, clathrin-coated pit {ECO:0000250}. Cytoplasmic vesicle, secretory vesicle, synaptic vesicle membrane {ECO:0000250}. Note=…	brush border [GO:0005903]; cell junction [GO:0030054]; clathrin-coated pit [GO:0005905]; cytoplasm [GO:0005737]; cytosol [GO:0005829]; endoplasmic reticulum [GO:0005783]; endoplasmic reticulum membrane [GO:0005789]; Golgi apparatus [GO:0005794]; Golgi membrane [GO:0000139]; intracellular membrane-bounded organelle [GO:0043231]; membrane [GO:0016020]; microtubule [GO:0005874]; mitochondrial membra…		2	3	4	40369.2	14827.3	7443.47	21049.8	36410.1	37363.5	23539.1	11772.8	28390.3	35545.5	30506.8	27472.6	16456.4	34042.7	32662.2	39120.6	7713.34	17944.3	26868.8	23185.2	37828.2	30277.8	16257.7	29994.7	30204.4
RNA 3'-terminal phosphate cyclase [OS=Homo sapiens];Isoform 2 of RNA 3'-terminal phosphate cyclase [OS=Homo sapiens]	O00442;O00442-2	O00442;O00442-2	O00442	SUBCELLULAR LOCATION: Nucleus, nucleoplasm.	nucleoplasm [GO:0005654]; nucleus [GO:0005634]				4	18300.5	26222.3	31805.1	9949.94	16338.4	16359.5	25249.8	18474.3	12243.9	17420.1	17649.5	14941.2	25836.3	1057.76	16088.3	14597.4	23647.8	23624	11495.7	15335.6	23576.1	Filtered	17843.5	14466.9	14972.5
Phosphatidylinositol 3-kinase regulatory subunit beta [OS=Homo sapiens]	O00459	O00459	O00459	0	cytosol [GO:0005829]; nucleus [GO:0005634]; phosphatidylinositol 3-kinase complex [GO:0005942]		2		4	35591.5	22778.2	25775	45125.6	14597.4	Filtered	61482.4	25501.6	14838.3	28251.2	122792	28089.9	31557	45967.3	35301.2	95080	20661.8	29891	41401.4	36442.1	214482	55548.9	24022.5	30115.6	28957
Golgi integral membrane protein 4 [OS=Homo sapiens]	O00461	O00461	O00461	SUBCELLULAR LOCATION: Golgi apparatus, Golgi stack membrane; Single-pass type II membrane protein. Endosome membrane; Single-pass type II membrane protein. Membrane {ECO:0000305}; Lipid-anchor {ECO:0000305}. Note=Localizes to cis and medial Golgi cisternae. Probably cycles between early Golgi and distal compartments like endosome.	cis-Golgi network [GO:0005801]; endocytic vesicle [GO:0030139]; endosome membrane [GO:0010008]; Golgi apparatus [GO:0005794]; Golgi cisterna membrane [GO:0032580]; Golgi lumen [GO:0005796]; Golgi membrane [GO:0000139]; integral component of membrane [GO:0016021]; membrane [GO:0016020]; transport vesicle [GO:0030133]			3		6756.44	6819.93	8113.45	8550.42	9776.83	23454.1	13395.6	9666.3	8645.49	9410.86	3966.72	11844.5	11117.5	8084.49	9398.37	26792.1	10822.4	10792.2	13157.9	9393.46	2964.7	22407.9	11698.1	8903.06	9834.57
Agrin [OS=Homo sapiens];Isoform 2 of Agrin [OS=Homo sapiens];Isoform 3 of Agrin [OS=Homo sapiens];Isoform 4 of Agrin [OS=Homo sapiens];Isoform 5 of Agrin [OS=Homo sapiens];Isoform 6 of Agrin [OS=Homo sapiens];Isoform 7 of Agrin [OS=Homo sapiens]	O00468;O00468-2;O00468-3;O00468-4;O00468-5;O00468-6;O00468-7	O00468;O00468-2;O00468-3;O00468-4;O00468-5;O00468-6;O00468-7	O00468	SUBCELLULAR LOCATION: Isoform 1: Secreted, extracellular space, extracellular matrix {ECO:0000269|PubMed:20551380}. Note=Synaptic basal lamina at the neuromuscular junction. {ECO:0000250|UniProtKB:P31696}.; SUBCELLULAR LOCATION: Isoform 2: Cell junction, synapse {ECO:0000250|UniProtKB:A2ASQ1}. Cell membrane {ECO:0000250|UniProtKB:A2ASQ1}; Single-pass type II membrane protein {ECO:0000250|UniProtK…	basement membrane [GO:0005604]; cell junction [GO:0030054]; collagen-containing extracellular matrix [GO:0062023]; cytosol [GO:0005829]; extracellular exosome [GO:0070062]; extracellular region [GO:0005576]; Golgi lumen [GO:0005796]; integral component of membrane [GO:0016021]; lysosomal lumen [GO:0043202]; plasma membrane [GO:0005886]; synapse [GO:0045202]		2	3		9711.3	6750.68	12090.1	4566.1	11801.1	6456.35	9706.96	9433.11	5303.39	10127.2	9970.45	7595.13	8720.49	4375.4	8896.19	8412.5	5363.97	9645.64	5850.58	8815.61	10009.1	12336.5	19573.8	10906.7	11060.1
procollagen-lysine,2-oxoglutarate 5-dioxygenase 2 [OS=Homo sapiens];Isoform 2 of Procollagen-lysine,2-oxoglutarate 5-dioxygenase 2 [OS=Homo sapiens]	O00469-1;O00469-2	O00469-1;O00469-2	O00469	SUBCELLULAR LOCATION: Rough endoplasmic reticulum membrane; Peripheral membrane protein; Lumenal side.	endoplasmic reticulum [GO:0005783]; endoplasmic reticulum membrane [GO:0005789]; extracellular exosome [GO:0070062]; rough endoplasmic reticulum membrane [GO:0030867]			3		Filtered	1384.62	3964.9	6386.94	5736.4	16961.5	Filtered	5202.36	4829.61	6795.09	7660.98	3893.13	4040.71	3214.64	6549.23	Filtered	17194.3	3863.77	5557.47	6790.9	10386.3	20192.9	10358.9	13987.4	12299.6
Exocyst complex component 5 [OS=Homo sapiens]	O00471	O00471	O00471	SUBCELLULAR LOCATION: Cytoplasm {ECO:0000269|PubMed:9119050}. Midbody {ECO:0000269|PubMed:18756269}. Note=Localization at the midbody requires the presence of RALA, EXOC2 and EXOC3. {ECO:0000269|PubMed:18756269}.	cytoplasm [GO:0005737]; cytosol [GO:0005829]; exocyst [GO:0000145]; midbody [GO:0030496]		2			2968.43	Filtered	12818.6	4772.46	6314.31	Filtered	Filtered	13534.1	4497.44	6018.41	Filtered	6820.82	13598.3	2434.87	5735.45	Filtered	Filtered	21055.9	3626.15	7307.26	Filtered	5902.47	11914	5229.2	8412.04
Cytochrome c oxidase subunit NDUFA4 [OS=Homo sapiens]	O00483	O00483	O00483	SUBCELLULAR LOCATION: Mitochondrion inner membrane {ECO:0000269|PubMed:23746447}; Peripheral membrane protein {ECO:0000269|PubMed:23746447}; Matrix side {ECO:0000269|PubMed:23746447}.	mitochondrial inner membrane [GO:0005743]; mitochondrial respiratory chain complex I [GO:0005747]; mitochondrial respiratory chain complex IV [GO:0005751]; mitochondrion [GO:0005739]			3		51148.3	91422.1	95215.2	74065.4	60365.8	72951	115245	105827	74966	53879.3	64521.5	85513.7	152704	74367.1	66324.9	42986.2	57733.3	125263	69480.3	53452	42262.1	73245.1	36072.4	42027.9	25705.4
26S proteasome non-ATPase regulatory subunit 14 [OS=Homo sapiens]	O00487	O00487	O00487	0	cytosol [GO:0005829]; cytosolic proteasome complex [GO:0031597]; extracellular region [GO:0005576]; ficolin-1-rich granule lumen [GO:1904813]; nucleoplasm [GO:0005654]; nucleus [GO:0005634]; proteasome accessory complex [GO:0022624]; proteasome complex [GO:0000502]; proteasome regulatory particle, lid subcomplex [GO:0008541]; secretory granule lumen [GO:0034774]		2		4	38884.1	32383.6	21770.7	19251.8	21959.5	27364.3	12207.3	22155.5	17517.5	21257.2	44830.7	18226	21594.9	16958	18407.2	55998.9	17197.1	19249.2	16804.7	20225.9	55344.2	26378.5	20485.3	17836.5	18856.4
Importin subunit alpha-4 [OS=Homo sapiens]	O00505	O00505	O00505	SUBCELLULAR LOCATION: Cytoplasm {ECO:0000250}. Nucleus {ECO:0000250}.	cytosol [GO:0005829]; host cell [GO:0043657]; nuclear pore [GO:0005643]; nucleoplasm [GO:0005654]		2		4	7349.63	12399	20523.1	5124.34	7856.15	14650.6	11634.6	19584.6	3636.35	7318.44	5784.77	10112.4	18682.4	2833.54	7297.15	12290.3	9032.19	10982.7	4559.32	6764.69	13354.9	13058.2	17680.8	5931.35	6676
serine/threonine-protein kinase 25 [OS=Homo sapiens];Isoform 2 of Serine/threonine-protein kinase 25 [OS=Homo sapiens];Isoform 3 of Serine/threonine-protein kinase 25 [OS=Homo sapiens];serine/threonine-protein kinase 26 [OS=Homo sapiens];Isoform 2 of Serine/threonine-protein kinase 26 [OS=Homo sapiens]	O00506;O00506-2;O00506-3;Q9P289;Q9P289-2	O00506;O00506-2;O00506-3;Q9P289;Q9P289-2	O00506	SUBCELLULAR LOCATION: Cytoplasm {ECO:0000269|PubMed:15037601}. Golgi apparatus {ECO:0000269|PubMed:15037601}. Note=Localizes to the Golgi apparatus.	cytoplasm [GO:0005737]; extracellular exosome [GO:0070062]; Golgi membrane [GO:0000139]		2	3		7978.68	27492.8	21881.6	2830.13	4240.96	2573.95	1602.35	5427.42	2106.64	3896.22	8440	4140.71	5394.72	1473.58	3154.12	4097.11	2972.4	8913.79	6314.24	3985.73	Filtered	816.836	10279	2532.65	2721.17
Ladinin-1 [OS=Homo sapiens]	O00515	O00515	O00515	SUBCELLULAR LOCATION: Secreted, extracellular space, extracellular matrix, basement membrane {ECO:0000250}.	actin cytoskeleton [GO:0015629]; basement membrane [GO:0005604]; extracellular exosome [GO:0070062]			3		8586.93	9172.71	9266.7	10908.8	16016.3	36439	22225.9	8266.97	10191.8	16546.1	15313.1	14196.8	10215.6	10318.8	20056.1	26590.7	6756.93	11513.5	10249.7	13938.3	31815	22073.7	11920.9	20093	19490.3
Fatty-acid amide hydrolase 1 [OS=Homo sapiens]	O00519	O00519	O00519	SUBCELLULAR LOCATION: Endomembrane system {ECO:0000269|PubMed:17015445}; Single-pass membrane protein {ECO:0000269|PubMed:17015445}. Cytoplasm, cytoskeleton {ECO:0000269|PubMed:17015445}. Note=Seems to be attached to intracellular membranes and a portion of the cytoskeletal network.	cytoskeleton [GO:0005856]; endoplasmic reticulum membrane [GO:0005789]; integral component of membrane [GO:0016021]; organelle membrane [GO:0031090]			3		Filtered	Filtered	2686.15	4458.74	Filtered	Filtered	Filtered	2957.25	4087.18	3404.29	Filtered	Filtered	2538.29	Filtered	2741.82	Filtered	Filtered	2201.53	4621.58	4055.52	Filtered	3175.53	3161.17	4945.12	5192.12
Pescadillo homolog [OS=Homo sapiens];Isoform 2 of Pescadillo homolog [OS=Homo sapiens]	O00541-1;O00541-2	O00541-1;O00541-2	O00541	SUBCELLULAR LOCATION: Nucleus, nucleolus. Nucleus, nucleoplasm. Chromosome. Note=Appears to localize to the periphery of metaphase chromosomes during mitosis and to the prenucleolar bodies that form in mitotic cells prior to the actual nucleoli. {ECO:0000255|HAMAP-Rule:MF_03028}.	condensed chromosome [GO:0000793]; cytosol [GO:0005829]; membrane [GO:0016020]; nucleolus [GO:0005730]; nucleoplasm [GO:0005654]; nucleus [GO:0005634]; PeBoW complex [GO:0070545]; preribosome, large subunit precursor [GO:0030687]		2	3	4	16608.5	36086.8	5182.74	Filtered	Filtered	13991.7	Filtered	4130.91	Filtered	Filtered	Filtered	1627.14	4374.62	Filtered	6805.54	69789.6	Filtered	2568.86	Filtered	Filtered	Filtered	Filtered	4653.21	Filtered	Filtered
Isoform 5 of Voltage-dependent P/Q-type calcium channel subunit alpha-1A [OS=Homo sapiens];Isoform 6 of Voltage-dependent P/Q-type calcium channel subunit alpha-1A [OS=Homo sapiens]	O00555-5;O00555-6	O00555-5;O00555-6	O00555	SUBCELLULAR LOCATION: Cell membrane {ECO:0000269|PubMed:10049321, ECO:0000269|PubMed:26716990}; Multi-pass membrane protein {ECO:0000255}.	cell projection [GO:0042995]; cytoplasm [GO:0005737]; integral component of membrane [GO:0016021]; neuronal cell body [GO:0043025]; nucleus [GO:0005634]; plasma membrane [GO:0005886]; voltage-gated calcium channel complex [GO:0005891]		2	3	4	Filtered	57018.1	50433.9	46701.3	65888.6	Filtered	50748	50905.7	36276.8	54977.7	Filtered	26845.2	52747.1	54195.2	61191.2	Filtered	64301.4	67120.6	35742.4	59186.4	Filtered	140813	53409.3	31972.1	47644.6
Syntenin-1 [OS=Homo sapiens];Isoform 3 of Syntenin-1 [OS=Homo sapiens]	O00560-1;O00560-3	O00560-1;O00560-3	O00560	SUBCELLULAR LOCATION: Cell junction, focal adhesion {ECO:0000269|PubMed:11179419}. Cell junction, adherens junction {ECO:0000269|PubMed:11179419}. Cell membrane {ECO:0000269|PubMed:11179419, ECO:0000269|PubMed:25893292, ECO:0000269|PubMed:27386966}; Peripheral membrane protein {ECO:0000269|PubMed:11179419, ECO:0000269|PubMed:27386966}. Endoplasmic reticulum membrane {ECO:0000269|PubMed:17081065};…	adherens junction [GO:0005912]; azurophil granule lumen [GO:0035578]; blood microparticle [GO:0072562]; cytoplasm [GO:0005737]; cytoskeleton [GO:0005856]; cytosol [GO:0005829]; endoplasmic reticulum membrane [GO:0005789]; extracellular exosome [GO:0070062]; extracellular region [GO:0005576]; extracellular space [GO:0005615]; extracellular vesicle [GO:1903561]; focal adhesion [GO:0005925]; interle…	1	2	3	4	Filtered	12571	6749.49	5649.75	9067.93	Filtered	14735.5	6385.3	7016.69	6110.43	Filtered	11816.9	8171.45	7247.96	5330.86	5603.35	16252.6	5344.48	9741.71	8716.86	Filtered	19363	12181.1	9909.09	8993.08
Nucleolar protein 56 [OS=Homo sapiens]	O00567	O00567	O00567	SUBCELLULAR LOCATION: Nucleus, nucleolus {ECO:0000269|PubMed:12429849, ECO:0000269|PubMed:12777385, ECO:0000269|PubMed:9372940}. Cytoplasm {ECO:0000250|UniProtKB:Q9D6Z1}. Nucleus, nucleoplasm {ECO:0000305|PubMed:15574333}.	box C/D snoRNP complex [GO:0031428]; cytoplasm [GO:0005737]; fibrillar center [GO:0001650]; membrane [GO:0016020]; nucleolus [GO:0005730]; nucleoplasm [GO:0005654]; pre-snoRNP complex [GO:0070761]; small nucleolar ribonucleoprotein complex [GO:0005732]; small-subunit processome [GO:0032040]		2	3	4	Filtered	4255.96	13013.7	872.849	2620.81	Filtered	Filtered	7779.44	1152.26	3463.37	Filtered	3600.94	10969.4	2188.12	1693.74	3645.77	Filtered	7703.1	592.53	2749.49	Filtered	Filtered	15548.2	2645.98	2853.74
ATP-dependent RNA helicase DDX3X [OS=Homo sapiens];Isoform 2 of ATP-dependent RNA helicase DDX3X [OS=Homo sapiens]	O00571;O00571-2	O00571;O00571-2	O00571	SUBCELLULAR LOCATION: Nucleus speckle. Cytoplasm. Mitochondrion outer membrane. Note=Located predominantly in nuclear speckles and, at low levels, throughout the cytoplasm. Located to the outer side of nuclear pore complexes (NPC). Shuttles between the nucleus and the cytoplasm in a XPO1 and may be also in a NFX1-dependent manner. Associated with polyadenylated mRNAs in the cytoplasm and the nucl…	cytoplasm [GO:0005737]; cytoplasmic stress granule [GO:0010494]; cytosol [GO:0005829]; extracellular exosome [GO:0070062]; extracellular region [GO:0005576]; ficolin-1-rich granule lumen [GO:1904813]; mitochondrial outer membrane [GO:0005741]; nuclear speck [GO:0016607]; nucleus [GO:0005634]; secretory granule lumen [GO:0034774]		2	3	4	46211.3	23330.9	56823.3	47923.6	65069.4	106563	40340.1	57759	33839.1	53943.1	48603.8	35787.9	55867.4	27604.3	52664	87085.3	26981	52350.1	36671.4	52918.5	76476	27813.8	53465.4	43395.1	53482
Ribonuclease T2 [OS=Homo sapiens]	O00584	O00584	O00584	SUBCELLULAR LOCATION: Secreted. Lysosome lumen. Endoplasmic reticulum lumen. Note=Subcellular fractionation of transfected ovarian cancer cells reveals full-length RNASET2 in the endoplasmic reticulum fraction and the 2 smaller RNASET2 proteolytic products in the lysosome fraction.	azurophil granule lumen [GO:0035578]; endoplasmic reticulum lumen [GO:0005788]; extracellular exosome [GO:0070062]; extracellular region [GO:0005576]; extracellular space [GO:0005615]; lysosomal lumen [GO:0043202]; lysosome [GO:0005764]	1				20006.5	10214.6	4587.86	16028	8769.85	16802.2	20595.7	5816.06	12673.4	6175.04	10251	15078.4	3644.59	17547.9	8621.58	11641.2	7683.79	7263.8	14830.6	8701.8	17304.5	10249.7	5377.44	12980.3	5945.46
Pirin [OS=Homo sapiens]	O00625	O00625	O00625	SUBCELLULAR LOCATION: Nucleus {ECO:0000269|PubMed:20089166, ECO:0000269|PubMed:9079676}. Cytoplasm {ECO:0000269|PubMed:20089166}. Note=Predominantly localized in dot-like subnuclear structures. Cytoplasmic localization of PIR seems to positively correlate with melanoma progression. {ECO:0000269|PubMed:20089166, ECO:0000269|PubMed:9079676}.	cytoplasm [GO:0005737]; cytosol [GO:0005829]; nucleoplasm [GO:0005654]; nucleus [GO:0005634]		2		4	9996.47	8270.84	8288.65	5600.75	7652.13	2536.24	17320.1	5852	5778.29	7931.12	14658.9	9029.59	6493.14	9628.11	5893.91	3614.44	8544.65	6405.21	3577.12	5088.04	8002.94	12636.5	5980.22	7482.25	6765.81
Importin subunit alpha-3 [OS=Homo sapiens]	O00629	O00629	O00629	SUBCELLULAR LOCATION: Cytoplasm {ECO:0000250}. Nucleus {ECO:0000250}.	cytosol [GO:0005829]; nuclear membrane [GO:0031965]; nucleoplasm [GO:0005654]; nucleus [GO:0005634]		2	3	4	Filtered	Filtered	6320.34	768.074	4365.65	Filtered	Filtered	5528.42	437.72	705.842	Filtered	5169.96	2968.22	472.51	636.61	Filtered	722.831	11938.2	551.009	740.104	8008.09	Filtered	2899.56	892.062	848.911
Serine/threonine-protein phosphatase 6 catalytic subunit [OS=Homo sapiens];Isoform 2 of Serine/threonine-protein phosphatase 6 catalytic subunit [OS=Homo sapiens];Isoform 3 of Serine/threonine-protein phosphatase 6 catalytic subunit [OS=Homo sapiens]	O00743;O00743-2;O00743-3	O00743;O00743-2;O00743-3	O00743	SUBCELLULAR LOCATION: Mitochondrion {ECO:0000269|PubMed:29053956}. Cytoplasm {ECO:0000269|PubMed:16769727, ECO:0000269|PubMed:17568194}.	cytosol [GO:0005829]; Golgi membrane [GO:0000139]; mitochondrion [GO:0005739]		2	3		9189.08	13045.1	12460.9	7962.86	10958.3	17322	14151.1	8461.6	7796.81	14393.4	19579.8	13357.5	6120.73	9126.72	12933.3	18334.2	12592.6	8312.01	9133.12	7918.81	22847.9	24263.5	9358.43	9622.33	9225.54
Cocaine esterase [OS=Homo sapiens]	O00748	O00748	O00748	SUBCELLULAR LOCATION: Endoplasmic reticulum lumen {ECO:0000269|PubMed:22446793}.	endoplasmic reticulum [GO:0005783]; endoplasmic reticulum lumen [GO:0005788]; extracellular space [GO:0005615]	1				164575	259064	205068	306832	315093	266908	419930	192760	328199	293918	320462	323417	201030	375464	315306	278781	262643	215570	302887	255580	401088	630959	227525	360425	364747
Lysosomal alpha-mannosidase [OS=Homo sapiens];Isoform 2 of Lysosomal alpha-mannosidase [OS=Homo sapiens]	O00754;O00754-2	O00754;O00754-2	O00754	SUBCELLULAR LOCATION: Lysosome.	azurophil granule lumen [GO:0035578]; extracellular exosome [GO:0070062]; extracellular region [GO:0005576]; extracellular space [GO:0005615]; lysosomal lumen [GO:0043202]; vacuolar membrane [GO:0005774]	1		3		34149.9	12932.3	3677.41	8209.99	5808.83	18068.5	10375.2	7559.06	10078.8	6696.88	25254.6	11309.5	6161.62	14498.8	5596.55	17124.6	4340.24	6215.31	7242.71	5671.04	25469.2	14007.8	6383.98	14330.5	7171.52
fructose-1,6-bisphosphatase isozyme 2 [OS=Homo sapiens]	O00757	O00757	O00757	SUBCELLULAR LOCATION: Cell junction {ECO:0000250}. Cytoplasm. Nucleus. Cytoplasm, myofibril, sarcomere, Z line. Note=In neonatal cardiomyocytes, distributed throughout the cytosol, accumulating in the intercalated disks which occur at the Z line of cardiomyocytes and connect adjacent cells, and also located in the nucleus; dissociates from the Z line following an increase in cytosolic Ca(2+) conc…	cell junction [GO:0030054]; cytoplasm [GO:0005737]; cytosol [GO:0005829]; extracellular exosome [GO:0070062]; nucleoplasm [GO:0005654]; plasma membrane [GO:0005886]; Z disc [GO:0030018]		2	3	4	52553.2	53737	114898	55963.7	47169.5	39507.8	199780	123591	65507.1	41421.9	86481.2	69663.7	59676.3	89764.3	51831.9	47850.1	67943.8	112636	59466.3	43537.9	77975.6	104171	153355	50992.4	36550.4
Acetyl-CoA carboxylase 2 [OS=Homo sapiens];Isoform 3 of Acetyl-CoA carboxylase 2 [OS=Homo sapiens]	O00763;O00763-3	O00763;O00763-3	O00763	SUBCELLULAR LOCATION: Mitochondrion {ECO:0000269|PubMed:10677481}. Nucleus {ECO:0000269|PubMed:10677481}. Endomembrane system. Note=May associate with membranes.	cytosol [GO:0005829]; endomembrane system [GO:0012505]; mitochondrial outer membrane [GO:0005741]; mitochondrion [GO:0005739]; nucleus [GO:0005634]		2	3	4	52259.7	32419.8	39607	62029.4	76407.9	76851.6	39132.5	40314.1	43695.5	70857.7	45290.5	41542.5	37939.7	37975.2	70079	69689.7	33055.2	40203.2	51979.6	68065.8	31198	25356.6	16911	28028.2	30185.7
Pyridoxal kinase [OS=Homo sapiens]	O00764-1	O00764-1	O00764	SUBCELLULAR LOCATION: Cytoplasm.	cytosol [GO:0005829]; extracellular exosome [GO:0070062]; extracellular region [GO:0005576]; nucleoplasm [GO:0005654]; nucleus [GO:0005634]; secretory granule lumen [GO:0034774]; specific granule lumen [GO:0035580]		2		4	37604.6	13086.2	28984.6	15540	19264	56920.1	24082.4	25415	13496.6	19074.5	39912.4	17058.6	26270.2	13425.6	17001.4	39007.8	14323.4	25632.1	13135.8	18626.7	81988.4	17792.8	30517.9	20732.2	23377.3
Phospholipid phosphatase 3 [OS=Homo sapiens]	O14495	O14495	O14495	SUBCELLULAR LOCATION: Golgi apparatus, trans-Golgi network membrane; Multi-pass membrane protein. Cell membrane; Multi-pass membrane protein.	adherens junction [GO:0005912]; Golgi apparatus [GO:0005794]; integral component of plasma membrane [GO:0005887]; membrane [GO:0016020]; plasma membrane [GO:0005886]			3		Filtered	16648.5	15429.6	6690.99	10290.7	Filtered	17400.3	22051.3	Filtered	12538.3	Filtered	10533.1	14343	Filtered	9557.32	Filtered	Filtered	15329.2	Filtered	10737.6	Filtered	27898.9	14220.5	5614.32	11143.5
Succinate dehydrogenase [ubiquinone] cytochrome b small subunit, mitochondrial [OS=Homo sapiens];Isoform 2 of Succinate dehydrogenase [ubiquinone] cytochrome b small subunit, mitochondrial [OS=Homo sapiens]	O14521;O14521-2	O14521;O14521-2	O14521	SUBCELLULAR LOCATION: Mitochondrion inner membrane; Multi-pass membrane protein.	integral component of membrane [GO:0016021]; mitochondrial envelope [GO:0005740]; mitochondrial inner membrane [GO:0005743]; mitochondrial respiratory chain complex II, succinate dehydrogenase complex (ubiquinone) [GO:0005749]; mitochondrion [GO:0005739]			3		13223.7	36314.4	31470	8598.61	10273.1	6103.33	54501.5	39039.4	9696.53	8503.64	6583.96	23401.7	38633.5	10742.6	10512.9	10616.8	30017.5	35756.4	10459.8	7264.93	17441.8	56556.2	34726.2	10233.6	10510.8
Cytochrome c oxidase subunit 7A-related protein, mitochondrial [OS=Homo sapiens]	O14548	O14548	O14548	SUBCELLULAR LOCATION: Mitochondrion inner membrane {ECO:0000250}.	mitochondrial inner membrane [GO:0005743]; mitochondrial respirasome [GO:0005746]; mitochondrion [GO:0005739]; nucleolus [GO:0005730]			3	4	10349.9	10286.5	8487.96	7042.28	7356.22	16077	11529.5	10160.4	9198.64	7367.03	8965.84	7193.76	9951.65	8666.56	9099.74	13411.6	6806.77	10474.1	10530.8	5254.04	17484.1	12295.2	8340.7	9268.17	6262.45
Heat shock protein beta-6 [OS=Homo sapiens]	O14558	O14558	O14558	SUBCELLULAR LOCATION: Cytoplasm {ECO:0000269|PubMed:19464326}. Nucleus {ECO:0000269|PubMed:19464326}. Secreted {ECO:0000269|PubMed:22427880}. Note=Translocates to nuclear foci during heat shock. {ECO:0000269|PubMed:19464326}.	cytoplasm [GO:0005737]; extracellular region [GO:0005576]; nucleus [GO:0005634]		2		4	25492.7	17008.5	12887.8	13179.8	18178.3	44885.6	22966.4	14461.7	16718.1	18611.1	39464.6	12592.3	11687.6	24673.2	11651.6	49824.9	19963.8	14257	19912.3	15763.3	209778	65431.2	32041.2	39381.4	23664.8
Acyl carrier protein, mitochondrial [OS=Homo sapiens]	O14561	O14561	O14561	SUBCELLULAR LOCATION: Mitochondrion {ECO:0000269|PubMed:12611891, ECO:0000269|PubMed:28892042}.	mitochondrial inner membrane [GO:0005743]; mitochondrial matrix [GO:0005759]; mitochondrial membrane [GO:0031966]; mitochondrial respiratory chain complex I [GO:0005747]; mitochondrion [GO:0005739]; nucleoplasm [GO:0005654]			3	4	Filtered	9780.93	3191.39	17366.1	7276.27	10547.9	8038.71	8295.83	4339.17	2730.95	1231.28	13244	4196.87	4945.46	2844.57	5332.3	2293.14	919.71	2797.84	2053.14	1513.46	Filtered	7975.04	15394	12303.9
coatomer subunit epsilon [OS=Homo sapiens]	O14579-1	O14579-1	O14579	SUBCELLULAR LOCATION: Cytoplasm {ECO:0000250}. Golgi apparatus membrane {ECO:0000250}; Peripheral membrane protein {ECO:0000250}; Cytoplasmic side {ECO:0000250}. Cytoplasmic vesicle, COPI-coated vesicle membrane {ECO:0000250}; Peripheral membrane protein {ECO:0000250}; Cytoplasmic side {ECO:0000250}. Note=The coatomer is cytoplasmic or polymerized on the cytoplasmic side of the Golgi, as well as …	COPI vesicle coat [GO:0030126]; cytosol [GO:0005829]; endoplasmic reticulum membrane [GO:0005789]; Golgi apparatus [GO:0005794]; Golgi membrane [GO:0000139]; nucleoplasm [GO:0005654]; transport vesicle [GO:0030133]		2	3	4	12373.7	18591.8	20484	20146.6	21705.6	31461	25987.3	23535.6	20608.6	21086	19080.4	14794.4	22203.5	13532.5	21066.8	20994.6	11938.7	20737.9	19666.4	18606.4	32917.5	20306.8	22373.2	21016	23024.4
Isoform 5 of AP-3 complex subunit delta-1 [OS=Homo sapiens]	O14617-5	O14617-5	O14617	SUBCELLULAR LOCATION: Cytoplasm {ECO:0000250}. Golgi apparatus membrane {ECO:0000250}; Peripheral membrane protein {ECO:0000250}; Cytoplasmic side {ECO:0000250}.	AP-3 adaptor complex [GO:0030123]; axon cytoplasm [GO:1904115]; endosome membrane [GO:0010008]; glutamatergic synapse [GO:0098978]; Golgi apparatus [GO:0005794]; Golgi membrane [GO:0000139]; lysosomal membrane [GO:0005765]; membrane [GO:0016020]; plasma membrane [GO:0005886]; postsynapse [GO:0098794]; presynaptic endosome [GO:0098830]; terminal bouton [GO:0043195]		2	3		12608.3	4341.19	7816.87	7981.33	10673	28190.3	22477.2	7222.23	7909.78	8401.31	16172.3	7343.73	7428.74	6412.35	9311.54	13807.9	3558.78	7581.29	7748.54	6230.67	17832	9129.21	6818.51	10300.5	10782.5
copper chaperone for superoxide dismutase [OS=Homo sapiens]	O14618	O14618	O14618	SUBCELLULAR LOCATION: Cytoplasm {ECO:0000269|PubMed:9726962}.	cytoplasm [GO:0005737]; cytosol [GO:0005829]; nucleus [GO:0005634]		2		4	24236.8	33244.5	20980.9	42775.3	42259.9	23104.6	46877.9	20783	39611.4	38192.1	28307.2	39000.1	20876.7	49602.2	42389.8	16486	38822.6	22726.7	41552.7	34092.2	28027	81830.7	22714.4	47457.8	40469.9
Isoform 2 of Actin-binding LIM protein 1 [OS=Homo sapiens];Isoform 6 of Actin-binding LIM protein 1 [OS=Homo sapiens]	O14639-2;O14639-6	O14639-2;O14639-6	O14639	SUBCELLULAR LOCATION: Cytoplasm {ECO:0000250}. Cytoplasm, cytoskeleton {ECO:0000250}. Note=Associated with the cytoskeleton. {ECO:0000250}.	actin cytoskeleton [GO:0015629]; cytoplasm [GO:0005737]; lamellipodium [GO:0030027]; stress fiber [GO:0001725]		2			Filtered	12561.3	11860.6	7646.89	13051.9	21605.9	14689.8	9645.22	5729.81	10929.3	22983.3	Filtered	10024.3	Filtered	7552.38	Filtered	Filtered	11867.5	6868.6	10645	Filtered	Filtered	10392.7	4881.52	10944.7
Golgi SNAP receptor complex member 2 [OS=Homo sapiens];Isoform B of Golgi SNAP receptor complex member 2 [OS=Homo sapiens]	O14653-1;O14653-2	O14653-1;O14653-2	O14653	SUBCELLULAR LOCATION: Golgi apparatus, cis-Golgi network membrane {ECO:0000269|PubMed:21549339}; Single-pass type IV membrane protein {ECO:0000255}. Golgi apparatus membrane {ECO:0000269|PubMed:9349823}. Endoplasmic reticulum membrane {ECO:0000250|UniProtKB:O35165}. Note=Concentrated most in the intermediate compartment/cis-Golgi network and the cis-Golgi cisternae 1 and 2. Greatly reduced in con…	cytosol [GO:0005829]; endoplasmic reticulum-Golgi intermediate compartment membrane [GO:0033116]; endoplasmic reticulum membrane [GO:0005789]; ER to Golgi transport vesicle membrane [GO:0012507]; Golgi apparatus [GO:0005794]; Golgi membrane [GO:0000139]; integral component of membrane [GO:0016021]; late endosome membrane [GO:0031902]; membrane [GO:0016020]; SNARE complex [GO:0031201]		2	3		14670.5	5726.87	7946.15	7248.08	6050.78	14455.2	9943.74	8906.95	7142.97	7379.21	5495.75	6204.23	9313.14	7711.42	6885.01	5047.82	6207.91	9590.63	6580.43	5515.9	8077.5	5431.23	6057.65	5293.19	5457.16
Torsin-1A [OS=Homo sapiens]	O14656	O14656	O14656	SUBCELLULAR LOCATION: Endoplasmic reticulum lumen. Nucleus membrane; Peripheral membrane protein. Cell projection, growth cone {ECO:0000250}. Cytoplasmic vesicle membrane {ECO:0000250}. Cytoplasmic vesicle, secretory vesicle {ECO:0000250}. Cytoplasmic vesicle, secretory vesicle, synaptic vesicle. Cytoplasm, cytoskeleton. Note=Upon oxidative stress, redistributes to protusions from the cell surfac…	cell junction [GO:0030054]; cytoplasmic vesicle membrane [GO:0030659]; cytoskeleton [GO:0005856]; cytosol [GO:0005829]; endoplasmic reticulum [GO:0005783]; endoplasmic reticulum lumen [GO:0005788]; extracellular exosome [GO:0070062]; extrinsic component of endoplasmic reticulum membrane [GO:0042406]; growth cone [GO:0030426]; intracellular membrane-bounded organelle [GO:0043231]; membrane [GO:001…		2	3	4	Filtered	Filtered	5220.82	9206.25	9127.32	8029.76	11950.6	7478.45	10302.4	9460.7	Filtered	2329.26	5461.84	7090.21	10176.2	9035.09	5987.91	8414.16	12018.7	8442.27	15056.4	11667.7	5305.17	9902.22	9092.44
Torsin-1B [OS=Homo sapiens]	O14657	O14657	O14657	SUBCELLULAR LOCATION: Endoplasmic reticulum lumen {ECO:0000269|PubMed:15147511}. Nucleus membrane {ECO:0000269|PubMed:15147511}.	endoplasmic reticulum [GO:0005783]; endoplasmic reticulum lumen [GO:0005788]; extracellular exosome [GO:0070062]; nuclear envelope [GO:0005635]; nuclear membrane [GO:0031965]			3	4	Filtered	Filtered	Filtered	12696.1	354.437	Filtered	9324.86	Filtered	514.797	486.319	Filtered	480.739	Filtered	Filtered	Filtered	Filtered	Filtered	4092.69	14491.4	801.23	7070.33	Filtered	1191.64	11991.3	13202.8
Syntaxin-16 [OS=Homo sapiens];Isoform A of Syntaxin-16 [OS=Homo sapiens];Isoform C of Syntaxin-16 [OS=Homo sapiens];Isoform D of Syntaxin-16 [OS=Homo sapiens];Isoform E of Syntaxin-16 [OS=Homo sapiens]	O14662-1;O14662-2;O14662-3;O14662-4;O14662-5	O14662-1;O14662-2;O14662-3;O14662-4;O14662-5	O14662	SUBCELLULAR LOCATION: Golgi apparatus membrane; Single-pass type IV membrane protein.; SUBCELLULAR LOCATION: Isoform C: Cytoplasm.	cytoplasm [GO:0005737]; cytosol [GO:0005829]; endomembrane system [GO:0012505]; focal adhesion [GO:0005925]; Golgi apparatus [GO:0005794]; Golgi cisterna [GO:0031985]; Golgi membrane [GO:0000139]; integral component of membrane [GO:0016021]; integral component of synaptic vesicle membrane [GO:0030285]; intracellular membrane-bounded organelle [GO:0043231]; membrane [GO:0016020]; perinuclear regio…		2	3	4	5280.97	3145.06	3874.33	5136.52	6533.08	Filtered	Filtered	3702.59	5043.67	6007.19	4101.61	4447.54	3044.34	3780.9	6812.2	Filtered	3147.74	3080.56	4916.97	5820.75	Filtered	Filtered	3772.59	4694.17	4924.91
Atp-binding cassette sub-family d member 4 [OS=Homo sapiens]	O14678	O14678	O14678	SUBCELLULAR LOCATION: Peroxisome membrane; Multi-pass membrane protein.	ATP-binding cassette (ABC) transporter complex [GO:0043190]; endoplasmic reticulum membrane [GO:0005789]; integral component of membrane [GO:0016021]; lysosomal membrane [GO:0005765]; peroxisomal membrane [GO:0005778]; peroxisome [GO:0005777]			3		Filtered	5387.06	Filtered	4563.32	8505.86	2282.29	Filtered	3659.34	5273.54	7867.29	3592.63	5575.59	4035.26	6748.37	8806.95	Filtered	Filtered	4158.12	6075.68	8470.44	1608.01	Filtered	Filtered	3290.72	Filtered
Etoposide-induced protein 2.4 homolog [OS=Homo sapiens];Isoform 2 of Etoposide-induced protein 2.4 homolog [OS=Homo sapiens]	O14681;O14681-3	O14681;O14681-3	O14681	SUBCELLULAR LOCATION: Nucleus membrane {ECO:0000269|PubMed:21154811}; Multi-pass membrane protein {ECO:0000269|PubMed:21154811}. Cytoplasm {ECO:0000269|PubMed:21154811}. Endoplasmic reticulum membrane {ECO:0000250}; Multi-pass membrane protein {ECO:0000250}.	cytosol [GO:0005829]; endoplasmic reticulum [GO:0005783]; endoplasmic reticulum membrane [GO:0005789]; Golgi apparatus [GO:0005794]; integral component of membrane [GO:0016021]; membrane [GO:0016020]; nuclear membrane [GO:0031965]		2	3	4	53345.5	27514.7	40915.6	42241.9	46057.4	84477.1	40769.9	22358.1	40947	42623.1	54264.3	27261.8	20930.3	35991.6	52341.6	Filtered	37784.5	27321.1	38812.9	43114.9	10880.5	Filtered	10164.7	14388.7	15173.8
apoptotic protease-activating factor 1 [OS=Homo sapiens];Isoform 2 of Apoptotic protease-activating factor 1 [OS=Homo sapiens];Isoform 3 of Apoptotic protease-activating factor 1 [OS=Homo sapiens];Isoform 4 of Apoptotic protease-activating factor 1 [OS=Homo sapiens];Isoform 5 of Apoptotic protease-activating factor 1 [OS=Homo sapiens]	O14727;O14727-2;O14727-3;O14727-4;O14727-5	O14727;O14727-2;O14727-3;O14727-4;O14727-5	O14727	SUBCELLULAR LOCATION: Cytoplasm {ECO:0000269|PubMed:12804598}.	apoptosome [GO:0043293]; cytosol [GO:0005829]; extracellular exosome [GO:0070062]; extracellular region [GO:0005576]; ficolin-1-rich granule lumen [GO:1904813]; nucleus [GO:0005634]; protein-containing complex [GO:0032991]; secretory granule lumen [GO:0034774]		2		4	Filtered	Filtered	5823.78	Filtered	Filtered	Filtered	Filtered	3528.06	Filtered	Filtered	Filtered	Filtered	2212.21	Filtered	234.363	Filtered	Filtered	6337.58	Filtered	628.755	Filtered	Filtered	2044.64	Filtered	250.282
inositol monophosphatase 2 [OS=Homo sapiens];Isoform 2 of Inositol monophosphatase 2 [OS=Homo sapiens]	O14732-1;O14732-2	O14732-1;O14732-2	O14732	0	cytoplasm [GO:0005737]; cytosol [GO:0005829]		2			Filtered	7657.11	4966.39	1091.58	5478.26	13877.5	8926.64	Filtered	4712.21	4719.99	15855.1	Filtered	605.879	6268.22	5863.77	10791.2	719.232	1967.18	4189.47	822.727	9646.3	13653.3	Filtered	2761.53	3896.98
Acyl-coenzyme A thioesterase 8 [OS=Homo sapiens]	O14734	O14734	O14734	SUBCELLULAR LOCATION: Cytoplasm {ECO:0000269|PubMed:10092594}. Peroxisome matrix {ECO:0000269|PubMed:10092594, ECO:0000269|PubMed:15194431}. Note=Predominantly localized in the peroxisome (PubMed:10092594, PubMed:15194431). {ECO:0000269|PubMed:10092594, ECO:0000269|PubMed:15194431}.	cytosol [GO:0005829]; peroxisomal matrix [GO:0005782]		2			Filtered	Filtered	4534.06	Filtered	Filtered	7627.94	Filtered	3832.16	Filtered	Filtered	Filtered	448.589	4805.72	Filtered	Filtered	7028.65	Filtered	7073.65	Filtered	Filtered	4424.91	Filtered	Filtered	Filtered	Filtered
CDP-diacylglycerol--inositol 3-phosphatidyltransferase [OS=Homo sapiens];Isoform 3 of CDP-diacylglycerol--inositol 3-phosphatidyltransferase [OS=Homo sapiens]	O14735;O14735-3	O14735;O14735-3	O14735	SUBCELLULAR LOCATION: Endoplasmic reticulum membrane {ECO:0000250}; Multi-pass membrane protein {ECO:0000250}. Golgi apparatus membrane {ECO:0000250}; Multi-pass membrane protein {ECO:0000250}. Cell membrane {ECO:0000250}; Multi-pass membrane protein {ECO:0000250}. Membrane {ECO:0000269|PubMed:8110188}.	endoplasmic reticulum membrane [GO:0005789]; Golgi apparatus [GO:0005794]; Golgi membrane [GO:0000139]; integral component of membrane [GO:0016021]; membrane [GO:0016020]; plasma membrane [GO:0005886]			3		33669.6	15775.4	23158.9	11897.8	9917.84	58836.4	27393.9	19990.2	10725.7	11530.9	52741.7	17850.3	14922.9	14112.7	11805.5	42477	18549.4	21130.5	11576.7	10227.8	49037.9	41162.8	40318.3	20502	17519.6
Programmed cell death protein 5 [OS=Homo sapiens]	O14737	O14737	O14737	0	cytoplasm [GO:0005737]; cytosol [GO:0005829]; extracellular exosome [GO:0070062]; nucleus [GO:0005634]		2		4	19127.2	21181.4	11743.8	21086.4	23425.1	34612.2	31018.8	14964.3	19324.4	23783	38760.1	22418.3	15518.6	25642	21867.1	26457.6	21547.1	13749.3	17988.1	20151.4	40607.3	15948.3	15252.1	20827.2	20522.4
Protein arginine N-methyltransferase 5 [OS=Homo sapiens];Isoform 2 of Protein arginine N-methyltransferase 5 [OS=Homo sapiens];Isoform 3 of Protein arginine N-methyltransferase 5 [OS=Homo sapiens];Isoform 5 of Protein arginine N-methyltransferase 5 [OS=Homo sapiens]	O14744;O14744-2;O14744-3;O14744-5	O14744;O14744-2;O14744-3;O14744-5	O14744	SUBCELLULAR LOCATION: Cytoplasm {ECO:0000269|PubMed:21081503, ECO:0000269|PubMed:21917714, ECO:0000269|PubMed:22269951}. Nucleus {ECO:0000269|PubMed:18404153, ECO:0000269|PubMed:21081503, ECO:0000269|PubMed:21917714, ECO:0000269|PubMed:22269951}. Golgi apparatus {ECO:0000269|PubMed:20421892}.	cytoplasm [GO:0005737]; cytosol [GO:0005829]; Golgi apparatus [GO:0005794]; histone methyltransferase complex [GO:0035097]; methylosome [GO:0034709]; nucleoplasm [GO:0005654]; nucleus [GO:0005634]		2		4	3295.2	14630.7	14656	7528.85	3942.25	Filtered	37363.2	11246.4	4463.55	4404.21	6142.34	16715.4	11695.8	5189.73	3648.47	3850.29	17279.2	11878.2	4550.74	5358.37	Filtered	51068.3	15119.9	6363.22	4921.93
Na(+)/H(+) exchange regulatory cofactor NHE-RF1 [OS=Homo sapiens]	O14745	O14745	O14745	SUBCELLULAR LOCATION: Cytoplasm {ECO:0000250}. Apical cell membrane {ECO:0000250}. Endomembrane system; Peripheral membrane protein. Cell projection, filopodium. Cell projection, ruffle. Cell projection, microvillus. Note=Translocates from the cytoplasm to the apical cell membrane in a PODXL-dependent manner. Colocalizes with CFTR at the midpiece of sperm tail (By similarity). Colocalizes with ac…	actin cytoskeleton [GO:0015629]; apical plasma membrane [GO:0016324]; brush border membrane [GO:0031526]; cell periphery [GO:0071944]; cytoplasm [GO:0005737]; endomembrane system [GO:0012505]; extracellular exosome [GO:0070062]; filopodium [GO:0030175]; membrane [GO:0016020]; membrane raft [GO:0045121]; microvillus [GO:0005902]; microvillus membrane [GO:0031528]; perinuclear region of cytoplasm […		2	3	4	161158	108614	73949.2	148413	163660	228642	190790	75706.6	134060	136949	204187	144594	77575.3	152800	149820	150291	117059	78830.2	131510	132066	180733	263320	89444.5	171928	157648
17-beta-hydroxysteroid dehydrogenase type 6 [OS=Homo sapiens]	O14756	O14756	O14756	SUBCELLULAR LOCATION: Microsome membrane {ECO:0000269|PubMed:11360992}; Peripheral membrane protein {ECO:0000269|PubMed:11360992}; Lumenal side {ECO:0000269|PubMed:11360992}. Early endosome membrane {ECO:0000305}; Peripheral membrane protein {ECO:0000305}; Lumenal side {ECO:0000305}.	early endosome membrane [GO:0031901]; endoplasmic reticulum [GO:0005783]			3		562775	539086	636942	560905	545185	381776	992682	551310	498417	547389	564994	678100	523426	555484	582220	358503	591686	517732	452048	549788	173095	219560	167854	165956	166817
fucose-1-phosphate guanylyltransferase [OS=Homo sapiens]	O14772	O14772	O14772	SUBCELLULAR LOCATION: Cytoplasm.	cytoplasm [GO:0005737]; cytosol [GO:0005829]		2			Filtered	Filtered	3107.92	Filtered	Filtered	Filtered	Filtered	2322.95	Filtered	Filtered	Filtered	2072.78	2354.89	Filtered	Filtered	Filtered	Filtered	2801.18	Filtered	1815.51	Filtered	Filtered	2204.92	Filtered	Filtered
Tripeptidyl-peptidase 1 [OS=Homo sapiens];Isoform 2 of Tripeptidyl-peptidase 1 [OS=Homo sapiens]	O14773;O14773-2	O14773;O14773-2	O14773	SUBCELLULAR LOCATION: Lysosome {ECO:0000269|PubMed:19941651}. Melanosome {ECO:0000269|PubMed:12643545}. Note=Identified by mass spectrometry in melanosome fractions from stage I to stage IV. {ECO:0000269|PubMed:12643545}.	extracellular exosome [GO:0070062]; lysosomal lumen [GO:0043202]; lysosome [GO:0005764]; melanosome [GO:0042470]					170129	107817	72975.8	70249.6	63481.6	135901	165514	81483.9	86669.9	73045.6	210757	96621.7	74585.4	135011	59215.9	154672	103117	63350	70683.3	57082.1	289942	214473	83149	89788.4	100569
Neuropilin-1 [OS=Homo sapiens];Isoform 2 of Neuropilin-1 [OS=Homo sapiens];Isoform 3 of Neuropilin-1 [OS=Homo sapiens]	O14786-1;O14786-2;O14786-3	O14786-1;O14786-2;O14786-3	O14786	SUBCELLULAR LOCATION: Cell membrane; Single-pass type I membrane protein.; SUBCELLULAR LOCATION: Isoform 2: Secreted.	axon [GO:0030424]; cell surface [GO:0009986]; cytoplasmic vesicle [GO:0031410]; cytosol [GO:0005829]; early endosome [GO:0005769]; extracellular space [GO:0005615]; focal adhesion [GO:0005925]; glutamatergic synapse [GO:0098978]; growth cone [GO:0030426]; integral component of postsynaptic membrane [GO:0099055]; neurofilament [GO:0005883]; neuronal cell body [GO:0043025]; neuron projection [GO:00…	1	2	3		Filtered	Filtered	7158.74	2669.64	Filtered	Filtered	Filtered	3587.05	1342.92	3390.8	Filtered	3868.56	3772.58	Filtered	Filtered	Filtered	5886.74	3973.02	Filtered	Filtered	Filtered	8368.95	8065.75	2040.71	Filtered
Proteasome subunit alpha type-7 [OS=Homo sapiens]	O14818-1	O14818-1	O14818	SUBCELLULAR LOCATION: Cytoplasm {ECO:0000269|PubMed:12181345}. Nucleus {ECO:0000269|PubMed:12181345}.	cytoplasm [GO:0005737]; cytosol [GO:0005829]; extracellular exosome [GO:0070062]; nucleoplasm [GO:0005654]; nucleus [GO:0005634]; postsynapse [GO:0098794]; proteasome complex [GO:0000502]; proteasome core complex [GO:0005839]; proteasome core complex, alpha-subunit complex [GO:0019773]		2		4	58943.3	78262.6	49983.6	45023.4	45480.8	22197.5	140225	40379.3	43603.6	40780.2	63186.9	77172.2	44297.7	67645.7	44563	43184	71355.6	47278	39684.4	38775.9	66307.1	144604	54873.8	39424.9	41528.1
Secretory carrier-associated membrane protein 3 [OS=Homo sapiens];Isoform 2 of Secretory carrier-associated membrane protein 3 [OS=Homo sapiens]	O14828;O14828-2	O14828;O14828-2	O14828	SUBCELLULAR LOCATION: Membrane; Multi-pass membrane protein.	extracellular exosome [GO:0070062]; Golgi apparatus [GO:0005794]; Golgi membrane [GO:0000139]; integral component of membrane [GO:0016021]; intracellular membrane-bounded organelle [GO:0043231]; recycling endosome membrane [GO:0055038]; trans-Golgi network membrane [GO:0032588]			3		18318.6	19480	7645.46	11193.2	13246.9	30242.6	25286	10783	17735.5	15900.4	Filtered	14564.3	16782.3	12783.6	13303.7	17377.6	24919.8	10632.4	16733.6	13547.2	14894.6	13865.1	16987.2	11668.8	15990.4
Phytanoyl-CoA dioxygenase, peroxisomal [OS=Homo sapiens];Isoform 2 of Phytanoyl-CoA dioxygenase, peroxisomal [OS=Homo sapiens]	O14832;O14832-2	O14832;O14832-2	O14832	SUBCELLULAR LOCATION: Peroxisome.	cytosol [GO:0005829]; mitochondrion [GO:0005739]; peroxisomal matrix [GO:0005782]; peroxisome [GO:0005777]		2			Filtered	5551.1	4537.27	6465.7	15089.4	13033.4	7136.97	3499.7	12482.2	15532.4	1168.78	12879.9	9381.2	5332.88	14593.3	Filtered	9502.58	12368.7	17760.3	13521.2	10812.1	6917.15	8292.54	14042.9	6742.09
5-oxoprolinase [OS=Homo sapiens]	O14841	O14841	O14841	0	cytosol [GO:0005829]		2			15434.6	6719.58	13356.3	11800.8	14839	22369.5	11728.2	15232.5	9188.55	14254.6	10096.4	12082.2	15033.7	8032.39	14895.2	18593.1	7413.26	15789.8	10354.8	13828.5	19327.2	13693.7	12286	11291.4	12309
[3-methyl-2-oxobutanoate dehydrogenase [lipoamide]] kinase, mitochondrial [OS=Homo sapiens]	O14874	O14874	O14874	SUBCELLULAR LOCATION: Mitochondrion matrix. Mitochondrion {ECO:0000269|PubMed:24449431}.	mitochondrial alpha-ketoglutarate dehydrogenase complex [GO:0005947]; mitochondrial matrix [GO:0005759]; mitochondrion [GO:0005739]					40128.6	16574.4	18761.4	24823.9	24150.7	57786.2	71080.2	19175.1	21548.2	23645.8	58564.5	22302.8	19945.5	28891.3	26431	62401.4	15807.3	20324.2	25602	24716	55403.1	26345.4	11476.6	20800.6	28088.8
Microsomal glutathione S-transferase 3 [OS=Homo sapiens]	O14880	O14880	O14880	SUBCELLULAR LOCATION: Endoplasmic reticulum membrane {ECO:0000305}; Multi-pass membrane protein {ECO:0000305}. Microsome membrane {ECO:0000305}; Multi-pass membrane protein {ECO:0000305}. Microsome membrane {ECO:0000305}; Lipid-anchor {ECO:0000305}. Membrane {ECO:0000269|PubMed:9278457}.	endoplasmic reticulum [GO:0005783]; endoplasmic reticulum membrane [GO:0005789]; integral component of membrane [GO:0016021]; intracellular membrane-bounded organelle [GO:0043231]; membrane [GO:0016020]; nuclear envelope [GO:0005635]			3	4	36812.1	132969	153883	40232	51295.1	27792.4	221422	164625	28085.3	52581.6	38018.5	114045	158256	39253.2	50398	21895.6	110699	175547	30912.2	51931	55144.8	201748	186117	46928.5	63095.4
Interferon regulatory factor 6 [OS=Homo sapiens];Isoform 2 of Interferon regulatory factor 6 [OS=Homo sapiens]	O14896-1;O14896-2	O14896-1;O14896-2	O14896	SUBCELLULAR LOCATION: Nucleus {ECO:0000305}. Cytoplasm {ECO:0000269|PubMed:16049006, ECO:0000269|PubMed:18212048}. Note=Translocates to nucleus in response to an activating signal. {ECO:0000250}.	cell junction [GO:0030054]; cytoplasm [GO:0005737]; cytosol [GO:0005829]; extracellular exosome [GO:0070062]; nucleus [GO:0005634]		2		4	Filtered	2135.42	3930.44	Filtered	Filtered	Filtered	Filtered	6859.01	781.379	Filtered	Filtered	4385.45	7950.32	Filtered	Filtered	Filtered	Filtered	8838.92	639.095	Filtered	Filtered	Filtered	5013.19	Filtered	Filtered
Mitochondrial import inner membrane translocase subunit tim23 [OS=Homo sapiens]	O14925	O14925	O14925	SUBCELLULAR LOCATION: Mitochondrion inner membrane {ECO:0000269|PubMed:25997101}; Multi-pass membrane protein {ECO:0000255}.	integral component of mitochondrial inner membrane [GO:0031305]; mitochondrial inner membrane [GO:0005743]; mitochondrial intermembrane space [GO:0005758]; mitochondrion [GO:0005739]; TIM23 mitochondrial import inner membrane translocase complex [GO:0005744]			3		Filtered	3735.72	1406.94	126.273	Filtered	Filtered	Filtered	1727.74	Filtered	Filtered	Filtered	Filtered	1747.76	Filtered	290.003	Filtered	Filtered	2374.89	Filtered	Filtered	Filtered	Filtered	1497.15	Filtered	888.218
Ubiquitin/ISG15-conjugating enzyme E2 L6 [OS=Homo sapiens];Isoform 2 of Ubiquitin/ISG15-conjugating enzyme E2 L6 [OS=Homo sapiens]	O14933;O14933-2	O14933;O14933-2	O14933	0	cytosol [GO:0005829]; nucleoplasm [GO:0005654]; ubiquitin ligase complex [GO:0000151]		2		4	9868.2	9665.93	12993.7	8602.11	10757.1	8854.11	15163.5	9506.11	7626.55	9422.78	5949.66	10413.6	10584	10272.1	9638.28	13732.2	7574.11	11399.4	9107.85	8104.38	10951.4	6384.91	6226.61	5479.31	4789.91
peripheral plasma membrane protein CASK [OS=Homo sapiens];Isoform 2 of Peripheral plasma membrane protein CASK [OS=Homo sapiens];Isoform 3 of Peripheral plasma membrane protein CASK [OS=Homo sapiens];Isoform 4 of Peripheral plasma membrane protein CASK [OS=Homo sapiens];Isoform 6 of Peripheral plasma membrane protein CASK [OS=Homo sapiens]	O14936;O14936-2;O14936-3;O14936-4;O14936-6	O14936;O14936-2;O14936-3;O14936-4;O14936-6	O14936	SUBCELLULAR LOCATION: Nucleus {ECO:0000250}. Cytoplasm {ECO:0000250}. Cell membrane {ECO:0000250}; Peripheral membrane protein {ECO:0000250}.	actin cytoskeleton [GO:0015629]; basement membrane [GO:0005604]; basolateral plasma membrane [GO:0016323]; cell-cell junction [GO:0005911]; ciliary membrane [GO:0060170]; cytoplasm [GO:0005737]; cytosol [GO:0005829]; focal adhesion [GO:0005925]; nuclear lamina [GO:0005652]; nuclear matrix [GO:0016363]; nucleolus [GO:0005730]; plasma membrane [GO:0005886]; presynaptic membrane [GO:0042734]; Schaff…		2	3	4	2999.49	7859.06	21286.4	5857.54	9411.48	6603.66	4131.19	14354.6	5664.63	9631.91	5711.71	11998.2	13086.5	3253.25	9473.99	5281.33	19227.7	12705.8	9426.93	9682.41	5.47876	5947.98	22886.7	7824.6	8235.83
Cytochrome b-c1 complex subunit 8 [OS=Homo sapiens]	O14949	O14949	O14949	SUBCELLULAR LOCATION: Mitochondrion inner membrane.	mitochondrial inner membrane [GO:0005743]; mitochondrial respiratory chain complex III [GO:0005750]; mitochondrion [GO:0005739]			3		48425.8	29076.8	24515.5	36107.5	32883.5	65020.4	104878	23418.8	42678.7	35323.6	68866.9	25004.3	25509.6	42729.8	37326.5	52369.9	32284.5	22876.5	38364.1	31242.9	103130	112271	37767	51100.7	51715.6
Myosin regulatory light chain 12B [OS=Homo sapiens]	O14950	O14950	O14950	0	cell cortex region [GO:0099738]; cytosol [GO:0005829]; extracellular exosome [GO:0070062]; myosin complex [GO:0016459]		2			62098.8	115914	216250	152276	208785	110630	270409	218698	161925	196454	112642	221523	197334	180091	213640	87831.6	130691	182191	166732	152839	183504	283154	318529	197010	238376
Hepatocyte growth factor-regulated tyrosine kinase substrate [OS=Homo sapiens];Isoform 2 of Hepatocyte growth factor-regulated tyrosine kinase substrate [OS=Homo sapiens]	O14964;O14964-2	O14964;O14964-2	O14964	SUBCELLULAR LOCATION: Cytoplasm {ECO:0000250|UniProtKB:Q9JJ50}. Early endosome membrane {ECO:0000269|PubMed:23166352, ECO:0000269|PubMed:24790097}; Peripheral membrane protein {ECO:0000305|PubMed:23166352, ECO:0000305|PubMed:24790097}; Cytoplasmic side {ECO:0000305|PubMed:23166352, ECO:0000305|PubMed:24790097}. Endosome, multivesicular body membrane {ECO:0000250|UniProtKB:Q9JJ50}; Peripheral memb…	cytosol [GO:0005829]; early endosome [GO:0005769]; early endosome membrane [GO:0031901]; endosome [GO:0005768]; ESCRT-0 complex [GO:0033565]; extracellular exosome [GO:0070062]; intracellular membrane-bounded organelle [GO:0043231]; lysosome [GO:0005764]; multivesicular body membrane [GO:0032585]		2	3		15300.2	Filtered	2089.42	10582.6	11274.7	27742.3	Filtered	2964.91	7980.36	12173.2	23715.2	Filtered	3267.47	11080.6	10265.4	39802.7	Filtered	3359.64	9493.17	10749.2	45663.9	Filtered	3968.29	12405.1	11342.6
Down syndrome critical region protein 3 [OS=Homo sapiens];Isoform 2 of Down syndrome critical region protein 3 [OS=Homo sapiens]	O14972;O14972-2	O14972;O14972-2	O14972	SUBCELLULAR LOCATION: Endosome {ECO:0000305|PubMed:28892079}.	endosome [GO:0005768]; nucleus [GO:0005634]				4	Filtered	Filtered	Filtered	3299.25	2170.91	Filtered	Filtered	Filtered	Filtered	1443.08	Filtered	Filtered	1473.01	Filtered	2309.63	Filtered	Filtered	Filtered	2744.36	2310.52	Filtered	Filtered	Filtered	3804.35	Filtered
Protein phosphatase 1 regulatory subunit 12A [OS=Homo sapiens];Isoform 5 of Protein phosphatase 1 regulatory subunit 12A [OS=Homo sapiens]	O14974;O14974-5	O14974;O14974-5	O14974	SUBCELLULAR LOCATION: Cytoplasm {ECO:0000269|PubMed:12923170, ECO:0000269|PubMed:18477460}. Cytoplasm, cytoskeleton, stress fiber {ECO:0000269|PubMed:12923170}. Note=Also along actomyosin filaments. {ECO:0000269|PubMed:12923170}.	A band [GO:0031672]; actin cytoskeleton [GO:0015629]; centrosome [GO:0005813]; contractile fiber [GO:0043292]; cytoplasm [GO:0005737]; cytosol [GO:0005829]; focal adhesion [GO:0005925]; kinetochore [GO:0000776]; nucleoplasm [GO:0005654]; PTW/PP1 phosphatase complex [GO:0072357]; Z disc [GO:0030018]		2		4	Filtered	573.26	2410.23	782.902	2146.33	Filtered	Filtered	3062.43	Filtered	3657.78	Filtered	726.222	3296.98	Filtered	1038.72	Filtered	525.41	2516.2	1881.27	1421.83	Filtered	Filtered	4801.86	2528.48	3403.91
very long-chain acyl-CoA synthetase [OS=Homo sapiens]	O14975	O14975	O14975	SUBCELLULAR LOCATION: Endoplasmic reticulum membrane; Multi-pass membrane protein. Peroxisome membrane; Multi-pass membrane protein. Note=Peripheral membrane associated with the lumenal side of peroxisomes.	cytosol [GO:0005829]; endoplasmic reticulum [GO:0005783]; endoplasmic reticulum lumen [GO:0005788]; endoplasmic reticulum membrane [GO:0005789]; extracellular exosome [GO:0070062]; integral component of endoplasmic reticulum membrane [GO:0030176]; integral component of peroxisomal membrane [GO:0005779]; peroxisomal membrane [GO:0005778]; plasma membrane [GO:0005886]; specific granule membrane [GO…		2	3		46976.4	41848.6	94417.8	20918.7	26981.4	26336	159284	73171.5	19276.5	22531.9	23813.4	23404.1	56818.6	19385	19395.2	32996.7	20806.9	88220.5	17029.3	20610.6	46904.9	29207	39834.8	16515.1	19980.4
Cyclin-G-associated kinase [OS=Homo sapiens];Isoform 2 of Cyclin-G-associated kinase [OS=Homo sapiens]	O14976;O14976-2	O14976;O14976-2	O14976	SUBCELLULAR LOCATION: Cytoplasm, perinuclear region {ECO:0000269|PubMed:10625686}. Golgi apparatus, trans-Golgi network {ECO:0000269|PubMed:10625686}. Cell junction, focal adhesion {ECO:0000305|PubMed:10625686}. Note=Localizes to the perinuclear area and to the trans-Golgi network. Also seen on the plasma membrane, probably at focal adhesions.	cytoplasm [GO:0005737]; cytosol [GO:0005829]; focal adhesion [GO:0005925]; Golgi apparatus [GO:0005794]; intracellular membrane-bounded organelle [GO:0043231]; membrane [GO:0016020]; perinuclear region of cytoplasm [GO:0048471]; presynapse [GO:0098793]; vesicle [GO:0031982]		2	3	4	Filtered	3116.28	4622.08	2520.8	2732.92	5424.14	Filtered	4159.86	2214.83	3249.48	Filtered	4283.45	4082.14	2096.59	2415.53	2330.65	2813.15	3789.47	2002.23	2470.9	2790.56	Filtered	3993.25	2199.43	2191.93
Heterogeneous nuclear ribonucleoprotein D-like [OS=Homo sapiens];Isoform 2 of Heterogeneous nuclear ribonucleoprotein D-like [OS=Homo sapiens];Isoform 3 of Heterogeneous nuclear ribonucleoprotein D-like [OS=Homo sapiens]	O14979-1;O14979-2;O14979-3	O14979-1;O14979-2;O14979-3	O14979	SUBCELLULAR LOCATION: Nucleus {ECO:0000269|PubMed:11705999, ECO:0000269|PubMed:12406575}. Cytoplasm {ECO:0000269|PubMed:11705999, ECO:0000269|PubMed:12406575}. Note=Shuttles between the nucleus and the cytoplasm in a TNPO1-dependent manner. {ECO:0000269|PubMed:11705999, ECO:0000269|PubMed:12406575}.	cytosol [GO:0005829]; nucleoplasm [GO:0005654]; nucleus [GO:0005634]; ribonucleoprotein complex [GO:1990904]; spliceosomal complex [GO:0005681]		2		4	25260	16614.7	21957.6	21209.5	27988.6	31301.3	27400.2	23193.7	42540.2	48788.7	6295.08	18616.3	24025	14042.7	20253.8	17752.1	16816.7	19797.5	26234.6	19239.4	Filtered	26510.4	22552	28765	20694.9
Exportin-1 [OS=Homo sapiens]	O14980	O14980	O14980	SUBCELLULAR LOCATION: Cytoplasm. Nucleus, nucleoplasm. Nucleus, Cajal body. Nucleus, nucleolus. Note=Located in the nucleoplasm, Cajal bodies and nucleoli. Shuttles between the nucleus/nucleolus and the cytoplasm.	annulate lamellae [GO:0005642]; Cajal body [GO:0015030]; cytoplasm [GO:0005737]; cytosol [GO:0005829]; host cell [GO:0043657]; intracellular membrane-bounded organelle [GO:0043231]; kinetochore [GO:0000776]; membrane [GO:0016020]; nuclear envelope [GO:0005635]; nuclear membrane [GO:0031965]; nucleolus [GO:0005730]; nucleoplasm [GO:0005654]; nucleus [GO:0005634]; protein-containing complex [GO:003…		2	3	4	7649.82	2974.18	16441.3	3257.23	4421.04	25205	14443.1	16290.4	2490.98	4622.57	7140.37	5617.11	15758.1	1548.53	4332.62	17421.5	3926.41	18298.3	3355.84	4839.41	25481	3381.88	19226.3	4165.7	3284.57
Spectrin beta chain, non-erythrocytic 2 [OS=Homo sapiens];Isoform 2 of Spectrin beta chain, non-erythrocytic 2 [OS=Homo sapiens]	O15020;O15020-2	O15020;O15020-2	O15020	SUBCELLULAR LOCATION: Cytoplasm, cytoskeleton. Cytoplasm, cell cortex.	apical plasma membrane [GO:0016324]; cell junction [GO:0030054]; cytosol [GO:0005829]; extracellular space [GO:0005615]; glutamatergic synapse [GO:0098978]; neuronal cell body [GO:0043025]; parallel fiber to Purkinje cell synapse [GO:0098688]; postsynaptic spectrin-associated cytoskeleton [GO:0099189]; presynapse [GO:0098793]; spectrin [GO:0008091]	1	2	3		58522.7	54796.3	30394.7	62457.6	64534.1	138499	83997.2	35251	63491.8	74545.6	88914	58631.7	36329.6	70608	71286.4	62127.9	48225	35973.8	65557.1	70476.7	216282	616932	33471.3	63894.9	63227.5
Protein transport protein Sec16A [OS=Homo sapiens];Isoform 2 of Protein transport protein Sec16A [OS=Homo sapiens];Isoform 3 of Protein transport protein Sec16A [OS=Homo sapiens];Isoform 4 of Protein transport protein Sec16A [OS=Homo sapiens];Isoform 5 of Protein transport protein Sec16A [OS=Homo sapiens]	O15027-1;O15027-2;O15027-3;O15027-4;O15027-5	O15027-1;O15027-2;O15027-3;O15027-4;O15027-5	O15027	SUBCELLULAR LOCATION: Endoplasmic reticulum membrane {ECO:0000269|PubMed:17005010, ECO:0000269|PubMed:29300766}; Peripheral membrane protein {ECO:0000269|PubMed:17005010}. Golgi apparatus membrane {ECO:0000305}; Peripheral membrane protein {ECO:0000305}. Cytoplasm, perinuclear region {ECO:0000250|UniProtKB:E9QAT4}. Cytoplasm, cytosol {ECO:0000269|PubMed:17428803, ECO:0000269|PubMed:21768384}. Mic…	cytosol [GO:0005829]; endoplasmic reticulum [GO:0005783]; endoplasmic reticulum exit site [GO:0070971]; endoplasmic reticulum membrane [GO:0005789]; ER to Golgi transport vesicle membrane [GO:0012507]; Golgi apparatus [GO:0005794]; Golgi membrane [GO:0000139]; organelle membrane [GO:0031090]; perinuclear region of cytoplasm [GO:0048471]		2	3	4	15651.9	3179.82	16405.3	6988.23	5510.41	50840.6	6686.21	12864.3	2294.85	6583.05	8119.5	9598.48	11782.5	1825.27	9099.99	23654.9	3744.43	12317	4917.8	6350.64	22281.4	3037.14	11393.3	6380.18	8453.49
Plexin-B2 [OS=Homo sapiens]	O15031	O15031	O15031	SUBCELLULAR LOCATION: Cell membrane {ECO:0000269|PubMed:12533544}; Single-pass type I membrane protein {ECO:0000255}.	cell surface [GO:0009986]; extracellular exosome [GO:0070062]; integral component of plasma membrane [GO:0005887]; semaphorin receptor complex [GO:0002116]			3		Filtered	3491.29	5257.04	3955.08	618.401	Filtered	Filtered	5016.75	2797.45	2966.93	Filtered	2915.86	5745.45	1360.75	2791.57	17966.5	326.296	5167.75	2915.18	4221.98	14293.2	8841.69	5340.41	2655.24	4341.71
U2 snRNP-associated SURP motif-containing protein [OS=Homo sapiens];Isoform 2 of U2 snRNP-associated SURP motif-containing protein [OS=Homo sapiens];Isoform 3 of U2 snRNP-associated SURP motif-containing protein [OS=Homo sapiens]	O15042;O15042-2;O15042-3	O15042;O15042-2;O15042-3	O15042	SUBCELLULAR LOCATION: Nucleus {ECO:0000269|PubMed:20858735}.	nucleoplasm [GO:0005654]; nucleus [GO:0005634]				4	Filtered	18236.4	15931	14532.4	6410.8	Filtered	Filtered	5100.24	Filtered	5968.26	Filtered	6328.23	4947.4	Filtered	5223.45	Filtered	Filtered	6592.28	12890	14377.1	Filtered	Filtered	1047.74	11529.6	11901.3
Phosphoribosylformylglycinamidine synthase [OS=Homo sapiens]	O15067	O15067	O15067	SUBCELLULAR LOCATION: Cytoplasm {ECO:0000250}.	cytoplasm [GO:0005737]; cytosol [GO:0005829]; extracellular exosome [GO:0070062]		2			14203	18719.1	12902.4	17010.9	17414.2	13836.6	19296.1	6938.87	14671.3	17775.5	13713.6	13381.2	6175.59	17113.6	16561.6	9297.66	17085.1	6560.82	16070.6	17933.3	15858.3	13682.8	8259.96	16637.4	12905.6
Centrosomal protein of 290 kDa [OS=Homo sapiens];Isoform 2 of Centrosomal protein of 290 kDa [OS=Homo sapiens]	O15078-1;O15078-2	O15078-1;O15078-2	O15078	SUBCELLULAR LOCATION: Cytoplasm, cytoskeleton, microtubule organizing center, centrosome {ECO:0000269|PubMed:14654843, ECO:0000269|PubMed:16682973, ECO:0000269|PubMed:21493627, ECO:0000269|PubMed:21565611, ECO:0000269|PubMed:22797915}. Cytoplasm, cytoskeleton, microtubule organizing center, centrosome, centriolar satellite {ECO:0000269|PubMed:17705300, ECO:0000269|PubMed:21493627, ECO:0000269|Pub…	centriolar satellite [GO:0034451]; centriole [GO:0005814]; centrosome [GO:0005813]; ciliary basal body [GO:0036064]; ciliary transition zone [GO:0035869]; cytoplasm [GO:0005737]; cytosol [GO:0005829]; extracellular region [GO:0005576]; membrane [GO:0016020]; MKS complex [GO:0036038]; nucleus [GO:0005634]; photoreceptor connecting cilium [GO:0032391]; protein-containing complex [GO:0032991]; speci…		2	3	4	Filtered	Filtered	78288.9	77633.5	146200	224767	148831	59095.8	131550	102749	54780.7	Filtered	105276	81649.6	91879.5	110717	31892.7	26909.6	119483	51056.2	105967	40484.4	54676.4	107440	89019.6
Mitochondrial ribonuclease P protein 3 [OS=Homo sapiens];Isoform 2 of Mitochondrial ribonuclease P protein 3 [OS=Homo sapiens];Isoform 4 of Mitochondrial ribonuclease P protein 3 [OS=Homo sapiens]	O15091;O15091-2;O15091-4	O15091;O15091-2;O15091-4	O15091	SUBCELLULAR LOCATION: Mitochondrion {ECO:0000269|PubMed:18984158}.	mitochondrial matrix [GO:0005759]; mitochondrial nucleoid [GO:0042645]; mitochondrial ribonuclease P complex [GO:0030678]; mitochondrion [GO:0005739]; nucleus [GO:0005634]				4	Filtered	3434.46	7172.17	2971.78	3482.07	Filtered	3059.77	6599.99	1645.4	3392.84	Filtered	4809.97	9794.16	1218.83	3528.46	Filtered	1707.15	7008.37	2187.54	3018.33	Filtered	Filtered	5901.76	Filtered	1900.07
1-acyl-sn-glycerol-3-phosphate acyltransferase beta [OS=Homo sapiens];Isoform 2 of 1-acyl-sn-glycerol-3-phosphate acyltransferase beta [OS=Homo sapiens]	O15120;O15120-2	O15120;O15120-2	O15120	SUBCELLULAR LOCATION: Endoplasmic reticulum membrane {ECO:0000269|PubMed:21873652}; Multi-pass membrane protein {ECO:0000269|PubMed:21873652}.	endoplasmic reticulum [GO:0005783]; endoplasmic reticulum membrane [GO:0005789]; integral component of membrane [GO:0016021]; plasma membrane [GO:0005886]; specific granule membrane [GO:0035579]			3		31253.4	9802.07	10003	11850.8	10499.3	15832.4	11436.4	15615.8	11605.7	10796.3	12228.4	12050.1	15238.6	10764.1	13922.1	16559.7	8268.55	19882	10644.2	8514.21	18894.5	10619.7	15310.5	14102.4	17286.7
Secretory carrier-associated membrane protein 2 [OS=Homo sapiens]	O15127	O15127	O15127	SUBCELLULAR LOCATION: Golgi apparatus, trans-Golgi network membrane {ECO:0000269|PubMed:15840657}; Multi-pass membrane protein {ECO:0000269|PubMed:15840657}. Recycling endosome membrane {ECO:0000269|PubMed:15840657}; Multi-pass membrane protein {ECO:0000269|PubMed:15840657}.	extracellular exosome [GO:0070062]; Golgi apparatus [GO:0005794]; Golgi membrane [GO:0000139]; integral component of membrane [GO:0016021]; intracellular membrane-bounded organelle [GO:0043231]; recycling endosome membrane [GO:0055038]; trans-Golgi network membrane [GO:0032588]; transport vesicle [GO:0030133]			3		17444.7	9407.34	8128.6	4852.88	6241.75	19934.6	22433.7	8171.08	7310.84	7446.9	24563.2	17217.4	6910.9	8263.5	7336.02	12209.3	8047.35	7311.16	7437.07	4655.67	14485.9	26669.1	8670.95	4617.26	4336.09
Actin-related protein 2/3 complex subunit 1B [OS=Homo sapiens]	O15143	O15143	O15143	SUBCELLULAR LOCATION: Cytoplasm, cytoskeleton {ECO:0000269|PubMed:11741539, ECO:0000269|PubMed:9230079}. Nucleus {ECO:0000269|PubMed:29925947}.	actin cytoskeleton [GO:0015629]; Arp2/3 protein complex [GO:0005885]; cytosol [GO:0005829]; extracellular exosome [GO:0070062]; focal adhesion [GO:0005925]; nucleus [GO:0005634]; tubulobulbar complex [GO:0036284]		2		4	45580.6	25513.6	27290.8	21581.2	22455.1	28725.8	33352.2	28354.6	23348.5	26352.5	35477.2	27477.3	27162.7	27560.5	22420.7	34144.8	37631.1	27851.8	24756.2	24518.1	44464.3	46510.9	48363.9	30805.6	30870
Actin-related protein 2/3 complex subunit 2 [OS=Homo sapiens]	O15144	O15144	O15144	SUBCELLULAR LOCATION: Cytoplasm, cytoskeleton {ECO:0000269|PubMed:9230079}. Cell projection {ECO:0000269|PubMed:9230079}. Cell junction, synapse, synaptosome {ECO:0000250|UniProtKB:Q9CVB6}. Nucleus {ECO:0000269|PubMed:29925947}.	actin cytoskeleton [GO:0015629]; Arp2/3 protein complex [GO:0005885]; cytosol [GO:0005829]; endosome [GO:0005768]; extracellular exosome [GO:0070062]; focal adhesion [GO:0005925]; glutamatergic synapse [GO:0098978]; lamellipodium [GO:0030027]; muscle cell projection membrane [GO:0036195]; neuron projection [GO:0043005]; nucleus [GO:0005634]; site of double-strand break [GO:0035861]		2	3	4	34521	41083.4	35414.8	31295.2	31831.7	58522.4	54384	31468.9	29757.7	34851.9	43254	41490.1	32528.6	40636.7	35666.2	42467.8	44050.5	31949.9	34494.5	33448.3	52563.6	76210.7	49119	37814.4	36293.4
Actin-related protein 2/3 complex subunit 3 [OS=Homo sapiens]	O15145	O15145	O15145	SUBCELLULAR LOCATION: Cytoplasm, cytoskeleton {ECO:0000269|PubMed:9230079, ECO:0000269|PubMed:9359840}. Cell projection {ECO:0000269|PubMed:9230079, ECO:0000269|PubMed:9359840}. Nucleus {ECO:0000269|PubMed:29925947}.	actin cytoskeleton [GO:0015629]; Arp2/3 protein complex [GO:0005885]; cytosol [GO:0005829]; extracellular exosome [GO:0070062]; filamentous actin [GO:0031941]; focal adhesion [GO:0005925]; growth cone leading edge [GO:0061850]; lamellipodium [GO:0030027]; membrane [GO:0016020]; nucleus [GO:0005634]; site of double-strand break [GO:0035861]		2	3	4	41550.1	11910.7	13010	37558.5	42412.8	99254.5	16414.6	13561.3	35100.4	42898.1	59476.1	13537.6	13810.3	62538.5	40528.8	65465.7	16818.3	15149.8	43661	41839	139417	18708.8	14822	49596.3	42130
phospholipid scramblase 1 [OS=Homo sapiens];Isoform 2 of Phospholipid scramblase 1 [OS=Homo sapiens]	O15162;O15162-2	O15162;O15162-2	O15162	SUBCELLULAR LOCATION: Cell membrane {ECO:0000269|PubMed:22052202}; Single-pass type II membrane protein. Membrane; Lipid-anchor; Cytoplasmic side. Nucleus. Cytoplasm {ECO:0000269|PubMed:22052202}. Cytoplasm, perinuclear region {ECO:0000269|PubMed:22052202}. Note=Localizes to the perinuclear region in the presence of RELT. {ECO:0000269|PubMed:22052202}.	collagen-containing extracellular matrix [GO:0062023]; cytoplasm [GO:0005737]; cytosol [GO:0005829]; extracellular exosome [GO:0070062]; Golgi apparatus [GO:0005794]; integral component of plasma membrane [GO:0005887]; membrane [GO:0016020]; membrane raft [GO:0045121]; nucleolus [GO:0005730]; nucleus [GO:0005634]; perinuclear region of cytoplasm [GO:0048471]; plasma membrane [GO:0005886]		2	3	4	2739.38	4715.14	7299.92	10289.9	5681.44	Filtered	4142.44	8564.57	35359.1	22285.2	2157.59	6870.08	7538.11	126561	5943.68	3846.38	718.512	10736.2	9722.37	6148.84	9171.93	139610	13393.9	14765.1	10160.9
Membrane-associated progesterone receptor component 2 [OS=Homo sapiens];Isoform 2 of Membrane-associated progesterone receptor component 2 [OS=Homo sapiens]	O15173;O15173-2	O15173;O15173-2	O15173	SUBCELLULAR LOCATION: Membrane {ECO:0000305}; Single-pass membrane protein {ECO:0000305}.	integral component of membrane [GO:0016021]; membrane [GO:0016020]; nuclear envelope [GO:0005635]			3	4	88786.3	44016.3	31067.5	117898	127626	79556.1	58613.8	29632.3	137983	125895	157280	49743	28725.8	161787	139892	128093	54328.4	31875.9	118417	98214.5	157852	149204	35773	115858	97637.6
Ral guanine nucleotide dissociation stimulator-like 2 [OS=Homo sapiens];Isoform 2 of Ral guanine nucleotide dissociation stimulator-like 2 [OS=Homo sapiens]	O15211;O15211-2	O15211;O15211-2	O15211	0	0					5400.04	5155.36	Filtered	25159.1	16546.9	Filtered	Filtered	Filtered	21380.7	14325.2	10758.7	Filtered	Filtered	38785.4	22363.9	24055.6	Filtered	Filtered	49624.7	28595.4	Filtered	Filtered	Filtered	20657.6	21978.8
Prefoldin subunit 6 [OS=Homo sapiens]	O15212	O15212	O15212	0	cytoplasm [GO:0005737]; prefoldin complex [GO:0016272]		2			12232.6	33296.6	18505	19493.6	24004	Filtered	22999.1	15931.6	18492.7	18152.1	Filtered	16225.5	17467.5	21381.1	15088.3	15026.4	26951.9	19619	19915.2	13738.7	30604.7	24439.8	23620.4	19910.5	21512.9
Glutathione S-transferase A4 [OS=Homo sapiens];Isoform 2 of Glutathione S-transferase A4 [OS=Homo sapiens]	O15217;O15217-2	O15217;O15217-2	O15217	SUBCELLULAR LOCATION: Cytoplasm.	cytosol [GO:0005829]		2			8521.03	179576	5255.5	99598.3	94385.2	Filtered	314098	Filtered	62624.7	61502.4	5286.93	168141	Filtered	113413	73696.7	3977.89	88450.7	Filtered	40284.5	49586.9	Filtered	111918	Filtered	19637.9	18515
Dihydroxyacetone phosphate acyltransferase [OS=Homo sapiens];Isoform 2 of Dihydroxyacetone phosphate acyltransferase [OS=Homo sapiens]	O15228;O15228-2	O15228;O15228-2	O15228	SUBCELLULAR LOCATION: Peroxisome membrane {ECO:0000250}; Peripheral membrane protein {ECO:0000250}; Matrix side {ECO:0000250}. Note=Exclusively localized to the lumenal side of the peroxisomal membrane. {ECO:0000250}.	cytosol [GO:0005829]; membrane [GO:0016020]; mitochondrial membrane [GO:0031966]; peroxisomal matrix [GO:0005782]; peroxisomal membrane [GO:0005778]; peroxisome [GO:0005777]		2	3		Filtered	5545.36	4598.3	2765.38	3672.36	Filtered	11550.4	4420.72	1936.96	2987.29	Filtered	2856.29	4077.58	2566.8	3305.39	Filtered	3145.27	5628.62	2595.44	3067.39	Filtered	1884.43	2558.12	2534.35	2231.13
Kynurenine 3-monooxygenase [OS=Homo sapiens]	O15229	O15229	O15229	SUBCELLULAR LOCATION: Mitochondrion outer membrane {ECO:0000255|HAMAP-Rule:MF_03018, ECO:0000269|PubMed:9237672}; Multi-pass membrane protein {ECO:0000255|HAMAP-Rule:MF_03018, ECO:0000269|PubMed:9237672}.	cytosol [GO:0005829]; extracellular space [GO:0005615]; integral component of membrane [GO:0016021]; mitochondrial outer membrane [GO:0005741]; mitochondrion [GO:0005739]	1	2	3		52328.1	31683	24732.4	34380.2	31321.9	65267.2	51986.4	29841.9	34980.5	34113.1	54909.9	39837.8	31079.3	37196.2	33796.1	39820.3	38502.4	31811.8	38551.4	38377.6	45128.8	65422.2	29817.9	29438.7	32057.2
Laminin subunit alpha-5 [OS=Homo sapiens]	O15230	O15230	O15230	SUBCELLULAR LOCATION: Secreted, extracellular space, extracellular matrix, basement membrane. Note=Major component.	basement membrane [GO:0005604]; collagen-containing extracellular matrix [GO:0062023]; extracellular exosome [GO:0070062]; extracellular region [GO:0005576]; extracellular space [GO:0005615]; laminin-10 complex [GO:0043259]; laminin-11 complex [GO:0043260]; laminin-5 complex [GO:0005610]; neuromuscular junction [GO:0031594]; nucleus [GO:0005634]; synaptic cleft [GO:0043083]	1		3	4	8574.8	3095.28	7573.57	3397.08	8944.72	7138.52	4576.95	5528.12	2519.7	5262.8	1899.66	5258.23	5282.75	5318.64	5586.92	7770.38	3072.03	5766.94	4489.19	7522.83	17517	8256.91	7689.79	5146.01	6625.98
NADH dehydrogenase [ubiquinone] 1 alpha subcomplex subunit 1 [OS=Homo sapiens]	O15239	O15239	O15239	SUBCELLULAR LOCATION: Mitochondrion inner membrane {ECO:0000305|PubMed:12611891}; Single-pass membrane protein {ECO:0000255}; Matrix side {ECO:0000305}.	cytosol [GO:0005829]; integral component of membrane [GO:0016021]; mitochondrial inner membrane [GO:0005743]; mitochondrial membrane [GO:0031966]; mitochondrial respiratory chain complex I [GO:0005747]; mitochondrion [GO:0005739]		2	3		1667.61	3951.71	3287.8	2560.04	Filtered	Filtered	Filtered	4633.47	3995.08	2141.15	Filtered	3787.83	3896.98	4851.56	1724.54	Filtered	5179.24	3780.42	9061.24	5937.49	5300.8	Filtered	2472.62	3913.48	4461.88
Solute carrier family 22 member 1 [OS=Homo sapiens];Isoform 2 of Solute carrier family 22 member 1 [OS=Homo sapiens];Isoform 3 of Solute carrier family 22 member 1 [OS=Homo sapiens];Isoform 4 of Solute carrier family 22 member 1 [OS=Homo sapiens]	O15245-1;O15245-2;O15245-3;O15245-4	O15245-1;O15245-2;O15245-3;O15245-4	O15245	SUBCELLULAR LOCATION: Basolateral cell membrane {ECO:0000269|PubMed:16263091}; Multi-pass membrane protein {ECO:0000269|PubMed:16263091}.	basolateral plasma membrane [GO:0016323]; integral component of plasma membrane [GO:0005887]; membrane [GO:0016020]; plasma membrane [GO:0005886]			3		37925.8	41526.4	42170.2	64333.5	73934.8	18240.4	63086.1	40164.9	35974.3	47365.2	24427.6	44218.1	42283.7	45856.6	53532.1	34201.5	46123.4	43492.5	42299.4	51060.9	14796.6	40018.2	8837.98	19780.4	36984.3
Peroxisomal acyl-coenzyme A oxidase 3 [OS=Homo sapiens];Isoform 2 of Peroxisomal acyl-coenzyme A oxidase 3 [OS=Homo sapiens]	O15254;O15254-2	O15254;O15254-2	O15254	SUBCELLULAR LOCATION: Peroxisome {ECO:0000305}.	cytosol [GO:0005829]; membrane [GO:0016020]; peroxisomal matrix [GO:0005782]; peroxisome [GO:0005777]		2	3		9835.12	14938	14627.5	16281.8	18875.5	11507.7	21499.4	14046.7	16258.5	16911.8	8532.53	17166.8	14505	16197.3	18603.7	14291.5	17022.9	11416.5	16226.9	16974.6	29248.4	22351.1	16868	19941.4	16918.8
Protein RER1 [OS=Homo sapiens]	O15258	O15258	O15258	SUBCELLULAR LOCATION: Golgi apparatus membrane; Multi-pass membrane protein.	cell surface [GO:0009986]; endoplasmic reticulum [GO:0005783]; endoplasmic reticulum-Golgi intermediate compartment [GO:0005793]; Golgi apparatus [GO:0005794]; integral component of Golgi membrane [GO:0030173]; plasma membrane [GO:0005886]			3		Filtered	10150.2	24440.7	15494	15068.2	Filtered	35738.4	22999	19815.7	14199.2	Filtered	19859.6	20601.5	17190.6	18215.2	Filtered	18550.5	22400.3	12168.8	13091.8	Filtered	24667.5	23856.4	18219.3	13636
surfeit locus protein 4 [OS=Homo sapiens]	O15260-1	O15260-1	O15260	SUBCELLULAR LOCATION: Endoplasmic reticulum membrane {ECO:0000269|PubMed:15308636, ECO:0000269|PubMed:18287528}; Multi-pass membrane protein {ECO:0000255}. Endoplasmic reticulum-Golgi intermediate compartment membrane {ECO:0000269|PubMed:18287528}; Multi-pass membrane protein {ECO:0000255}. Golgi apparatus membrane {ECO:0000269|PubMed:18287528}; Multi-pass membrane protein {ECO:0000255}. Note=Cyc…	azurophil granule membrane [GO:0035577]; cytosol [GO:0005829]; endoplasmic reticulum-Golgi intermediate compartment [GO:0005793]; endoplasmic reticulum-Golgi intermediate compartment membrane [GO:0033116]; endoplasmic reticulum membrane [GO:0005789]; Golgi membrane [GO:0000139]; integral component of membrane [GO:0016021]; plasma membrane [GO:0005886]; transport vesicle [GO:0030133]		2	3		66143.4	26850.3	46370.7	13629.6	13586.7	77142.9	47149.7	42902.7	9308.14	14440.7	48222.2	25896.8	38685.4	10907.1	16143.8	45832.3	23015.7	42819.6	9202.21	13985.2	93919	28353.4	33269.3	12077	10594.9
serine palmitoyltransferase 1 [OS=Homo sapiens]	O15269	O15269	O15269	SUBCELLULAR LOCATION: Endoplasmic reticulum membrane {ECO:0000250|UniProtKB:O35704}; Single-pass membrane protein {ECO:0000250|UniProtKB:O35704}.	endoplasmic reticulum [GO:0005783]; endoplasmic reticulum membrane [GO:0005789]; integral component of membrane [GO:0016021]; serine C-palmitoyltransferase complex [GO:0017059]; SPOTS complex [GO:0035339]			3		Filtered	Filtered	Filtered	5463.19	5639.98	Filtered	Filtered	3924.1	5958.17	4746.93	Filtered	4044.76	Filtered	5800.28	4921.98	Filtered	3396.77	10283.6	5460.35	4607.26	Filtered	Filtered	3030.36	2976.55	5729.93
Phosphomannomutase 2 [OS=Homo sapiens]	O15305	O15305	O15305	SUBCELLULAR LOCATION: Cytoplasm.	cytosol [GO:0005829]; neuronal cell body [GO:0043025]; nucleus [GO:0005634]		2		4	9272.76	14379.4	25370.2	20540.5	24229.7	25244.3	25284.8	20340.6	20150.5	19052.4	Filtered	29353.1	23921.6	19042.2	24025.1	15125.4	13866.1	22850	18454.3	17381.4	15889.3	39246.4	23503.2	18007.5	19495.5
Transmembrane 9 superfamily member 1 [OS=Homo sapiens];Isoform 2 of Transmembrane 9 superfamily member 1 [OS=Homo sapiens]	O15321-1;O15321-2	O15321-1;O15321-2	O15321	SUBCELLULAR LOCATION: Lysosome membrane {ECO:0000269|PubMed:19029833}; Multi-pass membrane protein {ECO:0000269|PubMed:19029833}. Cytoplasmic vesicle, autophagosome membrane {ECO:0000269|PubMed:19029833}; Multi-pass membrane protein {ECO:0000269|PubMed:19029833}.	autophagosome membrane [GO:0000421]; cytoplasmic vesicle [GO:0031410]; integral component of membrane [GO:0016021]; lysosomal membrane [GO:0005765]; membrane [GO:0016020]		2	3		Filtered	Filtered	6204.8	2229.37	Filtered	Filtered	Filtered	7114.33	Filtered	2304.9	Filtered	Filtered	6235.2	Filtered	Filtered	Filtered	Filtered	6239.07	2359.14	3431.42	4160.13	Filtered	6326.49	2265.67	3332.78
High mobility group protein B3 [OS=Homo sapiens]	O15347	O15347	O15347	SUBCELLULAR LOCATION: Nucleus {ECO:0000250|UniProtKB:P40618, ECO:0000255|PROSITE-ProRule:PRU00267}. Chromosome {ECO:0000305}. Cytoplasm {ECO:0000250|UniProtKB:O54879}.	cytoplasm [GO:0005737]; nuclear chromatin [GO:0000790]		2		4	23740.6	21112.1	16273	29373.1	20444.7	24568.2	30000.3	16738.6	20392.5	22022.3	47867.9	20865.8	16412.6	19057.4	22317.3	22213.6	21216.2	19541.2	21098.5	22159.4	46465.8	46903.5	22644.3	27687.9	21971.1
Eukaryotic translation initiation factor 3 subunit D [OS=Homo sapiens];Isoform 2 of Eukaryotic translation initiation factor 3 subunit D [OS=Homo sapiens];Isoform 3 of Eukaryotic translation initiation factor 3 subunit D [OS=Homo sapiens]	O15371;O15371-2;O15371-3	O15371;O15371-2;O15371-3	O15371	SUBCELLULAR LOCATION: Cytoplasm {ECO:0000255|HAMAP-Rule:MF_03003}.	cytosol [GO:0005829]; eukaryotic 43S preinitiation complex [GO:0016282]; eukaryotic 48S preinitiation complex [GO:0033290]; eukaryotic translation initiation factor 3 complex [GO:0005852]; eukaryotic translation initiation factor 3 complex, eIF3m [GO:0071541]; membrane [GO:0016020]		2	3		14424.7	27926.5	26054.1	23636.5	26071.4	22666.3	27960.6	23355.3	21537.9	22278	17061.7	21091	24419.4	20039.4	27174.4	16807.9	20150.5	21209.3	21392.6	21488.6	8017.06	35611.5	23520.5	25920.7	23726.5
Eukaryotic translation initiation factor 3 subunit H [OS=Homo sapiens]	O15372	O15372	O15372	SUBCELLULAR LOCATION: Cytoplasm {ECO:0000255|HAMAP-Rule:MF_03007}.	cytosol [GO:0005829]; eukaryotic 43S preinitiation complex [GO:0016282]; eukaryotic 48S preinitiation complex [GO:0033290]; eukaryotic translation initiation factor 3 complex [GO:0005852]; eukaryotic translation initiation factor 3 complex, eIF3m [GO:0071541]; extracellular exosome [GO:0070062]; membrane [GO:0016020]; polysomal ribosome [GO:0042788]		2	3		7561.45	9986.13	13211.8	9194.3	8553.97	3173.27	16626.4	13724.8	7912.7	8189.99	6093.34	12998.8	12674	8029.73	9567.94	9526.81	12341.6	11074.7	9178.59	7542.96	9957.52	12229.8	10864.6	7819.73	7543.45
Importin-8 [OS=Homo sapiens];Isoform 2 of Importin-8 [OS=Homo sapiens]	O15397-1;O15397-2	O15397-1;O15397-2	O15397	SUBCELLULAR LOCATION: Cytoplasm {ECO:0000250}. Nucleus {ECO:0000250}.	cytosol [GO:0005829]; nuclear envelope [GO:0005635]; nucleoplasm [GO:0005654]		2		4	Filtered	Filtered	651.552	Filtered	Filtered	Filtered	Filtered	349.295	Filtered	Filtered	Filtered	Filtered	437.364	Filtered	Filtered	Filtered	Filtered	Filtered	782.702	Filtered	Filtered	Filtered	437.396	Filtered	Filtered
Syntaxin-7 [OS=Homo sapiens];Isoform 2 of Syntaxin-7 [OS=Homo sapiens]	O15400;O15400-2	O15400;O15400-2	O15400	SUBCELLULAR LOCATION: Early endosome membrane {ECO:0000250}; Single-pass type IV membrane protein {ECO:0000250}.	azurophil granule [GO:0042582]; early endosome [GO:0005769]; early endosome membrane [GO:0031901]; endocytic vesicle [GO:0030139]; endomembrane system [GO:0012505]; endosome [GO:0005768]; extracellular exosome [GO:0070062]; immunological synapse [GO:0001772]; integral component of membrane [GO:0016021]; late endosome [GO:0005770]; lysosomal membrane [GO:0005765]; lysosome [GO:0005764]; perinuclea…		2	3	4	21035.4	26381.3	21451.7	36069.6	44019.5	Filtered	39072	26522.1	32284.9	38095.4	18466.3	35141.5	27412.5	36943.1	36498.7	38190.1	43269.5	28524.1	40690.7	36744.9	60217.5	66758.9	37090.8	48533.3	42954.5
High affinity copper uptake protein 1 [OS=Homo sapiens]	O15431	O15431	O15431	SUBCELLULAR LOCATION: Cell membrane; Multi-pass membrane protein. Note=Localizes to the apical membrane in intestinal epithelial cells. {ECO:0000250}.	integral component of plasma membrane [GO:0005887]; late endosome [GO:0005770]; neuronal cell body [GO:0043025]; plasma membrane [GO:0005886]; recycling endosome [GO:0055037]			3		Filtered	2983.27	3059.55	2746.05	Filtered	Filtered	3207.69	4038.79	5129.22	Filtered	Filtered	3016.8	3005.91	3830.58	Filtered	Filtered	Filtered	2900.9	4726	Filtered	Filtered	4705.68	2764.52	2721.44	2486.81
Canalicular multispecific organic anion transporter 2 [OS=Homo sapiens];Isoform 4 of Canalicular multispecific organic anion transporter 2 [OS=Homo sapiens]	O15438-1;O15438-4	O15438-1;O15438-4	O15438	SUBCELLULAR LOCATION: Membrane; Multi-pass membrane protein.	integral component of plasma membrane [GO:0005887]; membrane [GO:0016020]; plasma membrane [GO:0005886]; vacuolar membrane [GO:0005774]			3		9120.79	6092.41	14078.2	9378.39	13039.1	10559.6	5786.36	15161.2	9204.99	15107.2	10015	9640.97	14442.5	5340.24	15214.5	13389.3	4123.31	14959.4	11013.4	13755.3	19074.9	8605.46	15256.5	14506.4	16527.2
calpain-5 [OS=Homo sapiens]	O15484	O15484	O15484	0	cell surface [GO:0009986]; cytoplasm [GO:0005737]; extracellular exosome [GO:0070062]; focal adhesion [GO:0005925]		2			Filtered	6930.75	4781.62	7687.49	8073.98	5006.69	9911.28	4921.82	10228.8	9172.89	12752.9	8960.67	6801.79	6970.61	1335.92	7405.17	Filtered	8552.58	Filtered	7722.43	Filtered	10029	9359.43	Filtered	Filtered
Glycogenin-2 [OS=Homo sapiens];Isoform Beta of Glycogenin-2 [OS=Homo sapiens];Isoform Gamma of Glycogenin-2 [OS=Homo sapiens];Isoform Delta of Glycogenin-2 [OS=Homo sapiens];Isoform Epsilon of Glycogenin-2 [OS=Homo sapiens];Isoform Zeta of Glycogenin-2 [OS=Homo sapiens]	O15488-1;O15488-2;O15488-3;O15488-4;O15488-5;O15488-6	O15488-1;O15488-2;O15488-3;O15488-4;O15488-5;O15488-6	O15488	0	cytosol [GO:0005829]		2			2698.98	11105	8059.64	3384.07	5318.55	Filtered	27812.1	10585	3504.49	3893.28	Filtered	11714.4	11029.2	10835.1	3771.21	Filtered	10462.6	12300.1	3810	3816.83	Filtered	41744.7	22427.2	4625.71	7442.75
Synaptobrevin homolog YKT6 [OS=Homo sapiens]	O15498	O15498	O15498	SUBCELLULAR LOCATION: Cytoplasm, cytosol. Cytoplasmic vesicle membrane; Lipid-anchor; Cytoplasmic side. Golgi apparatus membrane; Lipid-anchor; Cytoplasmic side. Note=Probably cycles through vesicles between Golgi and endosomes.	apical dendrite [GO:0097440]; basal dendrite [GO:0097441]; cytoplasm [GO:0005737]; cytoplasmic vesicle membrane [GO:0030659]; cytosol [GO:0005829]; endoplasmic reticulum [GO:0005783]; endoplasmic reticulum-Golgi intermediate compartment membrane [GO:0033116]; endosome [GO:0005768]; Golgi apparatus [GO:0005794]; Golgi membrane [GO:0000139]; integral component of plasma membrane [GO:0005887]; mitoc…		2	3		10316.3	7299.21	6985.47	9051.16	12359.8	Filtered	11290	6212.33	7717.59	9455.49	13412.9	8363.42	7170.39	11193.5	11977.8	10498.1	10406.9	6386.23	9766.47	10058.2	10339.3	15686.8	7436.39	11395.1	10723.1
Actin-related protein 2/3 complex subunit 5 [OS=Homo sapiens]	O15511-1	O15511-1	O15511	SUBCELLULAR LOCATION: Cytoplasm, cytoskeleton {ECO:0000269|PubMed:9230079}. Cell projection {ECO:0000269|PubMed:9230079}. Nucleus {ECO:0000269|PubMed:29925947}.	actin cytoskeleton [GO:0015629]; Arp2/3 protein complex [GO:0005885]; cytoplasm [GO:0005737]; cytosol [GO:0005829]; endosome [GO:0005768]; extracellular exosome [GO:0070062]; extracellular region [GO:0005576]; ficolin-1-rich granule lumen [GO:1904813]; focal adhesion [GO:0005925]; growth cone [GO:0030426]; lamellipodium [GO:0030027]; nucleus [GO:0005634]; secretory granule lumen [GO:0034774]; sit…		2		4	134302	127017	69202.5	92101.2	128590	263296	219961	68038.2	83470	100977	268847	119314	67908.5	151599	81831.7	274325	136258	71812.7	98552	102506	415446	318763	99290.4	101617	100413
Tapasin [OS=Homo sapiens];Isoform 2 of Tapasin [OS=Homo sapiens];Isoform 3 of Tapasin [OS=Homo sapiens]	O15533-1;O15533-2;O15533-3	O15533-1;O15533-2;O15533-3	O15533	SUBCELLULAR LOCATION: Endoplasmic reticulum membrane {ECO:0000305}; Single-pass type I membrane protein {ECO:0000305}.	endoplasmic reticulum [GO:0005783]; endoplasmic reticulum-Golgi intermediate compartment membrane [GO:0033116]; endoplasmic reticulum membrane [GO:0005789]; Golgi membrane [GO:0000139]; integral component of lumenal side of endoplasmic reticulum membrane [GO:0071556]; integral component of membrane [GO:0016021]; MHC class I peptide loading complex [GO:0042824]; phagocytic vesicle membrane [GO:003…			3		12202.6	3333.98	14816.2	11990.5	7578.19	18915	5176.74	15653.5	12031.7	10209.2	16083	8374.09	14759.9	10237.7	10184.5	18565.9	8229.53	11626.2	13088.7	14174	45403.2	6626.85	20458.9	21134.8	15180.8
Pre-mRNA-splicing factor ATP-dependent RNA helicase DHX15 [OS=Homo sapiens]	O43143	O43143	O43143	SUBCELLULAR LOCATION: Nucleus. Nucleus, nucleolus.	nuclear speck [GO:0016607]; nucleolus [GO:0005730]; nucleoplasm [GO:0005654]; nucleus [GO:0005634]; U12-type spliceosomal complex [GO:0005689]				4	12111.8	12913.8	18806.6	11617.2	25824.2	22706.7	16919.8	20417.3	15440.2	25265	8745.2	16345	19882.9	9792.33	24373.9	19555.1	11957.3	18176	11158.9	23621.8	27579.7	19305.9	25631.8	17115.1	17251.1
Zinc finger ZZ-type and EF-hand domain-containing protein 1 [OS=Homo sapiens]	O43149	O43149	O43149	0	0					Filtered	Filtered	3525.49	1520.2	1783.54	Filtered	Filtered	2835.48	1697.23	1704.29	Filtered	Filtered	2728.9	Filtered	1516.68	Filtered	1837.33	3722.19	1869.77	2098.18	Filtered	Filtered	3351.08	2059.63	1529.8
Plexin-B1 [OS=Homo sapiens];Isoform 2 of Plexin-B1 [OS=Homo sapiens]	O43157;O43157-2	O43157;O43157-2	O43157	SUBCELLULAR LOCATION: Isoform 1: Cell membrane {ECO:0000269|PubMed:12533544}; Single-pass type I membrane protein {ECO:0000255}.; SUBCELLULAR LOCATION: Isoform 2: Secreted {ECO:0000269|PubMed:10520995}.; SUBCELLULAR LOCATION: Isoform 3: Secreted {ECO:0000269|PubMed:10520995}.	extracellular region [GO:0005576]; integral component of plasma membrane [GO:0005887]; plasma membrane [GO:0005886]; semaphorin receptor complex [GO:0002116]			3		Filtered	1745.17	2286.34	Filtered	Filtered	Filtered	Filtered	1922.95	Filtered	Filtered	Filtered	1892.59	2009.91	Filtered	Filtered	Filtered	2200.01	1978.94	2595.69	Filtered	Filtered	Filtered	1120.43	Filtered	Filtered
Cytochrome b5 type B [OS=Homo sapiens]	O43169	O43169	O43169	SUBCELLULAR LOCATION: Mitochondrion outer membrane {ECO:0000250|UniProtKB:P04166}.	integral component of membrane [GO:0016021]; membrane [GO:0016020]; mitochondrial outer membrane [GO:0005741]			3		19499.1	35593.8	40233.3	23073	20128.2	29261.2	69118.9	42816.8	26509.3	20589.4	43511.2	40693.8	44161.3	28508.3	18213.8	23778.6	44297.1	46175.7	23879.6	17993.6	24740.6	57125.8	23056.7	17655.3	18311.5
D-3-phosphoglycerate dehydrogenase [OS=Homo sapiens]	O43175	O43175	O43175	0	cytosol [GO:0005829]; extracellular exosome [GO:0070062]		2			144603	147328	230525	274917	307993	341214	192430	205978	190962	275739	277752	196135	197416	184212	287349	305603	160211	206844	214711	257841	327513	207187	168332	239167	237740
NADH dehydrogenase [ubiquinone] iron-sulfur protein 4, mitochondrial [OS=Homo sapiens]	O43181	O43181	O43181	SUBCELLULAR LOCATION: Mitochondrion inner membrane {ECO:0000269|PubMed:12611891}; Peripheral membrane protein {ECO:0000269|PubMed:12611891}; Matrix side {ECO:0000269|PubMed:12611891}.	mitochondrial inner membrane [GO:0005743]; mitochondrial respiratory chain complex I [GO:0005747]; mitochondrion [GO:0005739]			3		13979.6	31309.6	28656.5	14887.8	9586.38	Filtered	50536.9	25889.9	15552.3	11562.6	5848.51	36309.5	25177.8	20960.1	11228.5	8478.85	32627.6	22509.7	16327.2	9277.24	7879.82	41896	18626.5	9275.14	10691.8
Cytoplasmic dynein 1 light intermediate chain 2 [OS=Homo sapiens]	O43237	O43237	O43237	SUBCELLULAR LOCATION: Cytoplasm, cytoskeleton {ECO:0000250}.	centrosome [GO:0005813]; cytoplasmic dynein complex [GO:0005868]; cytosol [GO:0005829]; kinetochore [GO:0000776]; late endosome [GO:0005770]; lysosome [GO:0005764]; membrane [GO:0016020]; microtubule [GO:0005874]		2	3		Filtered	2085.42	19004.6	4521.93	7490.56	6943.56	5507.98	10366.8	4931.68	5823.65	2872.73	6036.7	5109.27	2277.96	6178.95	3059.28	2467.99	9897.27	4437.57	5329.62	7377.75	5633.5	9272.95	5284.93	5930.64
26S proteasome non-ATPase regulatory subunit 3 [OS=Homo sapiens]	O43242	O43242	O43242	0	cytosol [GO:0005829]; extracellular exosome [GO:0070062]; extracellular region [GO:0005576]; ficolin-1-rich granule lumen [GO:1904813]; membrane [GO:0016020]; nucleoplasm [GO:0005654]; nucleus [GO:0005634]; proteasome accessory complex [GO:0022624]; proteasome complex [GO:0000502]; proteasome regulatory particle, lid subcomplex [GO:0008541]; secretory granule lumen [GO:0034774]		2	3	4	7779.79	9679.03	14782.5	10758.9	20596.3	25174.2	15598.2	14023.1	9268.28	12092.4	17837.2	10844.4	14097.2	8652.15	12486.3	12080.9	11621.2	13918.5	11045.2	14258.8	14950	13729.2	14612.1	11668.3	13032.3
bifunctional 3'-phosphoadenosine 5'-phosphosulfate synthase 1 [OS=Homo sapiens]	O43252	O43252	O43252	0	cytosol [GO:0005829]		2			Filtered	Filtered	2085.08	Filtered	2409.03	Filtered	Filtered	2403.12	Filtered	2746.72	Filtered	Filtered	1900.69	Filtered	Filtered	Filtered	Filtered	1637	Filtered	3007.86	Filtered	Filtered	2942.6	3296.33	2630.51
Centromere/kinetochore protein zw10 homolog [OS=Homo sapiens];Isoform 2 of Centromere/kinetochore protein zw10 homolog [OS=Homo sapiens]	O43264;O43264-2	O43264;O43264-2	O43264	SUBCELLULAR LOCATION: Cytoplasm {ECO:0000269|PubMed:15029241}. Endoplasmic reticulum membrane {ECO:0000269|PubMed:15029241}; Peripheral membrane protein {ECO:0000269|PubMed:15029241}. Chromosome, centromere, kinetochore {ECO:0000269|PubMed:11590237, ECO:0000269|PubMed:15485811, ECO:0000269|PubMed:15824131}. Cytoplasm, cytoskeleton, spindle {ECO:0000269|PubMed:11590237}. Note=Dynamic pattern of lo…	condensed chromosome kinetochore [GO:0000777]; cytosol [GO:0005829]; Dsl1/NZR complex [GO:0070939]; endoplasmic reticulum [GO:0005783]; endoplasmic reticulum membrane [GO:0005789]; kinetochore [GO:0000776]; kinetochore microtubule [GO:0005828]; membrane [GO:0016020]; nucleus [GO:0005634]; RZZ complex [GO:1990423]; spindle pole [GO:0000922]		2	3	4	Filtered	Filtered	3445.39	Filtered	Filtered	Filtered	Filtered	3014.95	Filtered	1238.99	Filtered	Filtered	3074.4	Filtered	Filtered	Filtered	Filtered	3019.36	1165.91	3058.77	Filtered	Filtered	2692.23	Filtered	Filtered
Proline dehydrogenase 1, mitochondrial [OS=Homo sapiens]	O43272	O43272	O43272	SUBCELLULAR LOCATION: Mitochondrion matrix.	mitochondrial inner membrane [GO:0005743]; mitochondrial matrix [GO:0005759]; mitochondrion [GO:0005739]			3		4271.72	5222.61	7061.87	4726.42	5616.41	20956.2	6455.86	5587.29	4938.15	4195.76	10345.3	5114.83	9702.46	3539.47	5444.26	12151.8	4414.14	10626.8	5838.16	5901.86	Filtered	Filtered	2655.27	2818.47	2641.06
U4/U6.U5 tri-snRNP-associated protein 1 [OS=Homo sapiens]	O43290	O43290	O43290	SUBCELLULAR LOCATION: Nucleus {ECO:0000269|PubMed:11350945, ECO:0000269|PubMed:9449708}. Note=Found in the nucleus of mitogen-activated peripheral blood mononuclear cells (PBMCs), tumor cells, or normal cell lines, but not in normal tissues except testis and fetal liver or in unstimulated PBMCs, suggesting preferential expression in proliferating cells.	Cajal body [GO:0015030]; catalytic step 2 spliceosome [GO:0071013]; cytoplasm [GO:0005737]; cytosol [GO:0005829]; Golgi apparatus [GO:0005794]; nuclear speck [GO:0016607]; nucleoplasm [GO:0005654]; nucleus [GO:0005634]; U2-type precatalytic spliceosome [GO:0071005]; U4/U6 x U5 tri-snRNP complex [GO:0046540]		2		4	2350.34	Filtered	5457.5	2568.65	4007.14	8874.08	Filtered	3345.38	1547.09	3801.78	2511.41	4298.79	4139.93	Filtered	3531.14	4752.13	Filtered	3409.67	2350.44	3985.45	7785.14	5056.73	3288.44	2936.96	3836.95
Transforming growth factor beta-1-induced transcript 1 protein [OS=Homo sapiens]	O43294-1	O43294-1	O43294	SUBCELLULAR LOCATION: Cell junction, focal adhesion. Nucleus matrix. Cytoplasm, cytoskeleton. Note=Associated with the actin cytoskeleton; colocalizes with stress fibers.	cytoplasm [GO:0005737]; cytoskeleton [GO:0005856]; focal adhesion [GO:0005925]; nuclear matrix [GO:0016363]		2		4	6288.36	3797.64	13476.8	8683.23	15691.1	6407.12	8389.05	11169.9	8491.78	14596.5	5894.83	6664.48	9658.62	6342.46	16496.6	10754.1	4899.85	11097.2	15428.6	15175.5	40427.2	17639.2	48579.4	37902.2	26074.7
Aquaporin-9 [OS=Homo sapiens]	O43315	O43315	O43315	SUBCELLULAR LOCATION: Cell membrane {ECO:0000269|PubMed:10564231, ECO:0000269|PubMed:9514918}; Multi-pass membrane protein {ECO:0000305}.	basolateral plasma membrane [GO:0016323]; integral component of membrane [GO:0016021]; integral component of plasma membrane [GO:0005887]; intracellular membrane-bounded organelle [GO:0043231]; plasma membrane [GO:0005886]			3		12329	20115.5	20991.9	30876.6	16012.8	11593.9	16997.3	28002.7	26379.1	20667.6	20029.8	17131.3	24420.2	19037.6	18512.7	21077.3	19787.4	25329.7	25570.6	13661.6	Filtered	Filtered	12397.9	11649.8	7931.08
Eukaryotic translation elongation factor 1 epsilon-1 [OS=Homo sapiens];Isoform 2 of Eukaryotic translation elongation factor 1 epsilon-1 [OS=Homo sapiens]	O43324-1;O43324-2	O43324-1;O43324-2	O43324	SUBCELLULAR LOCATION: Cytoplasm {ECO:0000269|PubMed:15680327}. Cytoplasm, cytosol {ECO:0000269|PubMed:19289464}. Nucleus {ECO:0000269|PubMed:15680327}. Note=Cytoplasmic under growth arrest conditions. Translocated into the nucleus when growth resumes (S phase) and following DNA damage.	aminoacyl-tRNA synthetase multienzyme complex [GO:0017101]; cytoplasm [GO:0005737]; cytosol [GO:0005829]; nucleolus [GO:0005730]; nucleoplasm [GO:0005654]; nucleus [GO:0005634]		2		4	24899.4	14601.6	22347.3	22884.6	18556.6	18190.8	28922.7	14175.3	9897.81	15331.4	30031.8	16866.9	20371.4	22752.7	10565.7	33224.6	11395.7	13961.3	21083.3	20316.1	Filtered	30219	10291.6	12484	23592.9
LYR motif-containing protein 1 [OS=Homo sapiens]	O43325	O43325	O43325	SUBCELLULAR LOCATION: Nucleus {ECO:0000269|PubMed:19022914}.	midbody [GO:0030496]; nucleoplasm [GO:0005654]				4	Filtered	15807.1	9707.23	4500.84	Filtered	Filtered	11107	13398	2854.55	Filtered	Filtered	16325.6	15839.6	4064.97	Filtered	Filtered	16917.7	14516.3	2652.97	4264.87	Filtered	5701.58	13130.2	4396.21	6393.13
Isoform 3 of Heterogeneous nuclear ribonucleoprotein R [OS=Homo sapiens]	O43390-3	O43390-3	O43390	SUBCELLULAR LOCATION: Nucleus {ECO:0000250|UniProtKB:Q7TMK9}. Microsome {ECO:0000250|UniProtKB:Q7TMK9}. Nucleus, nucleoplasm {ECO:0000269|PubMed:17289661}. Cytoplasm {ECO:0000269|PubMed:17289661}. Note=Localized in cytoplasmic mRNP granules containing untranslated mRNAs. The tyrosine phosphorylated form bound to RNA is found in microsomes (By similarity). {ECO:0000250|UniProtKB:Q7TMK9, ECO:000026…	axon terminus [GO:0043679]; catalytic step 2 spliceosome [GO:0071013]; dendrite [GO:0030425]; endoplasmic reticulum [GO:0005783]; growth cone [GO:0030426]; nucleoplasm [GO:0005654]; nucleus [GO:0005634]; ribonucleoprotein complex [GO:1990904]; spliceosomal complex [GO:0005681]				4	26498.2	14244.8	26858.8	30976.2	40222.1	46818.3	16813.7	27006.7	29429.6	40177.8	29351.9	18416.2	25597.9	19262.5	39208.2	28211.9	12812.7	26568.5	34012.9	37256.3	57214.8	21758.1	36245.7	48392.7	33759.8
Thioredoxin-like protein 1 [OS=Homo sapiens]	O43396	O43396	O43396	SUBCELLULAR LOCATION: Cytoplasm {ECO:0000269|PubMed:19349277}. Nucleus {ECO:0000269|PubMed:19349277}. Note=At least 85% of the cellular TXNL1 is proteasome-associated.	cytoplasm [GO:0005737]; cytosol [GO:0005829]; nucleus [GO:0005634]; proteasome complex [GO:0000502]		2		4	60533.7	46636.5	45001.6	48688.7	56765.3	59683.2	72485	43581.3	45164.3	53267.3	59823.9	48561.8	42659.7	51207.9	59399.5	59534.6	51076	45964.9	46498.7	52269.6	61552.7	74228.8	47305.3	52877.1	43430.2
Tumor protein D54 [OS=Homo sapiens];Isoform 5 of Tumor protein D54 [OS=Homo sapiens];Isoform 7 of Tumor protein D54 [OS=Homo sapiens]	O43399;O43399-5;O43399-7	O43399;O43399-5;O43399-7	O43399	0	cytoplasm [GO:0005737]; perinuclear region of cytoplasm [GO:0048471]		2		4	14682	23678.4	24350.5	12568.3	14010.1	28084.3	38962.8	19467.2	13190.1	15092	24319.9	20867.1	22510.4	18903.1	13656.5	26738.2	22280.4	21546.8	12614.2	12905.9	62695.2	48120.8	28428.8	16094.7	13418.1
peptidyl-prolyl cis-trans isomerase H [OS=Homo sapiens]	O43447	O43447	O43447	SUBCELLULAR LOCATION: Nucleus speckle {ECO:0000269|PubMed:9570313}. Cytoplasm {ECO:0000269|PubMed:9570313}. Note=Colocalizes with spliceosomal snRNPs. A small proportion may also be cytoplasmic.	cytoplasm [GO:0005737]; nuclear speck [GO:0016607]; nucleoplasm [GO:0005654]; spliceosomal complex [GO:0005681]; U4/U6 snRNP [GO:0071001]; U4/U6 x U5 tri-snRNP complex [GO:0046540]		2		4	Filtered	3995.96	2432.5	Filtered	Filtered	Filtered	Filtered	2002.42	Filtered	Filtered	Filtered	2819.71	3311.27	1130.5	Filtered	Filtered	2418.55	1176.92	Filtered	Filtered	Filtered	Filtered	2838.28	Filtered	Filtered
Serine protease HTRA2, mitochondrial [OS=Homo sapiens]	O43464	O43464	O43464	SUBCELLULAR LOCATION: Mitochondrion intermembrane space. Mitochondrion membrane {ECO:0000305}; Single-pass membrane protein {ECO:0000305}. Note=Predominantly present in the intermembrane space. Released into the cytosol following apoptotic stimuli, such as UV treatment, and stimulation of mitochondria with caspase-8 truncated BID/tBID.	CD40 receptor complex [GO:0035631]; chromatin [GO:0000785]; cytoplasmic side of plasma membrane [GO:0009898]; cytoskeleton [GO:0005856]; cytosol [GO:0005829]; endoplasmic reticulum [GO:0005783]; endoplasmic reticulum membrane [GO:0005789]; membrane [GO:0016020]; mitochondrial intermembrane space [GO:0005758]; mitochondrial membrane [GO:0031966]; mitochondrion [GO:0005739]; nucleus [GO:0005634]; s…		2	3	4	23782.3	18416.7	11663.6	14186.9	9107.56	16137.6	63213.4	13105.4	8548.72	15243.6	18584.1	22833.4	11371.9	19087.8	11830.5	16421.4	16034.8	16708.2	9480.4	9755.37	40497.3	64597.5	18245.5	25618.2	28049.3
aflatoxin B1 aldehyde reductase member 2 [OS=Homo sapiens]	O43488	O43488	O43488	SUBCELLULAR LOCATION: Golgi apparatus {ECO:0000250}. Cytoplasm {ECO:0000269|PubMed:9576847}.	cytosol [GO:0005829]; extracellular exosome [GO:0070062]; Golgi apparatus [GO:0005794]		2			64912	64193.6	61347.5	64284.4	70500.1	146788	89583.1	41150.6	62588.5	54145.2	99637.1	76602.1	62124.9	83974.1	75152.4	99904.4	69489.4	47436.4	52547.3	49498.3	150208	131654	78154.6	68269.4	52706.9
band 4.1-like protein 2 [OS=Homo sapiens];Isoform 4 of Band 4.1-like protein 2 [OS=Homo sapiens]	O43491-1;O43491-4	O43491-1;O43491-4	O43491	SUBCELLULAR LOCATION: Cytoplasm, cytoskeleton {ECO:0000250}. Cytoplasm, cell cortex {ECO:0000269|PubMed:23870127}. Cell membrane {ECO:0000269|PubMed:22361696}.	cell cortex region [GO:0099738]; cell junction [GO:0030054]; cytosol [GO:0005829]; extracellular exosome [GO:0070062]; focal adhesion [GO:0005925]; nucleoplasm [GO:0005654]; nucleus [GO:0005634]; plasma membrane [GO:0005886]; spectrin [GO:0008091]		2	3	4	Filtered	4016.1	11431.9	6644.91	6926.5	7135.35	6848.26	12608.9	5661.71	7321.6	Filtered	5781.08	9307.71	5236.18	6569.36	11656.2	4314.28	8424.94	7795.97	7361.5	23909.5	18444.4	19221.2	10791	11370
Trans-Golgi network integral membrane protein 2 [OS=Homo sapiens];Isoform TGN46 of Trans-Golgi network integral membrane protein 2 [OS=Homo sapiens];Isoform TGN48 of Trans-Golgi network integral membrane protein 2 [OS=Homo sapiens];Isoform 4 of Trans-Golgi network integral membrane protein 2 [OS=Homo sapiens];Isoform 5 of Trans-Golgi network integral membrane protein 2 [OS=Homo sapiens]	O43493-1;O43493-2;O43493-3;O43493-4;O43493-5	O43493-1;O43493-2;O43493-3;O43493-4;O43493-5	O43493	SUBCELLULAR LOCATION: Cell membrane; Single-pass type I membrane protein. Golgi apparatus, trans-Golgi network membrane; Single-pass type I membrane protein. Note=Primarily in trans-Golgi network. Cycles between the trans-Golgi network and the cell surface returning via endosomes.	clathrin-coated vesicle membrane [GO:0030665]; endoplasmic reticulum lumen [GO:0005788]; endosome [GO:0005768]; Golgi apparatus [GO:0005794]; integral component of membrane [GO:0016021]; nucleoplasm [GO:0005654]; plasma membrane [GO:0005886]; trans-Golgi network [GO:0005802]; trans-Golgi network transport vesicle [GO:0030140]; transport vesicle [GO:0030133]			3	4	Filtered	5158.57	18072	8510	8741.95	Filtered	16671.8	14937.3	7390.54	6196.13	9353.44	8518.9	17057.4	8283.32	7157.96	17129.6	10925	13029.6	7693.6	5706.79	Filtered	12725.7	11561.3	7578.63	6675.09
density-regulated protein [OS=Homo sapiens]	O43583	O43583	O43583	0	0					Filtered	2901.16	6021.35	3440.76	3513.85	Filtered	6435.62	4460.81	2821.7	2822.23	Filtered	4318.98	5361.71	2997.91	3024.77	Filtered	3468.21	4777.65	2857.87	3144.72	Filtered	4064.21	4333.01	2033.45	2852.18
Exportin-T [OS=Homo sapiens]	O43592	O43592	O43592	SUBCELLULAR LOCATION: Nucleus. Cytoplasm. Note=Nuclear, once bound to tRNA and Ran the complex translocates to the cytoplasm. Shuttles between the nucleus and the cytoplasm.	cytoplasm [GO:0005737]; cytosol [GO:0005829]; nuclear matrix [GO:0016363]; nuclear pore [GO:0005643]; nucleoplasm [GO:0005654]		2		4	Filtered	Filtered	4096.27	1892.34	Filtered	Filtered	Filtered	4371.37	Filtered	Filtered	Filtered	1849.53	4803.99	Filtered	2469.46	Filtered	Filtered	4347.07	1772.13	2040.42	Filtered	4883	6644.61	2018.6	Filtered
2'-deoxynucleoside 5'-phosphate N-hydrolase 1 [OS=Homo sapiens]	O43598-1	O43598-1	O43598	SUBCELLULAR LOCATION: Cytoplasm {ECO:0000255|HAMAP-Rule:MF_03036, ECO:0000269|PubMed:18726892}. Nucleus {ECO:0000255|HAMAP-Rule:MF_03036}.	cytosol [GO:0005829]; extracellular exosome [GO:0070062]; nucleus [GO:0005634]		2		4	73289.7	39210.8	37361.8	36176.8	37244.6	70109.6	56594.1	26660.3	37630.2	39080.1	87780.2	33319.3	20061.9	53686.8	40745.1	105741	44556.8	25216.5	49682.4	32730	122501	55819.4	29098.3	38480	38444.5
Mitochondrial import inner membrane translocase subunit TIM44 [OS=Homo sapiens]	O43615	O43615	O43615	SUBCELLULAR LOCATION: Mitochondrion inner membrane {ECO:0000269|PubMed:10339406}; Peripheral membrane protein {ECO:0000269|PubMed:10339406}; Matrix side {ECO:0000269|PubMed:10339406}. Mitochondrion matrix {ECO:0000269|PubMed:10339406}.	mitochondrial inner membrane [GO:0005743]; mitochondrial matrix [GO:0005759]; mitochondrion [GO:0005739]			3		7285.83	7822.33	22929.1	8925.59	8710.48	14277.2	11980.7	19465.8	7164.44	9139.62	6460.95	10849.2	22432.2	5793.54	9906.36	15279.8	8420.06	22164.4	7876.82	8237.88	24085.4	6395.15	23174	9260.86	11429.8
Trafficking protein particle complex subunit 3 [OS=Homo sapiens];Isoform 2 of Trafficking protein particle complex subunit 3 [OS=Homo sapiens]	O43617-1;O43617-2	O43617-1;O43617-2	O43617	SUBCELLULAR LOCATION: Golgi apparatus, cis-Golgi network {ECO:0000250}. Endoplasmic reticulum {ECO:0000250}.	cis-Golgi network membrane [GO:0033106]; cytosol [GO:0005829]; endoplasmic reticulum [GO:0005783]; Golgi apparatus [GO:0005794]; Golgi membrane [GO:0000139]; TRAPP complex [GO:0030008]		2	3		27024.9	48666.7	30888.8	102256	76320.9	41850	75755.8	18354.4	39036.9	63218.4	49734.2	49716.9	33417.7	36865.4	72029	21034.6	20185.6	20796.4	94662.3	75423.6	54124.3	71138	27514	40221	66674.3
BUB3-interacting and GLEBS motif-containing protein ZNF207 [OS=Homo sapiens];Isoform 2 of BUB3-interacting and GLEBS motif-containing protein ZNF207 [OS=Homo sapiens];Isoform 4 of BUB3-interacting and GLEBS motif-containing protein ZNF207 [OS=Homo sapiens]	O43670-1;O43670-2;O43670-4	O43670-1;O43670-2;O43670-4	O43670	SUBCELLULAR LOCATION: Nucleus {ECO:0000269|PubMed:24462186, ECO:0000269|PubMed:24462187}. Chromosome, centromere, kinetochore {ECO:0000269|PubMed:24462186, ECO:0000269|PubMed:24462187}. Cytoplasm, cytoskeleton, spindle {ECO:0000269|PubMed:26388440}. Note=Localizes primarily to the nucleus in interphase, concentrates at kinetochores prior to nuclear envelope breakdown and during early prometaphase…	condensed chromosome kinetochore [GO:0000777]; cytoplasm [GO:0005737]; kinetochore [GO:0000776]; microtubule [GO:0005874]; nucleolus [GO:0005730]; nucleoplasm [GO:0005654]; nucleus [GO:0005634]; spindle [GO:0005819]; spindle matrix [GO:1990047]		2		4	8417.92	21261.8	16817.7	17267.2	18236.6	9840.09	14244.3	13761	12402.8	16433.5	2772.07	13079.8	13140.1	9960.21	17113.1	Filtered	11228.6	14478.2	12943.8	16556.4	803.135	23168	14612.7	14333.8	17793.2
NADH dehydrogenase [ubiquinone] 1 beta subcomplex subunit 5, mitochondrial [OS=Homo sapiens];Isoform 2 of NADH dehydrogenase [ubiquinone] 1 beta subcomplex subunit 5, mitochondrial [OS=Homo sapiens]	O43674-1;O43674-2	O43674-1;O43674-2	O43674	SUBCELLULAR LOCATION: Mitochondrion inner membrane {ECO:0000305|PubMed:12611891}; Single-pass membrane protein {ECO:0000305}; Matrix side {ECO:0000305}.	integral component of membrane [GO:0016021]; mitochondrial inner membrane [GO:0005743]; mitochondrial respiratory chain complex I [GO:0005747]; mitochondrion [GO:0005739]; nucleoplasm [GO:0005654]			3	4	22485.9	13805.1	17759.5	9573.63	5627.56	37192.9	10686.9	8074.66	14643.3	8332.65	34688	12244	7734.05	7468.62	9309.97	44910.2	10024.9	17803.2	8202.3	6905.45	57841.9	11259.6	6424.42	7669.88	9005.05
NADH dehydrogenase [ubiquinone] 1 beta subcomplex subunit 3 [OS=Homo sapiens]	O43676	O43676	O43676	SUBCELLULAR LOCATION: Mitochondrion inner membrane {ECO:0000305|PubMed:12611891}; Single-pass membrane protein {ECO:0000305}; Matrix side {ECO:0000305}.	integral component of membrane [GO:0016021]; mitochondrial inner membrane [GO:0005743]; mitochondrial respiratory chain complex I [GO:0005747]			3		13943.9	32068.8	38600.2	21988	13675.2	35650.3	50037.5	30305.8	23424.7	20708.8	14934.8	37851.3	31667.7	26672.1	18429.1	24171.1	28930.7	31537.4	21696.5	16690.4	16280.2	46697.4	27520.8	19067	15936.8
NADH dehydrogenase [ubiquinone] 1 alpha subcomplex subunit 2 [OS=Homo sapiens]	O43678	O43678	O43678	SUBCELLULAR LOCATION: Mitochondrion inner membrane {ECO:0000305|PubMed:12611891}; Peripheral membrane protein {ECO:0000305}; Matrix side {ECO:0000305}.	mitochondrial inner membrane [GO:0005743]; mitochondrial membrane [GO:0031966]; mitochondrial respiratory chain complex I [GO:0005747]			3		72871.5	90090.5	65543.6	49109.2	40874.9	92439.3	130226	60569.2	45326.4	42818.8	90018.3	85242.8	54798.7	72637.4	35318	67902.7	69293.4	64107.5	41335	36476.1	128300	112072	61278.9	41691.8	34393.9
ATPase ASNA1 [OS=Homo sapiens]	O43681	O43681	O43681	SUBCELLULAR LOCATION: Cytoplasm. Endoplasmic reticulum. Nucleus, nucleolus.	cytoplasm [GO:0005737]; endoplasmic reticulum membrane [GO:0005789]; extracellular exosome [GO:0070062]; GET complex [GO:0043529]; nucleolus [GO:0005730]; nucleus [GO:0005634]		2	3	4	21564.6	19318.5	32046.5	25304.6	33262.8	34960.6	27095.9	31689.6	21302.2	33252.2	33275.6	26010.9	31597.7	21423.7	32024.8	42866.5	25773.1	29828.9	24190.7	31427.3	37081.6	31424.5	41368.2	31158	28759.2
Mitotic checkpoint protein BUB3 [OS=Homo sapiens];Isoform 2 of Mitotic checkpoint protein BUB3 [OS=Homo sapiens]	O43684;O43684-2	O43684;O43684-2	O43684	SUBCELLULAR LOCATION: Nucleus. Chromosome, centromere, kinetochore {ECO:0000250}. Note=Starts to localize at kinetochores in prometaphase I (Pro-MI) stage and maintains the localization until the metaphase I-anaphase I (MI-AI) transition. {ECO:0000250}.	bub1-bub3 complex [GO:1990298]; condensed chromosome kinetochore [GO:0000777]; cytosol [GO:0005829]; kinetochore [GO:0000776]; mitotic checkpoint complex [GO:0033597]; nucleoplasm [GO:0005654]		2		4	16619.2	16979.8	22024.4	21226.3	24735.1	20020.3	36186.1	19577.3	16438.1	23427.7	17863.4	18862	19760.9	18184.7	24646.1	15128.2	19239.8	19541.4	19499.1	24845.9	22017.9	33030.2	22178.9	22523.1	22852.1
Sulfotransferase family cytosolic 1B member 1 [OS=Homo sapiens]	O43704	O43704	O43704	SUBCELLULAR LOCATION: Cytoplasm {ECO:0000250}.	cytosol [GO:0005829]		2			11962	10028.7	16422.7	17701.7	23214.5	18870.5	10378.9	18618.8	15130.3	17816	12940.7	14994.9	19841	9605.96	24112.4	24713.4	13558.9	20555.4	15262.9	15040.4	25233	24353.2	29508.5	26151.7	34068.4
Alpha-actinin-4 [OS=Homo sapiens]	O43707	O43707	O43707	SUBCELLULAR LOCATION: Nucleus {ECO:0000269|PubMed:22351778, ECO:0000269|PubMed:9508771}. Cytoplasm {ECO:0000269|PubMed:22351778, ECO:0000269|PubMed:9508771}. Cell junction {ECO:0000250|UniProtKB:P57780}. Cytoplasm, cytoskeleton, stress fiber {ECO:0000269|PubMed:9508771}. Note=Localized in cytoplasmic mRNP granules containing untranslated mRNAs. Nuclear translocation can be induced by the PI3 kina…	brush border [GO:0005903]; cell-cell junction [GO:0005911]; cortical cytoskeleton [GO:0030863]; cytoplasm [GO:0005737]; cytosol [GO:0005829]; extracellular exosome [GO:0070062]; extracellular region [GO:0005576]; extracellular space [GO:0005615]; focal adhesion [GO:0005925]; neuron projection [GO:0043005]; nuclear body [GO:0016604]; nucleus [GO:0005634]; perinuclear region of cytoplasm [GO:004847…	1	2		4	34336.2	21315.1	75132.6	55208.7	85150.4	173191	37626.6	82526.4	44173	81975.9	54121.1	38382.8	77568.1	32982.1	80389.4	87844.3	32683.7	72375.1	57021.8	63629.8	121571	80385.5	113686	86576.5	90086.9
maleylacetoacetate isomerase [OS=Homo sapiens]	O43708	O43708	O43708	SUBCELLULAR LOCATION: Cytoplasm {ECO:0000250}.	cytosol [GO:0005829]; mitochondrial matrix [GO:0005759]; mitochondrion [GO:0005739]		2			47861.6	31960.6	15905.5	34958.9	26415.7	54068.4	31279.4	17275.5	46702.2	18979.8	60861.6	34426.7	18952.6	46367.9	25011	48092.6	33944.2	20300.2	25447.2	21709.8	37683.2	13391.6	7363.71	13248.7	11962.1
5'-AMP-activated protein kinase subunit beta-2 [OS=Homo sapiens]	O43741	O43741	O43741	0	cytoplasm [GO:0005737]; cytosol [GO:0005829]; nucleoplasm [GO:0005654]; nucleotide-activated protein kinase complex [GO:0031588]; nucleus [GO:0005634]		2		4	Filtered	4394.44	10351.5	13715.6	12850.3	Filtered	5412.81	10401.9	8203.41	5958.37	Filtered	6191.81	10672.4	11381.1	13834	6642.69	3234.88	13286.5	8146.65	7425.69	Filtered	27016.5	5474.03	5963.71	7611.48
AP-1 complex subunit gamma-1 [OS=Homo sapiens];Isoform 2 of AP-1 complex subunit gamma-1 [OS=Homo sapiens]	O43747-1;O43747-2	O43747-1;O43747-2	O43747	SUBCELLULAR LOCATION: Golgi apparatus {ECO:0000269|PubMed:12773381}. Cytoplasmic vesicle, clathrin-coated vesicle membrane {ECO:0000269|PubMed:12773381}; Peripheral membrane protein {ECO:0000269|PubMed:12773381}; Cytoplasmic side {ECO:0000269|PubMed:12773381}. Note=Component of the coat surrounding the cytoplasmic face of coated vesicles located at the Golgi complex.	AP-1 adaptor complex [GO:0030121]; AP-type membrane coat adaptor complex [GO:0030119]; clathrin-coated vesicle [GO:0030136]; clathrin-coated vesicle membrane [GO:0030665]; cytoplasm [GO:0005737]; cytoplasmic vesicle membrane [GO:0030659]; cytosol [GO:0005829]; Golgi apparatus [GO:0005794]; Golgi membrane [GO:0000139]; intracellular membrane-bounded organelle [GO:0043231]; lysosomal membrane [GO:0…		2	3		28616	31464.4	43753.7	39635.7	41660.4	32717.6	38854.3	39945.4	25200.6	43243.6	22042.9	37685.3	39189.8	29193.7	43736.8	29661	33732.2	39629.8	32866.1	48413.2	35599.5	44672.5	39425.9	31834.3	36060.5
Synaptogyrin-2 [OS=Homo sapiens];Isoform 2 of Synaptogyrin-2 [OS=Homo sapiens]	O43760;O43760-2	O43760;O43760-2	O43760	SUBCELLULAR LOCATION: Cytoplasmic vesicle membrane {ECO:0000250|UniProtKB:O54980}; Multi-pass membrane protein {ECO:0000255}. Cytoplasmic vesicle, secretory vesicle, synaptic vesicle membrane {ECO:0000250|UniProtKB:O54980}; Multi-pass membrane protein {ECO:0000255}. Note=Localizes to cytoplasmic vesicles associated with the recycling endosomes. {ECO:0000250|UniProtKB:O54980}.; SUBCELLULAR LOCATIO…	cell junction [GO:0030054]; extracellular exosome [GO:0070062]; integral component of membrane [GO:0016021]; lipid droplet [GO:0005811]; neuromuscular junction [GO:0031594]; synaptic vesicle membrane [GO:0030672]			3		5916.44	28554.5	29483.8	14646.7	25522.2	Filtered	56277.9	29084.9	9620.76	15773.4	Filtered	40923.9	30948.3	22170.4	19770.4	21254.8	24423.5	40090.7	12208.4	16393.3	34065.7	92862.4	43684.3	17784.5	16458.7
Small glutamine-rich tetratricopeptide repeat-containing protein alpha [OS=Homo sapiens]	O43765	O43765	O43765	SUBCELLULAR LOCATION: Cytoplasm {ECO:0000269|PubMed:16580629}. Nucleus {ECO:0000269|PubMed:16580629}. Note=Co-localizes with HSP90AB1 in the cytoplasm. Increased nuclear accumulation seen during cell apoptosis. {ECO:0000269|PubMed:16580629}.	cytoplasm [GO:0005737]; cytosol [GO:0005829]; extrinsic component of synaptic vesicle membrane [GO:0098850]; membrane [GO:0016020]; nucleus [GO:0005634]; TRC complex [GO:0072380]		2	3	4	Filtered	3378.85	4146.18	9468.39	6904.6	3332.09	5011.21	3256.01	7805.92	6032.48	Filtered	4589.48	5106.09	6361.56	7811.94	4804.61	3880.12	6119.73	7929.03	7160.46	Filtered	8265.83	3884.82	7769.4	6110.97
mitochondrial carnitine/acylcarnitine carrier protein [OS=Homo sapiens]	O43772	O43772	O43772	SUBCELLULAR LOCATION: Mitochondrion inner membrane; Multi-pass membrane protein.	cytosol [GO:0005829]; integral component of membrane [GO:0016021]; mitochondrial inner membrane [GO:0005743]; mitochondrion [GO:0005739]		2	3		40366.9	56809.3	58985.3	35583.9	41894.8	45041.3	80033.6	70862.5	35601.1	42002.7	44386	46204	75470.1	38439.2	38805.4	35798.5	63322.6	59146.1	34849.5	35147.8	35724.3	58506.6	43045.1	26123.6	27908
Asparagine--tRNA ligase, cytoplasmic [OS=Homo sapiens]	O43776	O43776	O43776	SUBCELLULAR LOCATION: Cytoplasm.	cytoplasm [GO:0005737]; cytosol [GO:0005829]; extracellular exosome [GO:0070062]		2			19192.1	26876.9	18559.3	62204.3	62170.1	42611.2	28564.3	20887.6	54480.4	64437.2	33199.1	31864.4	20969	63506.8	76516.6	29473.6	41453.4	17403.6	58572.6	69389.5	26449	50719.9	31332.5	83439	67979.5
Isoform 2 of Unconventional myosin-Ib [OS=Homo sapiens]	O43795-2	O43795-2	O43795	0	actin filament [GO:0005884]; apical part of cell [GO:0045177]; brush border [GO:0005903]; cell periphery [GO:0071944]; cytoplasm [GO:0005737]; early endosome [GO:0005769]; endosome membrane [GO:0010008]; extracellular exosome [GO:0070062]; filopodium [GO:0030175]; myosin complex [GO:0016459]; perinuclear region of cytoplasm [GO:0048471]; plasma membrane [GO:0005886]		2	3	4	21846.5	17426.2	61637.4	49133.2	69657.7	71436.6	32745.4	59192.7	37394.8	64613.4	19591.4	32462.4	56511.6	24975.4	68681.2	41165.7	24603.9	56435.7	36648.9	58463.2	36512.2	16752.2	36467.4	37207.8	43229.7
Cleavage and polyadenylation specificity factor subunit 5 [OS=Homo sapiens]	O43809	O43809	O43809	SUBCELLULAR LOCATION: Nucleus {ECO:0000269|PubMed:15169763, ECO:0000269|PubMed:19864460, ECO:0000269|PubMed:20695905, ECO:0000269|PubMed:9659921}. Cytoplasm {ECO:0000269|PubMed:19864460}. Note=Shuttles between the nucleus and the cytoplasm in a transcription- and XPO1/CRM1-independent manner, most probably in complex with the cleavage factor Im complex (CFIm) (PubMed:19864460). In punctate subnuc…	centrosome [GO:0005813]; cytoplasm [GO:0005737]; microtubule organizing center [GO:0005815]; mRNA cleavage and polyadenylation specificity factor complex [GO:0005847]; mRNA cleavage factor complex [GO:0005849]; nuclear body [GO:0016604]; nucleoplasm [GO:0005654]; nucleus [GO:0005634]; paraspeckles [GO:0042382]		2		4	20537.8	17266.6	10950.2	16800.7	17084.7	18614.8	28411.4	13785.4	15840.1	16359.1	25445.7	19380	12141.2	18574.7	16575.5	17052.2	17218.2	13847.8	14009.1	17093.2	30486.7	30694.8	15320.4	17651.4	16374.3
LanC-like protein 1 [OS=Homo sapiens]	O43813	O43813	O43813	SUBCELLULAR LOCATION: Cytoplasm {ECO:0000269|PubMed:15811525}. Cell membrane {ECO:0000269|PubMed:10944443, ECO:0000269|PubMed:16979580}; Peripheral membrane protein {ECO:0000269|PubMed:10944443}.	cytoplasm [GO:0005737]; integral component of plasma membrane [GO:0005887]; plasma membrane [GO:0005886]		2	3		12236.8	12066.9	14104.4	18661.8	33363.6	34096.1	22315.8	13017.6	20664.9	23042.8	23471.1	18625.6	14406.4	25559.7	24269.9	50181.1	14002.9	14162.2	19439.2	18302.8	33810.3	27492.9	19528.7	22349.9	18129.6
Protein SCO2 homolog, mitochondrial [OS=Homo sapiens]	O43819	O43819	O43819	SUBCELLULAR LOCATION: Mitochondrion inner membrane {ECO:0000269|PubMed:15229189}; Single-pass membrane protein {ECO:0000255}.	integral component of mitochondrial inner membrane [GO:0031305]; mitochondrial matrix [GO:0005759]; mitochondrion [GO:0005739]; myofibril [GO:0030016]			3		Filtered	20036.8	11945.5	11407.4	11793.4	Filtered	16724.9	7910.45	19880.2	9277.79	29615	18809.2	8739.54	21257.9	21217.3	Filtered	8359.41	12352.4	17917.5	15563.3	Filtered	30800.3	14882.1	19065.4	23685.5
Glucose-6-phosphate exchanger SLC37A4 [OS=Homo sapiens];Isoform 2 of Glucose-6-phosphate exchanger SLC37A4 [OS=Homo sapiens]	O43826-1;O43826-2	O43826-1;O43826-2	O43826	SUBCELLULAR LOCATION: Endoplasmic reticulum membrane {ECO:0000269|PubMed:21949678}; Multi-pass membrane protein {ECO:0000255}.	endoplasmic reticulum [GO:0005783]; endoplasmic reticulum membrane [GO:0005789]; integral component of endoplasmic reticulum membrane [GO:0030176]; integral component of membrane [GO:0016021]; membrane [GO:0016020]			3		30857.6	36163.8	54328	23564.8	25360.7	30410.6	83154.7	53966	22733.4	29087.5	36022.8	47989	51197.6	31618.6	25711.7	49154.2	34582.3	54927.6	26274.3	24386.5	53787.3	59844.4	47691.1	22745.2	19762
isocitrate dehydrogenase [NAD] subunit beta, mitochondrial [OS=Homo sapiens]	O43837-1	O43837-1	O43837	SUBCELLULAR LOCATION: Mitochondrion.	mitochondrial matrix [GO:0005759]; mitochondrion [GO:0005739]; nucleus [GO:0005634]				4	24370.8	11026.8	19247.5	11653.4	12198.1	52309.4	12934.4	21433	9738.23	8685.06	33136	12740.9	20128.6	12405.8	11484.4	32860.1	10323.8	18522.4	11894.5	8470.5	81475.2	32751.5	24776	19464.6	25172.3
Calumenin [OS=Homo sapiens];Isoform 3 of Calumenin [OS=Homo sapiens]	O43852;O43852-3	O43852;O43852-3	O43852	SUBCELLULAR LOCATION: Endoplasmic reticulum membrane {ECO:0000269|PubMed:10222138}. Golgi apparatus {ECO:0000269|PubMed:10222138}. Secreted {ECO:0000305}. Melanosome {ECO:0000269|PubMed:12643545}. Sarcoplasmic reticulum lumen {ECO:0000305}. Note=Identified by mass spectrometry in melanosome fractions from stage I to stage IV. {ECO:0000269|PubMed:12643545}.	endoplasmic reticulum [GO:0005783]; endoplasmic reticulum lumen [GO:0005788]; endoplasmic reticulum membrane [GO:0005789]; extracellular region [GO:0005576]; Golgi apparatus [GO:0005794]; melanosome [GO:0042470]; membrane [GO:0016020]; sarcoplasmic reticulum lumen [GO:0033018]			3		24337.4	21644.2	37029.8	57774.1	60412.2	99872.2	59736	32507.5	53734.7	50008.1	39689.2	29985.7	28495.2	39671.2	63764.5	43061.5	38404.4	32449.7	53213.2	48110.4	85259.8	97207	43868.4	77893	63437.4
S-adenosylhomocysteine hydrolase-like protein 1 [OS=Homo sapiens];Isoform 2 of S-adenosylhomocysteine hydrolase-like protein 1 [OS=Homo sapiens];Adenosylhomocysteinase 3 [OS=Homo sapiens];Isoform 2 of Adenosylhomocysteinase 3 [OS=Homo sapiens];Isoform 3 of Adenosylhomocysteinase 3 [OS=Homo sapiens];Isoform 4 of Adenosylhomocysteinase 3 [OS=Homo sapiens]	O43865;O43865-2;Q96HN2;Q96HN2-2;Q96HN2-3;Q96HN2-4	O43865;O43865-2;Q96HN2;Q96HN2-2;Q96HN2-3;Q96HN2-4	O43865	SUBCELLULAR LOCATION: Endoplasmic reticulum {ECO:0000250|UniProtKB:Q80SW1}. Cytoplasm, cytosol {ECO:0000250|UniProtKB:Q80SW1}. Microsome {ECO:0000250|UniProtKB:Q80SW1}. Apical cell membrane {ECO:0000250|UniProtKB:B5DFN2}. Note=Associates with membranes when phosphorylated, probably through interaction with ITPR1. {ECO:0000250|UniProtKB:Q80SW1}.	apical plasma membrane [GO:0016324]; cytoplasm [GO:0005737]; cytosol [GO:0005829]; endoplasmic reticulum membrane [GO:0005789]; extracellular exosome [GO:0070062]		2	3		21629.3	19586	16830.7	17421.3	18622.6	25059.4	23460.9	14129.5	18558.6	16789.6	18391.7	23235.9	9430.14	16827.7	10233.2	23285.7	14759.3	14477.3	17710.3	15417.5	41487.7	18867.3	16401.5	12037.6	22644.2
CD5 antigen-like [OS=Homo sapiens]	O43866	O43866	O43866	SUBCELLULAR LOCATION: Secreted {ECO:0000269|PubMed:24223991, ECO:0000269|PubMed:24804991}. Cytoplasm {ECO:0000250|UniProtKB:Q9QWK4}. Note=Secreted by macrophages and circulates in the blood (PubMed:24223991, PubMed:24804991). Transported in the cytoplasm via CD36-mediated endocytosis (By similarity). {ECO:0000250|UniProtKB:Q9QWK4, ECO:0000269|PubMed:24223991, ECO:0000269|PubMed:24804991}.	blood microparticle [GO:0072562]; cell surface [GO:0009986]; cytoplasm [GO:0005737]; extracellular region [GO:0005576]; extracellular space [GO:0005615]; plasma membrane [GO:0005886]	1	2	3		7942.68	3643.9	Filtered	7634.03	9876.8	Filtered	Filtered	Filtered	11752.4	6881.21	Filtered	Filtered	Filtered	16149.1	11520	14579.8	Filtered	Filtered	8873.88	9634.66	98788.5	20650.6	10883.9	24336.4	25885.9
Growth arrest-specific protein 2 [OS=Homo sapiens]	O43903	O43903	O43903	SUBCELLULAR LOCATION: Cytoplasm, cytoskeleton, stress fiber {ECO:0000250|UniProtKB:P11862}. Membrane {ECO:0000250|UniProtKB:P11862}; Peripheral membrane protein {ECO:0000250|UniProtKB:P11862}. Note=Component of the microfilament system. Colocalizes with actin fibers at the cell border and along the stress fibers in growth-arrested fibroblasts. Mainly membrane-associated. When hyperphosphorylated,…	actin filament [GO:0005884]; cytosol [GO:0005829]; membrane [GO:0016020]		2	3		Filtered	Filtered	1251.13	Filtered	Filtered	Filtered	Filtered	1318.49	Filtered	1154.91	Filtered	Filtered	923.354	Filtered	1145.72	Filtered	Filtered	1407.09	Filtered	Filtered	Filtered	Filtered	948.039	Filtered	Filtered
NADH dehydrogenase [ubiquinone] iron-sulfur protein 5 [OS=Homo sapiens]	O43920	O43920	O43920	SUBCELLULAR LOCATION: Mitochondrion inner membrane {ECO:0000305|PubMed:12611891}; Peripheral membrane protein {ECO:0000305}. Mitochondrion intermembrane space {ECO:0000305}.	mitochondrial inner membrane [GO:0005743]; mitochondrial intermembrane space [GO:0005758]; mitochondrial respiratory chain complex I [GO:0005747]; mitochondrion [GO:0005739]			3		29137	33529.1	30366.4	38865.8	35607	42908.1	53542.8	26072.9	30855.1	32013.4	26911.4	44220.7	24758.5	36513.9	32850.4	31900.3	30767.1	28422	39651.9	35342.3	32996.1	52683.3	21813.5	31315	24343.8
Aldo-keto reductase family 1 member B10 [OS=Homo sapiens]	O60218	O60218	O60218	SUBCELLULAR LOCATION: Lysosome {ECO:0000269|PubMed:21585341}. Secreted {ECO:0000269|PubMed:21585341}. Note=Secreted through a lysosome-mediated non-classical pathway.	cytosol [GO:0005829]; extracellular region [GO:0005576]; lysosome [GO:0005764]; mitochondrion [GO:0005739]		2			40104.6	27807	22405.9	39161.9	13178.3	53885.9	14490.6	56086.3	6785.07	43691.8	4878.47	18577.7	30203	14606.5	40617.9	49471.4	27034	48370.6	21850.8	26463.8	201808	347931	110110	96648.3	111490
Mitochondrial import inner membrane translocase subunit Tim8 A [OS=Homo sapiens]	O60220	O60220	O60220	SUBCELLULAR LOCATION: Mitochondrion inner membrane {ECO:0000269|PubMed:11489896}; Peripheral membrane protein {ECO:0000269|PubMed:11489896}; Intermembrane side {ECO:0000269|PubMed:11489896}.	mitochondrial inner membrane [GO:0005743]; mitochondrial intermembrane space [GO:0005758]; mitochondrion [GO:0005739]			3		28796.6	46697	5455.14	67489.8	78493	44011.1	77776	5331.9	71363.1	37701.5	32323.2	27168.5	4738.12	58450.3	67794.7	29262.1	49380.5	12560.9	51126.1	56016.9	58895.7	48943.5	8175.47	73920.9	50914.1
glia maturation factor gamma [OS=Homo sapiens]	O60234	O60234	O60234	0	actin cortical patch [GO:0030479]; extracellular region [GO:0005576]; ficolin-1-rich granule lumen [GO:1904813]; secretory granule lumen [GO:0034774]					14682.8	39815.3	28410.8	13981.9	15753.8	26605.9	24942.3	24948.6	12760.1	15627.7	29954.8	14117.9	25562.3	16878	14685.6	22083.5	22216.1	20162	13929.7	12500.2	19684.3	65579.3	24435.3	17446.6	12639.8
Transmembrane protease serine 11D [OS=Homo sapiens];Arf-GAP with Rho-GAP domain, ANK repeat and PH domain-containing protein 2 [OS=Homo sapiens]	O60235;Q8WZ64	O60235;Q8WZ64	O60235	SUBCELLULAR LOCATION: Cell membrane; Single-pass type II membrane protein. Note=Activated by cleavage and secreted.; SUBCELLULAR LOCATION: Transmembrane protease serine 11D catalytic chain: Secreted. Note=Activated by cleavage and secreted.	extracellular exosome [GO:0070062]; extracellular region [GO:0005576]; integral component of plasma membrane [GO:0005887]			3		Filtered	22526.4	39346.4	4316.2	4282.17	Filtered	31517.9	28374	1981.44	4184.09	Filtered	28417.2	34736.4	Filtered	3729.5	Filtered	7168.1	29733.3	2585.43	2077.93	Filtered	36956.9	25912.1	1829.7	3661.09
Phosphoribosyl pyrophosphate synthase-associated protein 2 [OS=Homo sapiens]	O60256-1	O60256-1	O60256	0	cytoplasm [GO:0005737]; ribose phosphate diphosphokinase complex [GO:0002189]		2			29434	25660.4	13764.4	22330.5	25546.3	26327.9	33396.6	17248.8	22291.6	24075.4	41229.9	26409.4	18114.2	26352.2	25002	21371.3	31421.6	16034.4	25250.6	26526.4	19877	34707.8	14750.1	20131.8	21865.3
C-jun-amino-terminal kinase-interacting protein 4 [OS=Homo sapiens];Isoform 2 of C-Jun-amino-terminal kinase-interacting protein 4 [OS=Homo sapiens];Isoform 3 of C-Jun-amino-terminal kinase-interacting protein 4 [OS=Homo sapiens];Isoform 4 of C-Jun-amino-terminal kinase-interacting protein 4 [OS=Homo sapiens];Isoform 5 of C-Jun-amino-terminal kinase-interacting protein 4 [OS=Homo sapiens];Isoform…	O60271;O60271-2;O60271-3;O60271-4;O60271-5;O60271-9	O60271;O60271-2;O60271-3;O60271-4;O60271-5;O60271-9	O60271	SUBCELLULAR LOCATION: Cytoplasm. Cytoplasm, perinuclear region. Note=Perinuclear distribution in response to stress signals such as UV radiation.; SUBCELLULAR LOCATION: Isoform 5: Cytoplasmic vesicle, secretory vesicle, acrosome. Note=Associated with the plasma membrane of the acrosomal compartment and also localizes in the acrosome matrix.	acrosomal vesicle [GO:0001669]; cytoplasm [GO:0005737]; cytosol [GO:0005829]; extracellular exosome [GO:0070062]; microtubule organizing center [GO:0005815]; perinuclear region of cytoplasm [GO:0048471]		2		4	Filtered	Filtered	6116.2	4045.06	Filtered	Filtered	Filtered	4173.52	4608.9	Filtered	Filtered	Filtered	4076.44	Filtered	Filtered	10986.1	Filtered	6252.27	4066.16	5542.51	Filtered	Filtered	5031.35	4527.61	Filtered
Isoform 2 of Dynamin-like 120 kDa protein, mitochondrial [OS=Homo sapiens]	O60313-2	O60313-2	O60313	SUBCELLULAR LOCATION: Mitochondrion inner membrane {ECO:0000269|PubMed:11017079, ECO:0000269|PubMed:16778770, ECO:0000269|PubMed:20974897, ECO:0000269|PubMed:28746876}; Single-pass membrane protein {ECO:0000255}. Mitochondrion intermembrane space {ECO:0000250|UniProtKB:P58281}. Mitochondrion membrane {ECO:0000269|PubMed:24616225}. Note=Detected at contact sites between endoplamic reticulum and mi…	axon cytoplasm [GO:1904115]; cytoplasm [GO:0005737]; cytosol [GO:0005829]; dendrite [GO:0030425]; extrinsic component of mitochondrial inner membrane [GO:0031314]; integral component of membrane [GO:0016021]; membrane [GO:0016020]; mitochondrial crista [GO:0030061]; mitochondrial inner membrane [GO:0005743]; mitochondrial intermembrane space [GO:0005758]; mitochondrial membrane [GO:0031966]; mito…		2	3	4	29353.6	20924.9	28150.4	27756.6	29609.2	44408	28207.8	28272	20369.6	33189.7	32682.8	24330	28107	25650.6	31603.4	35142.1	25400.1	27560.4	31243	31201.7	48416.7	26291.3	18130.6	31097.3	30238.8
putative nucleoside diphosphate kinase [OS=Homo sapiens]	O60361	O60361	O60361	0	extracellular exosome [GO:0070062]; nucleus [GO:0005634]				4	Filtered	18190.3	11891.6	Filtered	Filtered	Filtered	32881.8	9220.88	Filtered	Filtered	Filtered	12897.4	14739.8	Filtered	Filtered	Filtered	7539.69	14007	Filtered	Filtered	Filtered	15478	21386.1	Filtered	Filtered
Fatty acid desaturase 1 [OS=Homo sapiens];Isoform 2 of Fatty acid desaturase 1 [OS=Homo sapiens]	O60427;O60427-2	O60427;O60427-2	O60427	SUBCELLULAR LOCATION: Isoform 1: Endoplasmic reticulum membrane {ECO:0000250|UniProtKB:A4UVI1}; Multi-pass membrane protein {ECO:0000250|UniProtKB:A4UVI1}. Mitochondrion {ECO:0000269|PubMed:22619218}.; SUBCELLULAR LOCATION: Isoform 2: Endoplasmic reticulum membrane {ECO:0000250|UniProtKB:A4UVI1}; Multi-pass membrane protein {ECO:0000250|UniProtKB:A4UVI1}.	endoplasmic reticulum membrane [GO:0005789]; integral component of membrane [GO:0016021]; intracellular membrane-bounded organelle [GO:0043231]; membrane [GO:0016020]; mitochondrion [GO:0005739]			3		Filtered	997.685	4795.81	Filtered	Filtered	Filtered	Filtered	5215.62	Filtered	Filtered	Filtered	1030.18	4388.43	Filtered	Filtered	Filtered	604.742	5429.29	Filtered	Filtered	Filtered	Filtered	Filtered	Filtered	Filtered
periplakin [OS=Homo sapiens]	O60437	O60437	O60437	SUBCELLULAR LOCATION: Cell junction, desmosome {ECO:0000269|PubMed:9412476}. Cytoplasm, cytoskeleton {ECO:0000269|PubMed:9412476}. Cell membrane {ECO:0000250}. Nucleus {ECO:0000250}. Mitochondrion {ECO:0000250}. Note=Associated with desmosomes and intermediate filaments.	cornified envelope [GO:0001533]; cytoplasm [GO:0005737]; cytoskeleton [GO:0005856]; cytosol [GO:0005829]; desmosome [GO:0030057]; extracellular exosome [GO:0070062]; membrane [GO:0016020]; mitochondrion [GO:0005739]; nucleus [GO:0005634]		2	3	4	8922.08	4827.19	14515.8	21792.9	27818.7	26051.8	26720.1	15958.6	13959.6	25095.6	13612	8491.37	15796.8	7901.43	26983.7	18714.4	7563.9	14150.5	17927.2	29410.4	8445.07	5363.41	8841.82	14065.7	15396.2
Isoform 2 of Lymphocyte antigen 75 [OS=Homo sapiens];Isoform 3 of Lymphocyte antigen 75 [OS=Homo sapiens];CD302 antigen [OS=Homo sapiens]	O60449-2;O60449-3;Q8IX05	O60449-2;O60449-3;Q8IX05	O60449	SUBCELLULAR LOCATION: Membrane {ECO:0000250}; Single-pass type I membrane protein {ECO:0000250}.	extracellular exosome [GO:0070062]; integral component of plasma membrane [GO:0005887]			3		Filtered	Filtered	1588.56	5616.31	Filtered	Filtered	Filtered	1377.28	5279.73	2424.62	Filtered	2082.49	1572.79	6653.25	1911.4	Filtered	Filtered	Filtered	3503.53	3604.75	Filtered	Filtered	3893.89	4338.69	Filtered
sorting nexin-3 [OS=Homo sapiens];Isoform 4 of Sorting nexin-3 [OS=Homo sapiens]	O60493-1;O60493-4	O60493-1;O60493-4	O60493	SUBCELLULAR LOCATION: Early endosome {ECO:0000269|PubMed:11433298, ECO:0000269|PubMed:21725319}. Cytoplasmic vesicle, phagosome {ECO:0000269|PubMed:23237080}. Note=Colocalizes to clathrin-coated endosomal vesicles morphologically distinct from retromer-decorated non-branched endosomal tubule structures (PubMed:21725319) Colocalizes with EEA1 on nascent phagosomes in dendritic cells but competes w…	clathrin-coated vesicle [GO:0030136]; cytoplasm [GO:0005737]; cytosol [GO:0005829]; early endosome [GO:0005769]; early endosome membrane [GO:0031901]; early phagosome [GO:0032009]; endosome membrane [GO:0010008]; extracellular exosome [GO:0070062]		2	3		96436.7	52951.8	63144.7	47991.3	66712.7	119821	81784.9	62233.8	45022.6	57770	114661	61336.6	59153.9	50472.8	65465.6	98811.9	51170.6	59438.2	49715.3	55943.7	97399	58445.9	48058.9	40792.2	41412.4
protein O-GlcNAcase [OS=Homo sapiens];Isoform 2 of Protein O-GlcNAcase [OS=Homo sapiens];Isoform 3 of Protein O-GlcNAcase [OS=Homo sapiens];Isoform 4 of Protein O-GlcNAcase [OS=Homo sapiens]	O60502;O60502-2;O60502-3;O60502-4	O60502;O60502-2;O60502-3;O60502-4	O60502	SUBCELLULAR LOCATION: Isoform 3: Nucleus {ECO:0000269|PubMed:11341771}.; SUBCELLULAR LOCATION: Isoform 1: Cytoplasm {ECO:0000269|PubMed:11148210, ECO:0000269|PubMed:11341771, ECO:0000269|PubMed:11788610}.	cytosol [GO:0005829]; membrane [GO:0016020]; nucleus [GO:0005634]		2	3	4	4753.55	7071.65	4059.56	3322.28	3230.5	2472.74	4214.33	3497.36	3158.91	3122.56	4298.43	2593.86	2887.69	3365.64	3155.19	3672.58	1081.24	2457.68	2783.75	3237.91	Filtered	Filtered	2141.33	3825.62	1880.55
Vinexin [OS=Homo sapiens];Isoform Beta of Vinexin [OS=Homo sapiens]	O60504-1;O60504-2	O60504-1;O60504-2	O60504	SUBCELLULAR LOCATION: Isoform Alpha: Cell junction {ECO:0000250}. Cytoplasm, cytoskeleton {ECO:0000250}. Note=Localized at cell-extracellular matrix junctions (By similarity). Both isoforms were localized at focal adhesion and cell-cell adhesion sites. {ECO:0000250}.; SUBCELLULAR LOCATION: Isoform Beta: Cell junction {ECO:0000250}. Nucleus. Cytoplasm, cytoskeleton {ECO:0000250}. Note=Localized at…	cytoskeleton [GO:0005856]; cytosol [GO:0005829]; focal adhesion [GO:0005925]; nucleus [GO:0005634]		2		4	Filtered	4531.97	7970.22	13037.6	7081.72	Filtered	Filtered	8462.54	6709.81	5657.23	3542.62	5533	7890.92	7823.05	5928.75	Filtered	6613.84	7463.97	7697.71	7959.02	Filtered	10442.2	13609.3	14859.9	7736.7
Isoform 3 of Heterogeneous nuclear ribonucleoprotein Q [OS=Homo sapiens];Isoform 4 of Heterogeneous nuclear ribonucleoprotein Q [OS=Homo sapiens]	O60506-3;O60506-4	O60506-3;O60506-4	O60506	SUBCELLULAR LOCATION: Cytoplasm {ECO:0000269|PubMed:11574476, ECO:0000269|PubMed:17289661, ECO:0000269|PubMed:19029303}. Microsome {ECO:0000250|UniProtKB:Q7TMK9}. Endoplasmic reticulum {ECO:0000250}. Nucleus {ECO:0000250|UniProtKB:Q7TMK9}. Note=The tyrosine phosphorylated form bound to RNA is found in microsomes (By similarity). Localized in cytoplasmic mRNP granules containing untranslated mRNAs…	catalytic step 2 spliceosome [GO:0071013]; CRD-mediated mRNA stability complex [GO:0070937]; endoplasmic reticulum [GO:0005783]; GAIT complex [GO:0097452]; histone pre-mRNA 3'end processing complex [GO:0071204]; membrane [GO:0016020]; nucleoplasm [GO:0005654]; nucleus [GO:0005634]; ribonucleoprotein complex [GO:1990904]			3	4	93862.6	56787.3	86880.7	72143.1	95057.3	97495.2	118047	85235.4	67161.1	91219	100688	72941.9	78976	68230	97401.2	83091.5	66147.8	81770.6	78704.7	94034.8	123370	110845	93076.7	95869	83875.1
ran-binding protein 6 [OS=Homo sapiens]	O60518	O60518	O60518	SUBCELLULAR LOCATION: Cytoplasm {ECO:0000250}. Nucleus {ECO:0000250}.	cytoplasm [GO:0005737]; nuclear membrane [GO:0031965]; nuclear periphery [GO:0034399]		2	3	4	Filtered	Filtered	6382.06	550.678	Filtered	Filtered	Filtered	3696.98	202.707	354.092	Filtered	231.306	1861.71	161.857	195.191	Filtered	Filtered	5846.9	249.229	270.693	Filtered	Filtered	1083.81	190.055	Filtered
GDP-mannose 4,6 dehydratase [OS=Homo sapiens]	O60547-1	O60547-1	O60547	0	cytoplasm [GO:0005737]; cytosol [GO:0005829]; extracellular exosome [GO:0070062]		2			Filtered	2079.58	3242.46	1425.05	5700.23	Filtered	1413.18	1710.95	1340.23	2662.37	Filtered	2274.62	1737.94	5223.79	742.236	Filtered	1112.97	2125.95	3472.71	1311.99	Filtered	14141	4026.38	5138.86	4445.65
Glycylpeptide N-tetradecanoyltransferase 2 [OS=Homo sapiens]	O60551	O60551	O60551	SUBCELLULAR LOCATION: Cytoplasm {ECO:0000269|PubMed:9506952}. Membrane {ECO:0000269|PubMed:9506952}; Peripheral membrane protein {ECO:0000269|PubMed:9506952}.	cytoplasm [GO:0005737]; cytosol [GO:0005829]; extrinsic component of membrane [GO:0019898]; Golgi apparatus [GO:0005794]; host cell [GO:0043657]; plasma membrane [GO:0005886]		2	3		8853.1	Filtered	5762.01	4550.29	5781.9	Filtered	Filtered	5469.79	3494.35	5387.27	Filtered	4382.77	5188.42	3582.08	5208.63	Filtered	Filtered	3225.63	4314.64	5569.65	4913.96	Filtered	3621.46	6211.85	7830.25
Procollagen-lysine,2-oxoglutarate 5-dioxygenase 3 [OS=Homo sapiens]	O60568	O60568	O60568	SUBCELLULAR LOCATION: Rough endoplasmic reticulum {ECO:0000269|PubMed:10934207}. Endoplasmic reticulum lumen {ECO:0000269|PubMed:20470363}. Endoplasmic reticulum membrane {ECO:0000250|UniProtKB:Q9R0E1}; Peripheral membrane protein {ECO:0000250|UniProtKB:Q9R0E1}; Lumenal side {ECO:0000250|UniProtKB:Q9R0E1}. Secreted {ECO:0000269|PubMed:21465473}. Secreted, extracellular space {ECO:0000250|UniProtK…	collagen-containing extracellular matrix [GO:0062023]; endoplasmic reticulum [GO:0005783]; endoplasmic reticulum lumen [GO:0005788]; endoplasmic reticulum membrane [GO:0005789]; extracellular exosome [GO:0070062]; extracellular space [GO:0005615]; Golgi apparatus [GO:0005794]; rough endoplasmic reticulum [GO:0005791]; trans-Golgi network [GO:0005802]	1		3		8784.97	6832.23	7228.14	15428	16616.5	12683.8	12867	8053.25	13599.4	14401.4	20981	6648.36	7841.74	12018.3	17291.7	15428.2	8519.18	7546.88	14834.4	14061	18355.3	23717.5	12245.1	23619.8	21876.7
Protein diaphanous homolog 1 [OS=Homo sapiens];Isoform 2 of Protein diaphanous homolog 1 [OS=Homo sapiens];Isoform 3 of Protein diaphanous homolog 1 [OS=Homo sapiens]	O60610-1;O60610-2;O60610-3	O60610-1;O60610-2;O60610-3	O60610	SUBCELLULAR LOCATION: Cell membrane {ECO:0000250|UniProtKB:O08808}. Cell projection, ruffle membrane {ECO:0000250|UniProtKB:O08808}. Cytoplasm, cytoskeleton {ECO:0000269|PubMed:24781755}. Cytoplasm, cytoskeleton, microtubule organizing center, centrosome {ECO:0000269|PubMed:24781755}. Cytoplasm, cytoskeleton, spindle {ECO:0000269|PubMed:24781755}. Cytoplasm {ECO:0000250|UniProtKB:O08808}. Nucleus…	cytoplasm [GO:0005737]; cytosol [GO:0005829]; ficolin-1-rich granule membrane [GO:0101003]; microtubule organizing center [GO:0005815]; mitotic spindle [GO:0072686]; nucleus [GO:0005634]; plasma membrane [GO:0005886]; ruffle membrane [GO:0032587]; secretory granule membrane [GO:0030667]		2	3	4	7040.05	4917.86	11786.6	9716.53	9111.65	19417.5	5851.95	11652.4	8516.86	11289.6	6759.11	5738.46	11408	6601.85	9582.45	16786.9	7172.39	11295.6	9539.22	11505.2	10328	8166.93	11824.8	10515.4	9866.51
selenoprotein F [OS=Homo sapiens]	O60613-1	O60613-1	O60613	SUBCELLULAR LOCATION: Endoplasmic reticulum lumen {ECO:0000269|PubMed:11278576}. Note=The association with UGGT1/UGCGL1 is essential for its retention in the endoplasmic reticulum.	endoplasmic reticulum lumen [GO:0005788]					7060.89	3751.68	5299.08	6560.97	4140.77	Filtered	3029.87	3403.52	5984.51	3566.57	Filtered	4656.5	4067.68	5512.62	3390.29	Filtered	Filtered	4650.59	5550.05	4933.67	3718.2	5220.05	3033.66	4544.54	5464.58
UDP-glucuronosyltransferase 1-9 [OS=Homo sapiens]	O60656-1	O60656-1	O60656	SUBCELLULAR LOCATION: Microsome. Endoplasmic reticulum membrane {ECO:0000305}; Single-pass membrane protein {ECO:0000305}.	endoplasmic reticulum [GO:0005783]; endoplasmic reticulum membrane [GO:0005789]; integral component of membrane [GO:0016021]; intracellular membrane-bounded organelle [GO:0043231]			3		320405	175683	248604	290696	268712	442005	250964	292902	223744	254482	436561	239196	284469	247558	303370	341750	230479	279201	275429	294628	409317	334986	317152	367132	334428
Perilipin-3 [OS=Homo sapiens];Isoform 4 of Perilipin-3 [OS=Homo sapiens]	O60664-1;O60664-4	O60664-1;O60664-4	O60664	SUBCELLULAR LOCATION: Cytoplasm {ECO:0000269|PubMed:15545278, ECO:0000269|PubMed:26357594, ECO:0000269|PubMed:9590177}. Endosome membrane {ECO:0000305}; Peripheral membrane protein {ECO:0000305}; Cytoplasmic side {ECO:0000305}. Lipid droplet {ECO:0000305}. Note=Membrane associated on endosomes. Detected in the envelope and the core of lipid bodies and in lipid sails. {ECO:0000305}.	cytoplasm [GO:0005737]; cytosol [GO:0005829]; endosome [GO:0005768]; endosome membrane [GO:0010008]; Golgi apparatus [GO:0005794]; lipid droplet [GO:0005811]; membrane [GO:0016020]; transport vesicle [GO:0030133]		2	3		29348.7	16223.1	10659.8	15541.2	16165.2	39867.7	20457.4	12537.6	15375.1	17307.3	39514	15066.6	13030	18321.2	13949.6	22545.4	16522.6	13810.5	15479.4	16643.6	27293.3	16012	22692.2	17232.6	15627.6
Importin subunit alpha-7 [OS=Homo sapiens]	O60684	O60684	O60684	0	cytosol [GO:0005829]; host cell [GO:0043657]; membrane [GO:0016020]; nuclear pore [GO:0005643]; nucleoplasm [GO:0005654]		2	3	4	6447.89	Filtered	4315.62	10787.6	12835.7	16893.2	Filtered	5600.01	7197.39	6443.46	Filtered	5626.5	6723.84	3208.55	10749.3	7917.2	4234.27	5908.83	11056.5	9061.97	16263.2	Filtered	5705.15	10720.9	7361.02
UDP-glucose 6-dehydrogenase [OS=Homo sapiens]	O60701	O60701	O60701	0	cytosol [GO:0005829]; extracellular exosome [GO:0070062]; nucleoplasm [GO:0005654]; nucleus [GO:0005634]		2		4	336756	299140	205991	431676	508724	573056	549999	174683	366063	398272	398603	395122	202015	439574	435200	376965	330781	232978	387073	407602	506369	577309	165429	297713	317042
Catenin delta-1 [OS=Homo sapiens];Isoform 2AB of Catenin delta-1 [OS=Homo sapiens];Isoform 2AC of Catenin delta-1 [OS=Homo sapiens];Isoform 2A of Catenin delta-1 [OS=Homo sapiens];Isoform 1AB of Catenin delta-1 [OS=Homo sapiens];Isoform 1AC of Catenin delta-1 [OS=Homo sapiens];Isoform 1A of Catenin delta-1 [OS=Homo sapiens];Isoform 2ABC of Catenin delta-1 [OS=Homo sapiens]	O60716-1;O60716-10;O60716-11;O60716-13;O60716-2;O60716-3;O60716-5;O60716-9	O60716-1;O60716-10;O60716-11;O60716-13;O60716-2;O60716-3;O60716-5;O60716-9	O60716	SUBCELLULAR LOCATION: Cytoplasm {ECO:0000269|PubMed:15240885, ECO:0000269|PubMed:17047063}. Nucleus {ECO:0000269|PubMed:11896187, ECO:0000269|PubMed:17115030}. Cell membrane {ECO:0000269|PubMed:15240885, ECO:0000269|PubMed:17047063}. Note=Interaction with GLIS2 promotes nuclear translocation (By similarity). Detected at cell-cell contacts (PubMed:15240885, PubMed:17047063). NANOS1 induces its tra…	catenin complex [GO:0016342]; cell-cell adherens junction [GO:0005913]; cell-cell junction [GO:0005911]; cytoplasm [GO:0005737]; cytosol [GO:0005829]; dendritic spine [GO:0043197]; extracellular exosome [GO:0070062]; glutamatergic synapse [GO:0098978]; growth cone [GO:0030426]; hippocampal mossy fiber to CA3 synapse [GO:0098686]; lamellipodium [GO:0030027]; midbody [GO:0030496]; nucleus [GO:00056…		2	3	4	20723.4	18543.4	52462.5	29163.8	44533.6	71082.5	26158	55293.3	23324.1	41868.3	27468.8	30507.8	51283.6	14758.8	45276.3	52011.9	18133.9	47734.7	26198.2	36888.1	55571.9	20535.9	48655.7	30428.1	41012.4
Sorting nexin-2 [OS=Homo sapiens];Isoform 2 of Sorting nexin-2 [OS=Homo sapiens]	O60749;O60749-2	O60749;O60749-2	O60749	SUBCELLULAR LOCATION: Early endosome membrane {ECO:0000269|PubMed:16179610, ECO:0000269|PubMed:17101778}; Peripheral membrane protein {ECO:0000269|PubMed:16179610, ECO:0000269|PubMed:17101778}; Cytoplasmic side {ECO:0000269|PubMed:16179610, ECO:0000269|PubMed:17101778}. Cell projection, lamellipodium {ECO:0000269|PubMed:20604901}. Note=Colocalized with SORT1 to tubular endosomal membrane structur…	cytoplasm [GO:0005737]; cytosol [GO:0005829]; early endosome membrane [GO:0031901]; endosome [GO:0005768]; endosome membrane [GO:0010008]; lamellipodium [GO:0030027]; lysosome [GO:0005764]; membrane [GO:0016020]; protein-containing complex [GO:0032991]; retromer, tubulation complex [GO:0030905]; retromer complex [GO:0030904]		2	3		46381.7	28412.2	26156.3	34707.2	46415.9	52505.1	41549.6	25676.2	29868.1	39644.7	63762.8	29861.6	24743.4	35448	41574.5	57394.6	31762.9	28435.8	29598.2	41847.2	44778.8	50162.5	27558.5	31514.4	35335
Dolichol-phosphate mannosyltransferase subunit 1 [OS=Homo sapiens]	O60762	O60762	O60762	SUBCELLULAR LOCATION: Endoplasmic reticulum.	dolichol-phosphate-mannose synthase complex [GO:0033185]; endoplasmic reticulum [GO:0005783]; endoplasmic reticulum membrane [GO:0005789]; membrane [GO:0016020]; nucleus [GO:0005634]			3	4	16647.6	11559.7	8591.32	9048.23	10369.6	7115.11	14934.2	9069.8	8578.64	10244.5	10795.2	9134.34	9332.29	9892.34	9084.68	6325.12	10027.3	8305.78	8319.93	6973.8	10709.8	13718.8	8674.84	10453.8	10412.2
General vesicular transport factor p115 [OS=Homo sapiens];Isoform 2 of General vesicular transport factor p115 [OS=Homo sapiens]	O60763-1;O60763-2	O60763-1;O60763-2	O60763	SUBCELLULAR LOCATION: Cytoplasm, cytosol {ECO:0000269|PubMed:19454686, ECO:0000269|PubMed:9478999}. Golgi apparatus membrane {ECO:0000269|PubMed:19454686, ECO:0000269|PubMed:9478999}; Peripheral membrane protein {ECO:0000269|PubMed:19454686, ECO:0000269|PubMed:9478999}. Note=Recycles between the cytosol and the Golgi apparatus during interphase. During interphase, the phosphorylated form is found…	cytosol [GO:0005829]; endoplasmic reticulum [GO:0005783]; ER to Golgi transport vesicle membrane [GO:0012507]; fibrillar center [GO:0001650]; Golgi apparatus [GO:0005794]; Golgi membrane [GO:0000139]; Golgi stack [GO:0005795]; membrane [GO:0016020]; perinuclear region of cytoplasm [GO:0048471]; transport vesicle [GO:0030133]		2	3	4	45362	25544.1	57791.1	76534	91376.3	167404	51386.1	61746.8	59752	80780.4	55747	54492.4	58201.1	45640.3	92460	84982.7	29536.2	63597.5	61091.1	68530.3	111075	73067.6	54791.6	77805.6	79332.8
28S ribosomal protein S14, mitochondrial [OS=Homo sapiens]	O60783	O60783	O60783	SUBCELLULAR LOCATION: Mitochondrion {ECO:0000269|PubMed:25838379}.	mitochondrial inner membrane [GO:0005743]; mitochondrial ribosome [GO:0005761]; mitochondrial small ribosomal subunit [GO:0005763]			3		14419.7	13309.2	6613.17	Filtered	118578	14518	6636.39	6567.41	47752.9	86121.2	12467.5	7808.91	5937.25	74303.1	104035	5827.28	7437.48	5284.49	4219.72	3606.56	9178.61	4850.9	5253.17	1126.1	2840.34
Target of Myb protein 1 [OS=Homo sapiens];Isoform 2 of Target of Myb protein 1 [OS=Homo sapiens]	O60784;O60784-2	O60784;O60784-2	O60784	SUBCELLULAR LOCATION: Cytoplasm {ECO:0000305}. Membrane {ECO:0000305}; Peripheral membrane protein {ECO:0000305}.	azurophil granule membrane [GO:0035577]; cytoplasm [GO:0005737]; cytosol [GO:0005829]; early endosome [GO:0005769]; endosome [GO:0005768]; extracellular exosome [GO:0070062]; membrane [GO:0016020]; plasma membrane [GO:0005886]; specific granule membrane [GO:0035579]		2	3		56515.3	20048.2	29218.5	24936	23976.2	35703.6	25829.9	26895.2	16178.8	23861.4	44492.1	18292.7	25798.3	14785	21646.5	41983.7	15440.3	27357.6	19892.2	25731.3	69173.8	16499	27382.3	22279.3	23687.8
Coiled-coil domain-containing protein 22 [OS=Homo sapiens]	O60826	O60826	O60826	SUBCELLULAR LOCATION: Endosome {ECO:0000305|PubMed:28892079}.	cytosol [GO:0005829]; endosome [GO:0005768]; nucleoplasm [GO:0005654]		2		4	4266.3	3209.26	5697.33	9707.44	7764.84	9244.61	4949.18	5813.81	6484.94	6815.36	3283.04	5274.76	5660.38	5678.01	9811.17	4160.47	5420.93	3993.47	5849.7	7181.28	5222.17	5500.26	6289.25	6922.06	6907.17
PRA1 family protein 2 [OS=Homo sapiens]	O60831	O60831	O60831	SUBCELLULAR LOCATION: Endosome membrane {ECO:0000305|PubMed:17975142}; Multi-pass membrane protein {ECO:0000305|PubMed:17975142}.	endosome membrane [GO:0010008]; integral component of membrane [GO:0016021]			3		25271.5	19081	14060.8	18024	20184.1	Filtered	18454	10026.9	22281.4	21193.7	21747.2	12414.6	2053.97	12132.6	18040.5	12604.2	Filtered	10466.9	23191.1	19029.5	36665.6	28013	21021.1	35431.6	31277.4
H/ACA ribonucleoprotein complex subunit 4 [OS=Homo sapiens]	O60832-1	O60832-1	O60832	SUBCELLULAR LOCATION: Isoform 1: Nucleus, nucleolus {ECO:0000269|PubMed:10556300, ECO:0000269|PubMed:10591218, ECO:0000269|PubMed:12429849}. Nucleus, Cajal body {ECO:0000250|UniProtKB:P40615}. Note=Also localized to Cajal bodies (coiled bodies). {ECO:0000250|UniProtKB:P40615}.; SUBCELLULAR LOCATION: Isoform 3: Cytoplasm {ECO:0000269|PubMed:21820037}.	box H/ACA scaRNP complex [GO:0072589]; box H/ACA snoRNP complex [GO:0031429]; box H/ACA telomerase RNP complex [GO:0090661]; cytoplasm [GO:0005737]; fibrillar center [GO:0001650]; nucleolus [GO:0005730]; nucleoplasm [GO:0005654]; nucleus [GO:0005634]; telomerase holoenzyme complex [GO:0005697]		2		4	Filtered	Filtered	6588.71	Filtered	3004.79	Filtered	Filtered	8190.94	4865.75	4084.33	Filtered	5906.69	6100.38	Filtered	Filtered	15690.4	5908.05	6971.07	4527.83	5225.38	35704.1	13258.6	9560.69	5619.62	7337.66
Eukaryotic translation initiation factor 5B [OS=Homo sapiens]	O60841	O60841	O60841	SUBCELLULAR LOCATION: Cytoplasm {ECO:0000250|UniProtKB:Q05D44}.	cytoplasm [GO:0005737]; cytosol [GO:0005829]		2			Filtered	3728.49	11155.4	9521.7	8581.98	11299.4	8150.38	9099.65	9061.98	10187	Filtered	3928.77	8626.31	4941.12	11242.9	Filtered	4313.17	8816.03	9274.59	8462.79	Filtered	Filtered	9874.8	9993.81	9565.76
Endothelial differentiation-related factor 1 [OS=Homo sapiens];Isoform 2 of Endothelial differentiation-related factor 1 [OS=Homo sapiens];Isoform 3 of Endothelial differentiation-related factor 1 [OS=Homo sapiens]	O60869-1;O60869-2;O60869-3	O60869-1;O60869-2;O60869-3	O60869	SUBCELLULAR LOCATION: Cytoplasm. Nucleus. Note=Also nuclear upon binding to NR5A1 and treatment of cells with TPA or forskolin.	cytoplasm [GO:0005737]; cytosol [GO:0005829]; intracellular [GO:0005622]; nucleolus [GO:0005730]; nucleus [GO:0005634]		2		4	40402.8	25995.5	15690.3	13226.4	22183.3	30144	52849.1	20502.6	24649.5	18921.6	71527.7	30186.6	18832.8	34174.4	18104.1	20704.2	29422.8	16983.6	17692.3	15488.9	36482.6	30215.7	13450.9	13376.6	14879.4
Protein diaphanous homolog 2 [OS=Homo sapiens];Isoform 2 of Protein diaphanous homolog 2 [OS=Homo sapiens];Isoform 3 of Protein diaphanous homolog 2 [OS=Homo sapiens]	O60879;O60879-2;O60879-3	O60879;O60879-2;O60879-3	O60879	SUBCELLULAR LOCATION: Isoform 3: Cytoplasm, cytosol. Early endosome. Note=Isoform 3 is cytosolic but when coexpressed with RHOD, the 2 proteins colocalize to early endosomes.	cytosol [GO:0005829]; early endosome [GO:0005769]; endoplasmic reticulum [GO:0005783]; intracellular membrane-bounded organelle [GO:0043231]; nucleolus [GO:0005730]		2	3	4	Filtered	Filtered	1944.84	1811.38	3309.4	Filtered	Filtered	1783.54	1496.47	2601.73	Filtered	2798.82	1860.47	Filtered	2649.59	Filtered	Filtered	930.182	2120.59	3171.28	Filtered	Filtered	1763.59	2457.96	Filtered
DnaJ homolog subfamily A member 2 [OS=Homo sapiens]	O60884	O60884	O60884	SUBCELLULAR LOCATION: Membrane {ECO:0000305}; Lipid-anchor {ECO:0000305}.	cytosol [GO:0005829]; extracellular exosome [GO:0070062]; membrane [GO:0016020]		2	3		30812.2	7461.86	17455.8	21493	6258.39	8069.98	8643.47	11412.1	20789.1	10027.6	48524.8	19773.4	11978.1	30529.7	20920	11162.1	16007.1	16137.2	21412.5	11063.2	13175.2	33111.1	11734	17078.5	17358.1
Protein CutA [OS=Homo sapiens];Isoform A of Protein CutA [OS=Homo sapiens];Isoform C of Protein CutA [OS=Homo sapiens]	O60888-1;O60888-2;O60888-3	O60888-1;O60888-2;O60888-3	O60888	0	extracellular exosome [GO:0070062]; membrane [GO:0016020]			3		88144.4	51185.4	12669.1	54970.5	56673.8	81905.6	93032.3	13560.8	55675.7	52560.1	113123	53674	16854	71740.1	41691.8	122152	49665.1	17883.8	49587.9	44653.4	111358	84070.9	24334.6	61291.6	45810.4
prefoldin subunit 1 [OS=Homo sapiens]	O60925	O60925	O60925	0	prefoldin complex [GO:0016272]					Filtered	19086.5	9475.25	14633.3	16739	9176.64	23967.1	13667.3	14691.7	16513.8	Filtered	14692.5	11034.1	14563.9	17581.2	Filtered	28883.6	9277.88	15781.1	16261.4	19985.4	31838.6	19773.4	18819	16939.3
Isoform 1 of Nucleolar protein 3 [OS=Homo sapiens];Nucleolar protein 3 [OS=Homo sapiens];Isoform 3 of Nucleolar protein 3 [OS=Homo sapiens]	O60936-1;O60936-2;O60936-3	O60936-1;O60936-2;O60936-3	O60936	SUBCELLULAR LOCATION: Isoform 1: Nucleus, nucleolus {ECO:0000269|PubMed:10196175}. Note=The SR-rich C-terminus mediates nuclear localization. {ECO:0000269|PubMed:10196175}.; SUBCELLULAR LOCATION: Isoform 3: Cytoplasm {ECO:0000305}.; SUBCELLULAR LOCATION: Isoform 2: Cytoplasm {ECO:0000269|PubMed:10196175}. Mitochondrion {ECO:0000250|UniProtKB:Q62881}. Sarcoplasmic reticulum {ECO:0000250|UniProtKB:…	cytoplasm [GO:0005737]; cytosol [GO:0005829]; membrane [GO:0016020]; mitochondrion [GO:0005739]; nucleolus [GO:0005730]; sarcoplasmic reticulum [GO:0016529]		2	3	4	Filtered	8887.39	3905.94	4703.58	4502.74	10504.2	8059.27	3612.92	3188.04	4111.57	8897.27	3075.88	3568.66	3331.83	1538.06	8641.89	3341.65	3794.7	3198.29	2311.64	16639.4	7473.45	4945	3623.54	4011.24
ATP-binding cassette sub-family B member 7, mitochondrial [OS=Homo sapiens];Isoform 2 of ATP-binding cassette sub-family B member 7, mitochondrial [OS=Homo sapiens]	O75027-1;O75027-2	O75027-1;O75027-2	O75027	SUBCELLULAR LOCATION: Mitochondrion inner membrane {ECO:0000305}; Multi-pass membrane protein {ECO:0000255|PROSITE-ProRule:PRU00441}.	integral component of membrane [GO:0016021]; mitochondrial inner membrane [GO:0005743]			3		6759.79	6729.21	13360.3	6761.51	25159.8	16130.1	36093.2	11116.3	19820.9	15069.4	15208.4	11143.7	12533.8	16138.6	18324.9	20012	6512.62	11305.3	7473.9	7172.56	37274.4	28352	10961.6	6229.49	13151.7
WD repeat-containing protein 1 [OS=Homo sapiens]	O75083	O75083	O75083	SUBCELLULAR LOCATION: Cytoplasm, cytoskeleton {ECO:0000250|UniProtKB:Q5RKI0}. Cell projection, podosome {ECO:0000269|PubMed:22721921}. Cell junction {ECO:0000269|PubMed:25792565}.	actomyosin, actin portion [GO:0042643]; cell-cell junction [GO:0005911]; cell junction [GO:0030054]; cell projection [GO:0042995]; cortical actin cytoskeleton [GO:0030864]; cytosol [GO:0005829]; extracellular exosome [GO:0070062]; extracellular region [GO:0005576]; plasma membrane [GO:0005886]; podosome [GO:0002102]		2	3		90681.6	68738.9	128421	93957.8	122159	163514	86898.1	129380	79231.9	117392	116296	78296	118712	74619.2	124298	176858	70917	115957	86624.3	81002.6	200547	192116	142136	125581	115077
Rho-associated protein kinase 2 [OS=Homo sapiens]	O75116	O75116	O75116	SUBCELLULAR LOCATION: Cytoplasm. Cell membrane {ECO:0000250}; Peripheral membrane protein {ECO:0000250}. Nucleus. Cytoplasm, cytoskeleton, microtubule organizing center, centrosome. Note=Cytoplasmic, and associated with actin microfilaments and the plasma membrane. {ECO:0000250}.	centrosome [GO:0005813]; cytoplasmic ribonucleoprotein granule [GO:0036464]; cytosol [GO:0005829]; nucleus [GO:0005634]; plasma membrane [GO:0005886]		2	3	4	Filtered	9557.34	4758.85	5199.35	6879.95	Filtered	Filtered	5859.62	5455.9	5547.74	Filtered	1510.72	5107.24	4973.71	6459.87	Filtered	5527.37	6207.94	6493.08	5963.14	Filtered	12356.7	8433.52	7096.12	7490.8
Copine-3 [OS=Homo sapiens]	O75131	O75131	O75131	SUBCELLULAR LOCATION: Nucleus {ECO:0000269|PubMed:20010870, ECO:0000269|PubMed:21087455}. Cytoplasm {ECO:0000269|PubMed:12949241, ECO:0000269|PubMed:20010870, ECO:0000269|PubMed:21087455}. Cell membrane {ECO:0000269|PubMed:20010870, ECO:0000269|PubMed:21087455}. Cell junction {ECO:0000269|PubMed:20010870}. Cell junction, focal adhesion {ECO:0000269|PubMed:20010870}. Note=Associates to the membran…	azurophil granule membrane [GO:0035577]; cell junction [GO:0030054]; cytoplasm [GO:0005737]; cytosol [GO:0005829]; extracellular exosome [GO:0070062]; focal adhesion [GO:0005925]; mitochondrion [GO:0005739]; nucleolus [GO:0005730]; nucleus [GO:0005634]; plasma membrane [GO:0005886]		2	3	4	60260.6	77834.6	103623	156360	188252	90278.4	129703	111574	136445	169587	46926.5	108545	105959	127591	191694	85525.2	83905.9	111798	164815	167876	108868	170821	110460	163245	136538
Huntingtin-interacting protein 1-related protein [OS=Homo sapiens]	O75146	O75146	O75146	SUBCELLULAR LOCATION: Cytoplasm, perinuclear region. Endomembrane system. Cytoplasmic vesicle, clathrin-coated vesicle membrane. Note=Membrane-associated protein, mainly localized at the endocytic compartments and in the perinuclear region.	actin cortical patch [GO:0030479]; apical plasma membrane [GO:0016324]; clathrin-coated pit [GO:0005905]; clathrin-coated vesicle [GO:0030136]; clathrin-coated vesicle membrane [GO:0030665]; cytosol [GO:0005829]; dendrite cytoplasm [GO:0032839]; dendritic spine [GO:0043197]; intracellular membrane-bounded organelle [GO:0043231]; mitochondrion [GO:0005739]; neuronal cell body [GO:0043025]; perinuc…		2	3	4	Filtered	Filtered	4313.14	Filtered	Filtered	Filtered	Filtered	3678.45	Filtered	Filtered	Filtered	Filtered	4333.51	Filtered	Filtered	4160.08	Filtered	4501.92	1125.01	Filtered	Filtered	Filtered	2691.74	1217.84	1593
Clustered mitochondria protein homolog [OS=Homo sapiens]	O75153	O75153	O75153	SUBCELLULAR LOCATION: Cytoplasm {ECO:0000255|HAMAP-Rule:MF_03013}. Cytoplasmic granule {ECO:0000269|PubMed:25349259}. Note=A fraction colocalizes with tyrosinated tubulin and can be detected close to mitochondria. {ECO:0000269|PubMed:25349259}.	cytoplasm [GO:0005737]		2			31734.1	25564.6	29746.7	36150.6	40612.5	36864.6	40721.9	28016.5	33442.6	38011.1	35810.7	31854.8	26870	27851.7	40062.3	35097.3	34653.8	25284.5	36640.5	40241	41170.4	50301.4	25128.4	34567.6	32226.3
DnaJ homolog subfamily C member 13 [OS=Homo sapiens]	O75165	O75165	O75165	SUBCELLULAR LOCATION: Early endosome {ECO:0000269|PubMed:18256511}. Early endosome membrane {ECO:0000305}; Peripheral membrane protein {ECO:0000269|PubMed:18256511}. Endosome membrane {ECO:0000269|PubMed:24643499}.	azurophil granule membrane [GO:0035577]; cytosol [GO:0005829]; early endosome membrane [GO:0031901]; endosome membrane [GO:0010008]; extracellular exosome [GO:0070062]; intracellular membrane-bounded organelle [GO:0043231]; lysosomal membrane [GO:0005765]; membrane [GO:0016020]; plasma membrane [GO:0005886]; secretory granule membrane [GO:0030667]		2	3		6511.99	6426.46	10322.2	8903.53	7672.26	Filtered	13858.8	8312.78	7279.94	8167.71	Filtered	7014.86	7885.28	9001.85	8860.85	Filtered	8012.64	9195.06	9748.97	9811.99	Filtered	11714.5	10642.5	10099.8	9068.96
Serine/threonine-protein phosphatase 6 regulatory subunit 2 [OS=Homo sapiens];Isoform 2 of Serine/threonine-protein phosphatase 6 regulatory subunit 2 [OS=Homo sapiens];Isoform 3 of Serine/threonine-protein phosphatase 6 regulatory subunit 2 [OS=Homo sapiens];Isoform 4 of Serine/threonine-protein phosphatase 6 regulatory subunit 2 [OS=Homo sapiens];Isoform 5 of Serine/threonine-protein phosphatas…	O75170;O75170-2;O75170-3;O75170-4;O75170-5;O75170-6	O75170;O75170-2;O75170-3;O75170-4;O75170-5;O75170-6	O75170	SUBCELLULAR LOCATION: Cytoplasm {ECO:0000269|PubMed:16769727}.	cytosol [GO:0005829]; intracellular membrane-bounded organelle [GO:0043231]		2	3		Filtered	Filtered	6567.52	Filtered	Filtered	Filtered	Filtered	8214.02	Filtered	Filtered	Filtered	Filtered	4933.07	Filtered	Filtered	Filtered	Filtered	697.537	Filtered	9395.08	Filtered	Filtered	6391	Filtered	Filtered
xylulose kinase [OS=Homo sapiens]	O75191	O75191	O75191	0	cytoplasm [GO:0005737]; cytosol [GO:0005829]		2			16566.5	9215.67	13756.9	9178.1	5547.7	16705.3	8713.57	10173.3	6663.44	10436.2	20358.3	9762.21	6904.56	5386.65	8842.34	31778.3	7136.59	7679.58	8438.9	8992.21	18574.3	12412.7	6181.5	9320.62	8211.35
Ubiquinone biosynthesis protein COQ9, mitochondrial [OS=Homo sapiens]	O75208-1	O75208-1	O75208	SUBCELLULAR LOCATION: Mitochondrion {ECO:0000250|UniProtKB:Q8K1Z0}.	mitochondrial inner membrane [GO:0005743]; mitochondrion [GO:0005739]			3		11272.3	21733	16867.4	10850.2	11427.6	14388.3	20223.6	20883.7	9774.7	9429.46	16645.4	18044.7	21693.2	8786.89	10039.5	16701.7	17490.5	21293.9	11389.8	10381	27898.5	26179.6	19268.5	14239.8	15577.6
gamma-glutamylcyclotransferase [OS=Homo sapiens]	O75223-1	O75223-1	O75223	0	cytosol [GO:0005829]; extracellular exosome [GO:0070062]		2			3631.78	15857.1	9864.25	10256.4	6406.9	Filtered	22301.1	12680	5970.51	7947.21	Filtered	12310.4	11962	15866.2	5591.73	Filtered	8888.42	8836.8	5588.78	8284.65	Filtered	13173.1	16058.4	11497.5	5504.29
NADH dehydrogenase [ubiquinone] iron-sulfur protein 7, mitochondrial [OS=Homo sapiens]	O75251	O75251	O75251	SUBCELLULAR LOCATION: Mitochondrion {ECO:0000305|PubMed:12611891}.	mitochondrial matrix [GO:0005759]; mitochondrial respiratory chain complex I [GO:0005747]; neuronal cell body [GO:0043025]; neuron projection [GO:0043005]; synaptic membrane [GO:0097060]			3		34247.7	28766.6	41069.3	25240.1	30333.7	48890.3	50069.5	32840.6	30864.4	28678.2	37542.7	42109.5	35583.1	36999.1	31331.5	18588	27415.5	33177.3	31179.3	27000.2	70456.9	60364.1	31028.5	31535	32294.4
NADH dehydrogenase [ubiquinone] iron-sulfur protein 2, mitochondrial [OS=Homo sapiens]	O75306-1	O75306-1	O75306	SUBCELLULAR LOCATION: Mitochondrion inner membrane {ECO:0000269|PubMed:12611891, ECO:0000269|PubMed:9585441}; Peripheral membrane protein {ECO:0000269|PubMed:12611891}; Matrix side {ECO:0000269|PubMed:12611891}.	mitochondrial matrix [GO:0005759]; mitochondrial respiratory chain complex I [GO:0005747]; mitochondrion [GO:0005739]; nucleoplasm [GO:0005654]				4	44007.1	38933.2	44580.9	58094.1	65079.8	46247.5	69363.4	41029.3	69482.9	61490.3	23291.3	67604.4	38764.9	69233	72559.5	22587.5	48498.6	33848.4	62283.1	53875	47818.7	75493.2	39214.2	57840.2	51844.6
programmed cell death protein 6 [OS=Homo sapiens]	O75340	O75340	O75340	SUBCELLULAR LOCATION: Endoplasmic reticulum membrane {ECO:0000269|PubMed:16957052, ECO:0000269|PubMed:27813252}; Peripheral membrane protein {ECO:0000269|PubMed:16957052}. Cytoplasmic vesicle, COPII-coated vesicle membrane {ECO:0000269|PubMed:27716508}. Cytoplasm {ECO:0000269|PubMed:27716508, ECO:0000269|PubMed:27784779}. Nucleus {ECO:0000269|PubMed:17045351, ECO:0000269|PubMed:21122810, ECO:0000…	COPII vesicle coat [GO:0030127]; cytoplasm [GO:0005737]; cytoplasmic vesicle [GO:0031410]; endoplasmic reticulum [GO:0005783]; endoplasmic reticulum exit site [GO:0070971]; endoplasmic reticulum membrane [GO:0005789]; endosome [GO:0005768]; extracellular exosome [GO:0070062]; Golgi membrane [GO:0000139]; nucleus [GO:0005634]		2	3	4	37615.5	34614	21555.2	29144.2	31710	50849.4	48484	23821.4	30815.6	27218.9	40723	33747.5	23850.8	42893.8	31636.4	24211.5	26600.4	24396.3	27500.3	23010.2	68362.3	59394.4	27290.8	33167.3	30425.2
Tubulin-specific chaperone A [OS=Homo sapiens]	O75347	O75347	O75347	SUBCELLULAR LOCATION: Cytoplasm, cytoskeleton.	cytoplasm [GO:0005737]; microtubule [GO:0005874]; microtubule cytoskeleton [GO:0015630]; nucleolus [GO:0005730]		2		4	66561	159699	176472	108511	85158.8	108045	92891	30098.2	107184	81351.2	72846.1	69107.7	38625.7	123909	81768.9	72770.3	57327.9	34639.2	97540.8	76685.4	101709	74995.2	48247.8	94642.1	60266.9
V-type proton ATPase subunit G 1 [OS=Homo sapiens]	O75348	O75348	O75348	0	cytosol [GO:0005829]; extracellular exosome [GO:0070062]; lysosomal membrane [GO:0005765]; plasma membrane [GO:0005886]; vacuolar proton-transporting V-type ATPase complex [GO:0016471]		2	3		35179.6	27802.2	34072.2	38466.5	39161.6	41802.2	60827.1	26021.6	39697.9	39975.9	30160.4	29007.7	18569.6	49878.1	42293.1	35917.7	46479.6	28037.4	39052.4	39071.5	53895.7	52152.5	33636.3	44627.2	42415.4
Vacuolar protein sorting-associated protein 4B [OS=Homo sapiens]	O75351	O75351	O75351	SUBCELLULAR LOCATION: Prevacuolar compartment membrane; Peripheral membrane protein. Late endosome membrane {ECO:0000305}; Peripheral membrane protein {ECO:0000305}. Note=Membrane-associated in the prevacuolar endosomal compartment. Localized in HIV-1 particles purified from acutely infected cells.	centrosome [GO:0005813]; cytoplasm [GO:0005737]; cytosol [GO:0005829]; endosome [GO:0005768]; endosome membrane [GO:0010008]; extracellular exosome [GO:0070062]; Flemming body [GO:0090543]; late endosome membrane [GO:0031902]; nucleus [GO:0005634]; spindle pole [GO:0000922]		2	3	4	14867.2	12687.1	21527.8	11650	14943.3	24090.6	23986.2	17281.1	8282.26	14588.4	19105.7	9981.08	16042.6	15276.6	13656.7	36097.5	18342.9	17420.1	12092.6	13058.9	13435.6	13555.1	21999.1	13955.1	12777.9
Mannose-P-dolichol utilization defect 1 protein [OS=Homo sapiens];Isoform 2 of Mannose-P-dolichol utilization defect 1 protein [OS=Homo sapiens]	O75352;O75352-2	O75352;O75352-2	O75352	SUBCELLULAR LOCATION: Membrane {ECO:0000305}; Multi-pass membrane protein {ECO:0000305}.	endoplasmic reticulum membrane [GO:0005789]; integral component of membrane [GO:0016021]; membrane [GO:0016020]			3		2541129	1560976	990303	1524.3	52160.4	27994.1	76465.4	273434	16943.2	1.06861e+06	19974	59534.5	205153	50859.4	17044.8	1206.09	771753	18476	157821	4681.82	46606.4	41642.6	309103	1365.41	70428.3
Ectonucleoside triphosphate diphosphohydrolase 5 [OS=Homo sapiens]	O75356	O75356	O75356	SUBCELLULAR LOCATION: Endoplasmic reticulum {ECO:0000250}. Secreted {ECO:0000269|PubMed:10400613}.	endoplasmic reticulum [GO:0005783]; extracellular region [GO:0005576]					13028.6	11510.9	24328.1	29534.1	24958.6	34859.6	21693.2	23248.2	29581.1	21692.1	26714.6	16864.6	24089.6	21767.5	25936	29036.7	17565.8	26891	29445.3	17783.9	37353.9	21719.3	22532.8	30145.1	25019.1
Core histone macro-H2A.1 [OS=Homo sapiens];Isoform 3 of Core histone macro-H2A.1 [OS=Homo sapiens]	O75367-1;O75367-3	O75367-1;O75367-3	O75367	SUBCELLULAR LOCATION: Nucleus {ECO:0000269|PubMed:15621527, ECO:0000269|PubMed:15897469, ECO:0000269|PubMed:9634239}. Chromosome {ECO:0000269|PubMed:15621527, ECO:0000269|PubMed:15897469, ECO:0000269|PubMed:9634239}. Note=Enriched in inactive X chromosome chromatin and in senescence-associated heterochromatin. {ECO:0000269|PubMed:15621527, ECO:0000269|PubMed:15897469, ECO:0000269|PubMed:9634239}.	Barr body [GO:0001740]; condensed chromosome [GO:0000793]; extracellular exosome [GO:0070062]; nuclear chromatin [GO:0000790]; nuclear chromosome [GO:0000228]; nuclear chromosome, telomeric region [GO:0000784]; nucleolus [GO:0005730]; nucleosome [GO:0000786]; nucleus [GO:0005634]; pericentric heterochromatin [GO:0005721]; sex chromatin [GO:0001739]				4	22781.8	13538.7	21002.4	6527.67	10079.4	11264.8	17103.6	21372.8	7779.78	11992.2	14908.8	12980.6	19727.7	6537.2	9329.9	12281.6	16578.6	17448.3	8983.18	11425.4	40283.9	32971.2	36955.2	16759.1	18769.2
SH3 domain-binding glutamic acid-rich-like protein [OS=Homo sapiens]	O75368	O75368	O75368	0	cytoplasm [GO:0005737]; extracellular exosome [GO:0070062]; extracellular space [GO:0005615]; nucleus [GO:0005634]	1	2		4	15158.8	37307.2	19042	34453.2	36332.4	22751.4	60626.7	19013	41625.3	35732.1	42028.9	27783.9	18108.7	49675.2	34405.8	27730.2	31017.4	14574.2	39059.7	27104.5	83602.6	114089	40698.8	64904.4	47095.2
Filamin-B [OS=Homo sapiens];Isoform 2 of Filamin-B [OS=Homo sapiens];Isoform 9 of Filamin-B [OS=Homo sapiens]	O75369-1;O75369-2;O75369-9	O75369-1;O75369-2;O75369-9	O75369	SUBCELLULAR LOCATION: Isoform 1: Cytoplasm, cell cortex. Cytoplasm, cytoskeleton. Cytoplasm, cytoskeleton, stress fiber. Cytoplasm, myofibril, sarcomere, Z line. Note=In differentiating myotubes, isoform 1, isoform 2 and isoform 3 are localized diffusely throughout the cytoplasm with regions of enrichment at the longitudinal actin stress fiber. In differentiated tubes, isoform 1 is also detected …	actin cytoskeleton [GO:0015629]; brush border [GO:0005903]; cell cortex [GO:0005938]; cytoplasm [GO:0005737]; cytosol [GO:0005829]; extracellular exosome [GO:0070062]; focal adhesion [GO:0005925]; integral component of membrane [GO:0016021]; neuronal cell body [GO:0043025]; neuron projection [GO:0043005]; nucleus [GO:0005634]; phagocytic vesicle [GO:0045335]; plasma membrane [GO:0005886]; stress …		2	3	4	97910.3	91005.8	176076	185497	239092	212258	175150	169056	135666	225002	175896	141358	159039	134160	221214	223300	123938	162858	182715	217926	199686	264928	157699	201609	182338
NADH dehydrogenase [ubiquinone] iron-sulfur protein 6, mitochondrial [OS=Homo sapiens]	O75380	O75380	O75380	SUBCELLULAR LOCATION: Mitochondrion inner membrane {ECO:0000305|PubMed:12611891}; Peripheral membrane protein {ECO:0000305}; Matrix side {ECO:0000305}.	mitochondrial inner membrane [GO:0005743]; mitochondrial respiratory chain complex I [GO:0005747]			3		19137	11275	7789.79	26058.9	12994.3	27153.5	20801.5	6924.02	21714.3	7480.99	16100.9	18056	8145.68	26184.8	9908.25	10793.8	12410.4	8109.18	18189.5	10275	29699.2	22693.7	6293.31	17141	9935.18
Peroxisomal membrane protein PEX14 [OS=Homo sapiens];Isoform 2 of Peroxisomal membrane protein PEX14 [OS=Homo sapiens]	O75381-1;O75381-2	O75381-1;O75381-2	O75381	SUBCELLULAR LOCATION: Peroxisome membrane {ECO:0000269|PubMed:19197237}; Peripheral membrane protein {ECO:0000269|PubMed:19197237}; Cytoplasmic side {ECO:0000269|PubMed:19197237}.	fibrillar center [GO:0001650]; integral component of membrane [GO:0016021]; membrane [GO:0016020]; nucleus [GO:0005634]; peroxisomal importomer complex [GO:1990429]; peroxisomal membrane [GO:0005778]; peroxisome [GO:0005777]; protein-containing complex [GO:0032991]			3	4	6900.7	1892.55	3352.85	Filtered	Filtered	Filtered	Filtered	3037.63	Filtered	Filtered	3178.32	Filtered	3147.19	Filtered	Filtered	Filtered	Filtered	1204.44	Filtered	Filtered	Filtered	Filtered	2721.12	Filtered	Filtered
Large neutral amino acids transporter small subunit 3 [OS=Homo sapiens];Isoform 2 of Large neutral amino acids transporter small subunit 3 [OS=Homo sapiens]	O75387;O75387-2	O75387;O75387-2	O75387	SUBCELLULAR LOCATION: Membrane {ECO:0000305}; Multi-pass membrane protein {ECO:0000305}.	integral component of plasma membrane [GO:0005887]; plasma membrane [GO:0005886]			3		Filtered	Filtered	7302.1	Filtered	5471.39	Filtered	Filtered	Filtered	3682.96	Filtered	Filtered	Filtered	5534.75	7048.86	6829.77	Filtered	Filtered	4942.17	Filtered	7103.45	Filtered	Filtered	4797.52	Filtered	Filtered
citrate synthase, mitochondrial [OS=Homo sapiens]	O75390	O75390	O75390	SUBCELLULAR LOCATION: Mitochondrion matrix.	extracellular exosome [GO:0070062]; mitochondrial matrix [GO:0005759]; mitochondrion [GO:0005739]; nucleus [GO:0005634]				4	132237	84000.2	39981.3	91295.6	87962.4	153838	92207.5	41138.8	82523.2	82117.5	182167	82924.4	42146.4	111766	78805.5	139107	80053.6	51979.2	94721.8	76170.5	173562	123808	48560.3	77009	68883.3
Vesicle-trafficking protein SEC22b [OS=Homo sapiens]	O75396	O75396	O75396	SUBCELLULAR LOCATION: Endoplasmic reticulum membrane {ECO:0000250|UniProtKB:Q4KM74}; Single-pass type IV membrane protein {ECO:0000250|UniProtKB:Q4KM74}. Endoplasmic reticulum-Golgi intermediate compartment membrane {ECO:0000250|UniProtKB:Q4KM74}. Golgi apparatus, cis-Golgi network membrane {ECO:0000250|UniProtKB:Q4KM74}. Golgi apparatus, trans-Golgi network membrane {ECO:0000250|UniProtKB:Q4KM74…	endoplasmic reticulum [GO:0005783]; endoplasmic reticulum-Golgi intermediate compartment [GO:0005793]; endoplasmic reticulum-Golgi intermediate compartment membrane [GO:0033116]; endoplasmic reticulum membrane [GO:0005789]; ER to Golgi transport vesicle membrane [GO:0012507]; Golgi membrane [GO:0000139]; integral component of membrane [GO:0016021]; melanosome [GO:0042470]; phagocytic vesicle memb…			3		59139	14939.3	28595.2	68705.6	66152.6	168456	29862.2	34519	51870.7	59555.3	106160	28891	34174.6	45717.5	68237.8	81776	23816	33797.4	59401.8	59653.4	61762	23433.7	23338.1	46779.4	46346.8
pre-mRNA-processing factor 40 homolog A [OS=Homo sapiens];Isoform 2 of Pre-mRNA-processing factor 40 homolog A [OS=Homo sapiens];Isoform 3 of Pre-mRNA-processing factor 40 homolog A [OS=Homo sapiens]	O75400;O75400-2;O75400-3	O75400;O75400-2;O75400-3	O75400	SUBCELLULAR LOCATION: Nucleus speckle {ECO:0000250}. Nucleus matrix {ECO:0000269|PubMed:16391387}. Note=Colocalizes with AKAP8L in the nuclear matrix. {ECO:0000250}.	cytosol [GO:0005829]; membrane [GO:0016020]; nuclear matrix [GO:0016363]; nuclear speck [GO:0016607]; nucleoplasm [GO:0005654]; U1 snRNP [GO:0005685]; U2-type prespliceosome [GO:0071004]		2	3	4	Filtered	Filtered	4452.24	Filtered	6651.72	Filtered	Filtered	5990.39	Filtered	6048.63	Filtered	Filtered	5632.48	Filtered	7762.94	Filtered	Filtered	5166.97	Filtered	7414.28	Filtered	Filtered	5950.98	Filtered	Filtered
Metaxin-2 [OS=Homo sapiens];Isoform 2 of Metaxin-2 [OS=Homo sapiens]	O75431;O75431-2	O75431;O75431-2	O75431	SUBCELLULAR LOCATION: Mitochondrion outer membrane {ECO:0000269|PubMed:10381257}. Mitochondrion {ECO:0000269|PubMed:25997101}.	mitochondrial outer membrane [GO:0005741]; mitochondrion [GO:0005739]; nucleolus [GO:0005730]; SAM complex [GO:0001401]			3	4	18034.2	7778.98	9030.39	9590.75	12993.2	54873	11852	9236.43	6202.44	21091	20519.7	9826	10106.9	12533.9	7536.65	27077.9	7132.13	10614.2	5750.29	6821.41	61895.2	16051.3	10153.8	9135.89	9639.08
Vacuolar protein sorting-associated protein 26A [OS=Homo sapiens]	O75436-1	O75436-1	O75436	SUBCELLULAR LOCATION: Cytoplasm {ECO:0000269|PubMed:15078903}. Endosome membrane {ECO:0000269|PubMed:22431521}; Peripheral membrane protein {ECO:0000250|UniProtKB:P40336}. Early endosome {ECO:0000269|PubMed:15078903, ECO:0000269|PubMed:16190980, ECO:0000269|PubMed:16732284, ECO:0000269|PubMed:20682791}. Note=Localizes to tubular profiles adjacent to endosomes (PubMed:15078903). Predominantly foun…	cytosol [GO:0005829]; early endosome [GO:0005769]; endosome [GO:0005768]; endosome membrane [GO:0010008]; lysosome [GO:0005764]; retromer, cargo-selective complex [GO:0030906]; retromer complex [GO:0030904]; tubular endosome [GO:0097422]; vesicle [GO:0031982]		2	3		42137.7	20614.9	27641.2	33852.2	27066.9	20387.5	19140.3	25328.9	20177.8	28335.7	25185.7	23637.6	26022.2	27989.9	29114.5	48817.2	22497.7	25732.2	22215	28597.6	51617.7	26886.4	36861.6	31494.9	26985.2
NADH dehydrogenase [ubiquinone] 1 beta subcomplex subunit 1 [OS=Homo sapiens]	O75438	O75438	O75438	SUBCELLULAR LOCATION: Mitochondrion inner membrane {ECO:0000305|PubMed:12611891}; Single-pass membrane protein {ECO:0000255}; Matrix side {ECO:0000305}.	integral component of membrane [GO:0016021]; mitochondrial inner membrane [GO:0005743]; mitochondrial respiratory chain complex I [GO:0005747]; mitochondrion [GO:0005739]; nuclear speck [GO:0016607]			3	4	43295.3	40012.5	39974.1	31202.8	32181.2	25296.9	48704.7	39360.7	26168.2	32427.8	52581.6	40426.5	41090.1	27481.2	36038.3	53940.5	35311.1	40893.5	28098	31772.4	62286.6	43407	49485.7	25761.2	24156.5
mitochondrial-processing peptidase subunit beta [OS=Homo sapiens]	O75439	O75439	O75439	SUBCELLULAR LOCATION: Mitochondrion matrix {ECO:0000250}.	mitochondrial inner membrane [GO:0005743]; mitochondrial processing peptidase complex [GO:0017087]; mitochondrion [GO:0005739]			3		35100.8	23639.3	16902.6	27360.7	27832.9	30012.5	31676.6	20836.2	25215.9	24690.9	48119.6	29436.5	20193.7	36046	27701.2	32029.8	28049.3	21311.8	26989.2	27887.4	34185.2	44957.7	14458.5	19204.1	18026.1
Retinol dehydrogenase 16 [OS=Homo sapiens]	O75452	O75452	O75452	SUBCELLULAR LOCATION: Microsome membrane {ECO:0000269|PubMed:9677409}. Endoplasmic reticulum membrane {ECO:0000250|UniProtKB:O54909}; Single-pass membrane protein {ECO:0000305}.	endoplasmic reticulum membrane [GO:0005789]; integral component of membrane [GO:0016021]; intracellular membrane-bounded organelle [GO:0043231]			3		100212	126445	143668	171346	124522	81324.5	206776	139152	137387	109123	111337	156661	160167	175522	120580	83991.7	113685	149013	122680	121197	32510.9	51010.3	32195.5	37880.2	28259.3
erlin-1 [OS=Homo sapiens]	O75477	O75477	O75477	SUBCELLULAR LOCATION: Endoplasmic reticulum membrane {ECO:0000269|PubMed:11118313, ECO:0000269|PubMed:16835267, ECO:0000269|PubMed:19240031}; Single-pass type II membrane protein {ECO:0000269|PubMed:11118313, ECO:0000269|PubMed:16835267, ECO:0000269|PubMed:19240031}. Note=Associated with lipid raft-like domains of the endoplasmic reticulum membrane.	endoplasmic reticulum [GO:0005783]; endoplasmic reticulum membrane [GO:0005789]; integral component of membrane [GO:0016021]; protein-containing complex [GO:0032991]			3		15818	6461.43	17058.7	10962	10391.2	25126.8	12719	16764.4	8842.23	9158.31	Filtered	8267.44	16711.5	9163.19	9721.06	9516.76	10578.6	17973.1	9136.08	9532.73	30089.3	11038.9	20689.2	12476.4	12320.1
NADH dehydrogenase [ubiquinone] iron-sulfur protein 3, mitochondrial [OS=Homo sapiens]	O75489	O75489	O75489	SUBCELLULAR LOCATION: Mitochondrion inner membrane.	mitochondrial matrix [GO:0005759]; mitochondrial membrane [GO:0031966]; mitochondrial respiratory chain complex I [GO:0005747]; mitochondrion [GO:0005739]; nuclear body [GO:0016604]			3	4	106328	79136.8	72045.7	80144.4	85248	80779.5	115101	63547.9	77549.9	74143.6	88364.8	93714.1	65822.7	90267.6	81964.5	72864.9	80089.2	57653.3	74568.3	69951.6	143020	118119	67220	76444.1	67418.4
Serine/arginine-rich splicing factor 10 [OS=Homo sapiens];Isoform 2 of Serine/arginine-rich splicing factor 10 [OS=Homo sapiens];Isoform 3 of Serine/arginine-rich splicing factor 10 [OS=Homo sapiens];Isoform 4 of Serine/arginine-rich splicing factor 10 [OS=Homo sapiens];Isoform 5 of Serine/arginine-rich splicing factor 10 [OS=Homo sapiens];Isoform 6 of Serine/arginine-rich splicing factor 10 [OS=…	O75494-1;O75494-2;O75494-3;O75494-4;O75494-5;O75494-6	O75494-1;O75494-2;O75494-3;O75494-4;O75494-5;O75494-6	O75494	SUBCELLULAR LOCATION: Nucleus speckle {ECO:0000269|PubMed:11684676, ECO:0000269|PubMed:26876937}. Cytoplasm {ECO:0000269|PubMed:11684676}.	cytoplasm [GO:0005737]; cytosol [GO:0005829]; nuclear speck [GO:0016607]; nucleoplasm [GO:0005654]; nucleus [GO:0005634]		2		4	15602.5	10094.7	9347.74	13496	19175.1	19601.8	19782.4	7068.98	13879.6	15784.4	21690.1	14263.4	5852.77	15884.5	16512.2	10548.8	9810.13	8165.57	14834.4	15931.9	27157	24985.6	7212.62	16692.2	17104.6
Heat shock factor-binding protein 1 [OS=Homo sapiens]	O75506	O75506	O75506	SUBCELLULAR LOCATION: Nucleus.	cytoplasm [GO:0005737]; cytoskeleton [GO:0005856]; cytosol [GO:0005829]; nucleoplasm [GO:0005654]; nucleus [GO:0005634]		2		4	Filtered	Filtered	1173.74	Filtered	Filtered	Filtered	Filtered	969.138	Filtered	Filtered	Filtered	Filtered	582.325	Filtered	Filtered	Filtered	Filtered	536.539	Filtered	Filtered	Filtered	Filtered	667.095	Filtered	Filtered
Enoyl-CoA delta isomerase 2, mitochondrial [OS=Homo sapiens];Isoform 2 of Enoyl-CoA delta isomerase 2, mitochondrial [OS=Homo sapiens]	O75521;O75521-2	O75521;O75521-2	O75521	SUBCELLULAR LOCATION: Isoform 1: Mitochondrion {ECO:0000250}.; SUBCELLULAR LOCATION: Isoform 2: Peroxisome matrix.	cytosol [GO:0005829]; intracellular membrane-bounded organelle [GO:0043231]; membrane [GO:0016020]; mitochondrion [GO:0005739]; nucleoplasm [GO:0005654]; peroxisomal matrix [GO:0005782]; peroxisome [GO:0005777]		2	3	4	77392.5	77079.6	65299.4	77908.8	56973.7	93177.3	100625	61820.3	76036.5	52731.9	95789.2	81398	63652.9	85155	59598.2	83955.3	79152	66191.6	75873.3	58528.7	106181	103962	56684.9	69891.4	57131.5
Barrier-to-autointegration factor [OS=Homo sapiens]	O75531	O75531	O75531	SUBCELLULAR LOCATION: Barrier-to-autointegration factor: Nucleus {ECO:0000269|PubMed:16495336, ECO:0000269|PubMed:24600006}. Cytoplasm {ECO:0000269|PubMed:16495336, ECO:0000269|PubMed:24600006}. Chromosome {ECO:0000269|PubMed:16495336}. Nucleus envelope {ECO:0000269|PubMed:24600006}. Note=Significantly enriched at the nuclear inner membrane, diffusely throughout the nucleus during interphase and …	condensed chromosome [GO:0000793]; cytoplasm [GO:0005737]; cytosol [GO:0005829]; nuclear envelope [GO:0005635]; nucleoplasm [GO:0005654]; nucleus [GO:0005634]		2		4	4277.69	9099.8	6858.87	3315.59	5555.08	4024.72	15288.9	7626.31	5143.61	6486.56	Filtered	7122.67	8687.14	5903.07	5631.15	Filtered	5428.49	8988.66	5043.54	3561.69	5864.84	14933.9	14216.5	7322.22	7698.83
splicing factor 3B subunit 1 [OS=Homo sapiens]	O75533-1	O75533-1	O75533	SUBCELLULAR LOCATION: Nucleus {ECO:0000269|PubMed:27720643, ECO:0000269|PubMed:28541300}. Nucleus speckle. Note=During mitosis, transiently dispersed from the nuclear speckles to the cytoplasm.	catalytic step 2 spliceosome [GO:0071013]; nuclear speck [GO:0016607]; nucleoplasm [GO:0005654]; nucleus [GO:0005634]; spliceosomal complex [GO:0005681]; U11/U12 snRNP [GO:0034693]; U12-type spliceosomal complex [GO:0005689]; U2 snRNP [GO:0005686]; U2-type precatalytic spliceosome [GO:0071005]; U2-type prespliceosome [GO:0071004]				4	5929.11	3808.29	10677.6	6946.85	12586.3	20421.6	4737.8	10419.8	2910.68	9993.42	Filtered	7201.45	13651.1	1430.53	8431.88	9848.27	3954.37	14059.1	6396.06	12029	16753	2910.14	11060	9663.61	10850.7
cold shock domain-containing protein E1 [OS=Homo sapiens];Isoform 2 of Cold shock domain-containing protein E1 [OS=Homo sapiens];Isoform 3 of Cold shock domain-containing protein E1 [OS=Homo sapiens];Isoform 4 of Cold shock domain-containing protein E1 [OS=Homo sapiens]	O75534;O75534-2;O75534-3;O75534-4	O75534;O75534-2;O75534-3;O75534-4	O75534	SUBCELLULAR LOCATION: Cytoplasm.	CRD-mediated mRNA stability complex [GO:0070937]; cytosol [GO:0005829]; Golgi apparatus [GO:0005794]; plasma membrane [GO:0005886]		2	3		14787.7	13674	34570.6	35371.5	39826.2	32608.5	17090	29972.8	28429.2	37039.8	18736.8	14945.4	27653.1	20600.8	42624	31254.6	19042.2	25823.2	34147.5	34717.6	16054.1	8268.89	18863.9	23258.7	24866.4
Interferon-inducible double-stranded RNA-dependent protein kinase activator A [OS=Homo sapiens];Isoform 2 of Interferon-inducible double-stranded RNA-dependent protein kinase activator A [OS=Homo sapiens];Isoform 3 of Interferon-inducible double-stranded RNA-dependent protein kinase activator A [OS=Homo sapiens]	O75569-1;O75569-2;O75569-3	O75569-1;O75569-2;O75569-3	O75569	SUBCELLULAR LOCATION: Cytoplasm, perinuclear region. Cytoplasm.	cytoplasm [GO:0005737]; cytosol [GO:0005829]; membrane [GO:0016020]; nucleoplasm [GO:0005654]; perinuclear region of cytoplasm [GO:0048471]; RISC-loading complex [GO:0070578]		2	3	4	Filtered	Filtered	4394.34	Filtered	Filtered	572.365	Filtered	3981.72	Filtered	Filtered	Filtered	Filtered	3696.87	Filtered	Filtered	Filtered	Filtered	3666.86	1326.09	Filtered	Filtered	Filtered	4641.82	2078.6	Filtered
2-amino-3-ketobutyrate coenzyme A ligase, mitochondrial [OS=Homo sapiens];Isoform 2 of 2-amino-3-ketobutyrate coenzyme A ligase, mitochondrial [OS=Homo sapiens]	O75600-1;O75600-2	O75600-1;O75600-2	O75600	SUBCELLULAR LOCATION: Mitochondrion {ECO:0000250}. Nucleus {ECO:0000269|PubMed:17688197}. Note=Translocates to the nucleus upon cold and osmotic stress.	mitochondrial inner membrane [GO:0005743]; mitochondrion [GO:0005739]; nuclear speck [GO:0016607]; nucleoplasm [GO:0005654]			3	4	10679.4	18165.3	28371.8	10344.4	23658.3	19235.5	48698.4	33281.4	14451.2	22795.1	13872	12868	27849.6	10910.7	8450.95	21185.5	40153.9	21578.8	10136.4	8646.95	Filtered	Filtered	Filtered	Filtered	Filtered
Acyl-protein thioesterase 1 [OS=Homo sapiens];Isoform 2 of Acyl-protein thioesterase 1 [OS=Homo sapiens]	O75608;O75608-2	O75608;O75608-2	O75608	SUBCELLULAR LOCATION: Cytoplasm {ECO:0000250}.	cytoplasm [GO:0005737]; cytosol [GO:0005829]; extracellular exosome [GO:0070062]		2			117426	84023.8	50497.3	66707.3	68856.6	81246.5	105542	50452.4	61839.2	60976.4	124854	82619.1	50258.1	96355.6	67527.8	71784.8	78765.3	51922.8	61658.4	64452.7	161424	131975	65268.2	70478.9	57604
Protein CREG1 [OS=Homo sapiens]	O75629	O75629	O75629	SUBCELLULAR LOCATION: Secreted {ECO:0000269|PubMed:10815803}.	azurophil granule lumen [GO:0035578]; extracellular exosome [GO:0070062]; extracellular region [GO:0005576]; extracellular space [GO:0005615]; transcription factor complex [GO:0005667]	1				34164.8	17845.6	6803.32	11481.8	13024.2	49236.2	55522.8	9607.37	16426.8	14371.3	55716.4	27638.4	7924.08	30457.5	15249.2	25559.6	8410.57	7271.08	12023.8	10526.2	58721.7	37058.6	10321.7	12083.6	13825.8
Ficolin-3 [OS=Homo sapiens];Isoform 2 of Ficolin-3 [OS=Homo sapiens]	O75636-1;O75636-2	O75636-1;O75636-2	O75636	SUBCELLULAR LOCATION: Secreted. Note=Found in blood plasma, bronchus, alveolus and bile duct.	blood microparticle [GO:0072562]; collagen trimer [GO:0005581]; extracellular region [GO:0005576]					5443.34	3453.5	2045.43	3619.57	Filtered	Filtered	28444	1140.71	3500.19	748.757	Filtered	Filtered	1230.32	Filtered	Filtered	Filtered	5903.23	1014.5	Filtered	3273.32	Filtered	Filtered	67013.7	Filtered	Filtered
U5 small nuclear ribonucleoprotein 200 kDa helicase [OS=Homo sapiens]	O75643-1	O75643-1	O75643	SUBCELLULAR LOCATION: Nucleus {ECO:0000269|PubMed:9539711}.	catalytic step 2 spliceosome [GO:0071013]; membrane [GO:0016020]; nucleoplasm [GO:0005654]; nucleus [GO:0005634]; post-mRNA release spliceosomal complex [GO:0071014]; spliceosomal complex [GO:0005681]; U4/U6 x U5 tri-snRNP complex [GO:0046540]; U5 snRNP [GO:0005682]			3	4	22595.4	4356.28	6982.11	5719.96	11897.7	10308.2	10122.8	7358.37	6328.46	9642.65	Filtered	4452.49	6413.01	4963.78	10496.5	7186.27	14547.1	6901.02	6118.82	8052.95	9612.31	11642.3	9540.21	11303.9	8939.11
TIP41-like protein [OS=Homo sapiens]	O75663	O75663	O75663	SUBCELLULAR LOCATION: Cytoplasm {ECO:0000269|PubMed:17944932}.	cytosol [GO:0005829]		2			Filtered	4731.28	7563.2	10151.9	4302.97	5050.68	5418.16	4412.14	5882.06	5123.27	2935.23	5408.67	6010.35	7018.06	5197.24	5388.38	4130.32	5973.26	3486.8	4790.87	4784.47	7039.36	4908.58	5466.75	5298.02
Oral-facial-digital syndrome 1 protein [OS=Homo sapiens];Isoform 2 of Oral-facial-digital syndrome 1 protein [OS=Homo sapiens];Isoform 3 of Oral-facial-digital syndrome 1 protein [OS=Homo sapiens]	O75665;O75665-2;O75665-3	O75665;O75665-2;O75665-3	O75665	SUBCELLULAR LOCATION: Cytoplasm, cytoskeleton, microtubule organizing center, centrosome, centriole {ECO:0000269|PubMed:12595504, ECO:0000269|PubMed:14654843, ECO:0000269|PubMed:20230748, ECO:0000269|PubMed:26643951}. Cytoplasm, cytoskeleton, cilium basal body {ECO:0000269|PubMed:17761535}. Nucleus {ECO:0000269|PubMed:17761535}. Cytoplasm, cytoskeleton, microtubule organizing center, centrosome, …	centriolar satellite [GO:0034451]; centriole [GO:0005814]; centrosome [GO:0005813]; ciliary basal body [GO:0036064]; cilium [GO:0005929]; cytosol [GO:0005829]; membrane [GO:0016020]; nucleus [GO:0005634]		2	3	4	Filtered	23959.1	26237	23267.4	21355.6	Filtered	36358	31411.3	22392.6	13413.3	14426	18113.8	23047.4	18490.1	24535.5	14600.9	25907.2	24908.2	20816.9	22546	29304.6	84782.5	38521.5	24477.4	19789.3
TOM1-like protein 1 [OS=Homo sapiens];Isoform 2 of TOM1-like protein 1 [OS=Homo sapiens]	O75674;O75674-2	O75674;O75674-2	O75674	SUBCELLULAR LOCATION: Golgi apparatus, Golgi stack. Endosome membrane {ECO:0000305}. Cytoplasm {ECO:0000250}. Membrane {ECO:0000250}; Peripheral membrane protein {ECO:0000250}; Cytoplasmic side {ECO:0000250}. Note=A small proportion is membrane-associated. {ECO:0000250}.	cytoplasm [GO:0005737]; cytosol [GO:0005829]; endosome [GO:0005768]; endosome membrane [GO:0010008]; extracellular exosome [GO:0070062]; Golgi stack [GO:0005795]; lysosome [GO:0005764]		2	3		25864.8	30936	39138.6	18068.9	21406.6	67129.8	Filtered	36116.9	12187.7	15775.3	9456.22	28304.7	36986.2	10181.1	20037.5	Filtered	26648.4	35936.4	18290.6	Filtered	Filtered	Filtered	32760.1	27111.4	14149
Protein phosphatase 1B [OS=Homo sapiens]	O75688	O75688	O75688	SUBCELLULAR LOCATION: Cytoplasm, cytosol {ECO:0000269|PubMed:22781750}. Membrane {ECO:0000250|UniProtKB:P36993}; Lipid-anchor {ECO:0000250|UniProtKB:P36993}. Note=Weakly associates at the membrane and N-myristoylation mediates the membrane localization. {ECO:0000250|UniProtKB:P36993}.	cytosol [GO:0005829]; membrane [GO:0016020]; nucleolus [GO:0005730]; nucleus [GO:0005634]		2	3	4	11638.3	14886.5	10153.8	35980	35996.5	56833.5	18560	15025.3	29914.5	35985.8	68845.3	17901.7	16576.5	43388.8	37945.4	34244.8	20416.5	15724.6	29685.6	34724.3	103360	7668.96	17666.4	38641.4	24082.2
Small subunit processome component 20 homolog [OS=Homo sapiens]	O75691	O75691	O75691	SUBCELLULAR LOCATION: Nucleus, nucleolus {ECO:0000269|PubMed:11790298, ECO:0000269|PubMed:12429849, ECO:0000269|PubMed:16458307}. Note=Colocalizes with NCL in the nucleolus.	90S preribosome [GO:0030686]; cytoplasm [GO:0005737]; nucleolus [GO:0005730]; nucleoplasm [GO:0005654]; plasma membrane [GO:0005886]; preribosome, small subunit precursor [GO:0030688]; small-subunit processome [GO:0032040]		2	3	4	17863.9	14216.7	13593.2	Filtered	Filtered	Filtered	21181.2	18424.2	Filtered	Filtered	13712.9	7624	17157.4	Filtered	Filtered	Filtered	20350.2	14968.8	Filtered	17165.3	Filtered	16644.3	17081.5	Filtered	Filtered
nuclear pore complex protein nup155 [OS=Homo sapiens];Isoform 2 of Nuclear pore complex protein Nup155 [OS=Homo sapiens]	O75694;O75694-2	O75694;O75694-2	O75694	SUBCELLULAR LOCATION: Nucleus, nuclear pore complex {ECO:0000250|UniProtKB:P37199}. Nucleus membrane {ECO:0000250|UniProtKB:P37199}; Peripheral membrane protein {ECO:0000250|UniProtKB:P37199}; Cytoplasmic side {ECO:0000250|UniProtKB:P37199}. Nucleus membrane {ECO:0000250|UniProtKB:P37199}; Peripheral membrane protein {ECO:0000250|UniProtKB:P37199}; Nucleoplasmic side {ECO:0000250|UniProtKB:P37199…	host cell [GO:0043657]; membrane [GO:0016020]; nuclear envelope [GO:0005635]; nuclear membrane [GO:0031965]; nuclear pore inner ring [GO:0044611]			3	4	Filtered	1916.21	4365.84	3603.08	3219.23	Filtered	Filtered	4473.81	1878.42	3073.65	Filtered	2275.08	5085.1	Filtered	3548.08	Filtered	Filtered	4360.8	2818.96	3594.45	Filtered	Filtered	6543.37	3950.28	3814.19
Eukaryotic translation initiation factor 3 subunit G [OS=Homo sapiens]	O75821	O75821	O75821	SUBCELLULAR LOCATION: Cytoplasm {ECO:0000255|HAMAP-Rule:MF_03006}. Nucleus {ECO:0000255|HAMAP-Rule:MF_03006, ECO:0000269|PubMed:17094969}. Cytoplasm, perinuclear region {ECO:0000255|HAMAP-Rule:MF_03006, ECO:0000269|PubMed:17094969}. Note=Colocalizes with AIFM1 in the nucleus and perinuclear region.	cytoplasm [GO:0005737]; cytosol [GO:0005829]; eukaryotic 43S preinitiation complex [GO:0016282]; eukaryotic 48S preinitiation complex [GO:0033290]; eukaryotic translation initiation factor 3 complex [GO:0005852]; perinuclear region of cytoplasm [GO:0048471]		2		4	12143.2	18799.3	22676.5	11199.3	13000.3	10533.5	33712.4	20464.7	10828	11745.6	10072.6	23891.6	20792	10881.4	18382.8	11598.7	19661.3	20140.1	11578.3	12688.1	8467.58	31108	18793.4	15785.7	10956
Eukaryotic translation initiation factor 3 subunit J [OS=Homo sapiens]	O75822	O75822	O75822	SUBCELLULAR LOCATION: Cytoplasm {ECO:0000255|HAMAP-Rule:MF_03009}.	cytosol [GO:0005829]; eukaryotic 43S preinitiation complex [GO:0016282]; eukaryotic 48S preinitiation complex [GO:0033290]; eukaryotic translation initiation factor 3 complex [GO:0005852]		2			10216.7	16587.4	25006.1	9368.84	13933.6	13153.6	34423.3	25198.1	12007.6	13117.8	8613.74	19717.6	26576.6	10266.7	12249.8	9124.66	31496.7	20186.6	11807.9	13764.8	19802.6	35579.4	19675.3	9773.41	12344.7
26S proteasome non-ATPase regulatory subunit 10 [OS=Homo sapiens]	O75832	O75832	O75832	SUBCELLULAR LOCATION: Cytoplasm {ECO:0000269|PubMed:18040287}. Nucleus {ECO:0000269|PubMed:18040287}.	cytoplasm [GO:0005737]; cytosol [GO:0005829]; intermediate filament cytoskeleton [GO:0045111]; nucleoplasm [GO:0005654]; nucleus [GO:0005634]; proteasome complex [GO:0000502]		2		4	8960.67	6401.31	10439.8	6524.73	6615.18	Filtered	8309.43	9365.71	5031.48	2460.41	50191.2	5358.45	6637.97	Filtered	2129.67	21545.3	20616.3	5812.17	6549.65	7249.1	46138.6	11034.6	6533.33	7603.89	7251.52
caax prenyl protease 1 homolog [OS=Homo sapiens]	O75844	O75844	O75844	SUBCELLULAR LOCATION: Endoplasmic reticulum membrane {ECO:0000269|PubMed:23539603}; Multi-pass membrane protein {ECO:0000269|PubMed:23539603}. Nucleus inner membrane {ECO:0000269|PubMed:23539603}; Multi-pass membrane protein {ECO:0000269|PubMed:23539603}.	extracellular exosome [GO:0070062]; integral component of endoplasmic reticulum membrane [GO:0030176]; membrane [GO:0016020]; nuclear inner membrane [GO:0005637]; protein-containing complex [GO:0032991]			3	4	3113.48	5186.49	13221.6	8768.74	6863.71	Filtered	11641.4	11787.1	8506.4	5227.97	Filtered	6798.47	12659.5	6263.36	7236.27	2097.49	8864.1	11651.7	8618.43	6689.15	Filtered	4292.74	9280.77	5544.42	3504.07
Isocitrate dehydrogenase [NADP] cytoplasmic [OS=Homo sapiens]	O75874	O75874	O75874	SUBCELLULAR LOCATION: Cytoplasm, cytosol {ECO:0000269|PubMed:10521434}. Peroxisome {ECO:0000269|PubMed:10521434}.	cytoplasm [GO:0005737]; cytosol [GO:0005829]; extracellular exosome [GO:0070062]; extracellular region [GO:0005576]; ficolin-1-rich granule lumen [GO:1904813]; mitochondrion [GO:0005739]; peroxisomal matrix [GO:0005782]; peroxisome [GO:0005777]; secretory granule lumen [GO:0034774]; tertiary granule lumen [GO:1904724]		2			361376	282723	342079	372925	407865	683338	499785	310509	321948	336840	400346	429903	317028	389616	375987	329904	367513	334295	348142	339233	424482	548895	274733	298467	295936
Protein SCO1 homolog, mitochondrial [OS=Homo sapiens]	O75880	O75880	O75880	SUBCELLULAR LOCATION: Mitochondrion {ECO:0000269|PubMed:9878253}. Mitochondrion inner membrane {ECO:0000269|PubMed:15229189}; Single-pass membrane protein {ECO:0000255}.	host cell mitochondrial intermembrane space [GO:0072492]; integral component of mitochondrial inner membrane [GO:0031305]; mitochondrion [GO:0005739]; myofibril [GO:0030016]			3		44818.6	42839.7	24525.8	19180.4	22390.8	30272	43667.3	32366.4	18040.5	18405.7	29492.2	33687.4	34522.3	18253.5	16907.4	34810.5	34585	30716.3	17292	17070.3	35688.2	41730.9	20464	12816.6	14343.6
25-hydroxycholesterol 7-alpha-hydroxylase [OS=Homo sapiens]	O75881	O75881	O75881	SUBCELLULAR LOCATION: Endoplasmic reticulum membrane; Peripheral membrane protein. Microsome membrane; Peripheral membrane protein.	endoplasmic reticulum membrane [GO:0005789]			3		Filtered	3851.01	4465.19	5041.18	8069.48	Filtered	Filtered	3688.5	5472.87	4540.37	11775.1	4089.66	3884	6447.2	3838.99	10145.2	2045.31	5591.5	7404.28	3712.33	8010.1	8475.8	4762.4	7510.8	6441.39
Putative hydrolase RBBP9 [OS=Homo sapiens];Isoform 2 of Putative hydrolase RBBP9 [OS=Homo sapiens]	O75884-1;O75884-2	O75884-1;O75884-2	O75884	SUBCELLULAR LOCATION: Cytoplasm {ECO:0000269|PubMed:12296629}. Nucleus {ECO:0000269|PubMed:12296629}.	cytoplasm [GO:0005737]; nucleoplasm [GO:0005654]		2		4	Filtered	Filtered	Filtered	1992.52	Filtered	Filtered	Filtered	Filtered	Filtered	Filtered	Filtered	15793.3	Filtered	2343.42	Filtered	Filtered	Filtered	1518.26	1424.36	1188.56	Filtered	Filtered	2245.13	2031.92	Filtered
Cytosolic 10-formyltetrahydrofolate dehydrogenase [OS=Homo sapiens];Isoform 3 of Cytosolic 10-formyltetrahydrofolate dehydrogenase [OS=Homo sapiens]	O75891-1;O75891-3	O75891-1;O75891-3	O75891	SUBCELLULAR LOCATION: Cytoplasm.	cytosol [GO:0005829]; extracellular exosome [GO:0070062]		2			253327	254506	173218	142126	373253	354570	385052	149168	290920	286489	403271	244839	160147	280262	308367	310158	241805	172235	97042.4	269558	103071	106177	55298	82003.4	88288.8
Diacylglycerol O-acyltransferase 1 [OS=Homo sapiens]	O75907	O75907	O75907	SUBCELLULAR LOCATION: Endoplasmic reticulum membrane {ECO:0000250|UniProtKB:Q9Z2A7}; Multi-pass membrane protein {ECO:0000250|UniProtKB:Q9Z2A7}.	endoplasmic reticulum membrane [GO:0005789]; integral component of membrane [GO:0016021]; plasma membrane [GO:0005886]; specific granule membrane [GO:0035579]			3		Filtered	7679.7	11436.3	8023.39	19647.1	Filtered	10414.2	10702.9	5410.97	6651.66	Filtered	8337.3	10672	7088.77	8459.49	Filtered	8118.18	11862.5	5565.09	6170.09	Filtered	10089.9	6817.84	7139.61	9476.8
Short-chain dehydrogenase/reductase 3 [OS=Homo sapiens]	O75911	O75911	O75911	SUBCELLULAR LOCATION: Membrane {ECO:0000305}; Multi-pass membrane protein {ECO:0000305}.	endoplasmic reticulum membrane [GO:0005789]; integral component of membrane [GO:0016021]; lipid droplet [GO:0005811]; photoreceptor outer segment membrane [GO:0042622]			3		3947.84	Filtered	5245.2	3591.02	5371.22	Filtered	Filtered	4579.94	6086.57	5396.84	Filtered	1656.67	54090.6	3783.33	7149.56	Filtered	1394.4	65540.3	6073.95	5876.2	Filtered	Filtered	29562.9	5353.87	5214.32
PRA1 family protein 3 [OS=Homo sapiens]	O75915	O75915	O75915	SUBCELLULAR LOCATION: Endoplasmic reticulum membrane {ECO:0000250|UniProtKB:Q9ES40}; Multi-pass membrane protein {ECO:0000255}. Cell membrane {ECO:0000250|UniProtKB:Q9ES40}; Multi-pass membrane protein {ECO:0000255}. Cytoplasm {ECO:0000250|UniProtKB:Q9ES40}. Cytoplasm, cytoskeleton {ECO:0000250|UniProtKB:Q9ES40}. Note=Also exists as a soluble form in the cytoplasm. Associated with microtubules. {…	cytoskeleton [GO:0005856]; endoplasmic reticulum membrane [GO:0005789]; integral component of membrane [GO:0016021]; membrane [GO:0016020]; plasma membrane [GO:0005886]			3		25009.4	14776.2	18719.9	22098.4	24044.2	23029.5	18442.1	15663.9	18698.7	22302.5	22611.3	12956.3	13738.1	22091.7	24651.3	20888.9	22006	17373.6	25095.7	24598.8	25703.2	15186.9	18347.5	24026.7	20564.7
dysferlin [OS=Homo sapiens];Isoform 10 of Dysferlin [OS=Homo sapiens];Isoform 11 of Dysferlin [OS=Homo sapiens];Isoform 12 of Dysferlin [OS=Homo sapiens];Isoform 13 of Dysferlin [OS=Homo sapiens];Isoform 14 of Dysferlin [OS=Homo sapiens];Isoform 15 of Dysferlin [OS=Homo sapiens];Isoform 2 of Dysferlin [OS=Homo sapiens];Isoform 3 of Dysferlin [OS=Homo sapiens];Isoform 4 of Dysferlin [OS=Homo sapie…	O75923-1;O75923-10;O75923-11;O75923-12;O75923-13;O75923-14;O75923-15;O75923-2;O75923-3;O75923-4;O75923-5;O75923-6;O75923-7;O75923-8;O75923-9	O75923-1;O75923-10;O75923-11;O75923-12;O75923-13;O75923-14;O75923-15;O75923-2;O75923-3;O75923-4;O75923-5;O75923-6;O75923-7;O75923-8;O75923-9	O75923	SUBCELLULAR LOCATION: Cell membrane, sarcolemma; Single-pass type II membrane protein. Cytoplasmic vesicle membrane {ECO:0000250}; Single-pass type II membrane protein {ECO:0000250}. Cell membrane. Note=Colocalizes, during muscle differentiation, with BIN1 in the T-tubule system of myotubules and at the site of contact between two myotubes or a myoblast and a myotube. Wounding of myotubes led to …	cytoplasmic vesicle membrane [GO:0030659]; early endosome [GO:0005769]; endocytic vesicle [GO:0030139]; endosome [GO:0005768]; extracellular exosome [GO:0070062]; Golgi apparatus [GO:0005794]; integral component of membrane [GO:0016021]; lamellipodium [GO:0030027]; late endosome [GO:0005770]; membrane microdomain [GO:0098857]; microtubule [GO:0005874]; microtubule organizing center [GO:0005815]; …		2	3	4	18011.3	5530.67	4886.25	6759.78	7129.33	6335.7	9674.01	8605.37	9225.79	5787.09	1810.88	6586.35	6030.58	6692.35	7465.68	2683.54	5999.01	4365.84	7609.54	8275.85	Filtered	7251.91	4975.59	5971.12	6681.62
Dynactin subunit 3 [OS=Homo sapiens];Isoform 2 of Dynactin subunit 3 [OS=Homo sapiens];Isoform 3 of Dynactin subunit 3 [OS=Homo sapiens]	O75935;O75935-2;O75935-3	O75935;O75935-2;O75935-3	O75935	SUBCELLULAR LOCATION: Cytoplasm {ECO:0000269|PubMed:9722614}. Cytoplasm, cytoskeleton, microtubule organizing center, centrosome {ECO:0000269|PubMed:9722614}. Chromosome, centromere, kinetochore {ECO:0000269|PubMed:9722614}. Cytoplasm, cytoskeleton, spindle {ECO:0000269|PubMed:9722614}. Cleavage furrow {ECO:0000269|PubMed:9722614}. Midbody {ECO:0000269|PubMed:9722614}. Note=Localizes to punctate …	centrosome [GO:0005813]; cleavage furrow [GO:0032154]; condensed chromosome kinetochore [GO:0000777]; cytosol [GO:0005829]; dynactin complex [GO:0005869]; microtubule [GO:0005874]; midbody [GO:0030496]; nucleolus [GO:0005730]; perinuclear region of cytoplasm [GO:0048471]; spindle [GO:0005819]		2		4	Filtered	3067.8	6095.42	14825.2	8333.1	Filtered	9556.97	5640.48	7380.24	10263	Filtered	10532.9	7342.53	Filtered	7689.7	Filtered	9793.78	9826.34	14426.5	11201.8	Filtered	11435.5	7034.84	22772.2	21258.9
gamma-butyrobetaine dioxygenase [OS=Homo sapiens]	O75936	O75936	O75936	SUBCELLULAR LOCATION: Cytoplasm.	cytosol [GO:0005829]; extracellular exosome [GO:0070062]; mitochondrion [GO:0005739]		2			47177.2	39035.8	21200.1	55603	58338.8	40792	46412.4	7243.63	46975.6	45799.9	51583.2	15832.8	8247.32	51458.5	31093.5	35484.6	27945.2	8544.73	43316.5	51328.7	Filtered	Filtered	Filtered	Filtered	3311.29
DnaJ homolog subfamily C member 8 [OS=Homo sapiens]	O75937	O75937	O75937	SUBCELLULAR LOCATION: Nucleus {ECO:0000269|PubMed:27133716}.	cytosol [GO:0005829]; intercellular bridge [GO:0045171]; nucleoplasm [GO:0005654]; nucleus [GO:0005634]		2		4	Filtered	1859.03	2869.93	1932.34	2206.35	Filtered	1576.52	2965.91	1935.08	2153.24	Filtered	Filtered	2717.51	1564.16	2239.92	Filtered	2495.06	1794.62	2048.65	2480.99	Filtered	Filtered	2959.32	2242.94	2459
ATP synthase subunit d, mitochondrial [OS=Homo sapiens]	O75947-1	O75947-1	O75947	SUBCELLULAR LOCATION: Mitochondrion. Mitochondrion inner membrane.	mitochondrial inner membrane [GO:0005743]; mitochondrial proton-transporting ATP synthase, stator stalk [GO:0000274]; mitochondrial proton-transporting ATP synthase complex [GO:0005753]; mitochondrion [GO:0005739]; nucleoplasm [GO:0005654]			3	4	44075	74447.5	87533	66440.1	58757.3	311808	170197	83839.8	66170.5	55388.6	62837.7	90965.1	96895	68787.5	61342.5	71820.6	84387.1	95118.6	69617.3	49680.4	126482	150590	84325.7	79902.7	62238.8
tetraspanin-9 [OS=Homo sapiens]	O75954	O75954	O75954	SUBCELLULAR LOCATION: Membrane {ECO:0000250}; Multi-pass membrane protein {ECO:0000250}. Note=Colocalizes with GP6 in tetraspanin microdomains on the platelet surface. {ECO:0000250}.	focal adhesion [GO:0005925]; integral component of plasma membrane [GO:0005887]; plasma membrane [GO:0005886]; tetraspanin-enriched microdomain [GO:0097197]			3		9967.56	6116.72	17806.6	17451.8	13656.3	11298	16050.1	16655.8	12709	17383.5	14669.9	16006.1	28974.5	13331.5	18384.2	11883.8	12544.9	15297.4	19334.2	19179.5	23598.6	14379.1	18817.2	20255	18516.3
Flotillin-1 [OS=Homo sapiens]	O75955	O75955	O75955	SUBCELLULAR LOCATION: Cell membrane; Peripheral membrane protein {ECO:0000269|PubMed:20682791}. Endosome {ECO:0000269|PubMed:20682791}. Membrane, caveola {ECO:0000250|UniProtKB:O08917}; Peripheral membrane protein {ECO:0000250|UniProtKB:O08917}. Melanosome {ECO:0000269|PubMed:17081065}. Membrane raft {ECO:0000269|PubMed:25893292}. Note=Identified by mass spectrometry in melanosome fractions from …	basolateral plasma membrane [GO:0016323]; caveola [GO:0005901]; cell-cell adherens junction [GO:0005913]; cell-cell contact zone [GO:0044291]; cell-cell junction [GO:0005911]; centriolar satellite [GO:0034451]; cytoplasmic vesicle [GO:0031410]; dopaminergic synapse [GO:0098691]; early endosome [GO:0005769]; endosome [GO:0005768]; external side of plasma membrane [GO:0009897]; extracellular exosom…		2	3		26134.8	19717.8	36620	46165	47972.8	60747	35192	30940.7	35392.2	41749.7	38256.5	27155	25596.2	41886.9	42558.1	38995.7	26100.7	30776.2	39961	46095.2	109704	70015.5	38472	56055.4	55181.8
ATP synthase subunit g, mitochondrial [OS=Homo sapiens]	O75964	O75964	O75964	SUBCELLULAR LOCATION: Mitochondrion. Mitochondrion inner membrane.	mitochondrial inner membrane [GO:0005743]; mitochondrial proton-transporting ATP synthase complex [GO:0005753]; mitochondrial proton-transporting ATP synthase complex, coupling factor F(o) [GO:0000276]; mitochondrion [GO:0005739]			3		65808.2	32375.6	17191.4	42821.4	44311.6	33482.3	43377.4	17851.6	40483.5	40672.3	45213.9	27452	18067.5	49648.9	44334.4	22683.6	35869.5	20669.3	37625.7	31835.5	52289.4	38541.1	17929.4	44747.6	42119.8
Carboxypeptidase D [OS=Homo sapiens]	O75976	O75976	O75976	SUBCELLULAR LOCATION: Cell membrane {ECO:0000250|UniProtKB:Q90240}; Single-pass type I membrane protein {ECO:0000255}.	extracellular exosome [GO:0070062]; extracellular space [GO:0005615]; integral component of membrane [GO:0016021]; membrane [GO:0016020]; plasma membrane [GO:0005886]	1		3		Filtered	Filtered	6711.55	6595.51	15093.1	Filtered	Filtered	1729.67	1391.34	14152.2	Filtered	9875.88	7583.91	715.213	18241.8	Filtered	3270.57	5582.17	6900.84	2881.74	Filtered	Filtered	2372.08	10312.4	8779.66
glutaredoxin-3 [OS=Homo sapiens]	O76003	O76003	O76003	SUBCELLULAR LOCATION: Cytoplasm, cytosol {ECO:0000305|PubMed:27519415}. Cytoplasm, cell cortex {ECO:0000269|PubMed:10636891}. Cytoplasm, myofibril, sarcomere, Z line {ECO:0000250|UniProtKB:Q9CQM9}. Note=Under the plasma membrane (By similarity). After PMA stimulation, GLRX3 and PRKCQ/PKC-theta translocate to a more extended submembrane area (By similarity). In the Z line, found associated with CS…	cell cortex [GO:0005938]; cytosol [GO:0005829]; dendrite [GO:0030425]; nucleus [GO:0005634]; Z disc [GO:0030018]		2		4	21630.7	37776.9	100248	88428.7	64851.9	14109.1	64452	70802.2	50110.7	61431.7	Filtered	68727.9	129966	72594.4	58218.7	10965.2	163316	115692	62693.9	67856.2	32334	11655.2	55902.5	69156.2	60554.3
Keratin, type I cuticular Ha6 [OS=Homo sapiens];Isoform 2 of Keratin, type I cuticular Ha6 [OS=Homo sapiens]	O76013-1;O76013-2	O76013-1;O76013-2	O76013	0	cytosol [GO:0005829]; extracellular exosome [GO:0070062]; intermediate filament [GO:0005882]		2			Filtered	Filtered	Filtered	Filtered	Filtered	25153.3	Filtered	Filtered	Filtered	Filtered	Filtered	2661.38	Filtered	Filtered	Filtered	Filtered	Filtered	Filtered	Filtered	Filtered	Filtered	Filtered	Filtered	Filtered	Filtered
Ribosomal L1 domain-containing protein 1 [OS=Homo sapiens]	O76021	O76021	O76021	SUBCELLULAR LOCATION: Nucleus, nucleolus {ECO:0000269|PubMed:11790298, ECO:0000269|PubMed:12429849, ECO:0000269|PubMed:18678645, ECO:0000269|PubMed:22419112}. Note=Colocalizes with ING1 in the nucleolus after UV stress. {ECO:0000269|PubMed:22419112}.	90S preribosome [GO:0030686]; membrane [GO:0016020]; nucleolus [GO:0005730]			3	4	Filtered	7090.34	17000.2	3907.25	7215.43	Filtered	10248.3	16180.3	5267.71	8856.63	Filtered	8570.03	17737.5	Filtered	6065.02	6106.93	7037.86	12141.5	4921.31	7710.4	Filtered	6127.57	11644.8	4625.06	5606.86
Annexin A9 [OS=Homo sapiens]	O76027	O76027	O76027	0	cell surface [GO:0009986]; cytosol [GO:0005829]		2			Filtered	Filtered	4429.99	Filtered	Filtered	9275.28	2205.81	4343.55	5578.94	7269.24	1.51551	1085.62	4263.05	4649.76	7403.44	Filtered	Filtered	5596.38	Filtered	Filtered	Filtered	Filtered	Filtered	5492.44	Filtered
ATP-dependent Clp protease ATP-binding subunit clpX-like, mitochondrial [OS=Homo sapiens]	O76031	O76031	O76031	SUBCELLULAR LOCATION: Mitochondrion. Mitochondrion matrix, mitochondrion nucleoid.	cytosol [GO:0005829]; endopeptidase Clp complex [GO:0009368]; mitochondrial endopeptidase Clp complex [GO:0009841]; mitochondrial inner membrane [GO:0005743]; mitochondrial matrix [GO:0005759]; mitochondrial nucleoid [GO:0042645]; mitochondrion [GO:0005739]; nucleoplasm [GO:0005654]		2	3	4	5608.1	5661.59	12303	Filtered	8303.99	16673.5	14712.2	12017.6	Filtered	3595.73	Filtered	6786.98	11504.6	1386.22	8866.1	16595.8	Filtered	13077.7	3632	5747.01	16056.4	Filtered	7842.42	4548.39	7641.29
Cyclin-dependent kinase-like 5 [OS=Homo sapiens];Isoform 2 of Cyclin-dependent kinase-like 5 [OS=Homo sapiens]	O76039-1;O76039-2	O76039-1;O76039-2	O76039	SUBCELLULAR LOCATION: Nucleus {ECO:0000269|PubMed:16935860}. Cytoplasm, cytoskeleton, cilium basal body {ECO:0000269|PubMed:29420175}. Cytoplasm, cytoskeleton, microtubule organizing center, centrosome {ECO:0000269|PubMed:29420175}.	centrosome [GO:0005813]; ciliary basal body [GO:0036064]; ciliary tip [GO:0097542]; cytosol [GO:0005829]; dendrite cytoplasm [GO:0032839]; dendritic growth cone [GO:0044294]; glutamatergic synapse [GO:0098978]; nucleoplasm [GO:0005654]; nucleus [GO:0005634]; perinuclear region of cytoplasm [GO:0048471]; postsynaptic density, intracellular component [GO:0099092]; ruffle membrane [GO:0032587]		2	3	4	Filtered	9392.72	7756.58	Filtered	Filtered	Filtered	Filtered	Filtered	Filtered	Filtered	Filtered	6062.08	6268.89	Filtered	Filtered	Filtered	Filtered	Filtered	3038.57	Filtered	Filtered	Filtered	Filtered	Filtered	Filtered
SEC14-like protein 2 [OS=Homo sapiens]	O76054	O76054	O76054	SUBCELLULAR LOCATION: Cytoplasm. Nucleus. Note=Cytoplasmic in absence of alpha-tocopherol, and nuclear in presence of alpha-tocopherol.	cytoplasm [GO:0005737]; cytosol [GO:0005829]; extracellular exosome [GO:0070062]; nucleus [GO:0005634]		2		4	63843.9	50788.7	74950.5	90249.7	96625.4	89682.8	73791.9	69488.1	79327.4	72035.5	77197.4	71967.9	71025.7	76112.1	92391	58832.6	44756.6	72478.3	72671	66035	46610.8	58043.6	30501.9	45806.1	39069.2
Delta(14)-sterol reductase [OS=Homo sapiens]	O76062	O76062	O76062	SUBCELLULAR LOCATION: Microsome membrane {ECO:0000250|UniProtKB:Q71KT5}; Multi-pass membrane protein {ECO:0000255}. Endoplasmic reticulum membrane {ECO:0000269|PubMed:9878250}; Multi-pass membrane protein {ECO:0000255}.	endoplasmic reticulum [GO:0005783]; endoplasmic reticulum membrane [GO:0005789]; integral component of endoplasmic reticulum membrane [GO:0030176]; integral component of plasma membrane [GO:0005887]; intracellular membrane-bounded organelle [GO:0043231]; nuclear inner membrane [GO:0005637]; receptor complex [GO:0043235]			3	4	71606.9	41080.9	30185.7	42021.4	41895.4	118778	84491.2	36887.1	33729.4	38765.7	74524.9	47995.5	33166.6	33079.6	40857	116870	47992.5	38940.9	32897.7	43474.5	21146.8	36806.6	14739.1	10426	13418.5
Probable cytosolic iron-sulfur protein assembly protein Ciao1 [OS=Homo sapiens]	O76071	O76071	O76071	SUBCELLULAR LOCATION: Cytoplasm {ECO:0000269|PubMed:23585563}.	CIA complex [GO:0097361]; cytoplasm [GO:0005737]; MMXD complex [GO:0071817]		2			Filtered	Filtered	5075.04	Filtered	Filtered	Filtered	Filtered	3935.25	Filtered	Filtered	Filtered	Filtered	3672.96	Filtered	Filtered	Filtered	Filtered	3722.64	Filtered	Filtered	Filtered	Filtered	3324.45	Filtered	Filtered
Signal recognition particle subunit SRP72 [OS=Homo sapiens]	O76094	O76094	O76094	SUBCELLULAR LOCATION: Cytoplasm {ECO:0000269|PubMed:22541560}. Endoplasmic reticulum {ECO:0000269|PubMed:22541560}.	cytosol [GO:0005829]; endoplasmic reticulum [GO:0005783]; signal recognition particle [GO:0048500]; signal recognition particle, endoplasmic reticulum targeting [GO:0005786]		2			8492	2194.12	5097.15	4706.09	4534.16	7076.19	5514.13	6265.49	4618.8	4884.05	4545.66	3749.65	5870.42	4173.41	4289.55	8240.87	4336.61	6407.54	4564.43	5256.63	7522.81	7323.02	3890.77	3430.74	3788.1
N(G),N(G)-dimethylarginine dimethylaminohydrolase 1 [OS=Homo sapiens]	O94760-1	O94760-1	O94760	0	cytosol [GO:0005829]; extracellular exosome [GO:0070062]		2			109454	67547	37204.2	62740.4	73718.1	118119	99802.4	28271.2	64089.7	56735.7	114789	61007.8	39805.6	85884.1	69832.8	82921.3	69050.6	35958.6	54687.6	52325.1	132545	87599.2	34791.9	50507.8	51535.9
retinal dehydrogenase 2 [OS=Homo sapiens];Isoform 2 of Retinal dehydrogenase 2 [OS=Homo sapiens];Isoform 3 of Retinal dehydrogenase 2 [OS=Homo sapiens]	O94788-1;O94788-2;O94788-3	O94788-1;O94788-2;O94788-3	O94788	SUBCELLULAR LOCATION: Cytoplasm.	cytoplasm [GO:0005737]; cytosol [GO:0005829]; perinuclear region of cytoplasm [GO:0048471]		2		4	524679	171649	Filtered	153924	112506	1.03392e+06	8866.79	Filtered	171365	102867	1.02053e+06	131985	Filtered	209406	116361	640280	21728.8	Filtered	233650	139639	388843	59548.1	Filtered	63662.6	58378.4
Tubulin polymerization-promoting protein [OS=Homo sapiens]	O94811	O94811	O94811	SUBCELLULAR LOCATION: Cytoplasm. Cytoplasm, cytoskeleton. Nucleus. Note=Localizes to glial Lewy bodies in the brains of individuals with synucleinopathies.	cytoplasm [GO:0005737]; cytosol [GO:0005829]; microtubule [GO:0005874]; mitochondrion [GO:0005739]; nucleus [GO:0005634]; perinuclear region of cytoplasm [GO:0048471]		2		4	3999.9	Filtered	1530.41	Filtered	Filtered	Filtered	Filtered	1082.49	Filtered	1247.88	736.323	1138.21	747.66	Filtered	Filtered	Filtered	1173.3	1578.99	Filtered	Filtered	Filtered	Filtered	Filtered	Filtered	Filtered
E3 ubiquitin-protein ligase listerin [OS=Homo sapiens];Isoform 2 of E3 ubiquitin-protein ligase listerin [OS=Homo sapiens];Isoform 3 of E3 ubiquitin-protein ligase listerin [OS=Homo sapiens]	O94822;O94822-2;O94822-3	O94822;O94822-2;O94822-3	O94822	0	cytosol [GO:0005829]; RQC complex [GO:1990112]		2			Filtered	Filtered	4783.66	Filtered	1068.74	Filtered	Filtered	4722.83	Filtered	Filtered	Filtered	1921.21	4039.63	Filtered	Filtered	Filtered	Filtered	3926.24	Filtered	Filtered	Filtered	Filtered	2706.99	Filtered	Filtered
Mitochondrial import receptor subunit TOM70 [OS=Homo sapiens]	O94826	O94826	O94826	SUBCELLULAR LOCATION: Mitochondrion outer membrane {ECO:0000250}; Single-pass membrane protein {ECO:0000250}.	extracellular exosome [GO:0070062]; integral component of membrane [GO:0016021]; membrane [GO:0016020]; mitochondrial outer membrane [GO:0005741]; mitochondrial outer membrane translocase complex [GO:0005742]; mitochondrion [GO:0005739]			3		33046.9	29908.3	55965.2	60861.7	51506.2	35651.8	43004.9	49344	55375.1	46662.7	40073.6	33837.3	53235.5	42379.6	51502.7	41695.9	34176.4	57645.7	53523.7	48843.6	49946	47956.9	52938.8	52270.9	39706.4
Unconventional myosin-Id [OS=Homo sapiens]	O94832	O94832	O94832	SUBCELLULAR LOCATION: Cytoplasm {ECO:0000250|UniProtKB:Q63357}. Perikaryon {ECO:0000250|UniProtKB:Q63357}. Cell projection, dendrite {ECO:0000250|UniProtKB:Q63357}. Early endosome {ECO:0000250|UniProtKB:F1PRN2}. Cytoplasm, cell cortex {ECO:0000250|UniProtKB:Q63357}. Note=Colocalizes with the actin cytoskeleton in the cell cortex close to the apical cell membrane. Colocalizes with cytoplasmic punc…	apical dendrite [GO:0097440]; axolemma [GO:0030673]; axon [GO:0030424]; basolateral plasma membrane [GO:0016323]; brush border [GO:0005903]; cell cortex [GO:0005938]; cytoplasmic vesicle [GO:0031410]; cytosol [GO:0005829]; early endosome [GO:0005769]; endosome [GO:0005768]; extracellular exosome [GO:0070062]; myelin sheath [GO:0043209]; myosin complex [GO:0016459]; neuronal cell body [GO:0043025]…		2	3		1720.94	29673.9	10201.8	3733.07	8269.34	5349.92	6631.79	9170.66	7425.09	6126.5	Filtered	4895.43	8495.88	12844.6	7199.27	7417.82	6088.17	10049.7	4090.48	4339.73	8945.23	6102.24	16984	8330.97	7976.95
Protein transport protein Sec24D [OS=Homo sapiens];Isoform 2 of Protein transport protein Sec24D [OS=Homo sapiens]	O94855;O94855-2	O94855;O94855-2	O94855	SUBCELLULAR LOCATION: Cytoplasmic vesicle, COPII-coated vesicle membrane {ECO:0000269|PubMed:10329445}; Peripheral membrane protein {ECO:0000250|UniProtKB:P53992}; Cytoplasmic side {ECO:0000250|UniProtKB:P53992}. Endoplasmic reticulum membrane {ECO:0000305|PubMed:10329445}; Peripheral membrane protein {ECO:0000250|UniProtKB:P53992}; Cytoplasmic side {ECO:0000250|UniProtKB:P53992}. Cytoplasm, cyto…	COPII vesicle coat [GO:0030127]; cytosol [GO:0005829]; endoplasmic reticulum membrane [GO:0005789]; ER to Golgi transport vesicle membrane [GO:0012507]; Golgi membrane [GO:0000139]		2	3		19564.1	82814.1	68450.6	41305.9	40700.4	43534.2	17389.8	31352.4	31512.1	40925.1	23025.8	22006.2	32490.2	21113.1	47916	31868	37694	31709.2	35591.8	42704.9	36181.4	18272.6	28206.6	38390.2	43794.6
E3 UFM1-protein ligase 1 [OS=Homo sapiens]	O94874-1	O94874-1	O94874	SUBCELLULAR LOCATION: Endoplasmic reticulum {ECO:0000269|PubMed:20018847, ECO:0000269|PubMed:20164180, ECO:0000269|PubMed:20228063}. Cytoplasm, cytosol {ECO:0000269|PubMed:20228063}.	cytoplasm [GO:0005737]; cytosol [GO:0005829]; endoplasmic reticulum [GO:0005783]; endoplasmic reticulum membrane [GO:0005789]; membrane [GO:0016020]; neuron projection [GO:0043005]; protein-containing complex [GO:0032991]		2	3		25872.9	11676.1	21119.1	32369.2	40864.7	55040.9	19634.5	21522.4	30841.2	35822.9	34541.6	16652.3	19359.8	24751.6	43674.3	45894.8	12419.1	21179.2	32482.7	34591.3	50373.2	17005.5	19460.4	31420.5	32442
Sorbin and SH3 domain-containing protein 2 [OS=Homo sapiens];Isoform 11 of Sorbin and SH3 domain-containing protein 2 [OS=Homo sapiens];Isoform 9 of Sorbin and SH3 domain-containing protein 2 [OS=Homo sapiens]	O94875-1;O94875-11;O94875-9	O94875-1;O94875-11;O94875-9	O94875	SUBCELLULAR LOCATION: Cytoplasm, perinuclear region {ECO:0000269|PubMed:16125169, ECO:0000269|PubMed:9211900}. Apical cell membrane {ECO:0000269|PubMed:18559503}. Cell junction, focal adhesion {ECO:0000269|PubMed:18559503}. Cell projection, lamellipodium {ECO:0000269|PubMed:18559503}. Note=Found at the Z-disk sarcomeres, stress fibers, dense bodies and focal adhesion. In pancreatic acinar cells, …	actin cytoskeleton [GO:0015629]; apical plasma membrane [GO:0016324]; focal adhesion [GO:0005925]; lamellipodium [GO:0030027]; nucleoplasm [GO:0005654]; nucleus [GO:0005634]; perinuclear region of cytoplasm [GO:0048471]; plasma membrane [GO:0005886]; Z disc [GO:0030018]		2	3	4	Filtered	Filtered	26812.9	3278.63	8483.68	12772.4	14857.8	34090.4	Filtered	6831.66	Filtered	25495	33187.5	Filtered	7918.18	Filtered	10819.1	34793.8	Filtered	6933.4	Filtered	10439.6	20436.7	2924.7	7434.55
Isoform 10 of Sorbin and SH3 domain-containing protein 2 [OS=Homo sapiens];Isoform 12 of Sorbin and SH3 domain-containing protein 2 [OS=Homo sapiens];Isoform 3 of Sorbin and SH3 domain-containing protein 2 [OS=Homo sapiens];Isoform 4 of Sorbin and SH3 domain-containing protein 2 [OS=Homo sapiens]	O94875-10;O94875-12;O94875-3;O94875-4	O94875-10;O94875-12;O94875-3;O94875-4	O94875	SUBCELLULAR LOCATION: Cytoplasm, perinuclear region {ECO:0000269|PubMed:16125169, ECO:0000269|PubMed:9211900}. Apical cell membrane {ECO:0000269|PubMed:18559503}. Cell junction, focal adhesion {ECO:0000269|PubMed:18559503}. Cell projection, lamellipodium {ECO:0000269|PubMed:18559503}. Note=Found at the Z-disk sarcomeres, stress fibers, dense bodies and focal adhesion. In pancreatic acinar cells, …	actin cytoskeleton [GO:0015629]; apical plasma membrane [GO:0016324]; focal adhesion [GO:0005925]; lamellipodium [GO:0030027]; nucleoplasm [GO:0005654]; nucleus [GO:0005634]; perinuclear region of cytoplasm [GO:0048471]; plasma membrane [GO:0005886]; Z disc [GO:0030018]		2	3	4	3091.97	9782.69	41318.6	24463.4	51615.2	31428.6	14218.6	38676.4	12484.5	42869.6	15170.3	20914.3	39567.5	6688.78	48049.6	29195.8	8932.64	41555	20145.9	35439.6	27587	23255.9	36924.9	26042.6	51596.9
Pyridoxal phosphate homeostasis protein [OS=Homo sapiens]	O94903	O94903	O94903	0	cytoplasm [GO:0005737]; intracellular [GO:0005622]		2			19835.4	25740.3	29502.6	38400.2	42305.8	46277.3	32557.1	36122.4	28868.2	36442.4	26079.3	33678	35018.2	28723.7	39174.3	35402.4	18944.1	35618.9	31620.4	36008.1	31772.5	28299.2	29820.2	28210.3	31132.2
Erlin-2 [OS=Homo sapiens]	O94905-1	O94905-1	O94905	SUBCELLULAR LOCATION: Endoplasmic reticulum membrane {ECO:0000269|PubMed:16835267, ECO:0000269|PubMed:17502376, ECO:0000269|PubMed:19240031}; Single-pass type II membrane protein {ECO:0000269|PubMed:16835267, ECO:0000269|PubMed:17502376, ECO:0000269|PubMed:19240031}. Note=Associated with lipid raft-like domains of the endoplasmic reticulum membrane.	cytosol [GO:0005829]; endoplasmic reticulum [GO:0005783]; endoplasmic reticulum membrane [GO:0005789]; integral component of membrane [GO:0016021]; membrane raft [GO:0045121]; plasma membrane [GO:0005886]; protein-containing complex [GO:0032991]		2	3		48974.7	40673.1	82102.1	76459	75924.5	79564.2	75216.7	82114.5	59933	73746.4	59394	50222.8	82395.3	53662.6	76240	65804.2	57063.9	89811.3	63240.2	75873	119487	80754.1	119658	94966.7	97245
ATP-binding cassette sub-family A member 8 [OS=Homo sapiens];Isoform 3 of ATP-binding cassette sub-family A member 8 [OS=Homo sapiens]	O94911-1;O94911-3	O94911-1;O94911-3	O94911	SUBCELLULAR LOCATION: Cell membrane {ECO:0000305}; Multi-pass membrane protein {ECO:0000305}.	integral component of membrane [GO:0016021]; intracellular membrane-bounded organelle [GO:0043231]; plasma membrane [GO:0005886]			3		1792.65	Filtered	3193.94	Filtered	Filtered	Filtered	Filtered	2515.7	Filtered	Filtered	Filtered	Filtered	2268.02	Filtered	Filtered	Filtered	Filtered	3231.28	Filtered	777.329	Filtered	Filtered	4470.32	Filtered	Filtered
Isoform 2 of Actin-binding LIM protein 3 [OS=Homo sapiens];Isoform 3 of Actin-binding LIM protein 3 [OS=Homo sapiens]	O94929-2;O94929-3	O94929-2;O94929-3	O94929	SUBCELLULAR LOCATION: Cytoplasm {ECO:0000250}.	actin cytoskeleton [GO:0015629]; cytoplasm [GO:0005737]; glutamatergic synapse [GO:0098978]; lamellipodium [GO:0030027]; stress fiber [GO:0001725]		2			10060.1	10806	22447.7	15478.9	22637.2	21205.7	9366.8	23554.5	10565.6	17349.2	1.98558	12493	22307.3	11500.9	24763.8	9057.84	8311.46	19955.5	12214.9	17209.5	13643.4	15449.1	20133.9	13530.3	20477.4
Solute carrier organic anion transporter family member 2B1 [OS=Homo sapiens];Isoform 3 of Solute carrier organic anion transporter family member 2B1 [OS=Homo sapiens]	O94956-1;O94956-3	O94956-1;O94956-3	O94956	SUBCELLULAR LOCATION: Cell membrane; Multi-pass membrane protein.	integral component of plasma membrane [GO:0005887]; plasma membrane [GO:0005886]			3		18534.6	14290.3	12351.5	10772.2	14084.8	57252	17268	12595.9	10630.6	12232.6	14935.7	16826.3	13962.5	11982.5	13672.7	26186.2	13149.3	16261.9	7321.9	10419.9	Filtered	Filtered	4779.54	5502.58	Filtered
AP-2 complex subunit alpha-2 [OS=Homo sapiens];Isoform 2 of AP-2 complex subunit alpha-2 [OS=Homo sapiens]	O94973;O94973-2	O94973;O94973-2	O94973	SUBCELLULAR LOCATION: Cell membrane {ECO:0000250|UniProtKB:P17427}; Peripheral membrane protein {ECO:0000250|UniProtKB:P17427}; Cytoplasmic side {ECO:0000250|UniProtKB:P17427}. Membrane, coated pit {ECO:0000250|UniProtKB:P17427}; Peripheral membrane protein {ECO:0000250|UniProtKB:P17427}; Cytoplasmic side {ECO:0000250|UniProtKB:P17427}. Note=AP-2 appears to be excluded from internalizing CCVs and…	AP-2 adaptor complex [GO:0030122]; clathrin-coated endocytic vesicle [GO:0045334]; clathrin-coated endocytic vesicle membrane [GO:0030669]; cytoplasmic vesicle [GO:0031410]; cytosol [GO:0005829]; endocytic vesicle membrane [GO:0030666]; endolysosome membrane [GO:0036020]; ficolin-1-rich granule membrane [GO:0101003]; plasma membrane [GO:0005886]; secretory granule membrane [GO:0030667]		2	3		30664.4	23958.5	40825.1	62255.5	68468.9	67949.6	36915.6	42499.8	54397.4	61082	46687.9	33810.3	42704.2	46574.6	66510.1	51342.9	35706.1	41028.9	56640.1	61283.4	56079.4	38498.5	37952.2	54180.2	49093
Protein transport protein Sec31A [OS=Homo sapiens];Isoform 10 of Protein transport protein Sec31A [OS=Homo sapiens];Isoform 2 of Protein transport protein Sec31A [OS=Homo sapiens];Isoform 3 of Protein transport protein Sec31A [OS=Homo sapiens];Isoform 4 of Protein transport protein Sec31A [OS=Homo sapiens];Isoform 6 of Protein transport protein Sec31A [OS=Homo sapiens];Isoform 8 of Protein transp…	O94979;O94979-10;O94979-2;O94979-3;O94979-4;O94979-6;O94979-8;O94979-9	O94979;O94979-10;O94979-2;O94979-3;O94979-4;O94979-6;O94979-8;O94979-9	O94979	SUBCELLULAR LOCATION: Cytoplasm {ECO:0000250}. Cytoplasmic vesicle, COPII-coated vesicle membrane {ECO:0000269|PubMed:10788476, ECO:0000269|PubMed:16957052, ECO:0000269|PubMed:22358839, ECO:0000269|PubMed:27716508}; Peripheral membrane protein; Cytoplasmic side. Endoplasmic reticulum membrane {ECO:0000250}; Peripheral membrane protein {ECO:0000250}. Cytoplasm, cytosol {ECO:0000269|PubMed:17428803…	COPII-coated ER to Golgi transport vesicle [GO:0030134]; COPII vesicle coat [GO:0030127]; cytoplasm [GO:0005737]; cytosol [GO:0005829]; endoplasmic reticulum [GO:0005783]; endoplasmic reticulum exit site [GO:0070971]; endoplasmic reticulum membrane [GO:0005789]; ER to Golgi transport vesicle membrane [GO:0012507]; Golgi membrane [GO:0000139]; intracellular membrane-bounded organelle [GO:0043231];…		2	3	4	37387.6	30156.1	56623.4	78199.1	93295	107668	53213	58943.7	62035.6	79369.5	64910.2	48253.8	58953.6	51690.6	99520.3	81992.2	35210	57546.8	61828.4	72212.6	112818	62121.7	55637.6	80375.9	75042.1
Indolethylamine N-methyltransferase [OS=Homo sapiens];Isoform 2 of Indolethylamine N-methyltransferase [OS=Homo sapiens]	O95050-1;O95050-2	O95050-1;O95050-2	O95050	SUBCELLULAR LOCATION: Cytoplasm {ECO:0000250}.	cytosol [GO:0005829]		2			Filtered	Filtered	Filtered	Filtered	Filtered	Filtered	Filtered	Filtered	Filtered	Filtered	Filtered	Filtered	Filtered	Filtered	Filtered	Filtered	Filtered	Filtered	Filtered	Filtered	26830.4	59430.9	20890.5	18788.8	12178.2
protein YIF1A [OS=Homo sapiens]	O95070	O95070	O95070	SUBCELLULAR LOCATION: Endoplasmic reticulum membrane {ECO:0000269|PubMed:15308636}; Multi-pass membrane protein {ECO:0000255}. Golgi apparatus membrane {ECO:0000269|PubMed:15308636, ECO:0000269|PubMed:15990086}; Multi-pass membrane protein {ECO:0000255}. Note=Cycles between the endoplasmic reticulum and the endoplasmic reticulum-Golgi intermediate compartment. {ECO:0000269|PubMed:15308636}.	COPII-coated ER to Golgi transport vesicle [GO:0030134]; endoplasmic reticulum-Golgi intermediate compartment [GO:0005793]; endoplasmic reticulum membrane [GO:0005789]; integral component of Golgi membrane [GO:0030173]			3		2204.48	14599.8	21504.7	8628.76	13067.9	Filtered	17503.8	21133.2	14232.1	12130.9	8680.83	14457.3	42058.2	6442.91	11254.2	Filtered	14796.3	38483.9	10298.8	10702.5	11258.9	11443.9	35256.4	13241.8	16529.3
NADH dehydrogenase [ubiquinone] 1 beta subcomplex subunit 6 [OS=Homo sapiens]	O95139	O95139	O95139	SUBCELLULAR LOCATION: Mitochondrion inner membrane {ECO:0000305|PubMed:12611891}; Single-pass membrane protein {ECO:0000255}; Matrix side {ECO:0000305}.	integral component of membrane [GO:0016021]; mitochondrial inner membrane [GO:0005743]; mitochondrial membrane [GO:0031966]; mitochondrial respiratory chain complex I [GO:0005747]; mitochondrion [GO:0005739]; nucleoplasm [GO:0005654]			3	4	Filtered	29869	30935.5	15848.6	Filtered	Filtered	56087.9	24935.4	5855.69	20613.1	Filtered	23417.3	20102.2	26512.4	Filtered	Filtered	20350.8	18056.5	31445.8	Filtered	Filtered	Filtered	22041.1	Filtered	10607
Mitofusin-2 [OS=Homo sapiens]	O95140	O95140	O95140	SUBCELLULAR LOCATION: Mitochondrion outer membrane {ECO:0000269|PubMed:11181170, ECO:0000269|PubMed:11950885, ECO:0000269|PubMed:12499352, ECO:0000269|PubMed:23620051}; Multi-pass membrane protein {ECO:0000269|PubMed:11181170, ECO:0000269|PubMed:11950885, ECO:0000269|PubMed:12499352, ECO:0000269|PubMed:23620051}. Note=Colocalizes with BAX during apoptosis. {ECO:0000269|PubMed:12499352}.	cytosol [GO:0005829]; integral component of membrane [GO:0016021]; intrinsic component of mitochondrial outer membrane [GO:0031306]; microtubule cytoskeleton [GO:0015630]; mitochondrial outer membrane [GO:0005741]; mitochondrion [GO:0005739]		2	3		8755.99	Filtered	9169.31	10088.5	10472.9	17421.5	7717.77	7924.17	8063.61	8940.68	Filtered	5068.32	8361.13	5028.24	10849.9	19532.5	5260.07	8761.16	8515.83	8918.28	23127.3	Filtered	7541.18	9915.5	8934.73
Aflatoxin B1 aldehyde reductase member 3 [OS=Homo sapiens]	O95154	O95154	O95154	SUBCELLULAR LOCATION: Cytoplasm.	cytosol [GO:0005829]; extracellular exosome [GO:0070062]		2			306372	137572	80249	168059	187039	387988	148516	94432.7	178152	198123	437388	145167	101880	233086	183701	315237	146526	105706	176442	171966	383447	135007	77191.6	158499	184616
Gamma-aminobutyric acid receptor-associated protein [OS=Homo sapiens];Gamma-aminobutyric acid receptor-associated protein-like 1 [OS=Homo sapiens];Isoform 2 of Gamma-aminobutyric acid receptor-associated protein-like 1 [OS=Homo sapiens]	O95166;Q9H0R8-1;Q9H0R8-2	O95166;Q9H0R8-1;Q9H0R8-2	O95166	SUBCELLULAR LOCATION: Endomembrane system {ECO:0000250}. Cytoplasm, cytoskeleton {ECO:0000250|UniProtKB:P60517}. Golgi apparatus membrane {ECO:0000250}. Cytoplasmic vesicle, autophagosome {ECO:0000269|PubMed:12507496, ECO:0000269|PubMed:15169837, ECO:0000269|PubMed:17580304, ECO:0000269|PubMed:19056683}. Cytoplasmic vesicle {ECO:0000250|UniProtKB:P60517}. Note=Largely associated with intracellula…	actin cytoskeleton [GO:0015629]; autophagosome [GO:0005776]; autophagosome membrane [GO:0000421]; axoneme [GO:0005930]; cell body [GO:0044297]; cytoplasmic vesicle [GO:0031410]; cytosol [GO:0005829]; Golgi membrane [GO:0000139]; lysosome [GO:0005764]; microtubule [GO:0005874]; microtubule associated complex [GO:0005875]; perinuclear region of cytoplasm [GO:0048471]; plasma membrane [GO:0005886]; …		2	3	4	Filtered	25156.5	13015.7	5625.06	5547.39	Filtered	40521.5	13731.6	5275.34	6229.84	Filtered	21249.8	12384.1	10709.4	6374.07	Filtered	13414.3	12343	4447.71	4539.89	Filtered	38051.3	14007.8	6071.51	4652.5
NADH dehydrogenase [ubiquinone] 1 alpha subcomplex subunit 3 [OS=Homo sapiens]	O95167	O95167	O95167	SUBCELLULAR LOCATION: Mitochondrion inner membrane {ECO:0000305|PubMed:12611891}; Single-pass membrane protein {ECO:0000255}.	integral component of membrane [GO:0016021]; mitochondrial inner membrane [GO:0005743]; mitochondrial respiratory chain complex I [GO:0005747]; mitochondrion [GO:0005739]			3		Filtered	25081.2	11915.9	11913.3	Filtered	Filtered	Filtered	15821.1	7917.65	4778.52	Filtered	31456.3	14280.9	11197.1	Filtered	Filtered	27851.6	13797.1	Filtered	Filtered	Filtered	48914.4	9993.98	Filtered	Filtered
NADH dehydrogenase [ubiquinone] 1 beta subcomplex subunit 4 [OS=Homo sapiens];Isoform 2 of NADH dehydrogenase [ubiquinone] 1 beta subcomplex subunit 4 [OS=Homo sapiens]	O95168-1;O95168-2	O95168-1;O95168-2	O95168	SUBCELLULAR LOCATION: Mitochondrion inner membrane {ECO:0000305|PubMed:12611891}; Single-pass membrane protein {ECO:0000255}; Matrix side {ECO:0000305}.	integral component of membrane [GO:0016021]; mitochondrial inner membrane [GO:0005743]; mitochondrial respiratory chain complex I [GO:0005747]; mitochondrion [GO:0005739]; nuclear membrane [GO:0031965]			3	4	197559	106879	81504	91139.5	84716	226283	148051	76675.4	86332	86137.9	106881	135118	77167.2	97564.3	89246.6	84949.6	124487	68667.2	90961.1	82956.8	214703	147614	57529.7	71431.8	70515
NADH dehydrogenase [ubiquinone] 1 beta subcomplex subunit 8, mitochondrial [OS=Homo sapiens];Isoform 3 of NADH dehydrogenase [ubiquinone] 1 beta subcomplex subunit 8, mitochondrial [OS=Homo sapiens]	O95169;O95169-3	O95169;O95169-3	O95169	SUBCELLULAR LOCATION: Mitochondrion inner membrane {ECO:0000305|PubMed:12611891}; Single-pass membrane protein {ECO:0000255}; Matrix side {ECO:0000305}.	endoplasmic reticulum [GO:0005783]; integral component of membrane [GO:0016021]; mitochondrial inner membrane [GO:0005743]; mitochondrial matrix [GO:0005759]; mitochondrial respiratory chain complex I [GO:0005747]; mitochondrion [GO:0005739]			3		17571.2	18533.3	11012.3	23919.2	18682.4	46456.2	30445.8	12178	24521.5	17820.3	6602.89	20086.3	12172.4	25595.5	19937.6	21734.8	23378.8	13301.4	23704.1	17655	19215.1	30116.5	12789.8	23025.6	15453.1
NADH dehydrogenase [ubiquinone] 1 beta subcomplex subunit 2, mitochondrial [OS=Homo sapiens]	O95178	O95178	O95178	SUBCELLULAR LOCATION: Mitochondrion inner membrane {ECO:0000305|PubMed:12611891}; Peripheral membrane protein {ECO:0000305}; Matrix side {ECO:0000305}.	mitochondrial inner membrane [GO:0005743]; mitochondrial respiratory chain complex I [GO:0005747]			3		20954.5	Filtered	Filtered	Filtered	Filtered	22345.4	Filtered	Filtered	Filtered	Filtered	25067.9	Filtered	Filtered	Filtered	Filtered	12518.1	Filtered	Filtered	Filtered	Filtered	11979.5	Filtered	Filtered	Filtered	Filtered
NADH dehydrogenase [ubiquinone] 1 alpha subcomplex subunit 7 [OS=Homo sapiens]	O95182	O95182	O95182	SUBCELLULAR LOCATION: Mitochondrion inner membrane {ECO:0000305|PubMed:12611891}; Peripheral membrane protein {ECO:0000305}; Matrix side {ECO:0000305}.	mitochondrial inner membrane [GO:0005743]; mitochondrial respiratory chain complex I [GO:0005747]; mitochondrial ribosome [GO:0005761]; mitochondrion [GO:0005739]			3		7995.01	32202.6	42217.9	7641.66	8247.68	11861.9	66239.4	36093.9	7132.54	7608.19	13301.8	51795.4	36293.4	12035.9	6244.16	7585.6	38999.2	32445	5806.53	7478.31	10697.4	43279.3	18412.8	3978.74	2821.68
Isoform 3 of Reticulon-3 [OS=Homo sapiens]	O95197-3	O95197-3	O95197	SUBCELLULAR LOCATION: Endoplasmic reticulum membrane {ECO:0000269|PubMed:12811824, ECO:0000269|PubMed:15286784, ECO:0000269|PubMed:16054885, ECO:0000269|PubMed:16979658, ECO:0000269|PubMed:17031492, ECO:0000269|PubMed:17182608, ECO:0000269|PubMed:17191123, ECO:0000269|PubMed:24262037, ECO:0000269|PubMed:29117567}; Multi-pass membrane protein {ECO:0000255}. Golgi apparatus membrane {ECO:0000269|Pu…	endoplasmic reticulum [GO:0005783]; endoplasmic reticulum membrane [GO:0005789]; extracellular space [GO:0005615]; Golgi membrane [GO:0000139]; integral component of membrane [GO:0016021]; plasma membrane [GO:0005886]; synapse [GO:0045202]	1		3		29421.8	14297.2	18671.3	7069.92	6281.81	20890.7	21197.8	19041	5641.52	9617.6	6742.31	11902.4	19007.8	3145.14	6166.62	7731.65	26220.8	18383	6919.57	10237	24318.1	23325.1	24305	4840.85	13503.6
mitochondrial proton/calcium exchanger protein [OS=Homo sapiens]	O95202-1	O95202-1	O95202	SUBCELLULAR LOCATION: Mitochondrion inner membrane {ECO:0000269|PubMed:14706454, ECO:0000269|PubMed:15138253, ECO:0000269|PubMed:18628306, ECO:0000269|PubMed:19797662}; Single-pass membrane protein {ECO:0000269|PubMed:14706454, ECO:0000269|PubMed:15138253, ECO:0000269|PubMed:18628306}.	integral component of membrane [GO:0016021]; mitochondrial inner membrane [GO:0005743]; mitochondrion [GO:0005739]			3		17497.5	12853.4	14913.4	15069.2	12837.7	14689.5	19139.9	13455.3	13558.4	12495.2	18583.1	13610.2	16229.1	14368.7	12355.4	10670.3	14141.3	15280.1	13909.9	13171.7	9312.31	11571.7	10917.9	12263.4	10276.5
Starch-binding domain-containing protein 1 [OS=Homo sapiens]	O95210	O95210	O95210	SUBCELLULAR LOCATION: Preautophagosomal structure membrane {ECO:0000269|PubMed:20810658, ECO:0000305|PubMed:21893048}; Single-pass type III membrane protein {ECO:0000305|PubMed:9794794}. Endoplasmic reticulum membrane {ECO:0000269|PubMed:24837458}; Single-pass type III membrane protein {ECO:0000305|PubMed:9794794}. Cell membrane, sarcolemma, T-tubule {ECO:0000269|PubMed:9794794}. Note=Also detect…	cytosol [GO:0005829]; endoplasmic reticulum [GO:0005783]; endoplasmic reticulum membrane [GO:0005789]; ficolin-1-rich granule membrane [GO:0101003]; integral component of plasma membrane [GO:0005887]; membrane [GO:0016020]; perinuclear region of cytoplasm [GO:0048471]; phagophore assembly site membrane [GO:0034045]; plasma membrane [GO:0005886]; tertiary granule membrane [GO:0070821]; T-tubule [G…		2	3	4	48794.6	19938.4	55353.4	53203.2	55515.4	126471	39296.8	58628.7	36314.2	55841.9	73486.8	44011.6	47551.2	36827.6	47911.1	93025.7	36360.6	50285.7	42901	49886.3	80127.4	43749.7	33399.5	34860.7	42510.7
sorting nexin-4 [OS=Homo sapiens];Isoform 2 of Sorting nexin-4 [OS=Homo sapiens]	O95219;O95219-2	O95219;O95219-2	O95219	SUBCELLULAR LOCATION: Early endosome {ECO:0000269|PubMed:12668730}. Early endosome membrane {ECO:0000269|PubMed:17994011}; Peripheral membrane protein {ECO:0000269|PubMed:17994011}; Cytoplasmic side {ECO:0000269|PubMed:17994011}. Note=Also detected on a juxtanuclear endocytic recycling compartment (ERC).	cytoplasm [GO:0005737]; cytoplasmic dynein complex [GO:0005868]; early endosome membrane [GO:0031901]; membrane [GO:0016020]; plasma membrane [GO:0005886]; protein-containing complex [GO:0032991]; SNARE complex [GO:0031201]		2	3		5256.89	2301.11	6159.86	5876.49	7490.69	13938.3	7109.9	6337.37	3777.93	5559.85	6190.47	4217.91	6273.15	3413.09	6586.89	8610.21	3502.57	6267.81	4399.59	5438.43	14189	5204.37	6120.7	5960.58	7164.12
Luc7-like protein 3 [OS=Homo sapiens]	O95232-1	O95232-1	O95232	SUBCELLULAR LOCATION: Nucleus speckle {ECO:0000269|PubMed:10631324, ECO:0000269|PubMed:12565863}. Note=The subnuclear localization is affected by cisplatin.	nuclear speck [GO:0016607]; nucleoplasm [GO:0005654]; nucleus [GO:0005634]; U1 snRNP [GO:0005685]; U2-type prespliceosome [GO:0071004]				4	Filtered	Filtered	6136.01	6682.63	9370	Filtered	Filtered	5658.64	4254.27	9160.27	Filtered	2765.1	4959.99	Filtered	9724.98	Filtered	Filtered	4844.19	3999.75	5539.97	Filtered	Filtered	6649.99	10510.5	8146.2
Apolipoprotein L3 [OS=Homo sapiens];Isoform 2 of Apolipoprotein L3 [OS=Homo sapiens]	O95236-1;O95236-2	O95236-1;O95236-2	O95236	SUBCELLULAR LOCATION: Cytoplasm {ECO:0000305}.	cytoplasm [GO:0005737]; extracellular region [GO:0005576]; membrane [GO:0016020]		2	3		4837.88	17316	15722	5123.01	4126.48	Filtered	21351	17602.8	3581.63	3429.38	3830.97	20901.9	18794.8	3892.05	4560.93	Filtered	10400.7	15622.2	2776.91	3150.39	Filtered	Filtered	4678.96	1322.27	1046.54
Golgi SNAP receptor complex member 1 [OS=Homo sapiens];Isoform 2 of Golgi SNAP receptor complex member 1 [OS=Homo sapiens]	O95249-1;O95249-2	O95249-1;O95249-2	O95249	SUBCELLULAR LOCATION: Golgi apparatus membrane {ECO:0000269|PubMed:15215310, ECO:0000269|PubMed:15728195, ECO:0000269|PubMed:17274796, ECO:0000269|PubMed:17337506, ECO:0000269|PubMed:21669198}; Single-pass type IV membrane protein {ECO:0000269|PubMed:15215310, ECO:0000269|PubMed:15728195, ECO:0000269|PubMed:17274796, ECO:0000269|PubMed:17337506, ECO:0000269|PubMed:21669198}. Note=Localizes throug…	cis-Golgi network [GO:0005801]; cytosol [GO:0005829]; Golgi apparatus [GO:0005794]; Golgi medial cisterna [GO:0005797]; Golgi membrane [GO:0000139]; integral component of membrane [GO:0016021]; membrane [GO:0016020]; SNARE complex [GO:0031201]; transport vesicle [GO:0030133]		2	3		Filtered	2418.33	2724.41	3216.42	2842.51	3244.2	Filtered	2347.69	2705.71	2917.09	4008.77	2214.63	2222.77	2173.1	3071.17	3365.2	2351.96	2396.57	3027.62	2497.99	4074.09	2911.78	1707.69	2974.82	2203.19
multidrug resistance-associated protein 6 [OS=Homo sapiens]	O95255-1	O95255-1	O95255	SUBCELLULAR LOCATION: Isoform 1: Basolateral cell membrane {ECO:0000269|PubMed:12901863, ECO:0000269|PubMed:23625951}; Multi-pass membrane protein {ECO:0000255}.; SUBCELLULAR LOCATION: Isoform 2: Endoplasmic reticulum membrane {ECO:0000269|PubMed:23912081}; Single-pass membrane protein {ECO:0000255}.	apical plasma membrane [GO:0016324]; basolateral plasma membrane [GO:0016323]; endoplasmic reticulum membrane [GO:0005789]; integral component of membrane [GO:0016021]; lateral plasma membrane [GO:0016328]; membrane [GO:0016020]; nucleus [GO:0005634]; plasma membrane [GO:0005886]; vacuolar membrane [GO:0005774]			3	4	24443.3	12919.3	37648.6	25121.4	34508.8	26312.3	22640.8	32001	15870.6	30098.1	21125.4	20017.2	31174	12797.5	30968.9	28485.6	12311	32830	19512.1	32977	24288.5	15606	17846.9	13036.7	16436.1
Vesicle-associated membrane protein-associated protein B/C [OS=Homo sapiens]	O95292	O95292	O95292	SUBCELLULAR LOCATION: Endoplasmic reticulum membrane {ECO:0000250}; Single-pass type IV membrane protein {ECO:0000250}. Note=Present in mitochondria-associated membranes that are endoplasmic reticulum membrane regions closely apposed to the outer mitochondrial membrane. {ECO:0000269|PubMed:22131369}.	cytoplasm [GO:0005737]; endoplasmic reticulum [GO:0005783]; endoplasmic reticulum membrane [GO:0005789]; Golgi apparatus [GO:0005794]; Golgi membrane [GO:0000139]; integral component of membrane [GO:0016021]		2	3		31346.7	53673.8	48756	26518.8	25398.8	26014.3	92778.6	55748.6	24612.7	25268.9	33899.6	57297.9	52237.5	22554.1	23689.4	31667.3	52246.7	46601.7	12728.3	23832.3	34113.6	81523.7	47546.2	18628.7	23265.5
SNARE-associated protein Snapin [OS=Homo sapiens]	O95295	O95295	O95295	SUBCELLULAR LOCATION: Membrane {ECO:0000250|UniProtKB:Q9Z266}; Peripheral membrane protein {ECO:0000250|UniProtKB:Q9Z266}; Cytoplasmic side {ECO:0000250|UniProtKB:Q9Z266}. Cytoplasm, cytosol {ECO:0000250|UniProtKB:Q9Z266}. Cytoplasm, perinuclear region {ECO:0000269|PubMed:18167355, ECO:0000269|PubMed:19168546, ECO:0000269|PubMed:21102408}. Golgi apparatus membrane {ECO:0000250|UniProtKB:Q9Z266}. …	axon cytoplasm [GO:1904115]; BLOC-1 complex [GO:0031083]; BORC complex [GO:0099078]; cell junction [GO:0030054]; Golgi membrane [GO:0000139]; lysosomal membrane [GO:0005765]; perinuclear region of cytoplasm [GO:0048471]; secretory granule [GO:0030141]; synapse [GO:0045202]; synaptic vesicle [GO:0008021]; synaptic vesicle membrane [GO:0030672]		2	3	4	17733.3	12263.5	1415.74	1964.49	6311.53	21265.4	18530.7	3102.75	6408.25	6417.83	37472.5	8063.32	3370.01	8645.07	6001.78	Filtered	1258.33	1063.69	6038.54	5659.23	38404.8	11038.5	4522.01	6496.15	7161.28
NADH dehydrogenase [ubiquinone] 1 subunit C2 [OS=Homo sapiens]	O95298-1	O95298-1	O95298	SUBCELLULAR LOCATION: Mitochondrion inner membrane {ECO:0000305|PubMed:12611891}; Single-pass membrane protein {ECO:0000255}; Matrix side {ECO:0000305}.	azurophil granule membrane [GO:0035577]; cytoplasm [GO:0005737]; integral component of membrane [GO:0016021]; mitochondrial inner membrane [GO:0005743]; mitochondrial respiratory chain complex I [GO:0005747]; mitochondrion [GO:0005739]; plasma membrane [GO:0005886]		2	3		14461.1	7251.02	7280.93	5451.34	5915.33	Filtered	13743.8	6162.79	5338.71	4835.88	37315.5	8957.95	6094.84	6620.83	4777.26	18187.6	6595.75	8492.81	4764.21	4498.34	43767.3	12796.1	3600.31	3900.64	2517.83
NADH dehydrogenase [ubiquinone] 1 alpha subcomplex subunit 10, mitochondrial [OS=Homo sapiens]	O95299	O95299	O95299	SUBCELLULAR LOCATION: Mitochondrion matrix {ECO:0000305|PubMed:12611891}.	cytoplasm [GO:0005737]; mitochondrial inner membrane [GO:0005743]; mitochondrial matrix [GO:0005759]; mitochondrial respiratory chain complex I [GO:0005747]; mitochondrion [GO:0005739]		2	3		29621.3	20153.2	26828.8	28582.7	28595.7	31153.8	27419	21504.8	24464.3	26704.1	31531.9	28180.8	23363.6	29140.5	27652.2	34407.8	21851.7	22488	25761.8	26569.6	26203.4	9821.65	18664.9	16070.2	13735
6-phosphogluconolactonase [OS=Homo sapiens]	O95336	O95336	O95336	SUBCELLULAR LOCATION: Cytoplasm {ECO:0000250}.	cytosol [GO:0005829]; extracellular exosome [GO:0070062]		2			146667	79042.1	40405.2	86737.8	87276.8	257986	97842.9	40938.7	75138.8	77797.3	194809	73307.8	46558.4	97273.6	75395.8	169271	70969.9	44191	69313.8	71435.7	445669	161353	66807.4	108991	78867.7
Isoform B of Bifunctional 3'-phosphoadenosine 5'-phosphosulfate synthase 2 [OS=Homo sapiens]	O95340-2	O95340-2	O95340	0	cytosol [GO:0005829]		2			26421.4	14726.3	33946.7	34301	39931.9	64509.5	32432.1	40144.8	28118.1	37650.2	46944.7	29870	42163.8	27216.8	44683.8	47556.2	20051.3	41960.1	29371.8	33160.4	45327.2	27663.2	25799.8	27602.3	36766.8
Bile salt export pump [OS=Homo sapiens]	O95342	O95342	O95342	SUBCELLULAR LOCATION: Membrane; Multi-pass membrane protein.	apical part of cell [GO:0045177]; extracellular exosome [GO:0070062]; integral component of membrane [GO:0016021]; integral component of plasma membrane [GO:0005887]; intercellular canaliculus [GO:0046581]; membrane [GO:0016020]; plasma membrane [GO:0005886]			3		6605.07	7905.29	11166.4	8412.87	9381.23	8914.43	11226.3	10760.9	5711.62	8360.47	7156.94	7998.52	9284.01	5889.67	10177.8	12437.8	7398.64	10483.9	6329.5	7921.97	1707.84	12256.3	8263.98	5536.18	7629.28
Ubiquitin-like modifier-activating enzyme ATG7 [OS=Homo sapiens];Isoform 2 of Ubiquitin-like modifier-activating enzyme ATG7 [OS=Homo sapiens];Isoform 3 of Ubiquitin-like modifier-activating enzyme ATG7 [OS=Homo sapiens]	O95352;O95352-2;O95352-3	O95352;O95352-2;O95352-3	O95352	SUBCELLULAR LOCATION: Cytoplasm {ECO:0000250}. Preautophagosomal structure {ECO:0000250}. Note=Localizes also to discrete punctae along the ciliary axoneme and to the base of the ciliary axoneme. {ECO:0000250}.	axon [GO:0030424]; axoneme [GO:0005930]; cytoplasm [GO:0005737]; cytosol [GO:0005829]; extracellular region [GO:0005576]; ficolin-1-rich granule lumen [GO:1904813]; phagophore assembly site [GO:0000407]; secretory granule lumen [GO:0034774]		2			2670.78	4360.32	3441.5	2073.31	1556.72	Filtered	6080.92	2488.72	Filtered	2522.61	Filtered	2454.12	2385.1	1126.28	2140.47	Filtered	2955.57	3906.83	900.592	1709.77	Filtered	Filtered	4091.5	Filtered	Filtered
phenylalanine--tRNA ligase, mitochondrial [OS=Homo sapiens]	O95363	O95363	O95363	SUBCELLULAR LOCATION: Mitochondrion matrix {ECO:0000250|UniProtKB:Q6AYQ3}. Mitochondrion {ECO:0000250|UniProtKB:Q6AYQ3}.	cytoplasm [GO:0005737]; mitochondrial matrix [GO:0005759]; mitochondrion [GO:0005739]		2			Filtered	Filtered	5979.17	Filtered	Filtered	Filtered	Filtered	5906.31	Filtered	Filtered	Filtered	Filtered	5250.25	Filtered	3695.23	6669.63	Filtered	3916.07	Filtered	Filtered	Filtered	Filtered	5631.54	Filtered	4862.96
acyl-protein thioesterase 2 [OS=Homo sapiens]	O95372	O95372	O95372	SUBCELLULAR LOCATION: Cytoplasm {ECO:0000305}.	cytoplasm [GO:0005737]; cytosol [GO:0005829]; extracellular exosome [GO:0070062]; Golgi stack [GO:0005795]		2			13018.1	14833.2	18559.6	14185.2	13748.1	35631.5	10162.4	8578.76	16225.2	13853.8	40644.6	11414.5	10333.4	14243.2	14024	36576	14989.7	11323.1	13902	15470.8	45953.4	21192.5	19224.1	21252.5	15537
Importin-7 [OS=Homo sapiens]	O95373	O95373	O95373	SUBCELLULAR LOCATION: Cytoplasm. Nucleus.	cytosol [GO:0005829]; membrane [GO:0016020]; nuclear envelope [GO:0005635]; nuclear pore [GO:0005643]; nucleoplasm [GO:0005654]		2	3	4	10128.2	21437.7	14308.9	17629.3	22371.2	11258	10293.1	14694.8	12415.9	19771	13467.5	11552.8	13961	11606.9	18540.2	23501.1	9905.71	14414.4	16409.8	17972	17825.4	19185	13853.8	15927.9	14564.9
Tumor necrosis factor alpha-induced protein 8 [OS=Homo sapiens];Isoform 2 of Tumor necrosis factor alpha-induced protein 8 [OS=Homo sapiens];Isoform 3 of Tumor necrosis factor alpha-induced protein 8 [OS=Homo sapiens];Isoform 4 of Tumor necrosis factor alpha-induced protein 8 [OS=Homo sapiens]	O95379;O95379-2;O95379-3;O95379-4	O95379;O95379-2;O95379-3;O95379-4	O95379	SUBCELLULAR LOCATION: Cytoplasm {ECO:0000269|PubMed:14724590}.	cytoplasm [GO:0005737]; nucleoplasm [GO:0005654]		2		4	6412.88	6911.55	2202.9	2356.16	2491.08	Filtered	7608.54	1786.01	1760.85	2556.85	3704.66	2224.53	1494.52	3471.19	1949.98	5871.97	2586.09	1869.77	2226.34	1720.67	Filtered	Filtered	1951.77	1610.62	Filtered
phosphoacetylglucosamine mutase [OS=Homo sapiens]	O95394	O95394	O95394	0	cytosol [GO:0005829]		2			67479.5	28739.4	19941.2	36652.3	43664.5	90160.5	46904.3	17719.9	31349.6	33825.2	91075.1	35465.6	17752.3	37683.5	36847.2	62875.2	32296	20279.8	31120.3	29182.2	110281	61272.5	20801.4	36317.3	35712.9
Adenylyltransferase and sulfurtransferase MOCS3 [OS=Homo sapiens]	O95396	O95396	O95396	SUBCELLULAR LOCATION: Cytoplasm {ECO:0000255|HAMAP-Rule:MF_03049, ECO:0000269|PubMed:15073332}.	cytoplasm [GO:0005737]; cytosol [GO:0005829]		2			Filtered	Filtered	5690.34	Filtered	4582.64	8888.7	Filtered	6237.25	6645.15	8431.31	Filtered	Filtered	7017.22	Filtered	8069.97	Filtered	Filtered	Filtered	6116.56	9839.49	Filtered	14298.7	Filtered	7115.44	8953.49
activator of 90 kDa heat shock protein ATPase homolog 1 [OS=Homo sapiens];Isoform 2 of Activator of 90 kDa heat shock protein ATPase homolog 1 [OS=Homo sapiens]	O95433;O95433-2	O95433;O95433-2	O95433	SUBCELLULAR LOCATION: Cytoplasm, cytosol {ECO:0000269|PubMed:11554768}. Endoplasmic reticulum {ECO:0000269|PubMed:11554768}. Note=May transiently interact with the endoplasmic reticulum.	cytosol [GO:0005829]; endoplasmic reticulum [GO:0005783]; extracellular exosome [GO:0070062]		2			23928.6	12992.8	21429.8	18471.1	20890.3	6838.96	32537.2	19329.7	12769.4	18353.6	Filtered	22024.2	17785.6	15601.9	18283.8	26830.9	11335.3	18173.9	16354.9	18582	28118.4	27743.7	17889.5	15623.1	18775.7
Proteasome assembly chaperone 1 [OS=Homo sapiens];Isoform 2 of Proteasome assembly chaperone 1 [OS=Homo sapiens]	O95456;O95456-2	O95456;O95456-2	O95456	SUBCELLULAR LOCATION: Cytoplasm. Endoplasmic reticulum.	cytoplasm [GO:0005737]; cytosol [GO:0005829]; endoplasmic reticulum [GO:0005783]; Golgi apparatus [GO:0005794]; nucleoplasm [GO:0005654]; nucleus [GO:0005634]		2		4	4573.46	5557.88	4931.41	2139.6	2512.88	Filtered	11056.3	3189.57	1360.3	2296.63	Filtered	6548.79	3493.83	2619.08	1433.71	Filtered	5605.9	2649.6	1318.13	1920.75	Filtered	6991.42	4225.71	1537.68	2210.08
sphingosine-1-phosphate lyase 1 [OS=Homo sapiens]	O95470	O95470	O95470	SUBCELLULAR LOCATION: Endoplasmic reticulum membrane {ECO:0000269|PubMed:14570870}; Single-pass type III membrane protein {ECO:0000255}; Cytoplasmic side {ECO:0000250|UniProtKB:Q8R0X7}.	endoplasmic reticulum [GO:0005783]; endoplasmic reticulum membrane [GO:0005789]; integral component of endoplasmic reticulum membrane [GO:0030176]			3		12519	23029.7	6662.16	6831.7	7449.65	Filtered	11267.1	7631.13	6351.08	7358.53	10117.2	7157.72	6847.39	6015.56	6622.15	9157.21	9226.46	7397.36	6661.32	6360.69	Filtered	7102.84	7112.08	4879.12	3968.31
GDH/6PGL endoplasmic bifunctional protein [OS=Homo sapiens]	O95479	O95479	O95479	SUBCELLULAR LOCATION: Endoplasmic reticulum lumen. Note=Microsomes, endoplasmic reticulum lumen.	endoplasmic reticulum lumen [GO:0005788]					123369	91913.4	163722	211748	197739	195451	164351	152853	178946	201934	142209	126579	144702	162720	211550	174774	137795	142710	197177	224344	182318	219730	126762	193131	197563
Protein transport protein Sec24A [OS=Homo sapiens]	O95486-1	O95486-1	O95486	SUBCELLULAR LOCATION: Cytoplasmic vesicle, COPII-coated vesicle membrane {ECO:0000305|PubMed:17499046}; Peripheral membrane protein {ECO:0000305|PubMed:17499046}; Cytoplasmic side {ECO:0000305|PubMed:17499046}. Endoplasmic reticulum membrane {ECO:0000305|PubMed:17499046}; Peripheral membrane protein {ECO:0000305|PubMed:17499046}; Cytoplasmic side {ECO:0000305|PubMed:17499046}. Cytoplasm, cytosol …	COPII vesicle coat [GO:0030127]; cytosol [GO:0005829]; endoplasmic reticulum membrane [GO:0005789]; ER to Golgi transport vesicle membrane [GO:0012507]; Golgi membrane [GO:0000139]		2	3		15725.1	9892.29	27386.2	12236.2	14656	11849.1	11977.9	24439.4	8325.13	15226.8	7535.08	13285.7	24553.7	5343.75	13621	16111.8	9462.1	24291.7	10830.8	14440.6	16807.9	7237.12	23194.7	11473.2	14104
Protein transport protein Sec24B [OS=Homo sapiens];Isoform 2 of Protein transport protein Sec24B [OS=Homo sapiens];Isoform 3 of Protein transport protein Sec24B [OS=Homo sapiens]	O95487-1;O95487-2;O95487-3	O95487-1;O95487-2;O95487-3	O95487	SUBCELLULAR LOCATION: Cytoplasmic vesicle, COPII-coated vesicle membrane {ECO:0000269|PubMed:10075675}; Peripheral membrane protein {ECO:0000305|PubMed:10075675}; Cytoplasmic side {ECO:0000305|PubMed:10075675}. Endoplasmic reticulum membrane {ECO:0000269|PubMed:10075675}; Peripheral membrane protein {ECO:0000269|PubMed:10075675}; Cytoplasmic side {ECO:0000269|PubMed:10075675}. Cytoplasm, cytosol …	COPII vesicle coat [GO:0030127]; cytosol [GO:0005829]; endoplasmic reticulum membrane [GO:0005789]; ER to Golgi transport vesicle membrane [GO:0012507]; Golgi membrane [GO:0000139]		2	3		10129.6	7770.46	13722.6	10301.9	14339.7	15093.6	8967.57	14669.6	9061.63	12801	14470.7	7561.35	13004.8	5811.75	15643.6	12433.1	5340.68	13471.3	8848.02	12998.1	17327.6	7207.66	10993.4	11538.6	12549
Pantetheinase [OS=Homo sapiens]	O95497	O95497	O95497	SUBCELLULAR LOCATION: Cell membrane {ECO:0000305|PubMed:11491533}; Lipid-anchor, GPI-anchor {ECO:0000305}.	anchored component of membrane [GO:0031225]; azurophil granule membrane [GO:0035577]; extracellular region [GO:0005576]; integral component of membrane [GO:0016021]; plasma membrane [GO:0005886]			3		53585.7	43226.1	27386.8	44983.5	34525.3	66050.2	53797.8	23166.8	43591.1	33913.2	49047	43139.8	27278.6	66159.4	36584.6	34915.9	34786.5	22719.7	38414.4	32053.9	105610	92820.6	21408.9	51220.1	35227
Mitochondrial pyruvate carrier 2 [OS=Homo sapiens]	O95563	O95563	O95563	SUBCELLULAR LOCATION: Mitochondrion inner membrane {ECO:0000269|PubMed:22628558}; Multi-pass membrane protein {ECO:0000269|PubMed:22628558}.	integral component of mitochondrial inner membrane [GO:0031305]; mitochondrion [GO:0005739]; nucleus [GO:0005634]			3	4	97857.7	79792.1	113732	39246.8	45529.5	101927	115880	115199	39069.7	44892.4	73910.2	71666.8	122021	45468.7	39349.7	57063.2	76545.3	110729	35628.7	40777.5	136969	131461	93205.2	49308	63484.5
Persulfide dioxygenase ETHE1, mitochondrial [OS=Homo sapiens]	O95571	O95571	O95571	SUBCELLULAR LOCATION: Cytoplasm {ECO:0000269|PubMed:12398897}. Nucleus {ECO:0000269|PubMed:12398897}. Mitochondrion matrix {ECO:0000269|PubMed:14732903}.	cytoplasm [GO:0005737]; mitochondrial matrix [GO:0005759]; mitochondrion [GO:0005739]; nucleoplasm [GO:0005654]		2		4	79331.8	72365.7	37250	69964.2	53579	86674.6	68287.2	35129.1	70136.1	49850.3	122874	66419.9	37218.8	91492.7	56112.3	49580.6	70859.8	38408.8	68705	53215.7	100098	121039	48932.2	78586.6	53257.9
long-chain-fatty-acid--CoA ligase 3 [OS=Homo sapiens]	O95573	O95573	O95573	SUBCELLULAR LOCATION: Mitochondrion outer membrane {ECO:0000250}; Single-pass type III membrane protein {ECO:0000250}. Peroxisome membrane {ECO:0000250}; Single-pass type III membrane protein {ECO:0000250}. Microsome membrane {ECO:0000250}; Single-pass type III membrane protein {ECO:0000250}. Endoplasmic reticulum membrane {ECO:0000250}; Single-pass type III membrane protein {ECO:0000250}.	endoplasmic reticulum [GO:0005783]; endoplasmic reticulum membrane [GO:0005789]; Golgi apparatus [GO:0005794]; integral component of membrane [GO:0016021]; lipid droplet [GO:0005811]; membrane [GO:0016020]; mitochondrial outer membrane [GO:0005741]; perinuclear region of cytoplasm [GO:0048471]; peroxisomal membrane [GO:0005778]		2	3	4	10290.7	5037.67	13365.4	10042.5	10852.6	24996.9	7139.24	12935.1	9089.27	9928.52	12182	7214.29	12184.1	6407.69	11361.1	11524.8	5463.62	12551.2	10234.3	9838.74	21583.6	123742	16839.8	11917.1	13429.2
CCR4-NOT transcription complex subunit 4 [OS=Homo sapiens];Isoform 10 of CCR4-NOT transcription complex subunit 4 [OS=Homo sapiens];Isoform 2 of CCR4-NOT transcription complex subunit 4 [OS=Homo sapiens];Isoform 3 of CCR4-NOT transcription complex subunit 4 [OS=Homo sapiens];Isoform 4 of CCR4-NOT transcription complex subunit 4 [OS=Homo sapiens];Isoform 6 of CCR4-NOT transcription complex subunit…	O95628-1;O95628-10;O95628-2;O95628-3;O95628-4;O95628-6;O95628-7;O95628-8;O95628-9	O95628-1;O95628-10;O95628-2;O95628-3;O95628-4;O95628-6;O95628-7;O95628-8;O95628-9	O95628	SUBCELLULAR LOCATION: Cytoplasm {ECO:0000305}. Nucleus {ECO:0000305}.	CCR4-NOT complex [GO:0030014]; cytosol [GO:0005829]; nucleus [GO:0005634]		2		4	156861	156686	Filtered	114036	105506	145080	241773	Filtered	108859	101415	149484	140660	Filtered	147650	94077.5	123581	191717	Filtered	102074	95589.7	65783.8	57246.6	Filtered	34900.9	41038
Cleavage and polyadenylation specificity factor subunit 4 [OS=Homo sapiens];Isoform 2 of Cleavage and polyadenylation specificity factor subunit 4 [OS=Homo sapiens];Isoform 3 of Cleavage and polyadenylation specificity factor subunit 4 [OS=Homo sapiens]	O95639;O95639-2;O95639-3	O95639;O95639-2;O95639-3	O95639	SUBCELLULAR LOCATION: Nucleus.	intracellular membrane-bounded organelle [GO:0043231]; mRNA cleavage and polyadenylation specificity factor complex [GO:0005847]; nucleoplasm [GO:0005654]			3	4	Filtered	Filtered	8604.34	Filtered	Filtered	Filtered	Filtered	6459.67	Filtered	2455.81	Filtered	Filtered	6212.82	Filtered	Filtered	Filtered	Filtered	6814.59	Filtered	Filtered	Filtered	Filtered	6481.78	Filtered	Filtered
N-acetylserotonin O-methyltransferase-like protein [OS=Homo sapiens];Isoform 2 of N-acetylserotonin O-methyltransferase-like protein [OS=Homo sapiens]	O95671-1;O95671-2	O95671-1;O95671-2	O95671	0	cytosol [GO:0005829]		2			11889.5	1634.75	11000.1	22455.9	22372.5	36832.9	16423.7	10767.8	15971.8	18735.7	23406.7	16486	12797.6	17342.6	20950.2	24151.7	10258.9	10980.9	17399.1	17852.8	16215.2	35239.6	4463.7	13024.4	11720.6
phosphatidate cytidylyltransferase 2 [OS=Homo sapiens]	O95674-1	O95674-1	O95674	SUBCELLULAR LOCATION: Mitochondrion inner membrane {ECO:0000305}; Multi-pass membrane protein {ECO:0000305}; Matrix side {ECO:0000305}.	endoplasmic reticulum membrane [GO:0005789]; integral component of membrane [GO:0016021]; membrane [GO:0016020]; mitochondrial inner membrane [GO:0005743]			3		10321.3	9627.49	13746.9	7782.71	10367.2	Filtered	16096.5	12691	6982.53	7317.64	Filtered	9862.16	11711.4	7625.2	10858.1	Filtered	11446.8	11412.8	5515.23	8574.86	Filtered	16626.8	16616.2	9094.34	12800
Isoform 1 of Steroid hormone receptor ERR2 [OS=Homo sapiens];Isoform 2 of Steroid hormone receptor ERR2 [OS=Homo sapiens];Steroid hormone receptor ERR2 [OS=Homo sapiens]	O95718-1;O95718-2;O95718-3	O95718-1;O95718-2;O95718-3	O95718	SUBCELLULAR LOCATION: Nucleus {ECO:0000269|PubMed:18775884}. Cytoplasm {ECO:0000250|UniProtKB:Q61539}. Chromosome {ECO:0000250|UniProtKB:Q61539}.	condensed chromosome [GO:0000793]; cytoplasm [GO:0005737]; nucleoplasm [GO:0005654]; nucleus [GO:0005634]		2		4	10246.6	500073	201567	23803.5	24654.5	6500.33	570662	148958	14528.3	20646.1	9753.37	201112	161863	16407	21606.3	16998.3	218107	148503	16027.8	24506.2	Filtered	231737	151144	6787.8	5805.06
Synaptosomal-associated protein 29 [OS=Homo sapiens]	O95721	O95721	O95721	SUBCELLULAR LOCATION: Cytoplasm {ECO:0000269|PubMed:23217709}. Golgi apparatus membrane {ECO:0000250|UniProtKB:Q9Z2P6}; Peripheral membrane protein {ECO:0000305}. Cytoplasmic vesicle, autophagosome membrane {ECO:0000269|PubMed:25686604}; Peripheral membrane protein {ECO:0000305}. Cell projection, cilium membrane {ECO:0000269|PubMed:25686250}; Peripheral membrane protein {ECO:0000305}. Note=Appear…	autophagosome [GO:0005776]; autophagosome membrane [GO:0000421]; azurophil granule membrane [GO:0035577]; centrosome [GO:0005813]; ciliary pocket membrane [GO:0020018]; cytoplasm [GO:0005737]; cytosol [GO:0005829]; Golgi membrane [GO:0000139]; nucleoplasm [GO:0005654]; plasma membrane [GO:0005886]; presynapse [GO:0098793]; SNARE complex [GO:0031201]		2	3	4	32724.4	13287.4	17915.6	Filtered	25425.3	53943	16534.9	15103.1	26118.2	7570.97	43499.3	3543.95	14735.4	6926.41	6795.74	64892.3	8569.6	16090.2	18533.5	12861.5	70495.9	3231.19	11066.5	12855.6	Filtered
Serine/threonine-protein kinase OSR1 [OS=Homo sapiens]	O95747	O95747	O95747	SUBCELLULAR LOCATION: Cytoplasm {ECO:0000269|PubMed:22361696}.	cytoplasm [GO:0005737]; cytosol [GO:0005829]; extracellular exosome [GO:0070062]		2			26324.8	7691.69	16399	16341.9	23505.9	62977.9	11854.6	22188.2	10935.1	22671.5	23615.6	11216.9	17664.5	9706.65	20053.2	37016.2	9613.86	16723.5	17238.4	20716.2	52293.1	13850.3	26732.7	22498.1	23393
Heat shock 70 kDa protein 4L [OS=Homo sapiens]	O95757	O95757	O95757	SUBCELLULAR LOCATION: Cytoplasm {ECO:0000250}. Nucleus {ECO:0000250}. Note=May translocate to the nucleus after heat shock. {ECO:0000250}.	cytoplasm [GO:0005737]; cytosol [GO:0005829]; nucleus [GO:0005634]		2		4	Filtered	8794	8836.07	14588.7	19873.6	33195.5	4737.88	7728.05	17454.1	12672	Filtered	6481.28	8367.25	13395	15881.2	Filtered	14712.1	9559.84	7450.84	11646.7	13288.9	12904.9	9516.91	15396.3	12636.5
polypyrimidine tract-binding protein 3 [OS=Homo sapiens];Isoform 1 of Polypyrimidine tract-binding protein 3 [OS=Homo sapiens];Isoform 4 of Polypyrimidine tract-binding protein 3 [OS=Homo sapiens];Isoform 5 of Polypyrimidine tract-binding protein 3 [OS=Homo sapiens];Isoform 6 of Polypyrimidine tract-binding protein 3 [OS=Homo sapiens];Isoform 7 of Polypyrimidine tract-binding protein 3 [OS=Homo s…	O95758;O95758-1;O95758-4;O95758-5;O95758-6;O95758-7	O95758;O95758-1;O95758-4;O95758-5;O95758-6;O95758-7	O95758	0	nucleus [GO:0005634]				4	Filtered	Filtered	Filtered	Filtered	Filtered	Filtered	Filtered	Filtered	Filtered	Filtered	Filtered	Filtered	Filtered	Filtered	Filtered	Filtered	Filtered	1773.85	Filtered	Filtered	Filtered	Filtered	Filtered	Filtered	Filtered
U6 snRNA-associated Sm-like protein LSm8 [OS=Homo sapiens]	O95777	O95777	O95777	SUBCELLULAR LOCATION: Nucleus {ECO:0000269|PubMed:10523320, ECO:0000269|PubMed:26912367, ECO:0000269|PubMed:28781166}.	Lsm2-8 complex [GO:0120115]; nucleoplasm [GO:0005654]; nucleus [GO:0005634]; U2-type precatalytic spliceosome [GO:0071005]; U4/U6 x U5 tri-snRNP complex [GO:0046540]; U6 snRNP [GO:0005688]				4	22934.4	35267.9	17115.2	23220.3	32129.7	41139.5	51311.2	17917.6	19119.3	21380.9	9638.51	34805.4	17441.7	31613.7	20255.4	19652.7	28010.7	14641	31008.5	23909.9	45683.6	45773.6	22883.8	20849.4	25510.2
AP-2 complex subunit alpha-1 [OS=Homo sapiens];Isoform B of AP-2 complex subunit alpha-1 [OS=Homo sapiens]	O95782;O95782-2	O95782;O95782-2	O95782	SUBCELLULAR LOCATION: Cell membrane {ECO:0000269|PubMed:16262731}. Membrane, coated pit {ECO:0000250}; Peripheral membrane protein {ECO:0000250}; Cytoplasmic side {ECO:0000250}. Note=AP-2 appears to be excluded from internalizing CCVs and to disengage from sites of endocytosis seconds before internalization of the nascent CCV. {ECO:0000250}.	AP-2 adaptor complex [GO:0030122]; apical plasma membrane [GO:0016324]; basolateral plasma membrane [GO:0016323]; clathrin-coated endocytic vesicle [GO:0045334]; clathrin-coated endocytic vesicle membrane [GO:0030669]; clathrin coat of trans-Golgi network vesicle [GO:0030130]; cytosol [GO:0005829]; endocytic vesicle membrane [GO:0030666]; endolysosome membrane [GO:0036020]; filopodium tip [GO:003…		2	3		17985.7	19200	31301.8	30399.4	29683.8	23030.1	32964	25650.7	21473.9	29088.8	8263.76	20294.4	25227.5	22829	32723.3	18237.1	17464.3	26835.2	27760.3	31612.1	23910.9	28489.8	36050.4	31459.9	27025.7
double-stranded RNA-binding protein Staufen homolog 1 [OS=Homo sapiens];Isoform Short of Double-stranded RNA-binding protein Staufen homolog 1 [OS=Homo sapiens]	O95793;O95793-2	O95793;O95793-2	O95793	SUBCELLULAR LOCATION: Cytoplasm {ECO:0000269|PubMed:19029303}. Rough endoplasmic reticulum {ECO:0000269|PubMed:19029303}. Note=Localizes exclusively with the rough reticulum endoplasmic (RER).	cell body [GO:0044297]; cytoplasm [GO:0005737]; cytoplasmic ribonucleoprotein granule [GO:0036464]; cytoplasmic stress granule [GO:0010494]; cytosol [GO:0005829]; dendrite [GO:0030425]; endoplasmic reticulum [GO:0005783]; extracellular exosome [GO:0070062]; glutamatergic synapse [GO:0098978]; membrane [GO:0016020]; microtubule associated complex [GO:0005875]; neuronal cell body [GO:0043025]; plas…		2	3		23471.6	14861	20351.7	23203.7	28182.2	47648.9	29196.3	20548.3	20434	29887	11796.2	17996.1	20003.6	17137.9	29638.1	17675.7	17231.3	19624.7	22110.9	23716.4	18890.9	22416.7	16383.8	18079.8	21477.9
caveolae-associated protein 2 [OS=Homo sapiens]	O95810	O95810	O95810	SUBCELLULAR LOCATION: Cytoplasm, cytosol {ECO:0000269|PubMed:10191091, ECO:0000269|PubMed:2390065}. Membrane, caveola {ECO:0000269|PubMed:19262564, ECO:0000269|PubMed:19525939}. Note=Localizes in the caveolae in a caveolin-dependent manner. {ECO:0000269|PubMed:19262564}.	actin cytoskeleton [GO:0015629]; caveola [GO:0005901]; cytoplasm [GO:0005737]; cytosol [GO:0005829]; membrane raft [GO:0045121]; nucleoplasm [GO:0005654]; plasma membrane [GO:0005886]		2	3	4	8974.36	5188.3	12690.5	7985.19	9867.87	11099.1	8991.04	11648.3	6839.66	7765.77	12203.9	5632.64	11524	7908.41	7242.31	11901.3	6292.28	10698.6	8674.21	7801	13612.1	8700	12833.5	7645.42	6401.77
BAG family molecular chaperone regulator 2 [OS=Homo sapiens]	O95816	O95816	O95816	0	axon [GO:0030424]; chaperone complex [GO:0101031]; cytosol [GO:0005829]; dendrite [GO:0030425]; dendritic microtubule [GO:1901588]		2			Filtered	Filtered	7683.61	16677.2	11719.2	9642.74	14387.7	6449.92	7443.93	16971	Filtered	6267.29	5298.02	7398.94	11262.2	11790.7	9587.87	6263.09	19779.6	18772.7	10720.7	10424.3	7449.81	11145.6	12519
Malonyl-CoA decarboxylase, mitochondrial [OS=Homo sapiens];Isoform Cytoplasmic+peroxisomal of Malonyl-CoA decarboxylase, mitochondrial [OS=Homo sapiens]	O95822;O95822-2	O95822;O95822-2	O95822	SUBCELLULAR LOCATION: Cytoplasm {ECO:0000269|PubMed:10417274}. Mitochondrion matrix {ECO:0000269|PubMed:10417274}. Peroxisome {ECO:0000269|PubMed:10417274}. Peroxisome matrix {ECO:0000250}. Note=Enzymatically active in all three subcellular compartments. {ECO:0000250}.	cytoplasm [GO:0005737]; cytosol [GO:0005829]; mitochondrial matrix [GO:0005759]; mitochondrion [GO:0005739]; peroxisomal matrix [GO:0005782]; peroxisome [GO:0005777]		2			22611.1	15829.9	15474.1	12625.6	9662.46	24420.6	24499.8	17310.8	12422.3	10535.7	30945.7	17475.4	18996	17941.8	11939.6	20242.2	20380.4	17164.3	13455.1	9014.95	28315.1	25000.6	18115.5	11700.5	12861
Apoptosis-inducing factor 1, mitochondrial [OS=Homo sapiens]	O95831-1	O95831-1	O95831	SUBCELLULAR LOCATION: Mitochondrion intermembrane space. Mitochondrion inner membrane. Cytoplasm. Nucleus. Cytoplasm, perinuclear region. Note=Proteolytic cleavage during or just after translocation into the mitochondrial intermembrane space (IMS) results in the formation of an inner-membrane-anchored mature form (AIFmit). During apoptosis, further proteolytic processing leads to a mature form, w…	cytosol [GO:0005829]; mitochondrial inner membrane [GO:0005743]; mitochondrial intermembrane space [GO:0005758]; mitochondrion [GO:0005739]; nucleus [GO:0005634]; perinuclear region of cytoplasm [GO:0048471]		2	3	4	259480	266326	255731	303125	292647	224563	440216	266549	281013	264009	246993	292274	300525	298053	308362	206069	280055	318040	312080	269536	286177	347942	203083	279654	247030
claudin-1 [OS=Homo sapiens]	O95832	O95832	O95832	SUBCELLULAR LOCATION: Cell junction, tight junction {ECO:0000269|PubMed:20375010, ECO:0000269|PubMed:23407391}. Cell membrane {ECO:0000269|PubMed:23704991}; Multi-pass membrane protein {ECO:0000255}. Basolateral cell membrane {ECO:0000269|PubMed:20375010}. Note=Associates with CD81 and the CLDN1-CD81 complex localizes to the basolateral cell membrane. {ECO:0000269|PubMed:20375010}.	apical plasma membrane [GO:0016324]; basolateral plasma membrane [GO:0016323]; bicellular tight junction [GO:0005923]; cytoplasm [GO:0005737]; integral component of membrane [GO:0016021]; integral component of plasma membrane [GO:0005887]; lateral plasma membrane [GO:0016328]		2	3		Filtered	18120.9	24554.2	7354.89	7362.7	Filtered	33045.6	24792.9	6288.35	9193.06	Filtered	19556.9	25334.2	5403.63	4870.33	Filtered	15076.7	25980.2	Filtered	3330.49	Filtered	10250.3	18995.1	5814	Filtered
echinoderm microtubule-associated protein-like 2 [OS=Homo sapiens];Isoform 2 of Echinoderm microtubule-associated protein-like 2 [OS=Homo sapiens];Isoform 3 of Echinoderm microtubule-associated protein-like 2 [OS=Homo sapiens]	O95834;O95834-2;O95834-3	O95834;O95834-2;O95834-3	O95834	SUBCELLULAR LOCATION: Cytoplasm, cytoskeleton {ECO:0000269|PubMed:11694528}. Cytoplasm, cytoskeleton, spindle {ECO:0000269|PubMed:11694528}. Note=Colocalizes with the microtubule cytoskeleton. Colocalizes with the mitotic spindle.	cytoplasm [GO:0005737]; microtubule [GO:0005874]; microtubule associated complex [GO:0005875]; microtubule cytoskeleton [GO:0015630]; spindle [GO:0005819]		2			27139.3	14137.4	11174.9	12191.4	17571.7	34543.1	26412.4	12469.4	13067	19400.8	28938	19358	11542.4	18503.7	19738.7	24209.2	33878.2	13949.2	22789.6	25540.7	29867.5	37552.2	20222.8	25162.5	24802.4
3'(2'),5'-bisphosphate nucleotidase 1 [OS=Homo sapiens]	O95861-1	O95861-1	O95861	0	cytosol [GO:0005829]		2			33115.9	14270.2	7626.58	22244.3	16888.7	40898.3	15676.2	11693.2	16147.5	16274.7	36349.6	12846.5	10099.8	22090.7	17199.5	33155	17263.6	9237.84	16576	20640.5	50374.8	14654.6	7703.79	20064.8	16200.9
N(G),N(G)-dimethylarginine dimethylaminohydrolase 2 [OS=Homo sapiens]	O95865	O95865	O95865	SUBCELLULAR LOCATION: Cytoplasm {ECO:0000269|PubMed:21898353}. Mitochondrion {ECO:0000269|PubMed:21898353}. Note=Translocates from cytosol to mitochondrion upon IL-1beta stimulation in chondrocytes.	cytosol [GO:0005829]; extracellular exosome [GO:0070062]; microtubule organizing center [GO:0005815]; mitochondrion [GO:0005739]		2			12666	14972	12927.7	12039.8	12649.5	14863	25860.2	12168	11135.1	12657.3	15673.5	16781.8	11590.8	14388.4	14246.1	10677.7	17733.7	11972.4	10857.3	10202.1	37540.4	36099.4	21262.1	13564.4	11183.2
Protein ABHD16A [OS=Homo sapiens];Isoform 2 of Protein ABHD16A [OS=Homo sapiens]	O95870-1;O95870-2	O95870-1;O95870-2	O95870	SUBCELLULAR LOCATION: Membrane {ECO:0000250|UniProtKB:Q9Z1Q2}; Multi-pass membrane protein {ECO:0000255}.	integral component of membrane [GO:0016021]			3		31366.9	16130.4	21244.6	34333	35097.7	29252.6	22088.7	20727.4	27100	33054.4	40186.9	20303.5	22707.2	31104.6	33891.4	34031.1	20713.2	23755.8	31605.5	32023.8	35281.7	19650.8	18895.4	32708.7	26248.9
Thioredoxin domain-containing protein 12 [OS=Homo sapiens]	O95881	O95881	O95881	SUBCELLULAR LOCATION: Endoplasmic reticulum lumen {ECO:0000269|PubMed:12761212}.	endoplasmic reticulum [GO:0005783]; endoplasmic reticulum lumen [GO:0005788]					46157.9	45046	36275.1	21974.5	23552.3	29195.6	33850.2	25104	24475.4	22006.4	32339.9	22769.3	22893.1	22055.2	20268.6	19839	23808.2	22755.1	22309.4	20849.1	58809.4	43551.3	30513.2	29030.1	25842
formimidoyltransferase-cyclodeaminase [OS=Homo sapiens]	O95954-1	O95954-1	O95954	SUBCELLULAR LOCATION: Cytoplasm, cytoskeleton, microtubule organizing center, centrosome, centriole {ECO:0000269|PubMed:16534631}. Golgi apparatus {ECO:0000250}. Note=More abundantly located around the mother centriole.	centriole [GO:0005814]; cytoplasm [GO:0005737]; cytosol [GO:0005829]; endoplasmic reticulum [GO:0005783]; endoplasmic reticulum-Golgi intermediate compartment [GO:0005793]; extracellular exosome [GO:0070062]; Golgi apparatus [GO:0005794]; Golgi membrane [GO:0000139]; plasma membrane [GO:0005886]; smooth endoplasmic reticulum membrane [GO:0030868]		2	3		254053	179312	144323	216214	182744	239907	276233	135756	165798	168840	324301	193306	160574	242113	185772	230575	172257	161825	194617	176991	202483	124734	149288	142857	104413
Diphosphoinositol polyphosphate phosphohydrolase 1 [OS=Homo sapiens]	O95989	O95989	O95989	SUBCELLULAR LOCATION: Cytoplasm {ECO:0000305}.	cytoplasm [GO:0005737]; cytosol [GO:0005829]; nucleus [GO:0005634]		2		4	22507.6	4532.54	Filtered	15040.8	12427.3	Filtered	Filtered	Filtered	11140.8	Filtered	Filtered	7583.3	Filtered	8313.03	11898.9	Filtered	Filtered	Filtered	14166.6	Filtered	16507.9	24358.2	7739.1	19193.2	19579.2
NADH dehydrogenase [ubiquinone] 1 beta subcomplex subunit 10 [OS=Homo sapiens]	O96000	O96000	O96000	SUBCELLULAR LOCATION: Mitochondrion inner membrane {ECO:0000305|PubMed:12611891}; Peripheral membrane protein {ECO:0000305}; Matrix side {ECO:0000305}.	mitochondrial inner membrane [GO:0005743]; mitochondrial respiratory chain complex I [GO:0005747]			3		45755.8	40186.7	32437.9	60938.9	55960	53671	68034.8	30034.6	58735.7	53650.4	49285.8	53038.7	27861.6	59505.6	57221.2	58304.3	39677.7	32347.2	63698.7	50984.6	77952.9	74658.3	24941.9	49111.1	41608.6
Cleft lip and palate transmembrane protein 1 [OS=Homo sapiens];Isoform 3 of Cleft lip and palate transmembrane protein 1 [OS=Homo sapiens]	O96005-1;O96005-4	O96005-1;O96005-4	O96005	SUBCELLULAR LOCATION: Membrane {ECO:0000305}; Multi-pass membrane protein {ECO:0000305}.	external side of plasma membrane [GO:0009897]; integral component of plasma membrane [GO:0005887]; membrane [GO:0016020]			3		Filtered	7011.73	15803.7	7979.76	10169.5	Filtered	11118.3	13121.7	5080.9	8684.42	Filtered	10385	14288.3	4095.24	7735.21	Filtered	9522.7	12442.9	6866.69	8318.16	Filtered	14355.5	10241.4	5932.64	6518.78
molybdopterin synthase catalytic subunit [OS=Homo sapiens]	O96007	O96007	O96007	SUBCELLULAR LOCATION: Cytoplasm, cytosol {ECO:0000255|HAMAP-Rule:MF_03052, ECO:0000269|PubMed:15073332}.	cytosol [GO:0005829]; molybdopterin synthase complex [GO:0019008]; nuclear speck [GO:0016607]; nucleus [GO:0005634]		2		4	8414.95	8689.2	5349.86	4056.15	4063.2	12096.2	Filtered	3737.73	5505.52	3922.61	8968.16	4835.4	3389.88	3214.33	4752	11098.3	8872.98	4150.94	4052.48	3955.39	Filtered	Filtered	1644.95	2222.79	4899.28
Mitochondrial import receptor subunit TOM40 homolog [OS=Homo sapiens]	O96008	O96008	O96008	SUBCELLULAR LOCATION: Mitochondrion outer membrane {ECO:0000269|PubMed:15644312}; Multi-pass membrane protein {ECO:0000255}.	cytosol [GO:0005829]; integral component of membrane [GO:0016021]; integral component of mitochondrial outer membrane [GO:0031307]; mitochondrial inner membrane [GO:0005743]; mitochondrial outer membrane [GO:0005741]; mitochondrial outer membrane translocase complex [GO:0005742]; mitochondrion [GO:0005739]; pore complex [GO:0046930]		2	3		9476.99	24744.8	20644.4	4939.75	7808.4	9041.75	27373.7	15914.1	8001.39	7758.32	4461.36	14500.9	17640.8	10942	7636.35	Filtered	14187.9	20741.4	7957.42	4054.87	5902.5	17252	18541.3	10046.1	5446.17
Peroxisomal membrane protein 11B [OS=Homo sapiens];Isoform 2 of Peroxisomal membrane protein 11B [OS=Homo sapiens]	O96011-1;O96011-2	O96011-1;O96011-2	O96011	SUBCELLULAR LOCATION: Peroxisome membrane {ECO:0000269|PubMed:10704444, ECO:0000269|PubMed:20826455, ECO:0000269|PubMed:9792670, ECO:0000269|PubMed:9826565}; Single-pass membrane protein {ECO:0000269|PubMed:10704444, ECO:0000269|PubMed:9792670, ECO:0000269|PubMed:9826565}.	integral component of peroxisomal membrane [GO:0005779]; membrane [GO:0016020]; mitochondrion [GO:0005739]; peroxisomal membrane [GO:0005778]; peroxisome [GO:0005777]; protein-containing complex [GO:0032991]			3		6881.2	8102.35	10603.3	8125.39	7670.41	3080.82	13070.8	9466.96	7586.39	6491.77	15714.1	9140.59	10243.3	8539.21	6461.24	Filtered	9250.03	10124.3	7150.81	7324.38	10439.2	15457.4	8700.82	6497.52	6014.22
Actin-like protein 6A [OS=Homo sapiens]	O96019-1	O96019-1	O96019	SUBCELLULAR LOCATION: Nucleus {ECO:0000269|PubMed:18026119}.	Ino80 complex [GO:0031011]; npBAF complex [GO:0071564]; NuA4 histone acetyltransferase complex [GO:0035267]; nuclear chromatin [GO:0000790]; nucleoplasm [GO:0005654]; nucleus [GO:0005634]; plasma membrane [GO:0005886]; protein-containing complex [GO:0032991]; SWI/SNF complex [GO:0016514]			3	4	Filtered	4859.33	10518.9	Filtered	Filtered	Filtered	Filtered	8993.5	8873.91	Filtered	Filtered	Filtered	10522.3	13006.5	10483.2	Filtered	11261.3	5166.07	Filtered	Filtered	Filtered	10162.2	10890	10251.9	Filtered
cytochrome b [OS=Homo sapiens]	P00156	P00156	P00156	SUBCELLULAR LOCATION: Mitochondrion inner membrane {ECO:0000250|UniProtKB:P00157}; Multi-pass membrane protein {ECO:0000250|UniProtKB:P00157}.	integral component of mitochondrial inner membrane [GO:0031305]; mitochondrial inner membrane [GO:0005743]; mitochondrial respiratory chain complex III [GO:0005750]; mitochondrion [GO:0005739]			3		14264	28018.2	9950.54	22183	24250.9	4282.87	66947.3	10163.5	15421.8	17636.9	19192.2	22751.4	13180.4	19306.5	25857.6	24167.8	19723.1	10179.5	19351	18881.6	10674.7	69011.2	27491.7	42649.4	31708.6
Cytochrome b5 [OS=Homo sapiens]	P00167-1	P00167-1	P00167	SUBCELLULAR LOCATION: Isoform 1: Endoplasmic reticulum membrane; Single-pass membrane protein; Cytoplasmic side. Microsome membrane; Single-pass membrane protein; Cytoplasmic side.; SUBCELLULAR LOCATION: Isoform 2: Cytoplasm.	cytosol [GO:0005829]; endoplasmic reticulum membrane [GO:0005789]; integral component of membrane [GO:0016021]; intracellular membrane-bounded organelle [GO:0043231]; membrane [GO:0016020]; mitochondrial outer membrane [GO:0005741]		2	3		604308	843682	568287	540266	500845	558641	1.12628e+06	630129	719331	467640	824463	859016	633642	674652	439214	532513	817430	682814	520405	345178	604109	1.19586e+06	426424	472648	536576
Alcohol dehydrogenase 1B [OS=Homo sapiens]	P00325	P00325	P00325	SUBCELLULAR LOCATION: Cytoplasm.	cytosol [GO:0005829]; nucleoplasm [GO:0005654]; plasma membrane [GO:0005886]		2	3	4	2.03471e+06	1.70429e+06	1.6555e+06	1.46396e+06	1.54503e+06	1.94986e+06	3.0007e+06	1.718e+06	1.32627e+06	1.39014e+06	1.283e+06	1762614	1.8394e+06	1.47741e+06	1.41899e+06	1.30311e+06	1.92193e+06	1.85456e+06	1.22341e+06	1.17257e+06	852890	1.33026e+06	981007	788142	834228
Alcohol dehydrogenase 1C [OS=Homo sapiens]	P00326	P00326	P00326	SUBCELLULAR LOCATION: Cytoplasm.	cytosol [GO:0005829]; nucleoplasm [GO:0005654]; plasma membrane [GO:0005886]		2	3	4	957577	745160	907482	512667	510692	563160	1.84074e+06	831426	474815	441059	719473	867157	914119	550966	452556	676072	853906	985242	443946	407435	184545	372402	373253	187093	248631
L-lactate dehydrogenase A chain [OS=Homo sapiens];Isoform 3 of L-lactate dehydrogenase A chain [OS=Homo sapiens]	P00338-1;P00338-3	P00338-1;P00338-3	P00338	SUBCELLULAR LOCATION: Cytoplasm.	cytosol [GO:0005829]; extracellular exosome [GO:0070062]; membrane [GO:0016020]; nucleus [GO:0005634]		2	3	4	2141403	1.22499e+06	765202	1.84342e+06	1.64814e+06	2.43592e+06	2.06429e+06	630807	1.47883e+06	1.2855e+06	2.70542e+06	1513221	708843	1.87776e+06	1.50346e+06	1.53997e+06	1.17496e+06	792646	1622055	1.46992e+06	2.99857e+06	3932070	1.09026e+06	2.21638e+06	1.71251e+06
Retinal dehydrogenase 1 [OS=Homo sapiens]	P00352	P00352	P00352	SUBCELLULAR LOCATION: Cytoplasm, cytosol {ECO:0000250|UniProtKB:P48644}.	cytoplasm [GO:0005737]; cytosol [GO:0005829]; extracellular exosome [GO:0070062]		2			635226	400826	211999	510999	502799	533847	581504	208956	395761	414273	878406	401444	223025	598676	499277	513295	414114	214737	422857	441848	746000	633138	290537	544380	449831
Glutamate dehydrogenase 1, mitochondrial [OS=Homo sapiens]	P00367	P00367	P00367	SUBCELLULAR LOCATION: Mitochondrion matrix.	cytoplasm [GO:0005737]; mitochondrial matrix [GO:0005759]; mitochondrion [GO:0005739]		2			2.10908e+06	2317201	1.24788e+06	1762987	1.50536e+06	2.35869e+06	2693827	1365105	1.66976e+06	1.46791e+06	3.30925e+06	1.95938e+06	1.51349e+06	2.25844e+06	1.5091e+06	2.57487e+06	2.20099e+06	1.5008e+06	1.70487e+06	1.49648e+06	1.77535e+06	1.69541e+06	670194	874895	855242
dihydrofolate reductase [OS=Homo sapiens]	P00374	P00374	P00374	SUBCELLULAR LOCATION: Mitochondrion {ECO:0000250|UniProtKB:P00375}. Cytoplasm {ECO:0000250|UniProtKB:P00375}.	cytosol [GO:0005829]; mitochondrion [GO:0005739]		2			Filtered	2242.31	7655.27	Filtered	4079.79	Filtered	Filtered	6690.6	1831.8	4583.66	Filtered	5539.28	3436.53	Filtered	4933.14	Filtered	Filtered	6879.72	3216.71	Filtered	Filtered	Filtered	Filtered	Filtered	Filtered
NADH-cytochrome b5 reductase 3 [OS=Homo sapiens];Isoform 2 of NADH-cytochrome b5 reductase 3 [OS=Homo sapiens];Isoform 3 of NADH-cytochrome b5 reductase 3 [OS=Homo sapiens]	P00387;P00387-2;P00387-3	P00387;P00387-2;P00387-3	P00387	SUBCELLULAR LOCATION: Isoform 1: Endoplasmic reticulum membrane; Lipid-anchor; Cytoplasmic side. Mitochondrion outer membrane; Lipid-anchor; Cytoplasmic side.; SUBCELLULAR LOCATION: Isoform 2: Cytoplasm. Note=Produces the soluble form found in erythrocytes.	azurophil granule lumen [GO:0035578]; cytoplasm [GO:0005737]; endoplasmic reticulum [GO:0005783]; endoplasmic reticulum membrane [GO:0005789]; extracellular region [GO:0005576]; hemoglobin complex [GO:0005833]; lipid droplet [GO:0005811]; membrane [GO:0016020]; mitochondrial outer membrane [GO:0005741]; mitochondrion [GO:0005739]		2	3		77057.1	116322	105588	73223.2	75046.7	102703	186956	124457	75159.6	77699.5	73691.5	135719	121070	93636.6	70720.3	66477.5	137073	119511	74412.4	66122.1	146599	230052	143243	88696.7	84597.6
Glutathione reductase, mitochondrial [OS=Homo sapiens];Isoform Cytoplasmic of Glutathione reductase, mitochondrial [OS=Homo sapiens]	P00390;P00390-2	P00390;P00390-2	P00390	SUBCELLULAR LOCATION: Isoform Mitochondrial: Mitochondrion.; SUBCELLULAR LOCATION: Isoform Cytoplasmic: Cytoplasm.	cytosol [GO:0005829]; external side of plasma membrane [GO:0009897]; extracellular exosome [GO:0070062]; mitochondrial matrix [GO:0005759]; mitochondrion [GO:0005739]		2	3		118743	105688	66309.5	91425.3	94264.8	151525	177109	68335	83507	98902.8	176134	118968	68701.9	106943	93356.8	138836	106009	75118.4	92507.9	94499.8	335269	273066	152669	157640	137535
Cytochrome c oxidase subunit 1 [OS=Homo sapiens]	P00395	P00395	P00395	SUBCELLULAR LOCATION: Mitochondrion inner membrane; Multi-pass membrane protein.	integral component of membrane [GO:0016021]; mitochondrial inner membrane [GO:0005743]; mitochondrial respiratory chain complex III [GO:0005750]; mitochondrial respiratory chain complex IV [GO:0005751]; respiratory chain complex IV [GO:0045277]			3		Filtered	15395.1	25030.6	5768.19	4035.46	Filtered	21462.2	37306.4	4719.33	4335.98	Filtered	15187.5	33375.6	4567.36	3092.31	Filtered	9648.05	25300.5	4920.61	5582.89	Filtered	15147.5	20842.9	4788.37	2676.62
Cytochrome c oxidase subunit 2 [OS=Homo sapiens]	P00403	P00403	P00403	SUBCELLULAR LOCATION: Mitochondrion inner membrane; Multi-pass membrane protein.	integral component of membrane [GO:0016021]; membrane [GO:0016020]; mitochondrial inner membrane [GO:0005743]; mitochondrion [GO:0005739]; respiratory chain complex IV [GO:0045277]			3		751338	782073	337417	521202	517646	824975	938154	321259	593820	529280	758468	711733	389758	706740	564852	557139	597642	399941	589998	524932	1.04084e+06	1.00083e+06	364588	606922	510319
Cytochrome c oxidase subunit 3 [OS=Homo sapiens]	P00414	P00414	P00414	SUBCELLULAR LOCATION: Mitochondrion inner membrane {ECO:0000250}; Multi-pass membrane protein {ECO:0000250}.	integral component of membrane [GO:0016021]; mitochondrial inner membrane [GO:0005743]; mitochondrion [GO:0005739]; respiratory chain complex IV [GO:0045277]			3		30660.4	5018.6	4671.7	2887.55	7326.25	240700	24392.5	5205.12	4708.11	3761.54	58832.5	6714.91	6389.13	7523.32	8413	52990.1	15680.3	4351.29	6317.56	7455.83	5723.51	40658.8	7121.12	6137.81	6473.1
phenylalanine-4-hydroxylase [OS=Homo sapiens]	P00439	P00439	P00439	0	cytosol [GO:0005829]		2			88660.1	53670.9	138133	87147.4	104469	155368	86830	129243	66952.8	87618.4	107540	82931.4	121745	60556.1	103939	129161	60895.2	134681	78485.7	99337.4	92810.8	52637.6	52951.4	49790.9	56281.3
Superoxide dismutase [Cu-Zn] [OS=Homo sapiens]	P00441	P00441	P00441	SUBCELLULAR LOCATION: Cytoplasm {ECO:0000269|PubMed:19741096}. Mitochondrion {ECO:0000269|PubMed:19741096}. Nucleus {ECO:0000269|PubMed:22496122}. Note=Predominantly cytoplasmic; the pathogenic variants ALS1 Arg-86 and Ala-94 gradually aggregates and accumulates in mitochondria. {ECO:0000269|PubMed:19741096}.	axon cytoplasm [GO:1904115]; cytoplasm [GO:0005737]; cytoplasmic vesicle [GO:0031410]; cytosol [GO:0005829]; dendrite cytoplasm [GO:0032839]; dense core granule [GO:0031045]; extracellular exosome [GO:0070062]; extracellular region [GO:0005576]; extracellular space [GO:0005615]; lysosome [GO:0005764]; mitochondrial intermembrane space [GO:0005758]; mitochondrial matrix [GO:0005759]; mitochondrion…	1	2	3	4	355176	229746	70645.5	288981	154023	352417	180836	70602.6	258954	104844	334541	195148	80439.4	366312	140329	305268	96743.3	96993.3	178040	130023	458902	256484	104145	194713	127740
Ceruloplasmin [OS=Homo sapiens]	P00450	P00450	P00450	SUBCELLULAR LOCATION: Secreted. Note=Colocalizes with GCP1 in secretory intracellular compartments. {ECO:0000250}.	blood microparticle [GO:0072562]; endoplasmic reticulum lumen [GO:0005788]; extracellular exosome [GO:0070062]; extracellular region [GO:0005576]; extracellular space [GO:0005615]; lysosomal membrane [GO:0005765]; plasma membrane [GO:0005886]	1		3		80198.3	101391	134942	141382	137958	91872.3	144141	117309	112228	123228	97446.9	114446	119739	114841	142371	92520.6	150792	121655	137311	135683	91099.1	123306	96160.5	98219.2	85265.1
Ornithine carbamoyltransferase, mitochondrial [OS=Homo sapiens]	P00480	P00480	P00480	SUBCELLULAR LOCATION: Mitochondrion matrix.	mitochondrial inner membrane [GO:0005743]; mitochondrial matrix [GO:0005759]; mitochondrion [GO:0005739]			3		252468	260152	153696	229225	209210	355432	381264	196660	305592	191390	388642	284205	220013	300983	198552	316080	294554	214072	268946	175596	362872	378420	147039	212905	188744
Coagulation factor XIII A chain [OS=Homo sapiens]	P00488	P00488	P00488	SUBCELLULAR LOCATION: Cytoplasm. Secreted {ECO:0000269|PubMed:4405643}. Note=Secreted into the blood plasma. Cytoplasmic in most tissues, but also secreted in the blood plasma.	blood microparticle [GO:0072562]; collagen-containing extracellular matrix [GO:0062023]; extracellular region [GO:0005576]; platelet alpha granule lumen [GO:0031093]					19975.4	3599.57	10528.4	6756.96	7604.45	Filtered	8372.04	10142.7	9916.18	10575.8	Filtered	2445.46	6100.61	7895.54	8136.45	3092.05	12951.8	7847.47	12222.3	10617.8	23259.9	28837.9	24902.1	17978	15643
purine nucleoside phosphorylase [OS=Homo sapiens]	P00491	P00491	P00491	SUBCELLULAR LOCATION: Cytoplasm, cytoskeleton {ECO:0000250}. Cytoplasm {ECO:0000269|PubMed:22509282}.	cytoplasm [GO:0005737]; cytoskeleton [GO:0005856]; cytosol [GO:0005829]; extracellular exosome [GO:0070062]; extracellular region [GO:0005576]; ficolin-1-rich granule lumen [GO:1904813]; nucleus [GO:0005634]; secretory granule lumen [GO:0034774]		2		4	100089	40292.6	17613	85751.3	77428.4	73951.1	42134.3	14219.1	81367	67533	103032	28675.8	14668.5	132252	77058	81118	34794.5	15821.7	89571.6	67945.3	74991	31697.9	12139.7	56215.4	35001.6
Hypoxanthine-guanine phosphoribosyltransferase [OS=Homo sapiens]	P00492	P00492	P00492	SUBCELLULAR LOCATION: Cytoplasm.	cytoplasm [GO:0005737]; cytosol [GO:0005829]; extracellular exosome [GO:0070062]		2			85622.5	39169.3	23181	39097.8	40351.2	59300	46052.3	19249.9	42758.1	46711.5	79605.3	35783.1	18185.1	65454.3	43031	59818.4	49790	20135.8	43267.8	44724.7	101240	34410	25839.6	45601.5	42799.7
Aspartate aminotransferase, mitochondrial [OS=Homo sapiens]	P00505	P00505	P00505	SUBCELLULAR LOCATION: Mitochondrion matrix {ECO:0000269|PubMed:9537447}. Cell membrane {ECO:0000269|PubMed:9537447}. Note=Exposure to alcohol promotes translocation to the cell membrane.	cell surface [GO:0009986]; extracellular exosome [GO:0070062]; mitochondrial inner membrane [GO:0005743]; mitochondrial matrix [GO:0005759]; mitochondrion [GO:0005739]; perikaryon [GO:0043204]; plasma membrane [GO:0005886]; protein-containing complex [GO:0032991]; T-tubule [GO:0030315]			3		617447	657452	290031	308664	314804	907944	1.08311e+06	331607	343482	331806	567188	678521	336715	529684	331042	707619	662564	398375	341751	340396	648215	539399	168594	159412	166570
epidermal growth factor receptor [OS=Homo sapiens]	P00533-1	P00533-1	P00533	SUBCELLULAR LOCATION: Cell membrane {ECO:0000269|PubMed:17182860, ECO:0000269|PubMed:23589287, ECO:0000269|PubMed:27153536, ECO:0000269|PubMed:2790960}; Single-pass type I membrane protein {ECO:0000269|PubMed:27153536}. Endoplasmic reticulum membrane {ECO:0000269|PubMed:27153536}; Single-pass type I membrane protein. Golgi apparatus membrane; Single-pass type I membrane protein. Nucleus membrane;…	apical plasma membrane [GO:0016324]; basal plasma membrane [GO:0009925]; basolateral plasma membrane [GO:0016323]; cell surface [GO:0009986]; clathrin-coated vesicle membrane [GO:0030665]; cytoplasm [GO:0005737]; early endosome membrane [GO:0031901]; endocytic vesicle [GO:0030139]; endoplasmic reticulum membrane [GO:0005789]; endosome [GO:0005768]; endosome membrane [GO:0010008]; extracellular sp…	1	2	3	4	12425.1	17667.9	18437.9	14936.2	16342	16488.5	16225.3	18751.6	12139.6	18604.2	14012.4	15592.3	16604.4	9092.29	15140.2	12253	15055.7	19048.4	14360.2	17499	14629.8	18585.9	16997.9	13958.7	14226
phosphoglycerate kinase 1 [OS=Homo sapiens]	P00558	P00558	P00558	SUBCELLULAR LOCATION: Cytoplasm.	cytosol [GO:0005829]; extracellular exosome [GO:0070062]; extracellular space [GO:0005615]; membrane [GO:0016020]; membrane raft [GO:0045121]	1	2	3		346326	188962	198133	155948	181329	350053	290727	178978	163920	168562	396232	219288	191484	197602	151766	321881	245634	191315	159002	149270	472462	344651	275546	194757	201047
Adenylate kinase isoenzyme 1 [OS=Homo sapiens]	P00568	P00568	P00568	SUBCELLULAR LOCATION: Cytoplasm.	cytosol [GO:0005829]; extracellular exosome [GO:0070062]		2			48844.7	60016.1	76982.7	91151.2	73403.9	73147.4	83092.2	60294.6	67056.6	93888.1	45488.5	81620.1	76769.3	80428.8	109330	68018.8	77148.8	70415.1	92212	95139.2	54538	107189	54575.4	83302.2	86760.5
Prothrombin [OS=Homo sapiens]	P00734	P00734	P00734	SUBCELLULAR LOCATION: Secreted, extracellular space.	blood microparticle [GO:0072562]; endoplasmic reticulum lumen [GO:0005788]; extracellular exosome [GO:0070062]; extracellular region [GO:0005576]; extracellular space [GO:0005615]; Golgi lumen [GO:0005796]; plasma membrane [GO:0005886]	1		3		16427.7	19862.7	34591.7	36051.5	35736.4	37873	33138.3	30375.7	33464.4	34910.8	23974.5	26106.4	26686.7	25585.2	36153.3	24413.4	26538.8	30977.7	37428.7	35328.3	31931.7	29116	29094	33231.8	31940.4
Complement C1r subcomponent [OS=Homo sapiens]	P00736	P00736	P00736	SUBCELLULAR LOCATION: Secreted {ECO:0000269|PubMed:27745832}.	blood microparticle [GO:0072562]; extracellular exosome [GO:0070062]; extracellular region [GO:0005576]; extracellular space [GO:0005615]	1				21088.5	12888.6	15470.1	16482	17632.6	15551.7	15547.2	13547.2	13360.3	13417.8	21529	13436.4	16478.9	15184.4	16275	47935.1	10168.6	13572.3	17380	17696.2	16940.9	12323.7	11953.3	11325.3	9138.97
Haptoglobin [OS=Homo sapiens]	P00738	P00738	P00738	SUBCELLULAR LOCATION: Secreted.	blood microparticle [GO:0072562]; endocytic vesicle lumen [GO:0071682]; extracellular exosome [GO:0070062]; extracellular region [GO:0005576]; extracellular space [GO:0005615]; haptoglobin-hemoglobin complex [GO:0031838]; specific granule lumen [GO:0035580]; tertiary granule lumen [GO:1904724]	1				216650	264932	426836	323261	311388	235349	563805	429781	274002	283201	285242	405271	424641	370463	342075	245282	352214	434771	306986	294119	138108	221990	182002	166461	154856
Coagulation factor IX [OS=Homo sapiens]	P00740	P00740	P00740	SUBCELLULAR LOCATION: Secreted {ECO:0000269|PubMed:19846852, ECO:0000269|PubMed:2592373, ECO:0000269|PubMed:3857619, ECO:0000269|PubMed:8295821, ECO:0000269|PubMed:9169594}.	collagen-containing extracellular matrix [GO:0062023]; endoplasmic reticulum lumen [GO:0005788]; extracellular exosome [GO:0070062]; extracellular region [GO:0005576]; extracellular space [GO:0005615]; Golgi lumen [GO:0005796]; plasma membrane [GO:0005886]	1		3		36423.5	20707.1	25842.7	35930	36703.3	36250.8	27122.9	28059.8	29614.1	33597.1	29863.1	23200	25114.5	27315.4	40392.1	26499.5	23109.4	21335.2	32200.4	39445.5	32630.6	31064.3	35007.6	37023	37238.6
Complement factor D [OS=Homo sapiens]	P00746	P00746	P00746	SUBCELLULAR LOCATION: Secreted.	extracellular exosome [GO:0070062]; extracellular region [GO:0005576]; ficolin-1-rich granule lumen [GO:1904813]; platelet alpha granule lumen [GO:0031093]; secretory granule lumen [GO:0034774]					6951.03	15325.6	11579.5	1425.48	Filtered	12760.6	18077.2	15769.2	5457.91	6146.53	25056.4	17042	15274.7	6415.53	4044.67	Filtered	22759.8	12519.4	7214.98	1368.52	19845.7	30667.4	29716.5	4774.88	14340.1
Plasminogen [OS=Homo sapiens]	P00747	P00747	P00747	SUBCELLULAR LOCATION: Secreted {ECO:0000269|PubMed:10077593, ECO:0000269|PubMed:14699093}. Note=Locates to the cell surface where it is proteolytically cleaved to produce the active plasmin. Interaction with HRG tethers it to the cell surface.	blood microparticle [GO:0072562]; cell surface [GO:0009986]; collagen-containing extracellular matrix [GO:0062023]; extracellular exosome [GO:0070062]; extracellular region [GO:0005576]; extracellular space [GO:0005615]; extrinsic component of external side of plasma membrane [GO:0031232]; other organism cell membrane [GO:0044218]; plasma membrane [GO:0005886]; platelet alpha granule lumen [GO:00…	1		3		19841.7	16868.6	30899.3	32302.7	30963.6	34668.4	14973.9	24236.9	27262	30339.9	28792.8	19999.8	27990.3	25067.9	32677.2	34889.6	17417.1	26206.4	33447.7	30704.1	26100.6	10964.1	21283.9	27842.7	23253
Coagulation factor XII [OS=Homo sapiens]	P00748	P00748	P00748	SUBCELLULAR LOCATION: Secreted.	collagen-containing extracellular matrix [GO:0062023]; extracellular exosome [GO:0070062]; extracellular region [GO:0005576]; extracellular space [GO:0005615]; plasma membrane [GO:0005886]; rough endoplasmic reticulum [GO:0005791]	1		3		16410	12231.4	14590.2	18375.7	19134.6	26678.8	15182.1	15998.7	15519.1	19389.9	25786.2	12799.1	15256.9	12579.8	18089.2	36778.7	20178.9	13066.5	17222.8	20959.2	15756.2	27204.3	12051.7	13863.9	9947.47
Complement factor B [OS=Homo sapiens]	P00751-1	P00751-1	P00751	SUBCELLULAR LOCATION: Secreted.	blood microparticle [GO:0072562]; extracellular exosome [GO:0070062]; extracellular region [GO:0005576]; extracellular space [GO:0005615]; plasma membrane [GO:0005886]	1		3		16621.8	19704.1	27216.4	30252.3	29750	27867.7	39266.9	19392.9	25854.4	23577.9	22903.9	29923.2	20429.3	21847.6	25797.6	32085.4	17605	24600.9	31470.7	24140.6	24921	34021.3	19080.3	24213.9	18756.7
adenosine deaminase [OS=Homo sapiens]	P00813	P00813	P00813	SUBCELLULAR LOCATION: Cell membrane {ECO:0000269|PubMed:11772392, ECO:0000269|PubMed:8101391}; Peripheral membrane protein; Extracellular side. Cell junction {ECO:0000269|PubMed:11772392}. Cytoplasmic vesicle lumen {ECO:0000250|UniProtKB:P03958}. Cytoplasm {ECO:0000250}. Lysosome {ECO:0000269|PubMed:8452534}. Note=Colocalized with DPP4 at the cell surface. {ECO:0000269|PubMed:11772392}.	cell junction [GO:0030054]; cell surface [GO:0009986]; cytoplasmic vesicle lumen [GO:0060205]; cytosol [GO:0005829]; dendrite cytoplasm [GO:0032839]; external side of plasma membrane [GO:0009897]; extracellular space [GO:0005615]; lysosome [GO:0005764]; membrane [GO:0016020]; neuronal cell body [GO:0043025]; plasma membrane [GO:0005886]	1	2	3		Filtered	Filtered	3225.3	Filtered	Filtered	Filtered	Filtered	2970.32	Filtered	Filtered	Filtered	Filtered	1419.97	Filtered	Filtered	Filtered	Filtered	3724.1	Filtered	Filtered	Filtered	Filtered	3447.38	Filtered	Filtered
ATP synthase subunit A [OS=Homo sapiens]	P00846	P00846	P00846	SUBCELLULAR LOCATION: Mitochondrion inner membrane; Multi-pass membrane protein.	integral component of membrane [GO:0016021]; mitochondrial inner membrane [GO:0005743]; mitochondrial proton-transporting ATP synthase complex [GO:0005753]; proton-transporting ATP synthase complex [GO:0045259]; proton-transporting ATP synthase complex, coupling factor F(o) [GO:0045263]			3		125260	128647	76404.3	51804.2	49269	40857.8	155944	82331.3	42173.3	48541.3	74640.6	113047	89093	75513.3	51969.1	55082.4	122240	95381.4	58597.7	55459.4	73377.1	166794	84451.6	53213.5	47445.8
carbonic anhydrase 1 [OS=Homo sapiens]	P00915	P00915	P00915	SUBCELLULAR LOCATION: Cytoplasm.	cytosol [GO:0005829]; extracellular exosome [GO:0070062]		2			44715	154027	221865	162983	194609	100582	317329	192040	172672	320449	154815	202807	151234	304145	209118	252917	612009	179321	478648	335300	189445	510157	227126	264581	206630
Carbonic anhydrase 2 [OS=Homo sapiens]	P00918	P00918	P00918	SUBCELLULAR LOCATION: Cytoplasm {ECO:0000269|PubMed:15990874}. Cell membrane {ECO:0000269|PubMed:15990874}. Note=Colocalized with SLC26A6 at the surface of the cell membrane in order to form a bicarbonate transport metabolon. Displaced from the cytosolic surface of the cell membrane by PKC in phorbol myristate acetate (PMA)-induced cells.	apical part of cell [GO:0045177]; axon [GO:0030424]; basolateral plasma membrane [GO:0016323]; cytoplasm [GO:0005737]; cytosol [GO:0005829]; extracellular exosome [GO:0070062]; microvillus [GO:0005902]; myelin sheath [GO:0043209]; plasma membrane [GO:0005886]		2	3		172434	226111	161959	172055	180622	180486	371836	145346	176854	173215	155010	232436	147220	237306	181563	193800	272982	154308	213617	170741	331614	372169	185324	178979	158888
Argininosuccinate synthase [OS=Homo sapiens]	P00966	P00966	P00966	SUBCELLULAR LOCATION: Cytoplasm, cytosol {ECO:0000269|PubMed:28985504, ECO:0000305|PubMed:27287393}.	cell body fiber [GO:0070852]; cytoplasm [GO:0005737]; cytosol [GO:0005829]; endoplasmic reticulum [GO:0005783]; extracellular exosome [GO:0070062]; lysosome [GO:0005764]; mitochondrial outer membrane [GO:0005741]; nucleus [GO:0005634]; perikaryon [GO:0043204]		2	3	4	1.04364e+06	978806	672459	1.57181e+06	1678247	1.88794e+06	1693040	691845	1401399	1.61563e+06	2181939	1.36852e+06	732136	1.51746e+06	1.8564e+06	1.34276e+06	1.28037e+06	800702	1.47557e+06	1.7224e+06	957420	1.82021e+06	565232	1.12079e+06	1.08289e+06
Antithrombin-III [OS=Homo sapiens]	P01008	P01008	P01008	SUBCELLULAR LOCATION: Secreted, extracellular space.	blood microparticle [GO:0072562]; collagen-containing extracellular matrix [GO:0062023]; endoplasmic reticulum lumen [GO:0005788]; extracellular exosome [GO:0070062]; extracellular region [GO:0005576]; extracellular space [GO:0005615]; plasma membrane [GO:0005886]	1		3		16144.6	19579.5	18030.2	16751.9	20222.8	12496.5	28533.1	17492.6	16401.2	20682.7	16631.4	16184	20661.4	19894.7	19066.6	20304.1	23857.1	16256.2	19137.9	20130.7	25156.2	20213	21541.7	11983.6	12413.7
alpha-1-antitrypsin [OS=Homo sapiens]	P01009-1	P01009-1	P01009	SUBCELLULAR LOCATION: Secreted. Endoplasmic reticulum. Note=The S and Z allele are not secreted effectively and accumulate intracellularly in the endoplasmic reticulum.; SUBCELLULAR LOCATION: Short peptide from AAT: Secreted, extracellular space, extracellular matrix.	collagen-containing extracellular matrix [GO:0062023]; COPII-coated ER to Golgi transport vesicle [GO:0030134]; endoplasmic reticulum [GO:0005783]; endoplasmic reticulum-Golgi intermediate compartment membrane [GO:0033116]; endoplasmic reticulum lumen [GO:0005788]; extracellular exosome [GO:0070062]; extracellular region [GO:0005576]; extracellular space [GO:0005615]; ficolin-1-rich granule lumen…	1		3		282963	280302	376503	274798	281659	408183	554790	341361	227955	251796	468163	290675	341452	287777	249379	428092	360580	359633	269101	264812	554246	480829	397182	214753	184197
Alpha-1-antichymotrypsin [OS=Homo sapiens]	P01011-1	P01011-1	P01011	SUBCELLULAR LOCATION: Secreted.	azurophil granule lumen [GO:0035578]; blood microparticle [GO:0072562]; collagen-containing extracellular matrix [GO:0062023]; extracellular exosome [GO:0070062]; extracellular region [GO:0005576]; extracellular space [GO:0005615]; nucleus [GO:0005634]; platelet alpha granule lumen [GO:0031093]; secretory granule lumen [GO:0034774]	1			4	823048	745468	426689	674613	707608	831331	1.23562e+06	427493	671224	653802	1.18269e+06	780088	412636	957655	717659	853947	745599	429432	731811	624984	952842	940698	353017	473427	396902
Angiotensinogen [OS=Homo sapiens]	P01019	P01019	P01019	SUBCELLULAR LOCATION: Secreted.	blood microparticle [GO:0072562]; collagen-containing extracellular matrix [GO:0062023]; cytosol [GO:0005829]; extracellular exosome [GO:0070062]; extracellular region [GO:0005576]; extracellular space [GO:0005615]	1	2			81746.8	61781	44841.7	56001.1	55646.9	81803.4	130520	42438.5	53941.7	52794.1	99203.4	72100.4	43036.2	69063.4	57029.6	100546	67193.1	43002.2	53025.7	56692.2	135071	105054	51788.9	52956.1	40204
alpha-2-macroglobulin [OS=Homo sapiens]	P01023	P01023	P01023	SUBCELLULAR LOCATION: Secreted {ECO:0000269|PubMed:6203908}.	blood microparticle [GO:0072562]; collagen-containing extracellular matrix [GO:0062023]; cytosol [GO:0005829]; extracellular exosome [GO:0070062]; extracellular region [GO:0005576]; platelet alpha granule lumen [GO:0031093]		2			197557	100615	76642.7	227095	224075	324968	126210	63431.9	176956	203322	292289	103347	59383.1	222934	222901	303967	136354	68473.5	222283	211615	454489	197230	88132.2	243883	193744
Complement C3 [OS=Homo sapiens]	P01024	P01024	P01024	SUBCELLULAR LOCATION: Secreted.	azurophil granule lumen [GO:0035578]; blood microparticle [GO:0072562]; cell surface [GO:0009986]; endoplasmic reticulum lumen [GO:0005788]; extracellular exosome [GO:0070062]; extracellular region [GO:0005576]; extracellular space [GO:0005615]; plasma membrane [GO:0005886]; protein-containing complex [GO:0032991]; secretory granule lumen [GO:0034774]	1		3		115202	116449	197582	159196	184190	368526	258826	211808	131159	177908	251214	187232	218729	136203	178017	295376	233413	211727	189997	181903	135000	157905	91713.6	79265.8	78059.3
Complement C5 [OS=Homo sapiens]	P01031	P01031	P01031	SUBCELLULAR LOCATION: Secreted.	extracellular exosome [GO:0070062]; extracellular region [GO:0005576]; extracellular space [GO:0005615]; membrane attack complex [GO:0005579]	1		3		16018.5	17176.9	31925.5	19535.7	23873.2	Filtered	20005.1	27666.5	17629.7	28489.1	Filtered	16065.8	25453.9	27466.9	23726.5	37144.1	24582.3	24547	29652.5	28270.6	35369	26081.2	23707	17767.7	20105.6
Metalloproteinase inhibitor 1 [OS=Homo sapiens]	P01033	P01033	P01033	SUBCELLULAR LOCATION: Secreted {ECO:0000269|PubMed:1730286, ECO:0000269|PubMed:24635319, ECO:0000269|PubMed:3010309, ECO:0000269|PubMed:3839290, ECO:0000269|PubMed:3903517, ECO:0000269|PubMed:8541540}.	basement membrane [GO:0005604]; endoplasmic reticulum lumen [GO:0005788]; extracellular exosome [GO:0070062]; extracellular matrix [GO:0031012]; extracellular region [GO:0005576]; extracellular space [GO:0005615]; platelet alpha granule lumen [GO:0031093]	1		3		12649.9	13017.4	15095.3	14496.9	18969.4	10012.7	21766.9	13435.4	17656.4	20005	Filtered	14639.5	12007.1	16303.3	20791.7	16285.6	15396.2	11235.8	12843.7	14482.4	19284.3	21884.1	15187.9	13245.5	12599
Cystatin-C [OS=Homo sapiens]	P01034	P01034	P01034	SUBCELLULAR LOCATION: Secreted {ECO:0000269|PubMed:20189825}.	axon [GO:0030424]; basement membrane [GO:0005604]; contractile fiber [GO:0043292]; endoplasmic reticulum [GO:0005783]; endoplasmic reticulum lumen [GO:0005788]; extracellular exosome [GO:0070062]; extracellular region [GO:0005576]; extracellular space [GO:0005615]; ficolin-1-rich granule lumen [GO:1904813]; Golgi apparatus [GO:0005794]; lysosome [GO:0005764]; multivesicular body [GO:0005771]; neu…	1	2	3	4	5100.91	20116.3	15057.1	Filtered	9428.6	13904.3	25063.4	22885.9	7715.52	7107.55	29007.1	14366.2	25719.2	7091.47	9593.14	12702.4	24909.8	25277.7	13191.4	Filtered	45801.9	25163	30616.7	5945.47	7458.11
Cystatin-A [OS=Homo sapiens]	P01040	P01040	P01040	SUBCELLULAR LOCATION: Cytoplasm {ECO:0000269|PubMed:21944047}.	cornified envelope [GO:0001533]; cytoplasm [GO:0005737]; cytosol [GO:0005829]; extracellular space [GO:0005615]; nucleus [GO:0005634]	1	2		4	Filtered	26765.4	8567.42	Filtered	2595.01	Filtered	45788.3	7770.8	2621.62	2962.27	Filtered	21215	8548.9	7666.61	Filtered	Filtered	11868	8919.38	Filtered	Filtered	Filtered	25013.3	13675.2	Filtered	Filtered
Isoform LMW of Kininogen-1 [OS=Homo sapiens]	P01042-2	P01042-2	P01042	SUBCELLULAR LOCATION: Secreted, extracellular space.	blood microparticle [GO:0072562]; collagen-containing extracellular matrix [GO:0062023]; endoplasmic reticulum lumen [GO:0005788]; extracellular exosome [GO:0070062]; extracellular region [GO:0005576]; extracellular space [GO:0005615]; plasma membrane [GO:0005886]; platelet alpha granule lumen [GO:0031093]	1		3		24614.7	32556.5	31018.5	36361	37619.3	28780.9	35251.1	30335.8	33463.8	33093.7	30102.9	27241.9	29429.1	31268.6	35345	23586.4	35336.8	25372.6	36337.5	33355.3	12273.9	6849.3	13951	14411.1	13990.8
Isoform 2B of GTPase KRas [OS=Homo sapiens]	P01116-2	P01116-2	P01116	SUBCELLULAR LOCATION: Cell membrane {ECO:0000269|PubMed:22431598, ECO:0000269|PubMed:23698361}; Lipid-anchor {ECO:0000305|PubMed:23698361}; Cytoplasmic side {ECO:0000305|PubMed:23698361}. Cytoplasm, cytosol {ECO:0000269|PubMed:23698361}.	cytoplasm [GO:0005737]; cytosol [GO:0005829]; extrinsic component of cytoplasmic side of plasma membrane [GO:0031234]; focal adhesion [GO:0005925]; membrane [GO:0016020]; membrane raft [GO:0045121]; mitochondrion [GO:0005739]; plasma membrane [GO:0005886]		2	3		16863.1	33696.1	11969.3	21261.5	16626.8	60432.6	66086.6	14072.5	15907.9	23090.2	57419.6	17116.1	13955.6	18382	21137.8	44521	35451	13670.8	13894.8	14154.5	58974.2	54683.6	13533.7	11079.1	15638.8
Immunoglobulin J chain [OS=Homo sapiens]	P01591	P01591	P01591	SUBCELLULAR LOCATION: Secreted {ECO:0000250|UniProtKB:P01592}.	blood microparticle [GO:0072562]; dimeric IgA immunoglobulin complex [GO:0071750]; extracellular exosome [GO:0070062]; extracellular region [GO:0005576]; extracellular space [GO:0005615]; monomeric IgA immunoglobulin complex [GO:0071748]; pentameric IgM immunoglobulin complex [GO:0071756]; secretory dimeric IgA immunoglobulin complex [GO:0071752]; secretory IgA immunoglobulin complex [GO:0071751]	1				13364.7	27320.5	19078.4	39204.6	69534.6	50615.2	60443.3	10554.5	40315.5	31387.1	Filtered	23342.7	10569.6	37866.2	34587.1	Filtered	29906.3	21306.2	44747.7	22856.8	52387.3	176789	39727.4	124962	83926.2
Immunoglobulin kappa variable 1-33 [OS=Homo sapiens]	P01594	P01594	P01594	SUBCELLULAR LOCATION: Secreted {ECO:0000303|PubMed:20176268, ECO:0000303|PubMed:22158414}. Cell membrane {ECO:0000303|PubMed:20176268, ECO:0000303|PubMed:22158414}.	blood microparticle [GO:0072562]; extracellular region [GO:0005576]; extracellular space [GO:0005615]; plasma membrane [GO:0005886]	1		3		Filtered	Filtered	Filtered	7573.08	Filtered	Filtered	9982.77	6021.61	7865.18	8891.05	Filtered	Filtered	5377.82	11473	7514.11	Filtered	9404.13	7179.64	8445.65	7564.84	86563.7	80812.2	39352.2	42234.9	30730.1
Immunoglobulin kappa variable 1-17 [OS=Homo sapiens]	P01599	P01599	P01599	SUBCELLULAR LOCATION: Secreted {ECO:0000303|PubMed:20176268, ECO:0000303|PubMed:22158414}. Cell membrane {ECO:0000303|PubMed:20176268, ECO:0000303|PubMed:22158414}.	blood microparticle [GO:0072562]; extracellular exosome [GO:0070062]; extracellular region [GO:0005576]; extracellular space [GO:0005615]; plasma membrane [GO:0005886]	1		3		Filtered	20252.8	13267.9	21018.5	22160.2	Filtered	24348.3	13550.7	Filtered	18766.7	Filtered	22707.8	16945.5	23151.6	17898.5	Filtered	30828.4	10429	22177.9	20712.9	50823	56011.1	32070.8	32214.9	29550.3
Immunoglobulin kappa variable 2D-40 [OS=Homo sapiens];Immunoglobulin kappa variable 2D-28 [OS=Homo sapiens]	P01614;P01615	P01614;P01615	P01614	SUBCELLULAR LOCATION: Secreted {ECO:0000303|PubMed:20176268, ECO:0000303|PubMed:22158414}. Cell membrane {ECO:0000303|PubMed:20176268, ECO:0000303|PubMed:22158414}.	blood microparticle [GO:0072562]; extracellular exosome [GO:0070062]; extracellular region [GO:0005576]; extracellular space [GO:0005615]; plasma membrane [GO:0005886]	1		3		18166.4	50412.7	45061.1	44732.7	53193.9	24554.7	73467.6	30070	45352.9	47139.9	22874.4	44898.5	32252.6	60007.1	52944.4	33026.9	58219	27540.3	54534.1	47250	96045.1	321992	109264	143338	125193
Immunoglobulin kappa variable 3-20 [OS=Homo sapiens]	P01619	P01619	P01619	SUBCELLULAR LOCATION: Secreted {ECO:0000303|PubMed:20176268, ECO:0000303|PubMed:22158414}. Cell membrane {ECO:0000303|PubMed:20176268, ECO:0000303|PubMed:22158414}.	blood microparticle [GO:0072562]; extracellular exosome [GO:0070062]; extracellular region [GO:0005576]; extracellular space [GO:0005615]; monomeric IgA immunoglobulin complex [GO:0071748]; pentameric IgM immunoglobulin complex [GO:0071756]; plasma membrane [GO:0005886]; secretory IgA immunoglobulin complex [GO:0071751]	1		3		80443.6	59789.7	31460	71661.2	72202.6	108417	76641.9	26940	64986.7	74659.1	76736.3	61625	25957.4	113066	101041	45724.4	72357.8	28952.9	82773.7	75073.2	444538	922814	163848	316502	251723
Immunoglobulin lambda variable 1-47 [OS=Homo sapiens]	P01700	P01700	P01700	SUBCELLULAR LOCATION: Secreted {ECO:0000303|PubMed:20176268, ECO:0000303|PubMed:22158414}. Cell membrane {ECO:0000303|PubMed:20176268, ECO:0000303|PubMed:22158414}.	blood microparticle [GO:0072562]; extracellular region [GO:0005576]; extracellular space [GO:0005615]; plasma membrane [GO:0005886]	1		3		23729.1	23401.6	14942.8	16680.1	21978.7	23703.6	27819.4	10789.1	16241.9	21213.8	26227.1	22653.9	10252.9	35358	21459.9	15256.3	27379.1	11914.3	19851.4	17236.8	130558	240046	89444.2	101762	92632.6
Immunoglobulin heavy variable 3-30 [OS=Homo sapiens]	P01768	P01768	P01768	SUBCELLULAR LOCATION: Secreted {ECO:0000303|PubMed:20176268, ECO:0000303|PubMed:22158414}. Cell membrane {ECO:0000303|PubMed:20176268, ECO:0000303|PubMed:22158414}.	external side of plasma membrane [GO:0009897]; extracellular region [GO:0005576]; extracellular space [GO:0005615]; immunoglobulin complex, circulating [GO:0042571]; plasma membrane [GO:0005886]	1		3		15775.7	6933.02	4783.57	33007.2	30363.2	49744.4	8973	Filtered	28361	29725	25785.6	10213.8	3985.9	28848.5	32608.6	27032.7	7366.78	5436.78	55787.8	21763.3	52707	55383.8	16963.1	48317.3	35875.8
Immunoglobulin heavy variable 3-7 [OS=Homo sapiens]	P01780	P01780	P01780	SUBCELLULAR LOCATION: Secreted {ECO:0000303|PubMed:20176268, ECO:0000303|PubMed:22158414}. Cell membrane {ECO:0000303|PubMed:20176268, ECO:0000303|PubMed:22158414}.	blood microparticle [GO:0072562]; external side of plasma membrane [GO:0009897]; extracellular exosome [GO:0070062]; extracellular region [GO:0005576]; immunoglobulin complex, circulating [GO:0042571]; plasma membrane [GO:0005886]			3		29734	41965	7510.4	173799	133725	78863	28391.9	6678.07	107484	75719.6	47705	72257.8	10278.1	141001	143685	103465	17964	21322	150425	104266	337171	473761	57633.3	268686	195577
Immunoglobulin heavy variable 3-9 [OS=Homo sapiens];Immunoglobulin heavy variable 3-43D [OS=Homo sapiens]	P01782;P0DP04	P01782;P0DP04	P01782	SUBCELLULAR LOCATION: Secreted {ECO:0000303|PubMed:20176268, ECO:0000303|PubMed:22158414}. Cell membrane {ECO:0000303|PubMed:20176268, ECO:0000303|PubMed:22158414}.	external side of plasma membrane [GO:0009897]; extracellular exosome [GO:0070062]; extracellular region [GO:0005576]; immunoglobulin complex, circulating [GO:0042571]; plasma membrane [GO:0005886]			3		Filtered	Filtered	Filtered	Filtered	Filtered	Filtered	Filtered	Filtered	Filtered	Filtered	Filtered	1709.33	Filtered	Filtered	Filtered	Filtered	Filtered	Filtered	Filtered	Filtered	11050.5	7041.74	5321.3	8076.09	6935.02
immunoglobulin kappa constant [OS=Homo sapiens]	P01834	P01834	P01834	SUBCELLULAR LOCATION: Secreted {ECO:0000303|PubMed:20176268, ECO:0000303|PubMed:22158414}. Cell membrane {ECO:0000303|PubMed:20176268, ECO:0000303|PubMed:22158414}.	blood microparticle [GO:0072562]; external side of plasma membrane [GO:0009897]; extracellular exosome [GO:0070062]; extracellular region [GO:0005576]; extracellular space [GO:0005615]; immunoglobulin complex, circulating [GO:0042571]; plasma membrane [GO:0005886]	1		3		354943	324383	172439	153931	103539	252894	718783	256511	147054	112391	210206	330904	245899	146198	89907.1	375214	481118	533064	95322.5	90185.3	1.2608e+06	2.40248e+06	1.37483e+06	351655	329112
Immunoglobulin heavy constant gamma 2 [OS=Homo sapiens]	P01859	P01859	P01859	SUBCELLULAR LOCATION: Secreted {ECO:0000303|PubMed:20176268, ECO:0000303|PubMed:22158414}. Cell membrane {ECO:0000303|PubMed:20176268, ECO:0000303|PubMed:22158414}.	blood microparticle [GO:0072562]; external side of plasma membrane [GO:0009897]; extracellular exosome [GO:0070062]; extracellular region [GO:0005576]; extracellular space [GO:0005615]; immunoglobulin complex, circulating [GO:0042571]	1		3		283624	157213	147777	373939	275684	483201	154937	139484	297353	229708	334893	165992	129045	440979	267798	357141	239412	135439	388118	279296	1.08839e+06	681148	510784	924633	540393
Immunoglobulin heavy constant gamma 3 [OS=Homo sapiens]	P01860	P01860	P01860	SUBCELLULAR LOCATION: Secreted {ECO:0000303|PubMed:20176268, ECO:0000303|PubMed:22158414}. Cell membrane {ECO:0000303|PubMed:20176268, ECO:0000303|PubMed:22158414}.	blood microparticle [GO:0072562]; external side of plasma membrane [GO:0009897]; extracellular exosome [GO:0070062]; extracellular region [GO:0005576]; extracellular space [GO:0005615]; immunoglobulin complex, circulating [GO:0042571]	1		3		44934.5	10938.6	52486.5	37490.2	30779.7	147968	32365.8	34085.2	28639.5	18469	52828	28358.8	43065.7	40749	27545.6	74891	19235.3	36829.4	46660.8	23564.2	85489.1	46090.9	51970.1	37969	20545.4
Immunoglobulin heavy constant gamma 4 [OS=Homo sapiens]	P01861	P01861	P01861	SUBCELLULAR LOCATION: Secreted {ECO:0000303|PubMed:20176268, ECO:0000303|PubMed:22158414}. Cell membrane {ECO:0000303|PubMed:20176268, ECO:0000303|PubMed:22158414}.	blood microparticle [GO:0072562]; external side of plasma membrane [GO:0009897]; extracellular exosome [GO:0070062]; extracellular region [GO:0005576]; extracellular space [GO:0005615]; immunoglobulin complex, circulating [GO:0042571]	1		3		10591.9	639.404	5346.17	6232.19	9398.59	11071.3	9615.64	4820.88	7931.63	14343.8	19979.5	6782.34	3226.81	9137.08	9955.21	13982.2	8926.25	645.841	7989.3	14496	70973	19646.6	27410.6	34632.9	23479.6
immunoglobulin heavy constant mu [OS=Homo sapiens];Isoform 2 of Immunoglobulin heavy constant mu [OS=Homo sapiens]	P01871;P01871-2	P01871;P01871-2	P01871	SUBCELLULAR LOCATION: Isoform 1: Secreted. Note=During differentiation, B-lymphocytes switch from expression of membrane-bound IgM to secretion of IgM.; SUBCELLULAR LOCATION: Isoform 2: Cell membrane; Single-pass type I membrane protein.	blood microparticle [GO:0072562]; cell surface [GO:0009986]; external side of plasma membrane [GO:0009897]; extracellular exosome [GO:0070062]; extracellular space [GO:0005615]; hexameric IgM immunoglobulin complex [GO:0071757]; immunoglobulin complex, circulating [GO:0042571]; integral component of membrane [GO:0016021]; pentameric IgM immunoglobulin complex [GO:0071756]; plasma membrane [GO:000…	1		3		95855.3	76006.9	76402.5	92634.2	96048.7	84373.9	83211.1	57229.1	76061.7	95685.1	111057	74771.8	50823.9	114049	94758.9	103157	106176	58484.9	110209	96509.2	154563	181692	104023	136599	109968
immunoglobulin heavy constant alpha 1 [OS=Homo sapiens]	P01876	P01876	P01876	SUBCELLULAR LOCATION: Secreted {ECO:0000303|PubMed:20176268, ECO:0000303|PubMed:22158414}. Cell membrane {ECO:0000303|PubMed:20176268, ECO:0000303|PubMed:22158414}.	blood microparticle [GO:0072562]; external side of plasma membrane [GO:0009897]; extracellular exosome [GO:0070062]; extracellular region [GO:0005576]; extracellular space [GO:0005615]; immunoglobulin complex, circulating [GO:0042571]; monomeric IgA immunoglobulin complex [GO:0071748]; secretory dimeric IgA immunoglobulin complex [GO:0071752]; secretory IgA immunoglobulin complex [GO:0071751]	1		3		80735.8	92628.2	73342.6	104832	92782.2	153757	166290	68571.7	85786.3	98063.2	150753	125502	64165.7	173559	126641	189346	137279	79178.9	123880	88691.7	2242723	1.90978e+06	718448	1.14164e+06	721105
Immunoglobulin heavy constant alpha 2 [OS=Homo sapiens]	P01877	P01877	P01877	SUBCELLULAR LOCATION: Secreted {ECO:0000303|PubMed:20176268, ECO:0000303|PubMed:22158414}. Cell membrane {ECO:0000303|PubMed:20176268, ECO:0000303|PubMed:22158414}.	blood microparticle [GO:0072562]; external side of plasma membrane [GO:0009897]; extracellular exosome [GO:0070062]; extracellular region [GO:0005576]; extracellular space [GO:0005615]; immunoglobulin complex, circulating [GO:0042571]; monomeric IgA immunoglobulin complex [GO:0071748]; secretory dimeric IgA immunoglobulin complex [GO:0071752]; secretory IgA immunoglobulin complex [GO:0071751]	1		3		101728	130287	111291	146017	161114	198243	234561	95260.5	121167	170931	220390	167372	92307.2	262057	268371	226016	233573	94147.9	143217	119606	2.88261e+06	3.07988e+06	1131882	1.3955e+06	1.13805e+06
HLA class I histocompatibility antigen, A-68 alpha chain [OS=Homo sapiens]	P01891	P01891	P01891	SUBCELLULAR LOCATION: Membrane; Single-pass type I membrane protein.	cell surface [GO:0009986]; early endosome membrane [GO:0031901]; endoplasmic reticulum [GO:0005783]; ER to Golgi transport vesicle membrane [GO:0012507]; external side of plasma membrane [GO:0009897]; extracellular space [GO:0005615]; Golgi apparatus [GO:0005794]; Golgi membrane [GO:0000139]; integral component of lumenal side of endoplasmic reticulum membrane [GO:0071556]; MHC class I protein co…	1		3		Filtered	Filtered	Filtered	Filtered	Filtered	Filtered	3949.8	Filtered	Filtered	Filtered	Filtered	Filtered	Filtered	Filtered	Filtered	Filtered	Filtered	Filtered	Filtered	Filtered	25067.6	38058.2	30552.1	38419.9	30010
HLA class II histocompatibility antigen, DR alpha chain [OS=Homo sapiens]	P01903	P01903	P01903	SUBCELLULAR LOCATION: Cell membrane; Single-pass type I membrane protein. Endoplasmic reticulum membrane; Single-pass type I membrane protein. Golgi apparatus, trans-Golgi network membrane; Single-pass type I membrane protein. Endosome membrane; Single-pass type I membrane protein. Lysosome membrane; Single-pass type I membrane protein. Late endosome membrane; Single-pass type I membrane protein.…	cell surface [GO:0009986]; clathrin-coated endocytic vesicle membrane [GO:0030669]; endocytic vesicle membrane [GO:0030666]; ER to Golgi transport vesicle membrane [GO:0012507]; extracellular exosome [GO:0070062]; Golgi membrane [GO:0000139]; integral component of lumenal side of endoplasmic reticulum membrane [GO:0071556]; integral component of plasma membrane [GO:0005887]; late endosome membran…			3		6100.12	8409.92	5540.7	3781.03	3786.98	Filtered	7705.49	6010.98	5239.92	3555.59	Filtered	7989.22	5431.51	6375.25	3204.19	7484.79	8282.05	4488.84	4450.43	3353.97	19399.1	30913.6	23678.9	11484.4	9476.73
Hemoglobin subunit delta [OS=Homo sapiens]	P02042	P02042	P02042	0	blood microparticle [GO:0072562]; cytosol [GO:0005829]; haptoglobin-hemoglobin complex [GO:0031838]; hemoglobin complex [GO:0005833]		2			170046	277832	417741	278535	345298	464687	483425	336947	299433	606031	530041	345890	270620	536513	383343	1188704	1.00735e+06	289925	903227	567773	674597	635969	273888	334144	243348
Hemoglobin subunit epsilon [OS=Homo sapiens]	P02100	P02100	P02100	0	blood microparticle [GO:0072562]; cytosol [GO:0005829]; haptoglobin-hemoglobin complex [GO:0031838]; hemoglobin complex [GO:0005833]		2			51544.1	1350451	3.92319e+06	529633	300120	Filtered	Filtered	1.85766e+06	Filtered	464438	Filtered	1.51177e+06	1.99127e+06	Filtered	254085	Filtered	2.34461e+06	1.98188e+06	901955	462724	Filtered	Filtered	1.85731e+06	365902	274152
Collagen alpha-1(I) chain [OS=Homo sapiens]	P02452	P02452	P02452	SUBCELLULAR LOCATION: Secreted, extracellular space, extracellular matrix {ECO:0000255|PROSITE-ProRule:PRU00793}.	collagen-containing extracellular matrix [GO:0062023]; collagen type I trimer [GO:0005584]; cytoplasm [GO:0005737]; endoplasmic reticulum lumen [GO:0005788]; extracellular matrix [GO:0031012]; extracellular region [GO:0005576]; extracellular space [GO:0005615]; Golgi apparatus [GO:0005794]; secretory granule [GO:0030141]	1	2			31348.8	53079.8	143970	5546.33	30243.6	90309.5	129477	141376	3515.58	22349.9	25777	186594	119059	11183.2	16421.6	132192	36931.8	132398	6559.8	38565.9	213247	228403	180318	13229.6	36101.5
Collagen alpha-1(III) chain [OS=Homo sapiens]	P02461	P02461	P02461	SUBCELLULAR LOCATION: Secreted, extracellular space, extracellular matrix {ECO:0000255|PROSITE-ProRule:PRU00793}.	collagen-containing extracellular matrix [GO:0062023]; collagen type III trimer [GO:0005586]; endoplasmic reticulum lumen [GO:0005788]; extracellular matrix [GO:0031012]; extracellular region [GO:0005576]; extracellular space [GO:0005615]	1				Filtered	21391.1	21099.5	5220.59	15645.4	Filtered	45204.8	33734.8	6176.24	16493.3	Filtered	45632.7	21089.1	12707.7	12064.6	63976.5	Filtered	21707.3	8305.54	30708.7	50415.2	58795.3	43878.3	13812.1	38530.1
Collagen alpha-1(IV) chain [OS=Homo sapiens];Isoform 2 of Collagen alpha-1(IV) chain [OS=Homo sapiens]	P02462;P02462-2	P02462;P02462-2	P02462	SUBCELLULAR LOCATION: Secreted, extracellular space, extracellular matrix, basement membrane {ECO:0000250|UniProtKB:P02463}.	basement membrane [GO:0005604]; collagen-containing extracellular matrix [GO:0062023]; collagen type IV trimer [GO:0005587]; endoplasmic reticulum lumen [GO:0005788]; extracellular matrix [GO:0031012]; extracellular region [GO:0005576]; extracellular space [GO:0005615]	1		3		13880.9	15898.7	24551.1	14960	43904.2	62418.5	15362.7	29143.1	14398.3	28065.9	17678.8	32909.4	23226.8	18672.4	31301.6	58098.1	9626.65	26442.9	20383.7	38711.1	75046.9	40862.8	40727.3	40929.8	63694.4
Alpha-crystallin B chain [OS=Homo sapiens]	P02511	P02511	P02511	SUBCELLULAR LOCATION: Cytoplasm {ECO:0000269|PubMed:19464326, ECO:0000269|PubMed:28493373}. Nucleus {ECO:0000269|PubMed:19464326}. Note=Translocates to the nucleus during heat shock and resides in sub-nuclear structures known as SC35 speckles or nuclear splicing speckles (PubMed:19464326). Localizes at the Z-bands and the intercalated disk in cardiomyocytes (PubMed:28493373). {ECO:0000269|PubMed:…	actin filament bundle [GO:0032432]; axon [GO:0030424]; cardiac myofibril [GO:0097512]; cell surface [GO:0009986]; cytoplasm [GO:0005737]; cytosol [GO:0005829]; dendritic spine [GO:0043197]; extracellular exosome [GO:0070062]; Golgi apparatus [GO:0005794]; M band [GO:0031430]; microtubule cytoskeleton [GO:0015630]; mitochondrion [GO:0005739]; nucleoplasm [GO:0005654]; nucleus [GO:0005634]; perikar…		2	3	4	31638.8	15234.1	11409.2	11181.5	12302.2	51781.1	28922.8	12569.8	10276.9	12107.4	76406	11095.7	11582.2	23045.9	7685.56	29769.3	12934.7	13805.2	12757.1	10808.3	69739.5	19511.5	28175.9	22355.3	15290.3
Keratin, type I cytoskeletal 14 [OS=Homo sapiens]	P02533	P02533	P02533	SUBCELLULAR LOCATION: Cytoplasm. Nucleus. Note=Expressed in both as a filamentous pattern.	basal part of cell [GO:0045178]; cell periphery [GO:0071944]; cytoplasm [GO:0005737]; cytosol [GO:0005829]; extracellular exosome [GO:0070062]; intermediate filament [GO:0005882]; keratin filament [GO:0045095]; nucleus [GO:0005634]		2		4	1.06718e+06	232783	858124	1.09955e+06	1.55078e+06	1.32914e+06	1.53644e+06	744542	931685	1.8713e+06	1.44172e+06	1044018	737264	2.14409e+06	1.63011e+06	925816	694681	705635	864642	1273727	667306	732000	951132	839902	1.14777e+06
Keratin, type II cytoskeletal 6A [OS=Homo sapiens]	P02538	P02538	P02538	0	cytosol [GO:0005829]; extracellular exosome [GO:0070062]; keratin filament [GO:0045095]; membrane [GO:0016020]; nucleus [GO:0005634]		2	3	4	484821	470070	640502	632109	919116	754561	804307	644117	506848	1.01598e+06	517717	605325	622324	1.19075e+06	884188	540134	410346	642806	530639	789193	673721	539886	626890	494773	685265
Prelamin-A/C [OS=Homo sapiens]	P02545	P02545	P02545	SUBCELLULAR LOCATION: Nucleus {ECO:0000269|PubMed:15372542}. Nucleus envelope {ECO:0000269|PubMed:29599122}. Nucleus lamina. Nucleus, nucleoplasm. Note=Farnesylation of prelamin-A/C facilitates nuclear envelope targeting and subsequent cleaveage by ZMPSTE24/FACE1 to remove the farnesyl group produces mature lamin-A/C, which can then be inserted into the nuclear lamina. EMD is required for proper …	cytosol [GO:0005829]; intermediate filament [GO:0005882]; lamin filament [GO:0005638]; nuclear envelope [GO:0005635]; nuclear lamina [GO:0005652]; nuclear membrane [GO:0031965]; nuclear speck [GO:0016607]; nucleoplasm [GO:0005654]; nucleus [GO:0005634]; perinuclear region of cytoplasm [GO:0048471]		2	3	4	142946	87006.7	202671	139556	192600	707125	146767	184935	122082	180712	240026	115743	170926	77799	156355	270148	109471	174895	160187	176309	429912	184199	380856	291203	223356
Isoform C of Prelamin-A/C [OS=Homo sapiens]	P02545-2	P02545-2	P02545	SUBCELLULAR LOCATION: Nucleus {ECO:0000269|PubMed:15372542}. Nucleus envelope {ECO:0000269|PubMed:29599122}. Nucleus lamina. Nucleus, nucleoplasm. Note=Farnesylation of prelamin-A/C facilitates nuclear envelope targeting and subsequent cleaveage by ZMPSTE24/FACE1 to remove the farnesyl group produces mature lamin-A/C, which can then be inserted into the nuclear lamina. EMD is required for proper …	cytosol [GO:0005829]; intermediate filament [GO:0005882]; lamin filament [GO:0005638]; nuclear envelope [GO:0005635]; nuclear lamina [GO:0005652]; nuclear membrane [GO:0031965]; nuclear speck [GO:0016607]; nucleoplasm [GO:0005654]; nucleus [GO:0005634]; perinuclear region of cytoplasm [GO:0048471]		2	3	4	9818.44	7175.48	8857.86	5169.11	8750.75	18573	11632.6	10654.2	6245.76	5054.91	10607.2	2583.24	9933.24	4795.12	6179.72	14000	6243.25	11116.3	6833.1	4775.6	15821.6	14884.7	14512.3	8632.6	11568.1
spectrin alpha chain, erythrocytic 1 [OS=Homo sapiens];Isoform 2 of Spectrin alpha chain, erythrocytic 1 [OS=Homo sapiens]	P02549-1;P02549-2	P02549-1;P02549-2	P02549	SUBCELLULAR LOCATION: Cytoplasm, cytoskeleton. Cytoplasm, cell cortex.	actin cytoskeleton [GO:0015629]; axon [GO:0030424]; cuticular plate [GO:0032437]; cytosol [GO:0005829]; intrinsic component of the cytoplasmic side of the plasma membrane [GO:0031235]; spectrin [GO:0008091]; spectrin-associated cytoskeleton [GO:0014731]		2	3		Filtered	Filtered	9725.99	1560.62	4137.52	2.57412	Filtered	6567.02	3003.08	8228.14	Filtered	1650.04	3690.26	2918.81	4253.91	14287.9	10816.5	5256.69	10904.7	8033.34	Filtered	Filtered	8476.08	4683.02	3521.76
Apolipoprotein A-I [OS=Homo sapiens]	P02647	P02647	P02647	SUBCELLULAR LOCATION: Secreted.	blood microparticle [GO:0072562]; cell surface [GO:0009986]; chylomicron [GO:0042627]; collagen-containing extracellular matrix [GO:0062023]; cytoplasmic vesicle [GO:0031410]; cytosol [GO:0005829]; discoidal high-density lipoprotein particle [GO:0034365]; early endosome [GO:0005769]; endocytic vesicle [GO:0030139]; endocytic vesicle lumen [GO:0071682]; endoplasmic reticulum lumen [GO:0005788]; ex…	1	2	3	4	95420.2	116745	130776	89063.5	91838	101234	149776	138308	70267.2	106686	120834	101194	132537	65967.8	75705.9	84039.1	146115	129162	74151.8	81211.9	100195	107436	99925.4	38043.8	55094.2
Apolipoprotein E [OS=Homo sapiens]	P02649	P02649	P02649	SUBCELLULAR LOCATION: Secreted {ECO:0000269|PubMed:2498325}. Secreted, extracellular space {ECO:0000269|PubMed:8340399}. Secreted, extracellular space, extracellular matrix {ECO:0000269|PubMed:9488694}. Note=In the plasma, APOE is associated with chylomicrons, chylomicrons remnants, VLDL, LDL and HDL lipoproteins (PubMed:1911868, PubMed:8340399). Lipid poor oligomeric APOE is associated with the …	blood microparticle [GO:0072562]; chylomicron [GO:0042627]; clathrin-coated endocytic vesicle membrane [GO:0030669]; collagen-containing extracellular matrix [GO:0062023]; cytoplasm [GO:0005737]; dendrite [GO:0030425]; discoidal high-density lipoprotein particle [GO:0034365]; early endosome [GO:0005769]; endocytic vesicle lumen [GO:0071682]; endoplasmic reticulum [GO:0005783]; endoplasmic reticul…	1	2	3	4	232939	206823	183096	245233	295953	342871	275848	223228	200910	271410	304168	197932	206659	206207	286760	301700	217402	191544	214043	272693	255065	244032	147413	110741	122750
Apolipoprotein C-I [OS=Homo sapiens]	P02654	P02654	P02654	SUBCELLULAR LOCATION: Secreted {ECO:0000303|PubMed:2835369}.	chylomicron [GO:0042627]; endoplasmic reticulum [GO:0005783]; extracellular region [GO:0005576]; high-density lipoprotein particle [GO:0034364]; very-low-density lipoprotein particle [GO:0034361]					Filtered	30253.9	75933.1	8531.75	9076.65	Filtered	57093.2	65341.8	6702.74	8898.92	Filtered	23380	68883.7	5267.28	8872.63	Filtered	23761	68962.5	6031.3	5121.82	Filtered	30412.2	34449.5	Filtered	6721.42
Apolipoprotein C-III [OS=Homo sapiens]	P02656	P02656	P02656	SUBCELLULAR LOCATION: Secreted {ECO:0000303|PubMed:18201179, ECO:0000303|PubMed:22510806}.	chylomicron [GO:0042627]; collagen-containing extracellular matrix [GO:0062023]; early endosome [GO:0005769]; extracellular exosome [GO:0070062]; extracellular region [GO:0005576]; extracellular space [GO:0005615]; intermediate-density lipoprotein particle [GO:0034363]; spherical high-density lipoprotein particle [GO:0034366]; very-low-density lipoprotein particle [GO:0034361]	1				32401.3	35914	26450.6	30243.1	35629.6	48667.1	50568.2	30246.8	34001	33156.1	38258.1	38476.8	30221.8	24040.8	32537.4	84393.4	33285.7	26261.6	24388	16569.3	44926.8	49042.2	21521.3	29153.9	18587.4
Fibrinogen alpha chain [OS=Homo sapiens]	P02671-1	P02671-1	P02671	SUBCELLULAR LOCATION: Secreted {ECO:0000269|PubMed:19296670, ECO:0000269|PubMed:9628725}.	blood microparticle [GO:0072562]; cell cortex [GO:0005938]; cell surface [GO:0009986]; collagen-containing extracellular matrix [GO:0062023]; endoplasmic reticulum lumen [GO:0005788]; external side of plasma membrane [GO:0009897]; extracellular exosome [GO:0070062]; extracellular region [GO:0005576]; extracellular space [GO:0005615]; extracellular vesicle [GO:1903561]; fibrinogen complex [GO:0005…	1		3		259080	138864	302909	319617	420982	658886	348890	311870	266790	350958	284191	283726	317442	258658	335711	457031	237712	305080	307277	306967	439818	360691	199774	268125	322462
Isoform 2 of Fibrinogen alpha chain [OS=Homo sapiens]	P02671-2	P02671-2	P02671	SUBCELLULAR LOCATION: Secreted {ECO:0000269|PubMed:19296670, ECO:0000269|PubMed:9628725}.	blood microparticle [GO:0072562]; cell cortex [GO:0005938]; cell surface [GO:0009986]; collagen-containing extracellular matrix [GO:0062023]; endoplasmic reticulum lumen [GO:0005788]; external side of plasma membrane [GO:0009897]; extracellular exosome [GO:0070062]; extracellular region [GO:0005576]; extracellular space [GO:0005615]; extracellular vesicle [GO:1903561]; fibrinogen complex [GO:0005…	1		3		69058.2	10011.1	9569.59	35278.1	42786	51772.5	11690.5	7587.55	21357	18913.2	99327.2	11294.6	10498.7	31799.8	33804.8	51036.6	8223.59	10206.9	18308.7	20216.9	47614.7	11456.2	6735.98	14314.8	39437.6
Fibrinogen beta chain [OS=Homo sapiens]	P02675	P02675	P02675	SUBCELLULAR LOCATION: Secreted {ECO:0000269|PubMed:10074346, ECO:0000269|PubMed:19296670, ECO:0000269|PubMed:9628725}.	blood microparticle [GO:0072562]; cell cortex [GO:0005938]; cell surface [GO:0009986]; collagen-containing extracellular matrix [GO:0062023]; endoplasmic reticulum [GO:0005783]; external side of plasma membrane [GO:0009897]; extracellular exosome [GO:0070062]; extracellular region [GO:0005576]; extracellular space [GO:0005615]; extracellular vesicle [GO:1903561]; fibrinogen complex [GO:0005577]; …	1		3		140780	136067	269734	227023	325293	241190	233218	278384	196983	305209	212341	192254	268911	199319	345741	345925	232038	282687	245253	309703	212484	232376	212183	236339	253337
Fibrinogen gamma chain [OS=Homo sapiens]	P02679	P02679	P02679	SUBCELLULAR LOCATION: Secreted {ECO:0000269|PubMed:10074346, ECO:0000269|PubMed:19296670, ECO:0000269|PubMed:9628725}.	blood microparticle [GO:0072562]; cell surface [GO:0009986]; collagen-containing extracellular matrix [GO:0062023]; endoplasmic reticulum lumen [GO:0005788]; external side of plasma membrane [GO:0009897]; extracellular exosome [GO:0070062]; extracellular region [GO:0005576]; extracellular space [GO:0005615]; fibrinogen complex [GO:0005577]; plasma membrane [GO:0005886]; platelet alpha granule [GO…	1		3		Filtered	Filtered	7295.5	7516.43	Filtered	Filtered	Filtered	8151.2	9816.69	6193.91	Filtered	4285.94	8735.25	4147.2	7638.12	Filtered	5496.36	7598.04	8008.99	6695.68	Filtered	2896.71	5654.48	9408.75	9892.2
Isoform Gamma-A of Fibrinogen gamma chain [OS=Homo sapiens]	P02679-2	P02679-2	P02679	SUBCELLULAR LOCATION: Secreted {ECO:0000269|PubMed:10074346, ECO:0000269|PubMed:19296670, ECO:0000269|PubMed:9628725}.	blood microparticle [GO:0072562]; cell surface [GO:0009986]; collagen-containing extracellular matrix [GO:0062023]; endoplasmic reticulum lumen [GO:0005788]; external side of plasma membrane [GO:0009897]; extracellular exosome [GO:0070062]; extracellular region [GO:0005576]; extracellular space [GO:0005615]; fibrinogen complex [GO:0005577]; plasma membrane [GO:0005886]; platelet alpha granule [GO…	1		3		82147.3	99161.3	277622	98655.2	133467	113336	162009	265757	109786	142246	78768.5	141043	262657	95703.8	117369	196508	156692	264085	112668	119403	112887	167657	184152	95758.3	126879
Band 3 anion transport protein [OS=Homo sapiens];Isoform 2 of Band 3 anion transport protein [OS=Homo sapiens]	P02730;P02730-2	P02730;P02730-2	P02730	SUBCELLULAR LOCATION: Cell membrane {ECO:0000269|PubMed:10926824, ECO:0000269|PubMed:24121512, ECO:0000269|PubMed:26542571, ECO:0000269|PubMed:7506871}; Multi-pass membrane protein {ECO:0000269|PubMed:26542571}. Basolateral cell membrane {ECO:0000269|PubMed:7506871}; Multi-pass membrane protein {ECO:0000269|PubMed:7506871}. Note=Detected in the erythrocyte cell membrane and on the basolateral mem…	basolateral plasma membrane [GO:0016323]; blood microparticle [GO:0072562]; cortical cytoskeleton [GO:0030863]; extracellular exosome [GO:0070062]; integral component of membrane [GO:0016021]; integral component of plasma membrane [GO:0005887]; plasma membrane [GO:0005886]; Z disc [GO:0030018]			3		15540.5	37262.3	55403.9	39584.6	59129.9	15187.7	44303	52696.5	34558.9	108514	35483.8	38373.8	39301.1	49933.2	52619.8	79810.5	164500	44904	105243	125262	26465.2	41084.5	39444.9	44273.6	36607.3
C-reactive protein [OS=Homo sapiens]	P02741-1	P02741-1	P02741	SUBCELLULAR LOCATION: Secreted.	extracellular region [GO:0005576]; extracellular space [GO:0005615]	1				30120.3	30791.4	11990.7	35595.3	38066.5	85729.4	59752.7	14785.5	39208.9	40699.7	42792.9	39702.8	14842.1	72663.4	51055.5	44964.6	31631	18402.6	32995	32870.2	115307	122158	33495.2	56783	63705.6
Serum amyloid P-component [OS=Homo sapiens]	P02743	P02743	P02743	SUBCELLULAR LOCATION: Secreted.	blood microparticle [GO:0072562]; collagen-containing extracellular matrix [GO:0062023]; extracellular exosome [GO:0070062]; extracellular region [GO:0005576]; extracellular space [GO:0005615]; nucleus [GO:0005634]	1			4	36142.9	63144	84427	44501.3	45083.4	13259.5	117536	64268.4	52442.4	56268.7	28701.2	69947.5	56641.7	100228	47799	23174.7	84828	76332.2	77126.1	67850.1	47354	176695	96318.7	47284.7	47908.6
Complement C1q subcomponent subunit A [OS=Homo sapiens]	P02745	P02745	P02745	SUBCELLULAR LOCATION: Secreted.	amyloid-beta complex [GO:0106003]; cell [GO:0005623]; collagen-containing extracellular matrix [GO:0062023]; collagen trimer [GO:0005581]; complement component C1 complex [GO:0005602]; extracellular region [GO:0005576]; postsynapse [GO:0098794]; synapse [GO:0045202]					Filtered	25839	11720.6	12477.5	14694.4	8559.49	24503.5	49808.7	18095.9	19166.5	8139.64	44147	40429	14941.9	13623.5	61484.4	13363.5	44649.2	19899.4	30936.8	56620.3	61776.4	48876.4	25210.1	32902.1
Complement C1q subcomponent subunit B [OS=Homo sapiens]	P02746	P02746	P02746	SUBCELLULAR LOCATION: Secreted.	blood microparticle [GO:0072562]; cell [GO:0005623]; collagen-containing extracellular matrix [GO:0062023]; collagen trimer [GO:0005581]; complement component C1 complex [GO:0005602]; extracellular region [GO:0005576]; postsynapse [GO:0098794]; synapse [GO:0045202]					11117.5	58160.6	51290.4	14758.2	19039.6	4241.04	44253.4	36600.6	16228.5	22990.2	8644.69	38159.2	50657.1	21199	20238.9	19227.4	41627.9	34330.1	20927.1	21716.3	17142.3	107746	133372	35096.2	35913.1
Complement C1q subcomponent subunit C [OS=Homo sapiens]	P02747	P02747	P02747	SUBCELLULAR LOCATION: Secreted.	blood microparticle [GO:0072562]; cell [GO:0005623]; collagen-containing extracellular matrix [GO:0062023]; collagen trimer [GO:0005581]; extracellular region [GO:0005576]; extracellular space [GO:0005615]; postsynapse [GO:0098794]; synapse [GO:0045202]	1				22527.5	20045.3	32742.9	21166.1	30053.4	39022.4	40660.2	32679.5	24650.3	35547.5	53300.2	26534	33102.6	38894	31975.5	36126.3	31639.7	33252.7	32687.4	30398.3	121121	101437	107581	64031.1	60520.1
complement component C9 [OS=Homo sapiens]	P02748	P02748	P02748	SUBCELLULAR LOCATION: Secreted {ECO:0000269|PubMed:22832194, ECO:0000269|PubMed:26841934, ECO:0000269|PubMed:8603752, ECO:0000269|PubMed:9212048, ECO:0000269|PubMed:9634479}. Target cell membrane {ECO:0000269|PubMed:26841934, ECO:0000269|PubMed:30111885, ECO:0000269|PubMed:9212048}; Multi-pass membrane protein {ECO:0000269|PubMed:26841934}. Note=Secreted as soluble monomer. Oligomerizes at target…	blood microparticle [GO:0072562]; cytosol [GO:0005829]; extracellular exosome [GO:0070062]; extracellular region [GO:0005576]; extracellular space [GO:0005615]; membrane attack complex [GO:0005579]; other organism cell membrane [GO:0044218]; plasma membrane [GO:0005886]	1	2	3		19634.2	19279.8	41503.7	25802.7	37132.6	24052.3	27186.4	36076	25201.8	44777.8	23854.2	19506.7	33296.1	21622.7	35263.6	35259.7	30883.7	29539.1	36178.1	41559.8	20861.4	17987.4	30199.6	19138.6	22980.6
Beta-2-glycoprotein 1 [OS=Homo sapiens]	P02749	P02749	P02749	SUBCELLULAR LOCATION: Secreted.	cell surface [GO:0009986]; chylomicron [GO:0042627]; collagen-containing extracellular matrix [GO:0062023]; extracellular exosome [GO:0070062]; extracellular region [GO:0005576]; extracellular space [GO:0005615]; high-density lipoprotein particle [GO:0034364]; platelet dense granule lumen [GO:0031089]; very-low-density lipoprotein particle [GO:0034361]	1				37461.9	26988.6	46480.7	36288	33441	57280.1	46816.6	48595.7	26397.4	30268.1	55023.1	35544.7	49222.9	30236.4	32476.4	48279.8	40933	49562.2	36734.9	34813.1	36790.6	33781.1	22322.3	20359.2	22381.6
Leucine-rich alpha-2-glycoprotein [OS=Homo sapiens]	P02750	P02750	P02750	SUBCELLULAR LOCATION: Secreted.	extracellular exosome [GO:0070062]; extracellular region [GO:0005576]; extracellular space [GO:0005615]; ficolin-1-rich granule lumen [GO:1904813]; intracellular membrane-bounded organelle [GO:0043231]; membrane [GO:0016020]; specific granule lumen [GO:0035580]; tertiary granule lumen [GO:1904724]	1		3		57298.8	41429.1	28290.7	44124.1	40022.3	49580.7	61944.8	19428.8	48583.2	37512.8	99320.1	31687.9	17808.2	45344.7	40037.8	65940	20065.9	18459.8	45204.8	33246.8	97013.5	25825.1	22216.3	37041.3	24829.3
fibronectin [OS=Homo sapiens];Isoform 3 of Fibronectin [OS=Homo sapiens]	P02751;P02751-3	P02751;P02751-3	P02751	SUBCELLULAR LOCATION: Secreted, extracellular space, extracellular matrix {ECO:0000305|PubMed:29100092}.	apical plasma membrane [GO:0016324]; basement membrane [GO:0005604]; blood microparticle [GO:0072562]; collagen-containing extracellular matrix [GO:0062023]; endoplasmic reticulum-Golgi intermediate compartment [GO:0005793]; endoplasmic reticulum lumen [GO:0005788]; extracellular exosome [GO:0070062]; extracellular matrix [GO:0031012]; extracellular region [GO:0005576]; extracellular space [GO:00…	1		3		46946.6	79170.1	171844	95402	193202	114847	121356	158501	88488.4	210946	69483.2	101612	148135	94196.6	169750	133857	116044	161896	140669	199061	71547.9	88239.8	126955	95188.6	115220
Retinol-binding protein 4 [OS=Homo sapiens]	P02753	P02753	P02753	SUBCELLULAR LOCATION: Secreted {ECO:0000269|PubMed:12237133, ECO:0000269|PubMed:2444024, ECO:0000269|PubMed:5541771}.	cytosol [GO:0005829]; extracellular exosome [GO:0070062]; extracellular region [GO:0005576]; extracellular space [GO:0005615]; protein-containing complex [GO:0032991]	1	2			27573	22646.7	59594.1	100454	53330.7	40662.8	54070.9	28724.1	78336.4	43628.7	38194.7	22075.2	54682.1	97515.3	50476.8	38699.9	28096.9	69174.3	89000	39490.9	38526.1	27391.3	45382.3	94362.6	40801.6
Protein AMBP [OS=Homo sapiens]	P02760	P02760	P02760	SUBCELLULAR LOCATION: Secreted.	blood microparticle [GO:0072562]; cell surface [GO:0009986]; collagen-containing extracellular matrix [GO:0062023]; extracellular exosome [GO:0070062]; extracellular region [GO:0005576]; extracellular space [GO:0005615]; intracellular membrane-bounded organelle [GO:0043231]; plasma membrane [GO:0005886]	1		3		51819.2	47319.7	30826.2	84531.1	86403.5	55261.1	84242.4	31275.6	73774.2	71615	84427.3	58545.5	32534.7	87123.8	84411.1	73522.7	40103.1	35404.7	83265.2	80471.7	116947	67660.3	27929	57780.3	46320.1
Alpha-1-acid glycoprotein 1 [OS=Homo sapiens]	P02763	P02763	P02763	SUBCELLULAR LOCATION: Secreted.	blood microparticle [GO:0072562]; collagen-containing extracellular matrix [GO:0062023]; extracellular exosome [GO:0070062]; extracellular region [GO:0005576]; extracellular space [GO:0005615]; platelet alpha granule lumen [GO:0031093]; specific granule lumen [GO:0035580]; tertiary granule lumen [GO:1904724]	1				34260.5	63784.9	62007.9	60053.1	49135.1	235492	131332	60916.8	74627.4	43676.3	81003.4	70719.7	65404.8	75420	53279.5	45313.6	79551.3	74741.3	51812.8	38091.8	127666	85596.6	51867.9	40085	46878.3
Alpha-2-HS-glycoprotein [OS=Homo sapiens]	P02765	P02765	P02765	SUBCELLULAR LOCATION: Secreted.	blood microparticle [GO:0072562]; collagen-containing extracellular matrix [GO:0062023]; endoplasmic reticulum lumen [GO:0005788]; extracellular exosome [GO:0070062]; extracellular region [GO:0005576]; extracellular space [GO:0005615]; Golgi apparatus [GO:0005794]; platelet alpha granule lumen [GO:0031093]; secretory granule lumen [GO:0034774]	1				11583.5	7531.4	15911.9	11678.1	14030.4	Filtered	22325.1	13146.5	9692.94	7915.48	15937.4	17248.5	14593.3	14597.2	15342.8	25014	11574.6	18454.5	11210.9	11957.6	9545.73	35001	10766.8	9894.62	8124.95
Transthyretin [OS=Homo sapiens]	P02766	P02766	P02766	SUBCELLULAR LOCATION: Secreted. Cytoplasm.	azurophil granule lumen [GO:0035578]; extracellular exosome [GO:0070062]; extracellular region [GO:0005576]; extracellular space [GO:0005615]; protein-containing complex [GO:0032991]	1				38810.9	37849.2	23787.8	19482.2	17022.5	40484.4	52603.8	23131.3	22838	19340.5	66740.9	25053.4	22186	32601.5	18078	34283	44363.8	23620.7	20272.7	18785.9	43367.7	17925.9	8715.94	10890.7	10547
Serum albumin [OS=Homo sapiens]	P02768-1	P02768-1	P02768	SUBCELLULAR LOCATION: Secreted.	blood microparticle [GO:0072562]; endoplasmic reticulum [GO:0005783]; endoplasmic reticulum lumen [GO:0005788]; extracellular exosome [GO:0070062]; extracellular region [GO:0005576]; extracellular space [GO:0005615]; Golgi apparatus [GO:0005794]; nucleus [GO:0005634]; platelet alpha granule lumen [GO:0031093]; protein-containing complex [GO:0032991]	1			4	1.48235e+06	2.4984e+06	2977171	2.13062e+06	2.2298e+06	3.1244e+06	3.60643e+06	2.39619e+06	1.77094e+06	2.1058e+06	2.46205e+06	2.0841e+06	2438449	1.87098e+06	2.2742e+06	2684557	3.37181e+06	2.52756e+06	2.02167e+06	1.96482e+06	6.38617e+06	6423503	6.56738e+06	3.48418e+06	3.40042e+06
vitamin D-binding protein [OS=Homo sapiens];Isoform 3 of Vitamin D-binding protein [OS=Homo sapiens]	P02774;P02774-3	P02774;P02774-3	P02774	SUBCELLULAR LOCATION: Secreted {ECO:0000269|PubMed:2423133}.	blood microparticle [GO:0072562]; cytosol [GO:0005829]; extracellular exosome [GO:0070062]; extracellular region [GO:0005576]; extracellular space [GO:0005615]; lysosomal lumen [GO:0043202]	1	2			43039.3	20436.1	38538.6	9625.41	12553.1	17396.7	127164	22495	7765.34	11659	32908.9	12882.6	18551.2	8862.45	11099	21973	11965.1	28687.3	11004.6	10495.3	21513.3	12883.2	13914.2	6190.07	4820.55
Platelet factor 4 [OS=Homo sapiens]	P02776	P02776	P02776	SUBCELLULAR LOCATION: Secreted {ECO:0000269|PubMed:7644496}.	collagen-containing extracellular matrix [GO:0062023]; cytoplasm [GO:0005737]; extracellular region [GO:0005576]; extracellular space [GO:0005615]; other organism cytoplasm [GO:0097679]; platelet alpha granule lumen [GO:0031093]; symbiont-containing vacuole membrane [GO:0020005]	1	2	3		4879.99	3786.43	8224.88	Filtered	1416.34	Filtered	Filtered	6398.38	1211.99	Filtered	Filtered	Filtered	5343.7	Filtered	Filtered	Filtered	3674.34	7826.45	Filtered	Filtered	Filtered	Filtered	Filtered	6442.88	Filtered
Serotransferrin [OS=Homo sapiens]	P02787	P02787	P02787	SUBCELLULAR LOCATION: Secreted.	apical plasma membrane [GO:0016324]; basal part of cell [GO:0045178]; basal plasma membrane [GO:0009925]; blood microparticle [GO:0072562]; cell surface [GO:0009986]; clathrin-coated pit [GO:0005905]; clathrin-coated vesicle membrane [GO:0030665]; cytoplasmic vesicle [GO:0031410]; early endosome [GO:0005769]; endocytic vesicle [GO:0030139]; endoplasmic reticulum lumen [GO:0005788]; endosome membr…	1	2	3	4	131645	241714	316501	491793	339332	189901	356475	275599	410441	264331	115336	318262	306629	406586	349883	154259	258322	316162	448596	328145	98485.6	238343	163695	183612	127513
Lactotransferrin [OS=Homo sapiens];Isoform DeltaLf of Lactotransferrin [OS=Homo sapiens]	P02788;P02788-2	P02788;P02788-2	P02788	SUBCELLULAR LOCATION: Isoform 1: Secreted. Cytoplasmic granule. Note=Secreted into most exocrine fluids by various endothelial cells. Stored in the secondary granules of neutrophils.; SUBCELLULAR LOCATION: Isoform DeltaLf: Cytoplasm. Nucleus. Note=Mainly localized in the cytoplasm.	cell surface [GO:0009986]; cytoplasm [GO:0005737]; extracellular exosome [GO:0070062]; extracellular region [GO:0005576]; extracellular space [GO:0005615]; nucleus [GO:0005634]; other organism cell membrane [GO:0044218]; phagocytic vesicle lumen [GO:0097013]; protein-containing complex [GO:0032991]; secretory granule [GO:0030141]; specific granule [GO:0042581]; specific granule lumen [GO:0035580]…	1	2	3	4	26161.3	24903.6	25119.3	23360.5	24921.2	62656	43012.9	26720.9	23000	22580.3	41169.5	21390.8	27154.2	33965.2	28755.8	37034.6	43940.8	23444.6	34959.8	24567.1	52574.9	45638.9	33521.4	19054.2	25090.3
Hemopexin [OS=Homo sapiens]	P02790	P02790	P02790	SUBCELLULAR LOCATION: Secreted.	blood microparticle [GO:0072562]; collagen-containing extracellular matrix [GO:0062023]; endocytic vesicle lumen [GO:0071682]; extracellular exosome [GO:0070062]; extracellular region [GO:0005576]; extracellular space [GO:0005615]	1				156577	256307	192392	312973	270053	180916	368129	154993	250012	253424	187609	201869	165994	300943	279648	174767	216974	169712	253609	264310	123878	159286	88661.6	135831	103531
Ferritin light chain [OS=Homo sapiens]	P02792	P02792	P02792	0	autolysosome [GO:0044754]; azurophil granule lumen [GO:0035578]; cytoplasm [GO:0005737]; cytosol [GO:0005829]; extracellular exosome [GO:0070062]; extracellular region [GO:0005576]; intracellular ferritin complex [GO:0008043]; membrane [GO:0016020]		2	3		2.29627e+06	2.85795e+06	862886	1.59386e+06	1.59819e+06	2.17999e+06	3.24193e+06	874385	1.88627e+06	1625969	3.02892e+06	2.15847e+06	862960	2639412	1.67621e+06	1.84758e+06	1.99119e+06	848901	2.08674e+06	1.51927e+06	4.27308e+06	3608266	1.23848e+06	1.95185e+06	1.96523e+06
Ferritin heavy chain [OS=Homo sapiens]	P02794	P02794	P02794	0	autolysosome [GO:0044754]; cytoplasm [GO:0005737]; cytosol [GO:0005829]; extracellular exosome [GO:0070062]; extracellular region [GO:0005576]; ficolin-1-rich granule lumen [GO:1904813]; intracellular ferritin complex [GO:0008043]; nucleus [GO:0005634]; tertiary granule lumen [GO:1904724]		2		4	299505	464553	240546	313340	304866	467507	690990	197658	351152	275093	295253	425500	221148	559201	292294	222135	385204	225147	336971	263587	596673	685759	373583	446484	419763
metallothionein-2 [OS=Homo sapiens]	P02795	P02795	P02795	0	cytoplasm [GO:0005737]; cytosol [GO:0005829]; nucleus [GO:0005634]; perinuclear region of cytoplasm [GO:0048471]		2		4	3714.91	873.859	Filtered	6296.33	3883.07	7070.34	1976.17	743.724	5089.69	2144.83	9087.46	2906.62	2147.67	7569.56	3671.54	9963.75	938.484	8107.44	7214.67	1506.11	26950.4	7815.43	7933.41	4217.93	3824.99
NADH-ubiquinone oxidoreductase chain 1 [OS=Homo sapiens]	P03886	P03886	P03886	SUBCELLULAR LOCATION: Mitochondrion inner membrane {ECO:0000250}; Multi-pass membrane protein {ECO:0000250}.	dendrite [GO:0030425]; integral component of membrane [GO:0016021]; mitochondrial inner membrane [GO:0005743]; mitochondrial membrane [GO:0031966]; mitochondrial respiratory chain complex I [GO:0005747]; neuronal cell body [GO:0043025]			3		15683.3	20468.1	20061.1	11838.1	11002.3	11293.8	27362	22004.7	11409.2	13152.3	16504.4	23208	18447	13010.7	9368.9	Filtered	28053.5	20240	11838.1	12656	18431.8	32412.3	16031.6	10496.8	9735.52
NADH-ubiquinone oxidoreductase chain 2 [OS=Homo sapiens]	P03891	P03891	P03891	SUBCELLULAR LOCATION: Mitochondrion inner membrane; Multi-pass membrane protein.	integral component of membrane [GO:0016021]; mitochondrial inner membrane [GO:0005743]; mitochondrial respiratory chain complex I [GO:0005747]; postsynaptic density [GO:0014069]			3		8401.05	25516.1	25670.2	15865.6	15739.8	Filtered	44388.1	24690.9	15411.1	14073.4	2995.72	31238.5	24750	13525.5	14205.2	Filtered	26389.4	22496.1	12773.6	12897	4039.64	30312.1	18200.6	9453.44	9623.68
NADH-ubiquinone oxidoreductase chain 3 [OS=Homo sapiens]	P03897	P03897	P03897	SUBCELLULAR LOCATION: Mitochondrion membrane {ECO:0000250}; Multi-pass membrane protein {ECO:0000250}.	integral component of membrane [GO:0016021]; mitochondrial inner membrane [GO:0005743]; mitochondrial respiratory chain complex I [GO:0005747]; NADH dehydrogenase complex [GO:0030964]			3		Filtered	12153.1	10041.3	27484.2	12562.3	Filtered	Filtered	7469.36	22858.4	9254.58	Filtered	18688.5	9924.82	24037.6	11557.9	Filtered	9500.08	6381.42	20190	12810.6	Filtered	Filtered	6612.62	18611	9503.61
NADH-ubiquinone oxidoreductase chain 4 [OS=Homo sapiens]	P03905	P03905	P03905	SUBCELLULAR LOCATION: Mitochondrion membrane {ECO:0000250}; Multi-pass membrane protein {ECO:0000250}.	integral component of membrane [GO:0016021]; mitochondrial inner membrane [GO:0005743]; mitochondrial respiratory chain complex I [GO:0005747]			3		16467.1	21208.9	18035.9	8989.04	11162.4	13004	25184.6	15339.8	7145.61	10132.3	18195	21011.5	15633.2	9478.5	8697.54	15750.2	17045.7	18208.9	6786.2	9714.02	18930.6	30824.5	12869.5	6843.17	7418.55
NADH-ubiquinone oxidoreductase chain 5 [OS=Homo sapiens]	P03915	P03915	P03915	SUBCELLULAR LOCATION: Mitochondrion inner membrane {ECO:0000250}; Multi-pass membrane protein {ECO:0000250}.	integral component of membrane [GO:0016021]; mitochondrial inner membrane [GO:0005743]; mitochondrial respiratory chain complex I [GO:0005747]; neuron projection [GO:0043005]			3		18169.6	16833.2	11186.5	31362.3	32138	Filtered	19681.4	11321.8	30363.5	37518.4	7604.2	19978.2	11482.2	33614.5	16220.9	15140.6	13929.6	11147.2	19600.3	17037.6	18345.5	21516.5	10978.8	8553.44	20292.1
ATP synthase protein 8 [OS=Homo sapiens]	P03928	P03928	P03928	SUBCELLULAR LOCATION: Mitochondrion membrane; Single-pass membrane protein.	integral component of membrane [GO:0016021]; mitochondrial inner membrane [GO:0005743]; mitochondrial proton-transporting ATP synthase complex [GO:0005753]; mitochondrial proton-transporting ATP synthase complex, coupling factor F(o) [GO:0000276]			3		35914	18522.7	28393.4	6073.29	5804.91	28238.2	33183.3	32668.6	10006.9	5870	44182.6	17723.7	33304.9	13440.9	2719.06	27745.5	23685.6	30918.6	Filtered	6441.3	Filtered	22235.5	28346.8	Filtered	9826.04
Plasma kallikrein [OS=Homo sapiens]	P03952	P03952	P03952	SUBCELLULAR LOCATION: Secreted.	extracellular exosome [GO:0070062]; extracellular region [GO:0005576]; extracellular space [GO:0005615]; plasma membrane [GO:0005886]	1		3		Filtered	Filtered	Filtered	9370.8	10694.5	Filtered	Filtered	Filtered	8370.19	10315.8	Filtered	26827.2	Filtered	9526.29	9037.97	3.67734	Filtered	Filtered	10428.8	9163.71	7.01484	Filtered	Filtered	Filtered	9478.6
C4b-binding protein alpha chain [OS=Homo sapiens]	P04003	P04003	P04003	SUBCELLULAR LOCATION: Secreted.	blood microparticle [GO:0072562]; extracellular region [GO:0005576]; extracellular space [GO:0005615]; other organism cell [GO:0044216]; plasma membrane [GO:0005886]	1		3		38349.1	24921.7	36434.7	66792.5	54334.6	48192.2	23161.2	42212	49299.6	46887.9	36034.3	33096	43660.1	52971.1	56149.3	43816.3	25331.2	39207.3	71539.1	63097	59822.6	50333.2	47888.4	71309	46593.1
Vitronectin [OS=Homo sapiens]	P04004	P04004	P04004	SUBCELLULAR LOCATION: Secreted, extracellular space.	alphav-beta3 integrin-vitronectin complex [GO:0071062]; basement membrane [GO:0005604]; blood microparticle [GO:0072562]; collagen-containing extracellular matrix [GO:0062023]; endoplasmic reticulum [GO:0005783]; extracellular exosome [GO:0070062]; extracellular region [GO:0005576]; extracellular space [GO:0005615]; Golgi lumen [GO:0005796]; intracellular membrane-bounded organelle [GO:0043231]; …	1		3		159353	137380	206794	172748	235360	255395	154883	169416	163997	283474	331743	119509	155284	241098	210712	434249	193179	145115	281602	274831	434415	333716	157573	190122	139109
catalase [OS=Homo sapiens]	P04040	P04040	P04040	SUBCELLULAR LOCATION: Peroxisome.	cytosol [GO:0005829]; endoplasmic reticulum [GO:0005783]; extracellular exosome [GO:0070062]; extracellular region [GO:0005576]; ficolin-1-rich granule lumen [GO:1904813]; focal adhesion [GO:0005925]; Golgi apparatus [GO:0005794]; intracellular membrane-bounded organelle [GO:0043231]; lysosome [GO:0005764]; membrane [GO:0016020]; mitochondrial intermembrane space [GO:0005758]; peroxisomal matrix …		2	3		760204	973340	696892	1408692	1.36802e+06	1.31495e+06	1.57553e+06	712776	1320528	1.16425e+06	1.50297e+06	1.27316e+06	788994	1.52329e+06	1.37179e+06	1041889	1236067	838005	1407801	1.1923e+06	1.25155e+06	1.30174e+06	516827	947531	793045
glucosylceramidase [OS=Homo sapiens];Isoform Short of Glucosylceramidase [OS=Homo sapiens];Isoform 3 of Glucosylceramidase [OS=Homo sapiens];Isoform 4 of Glucosylceramidase [OS=Homo sapiens];Isoform 5 of Glucosylceramidase [OS=Homo sapiens]	P04062;P04062-2;P04062-3;P04062-4;P04062-5	P04062;P04062-2;P04062-3;P04062-4;P04062-5	P04062	SUBCELLULAR LOCATION: Lysosome membrane {ECO:0000269|PubMed:17187079, ECO:0000269|PubMed:17897319, ECO:0000269|PubMed:18022370}; Peripheral membrane protein {ECO:0000269|PubMed:10781797, ECO:0000269|PubMed:18022370, ECO:0000269|PubMed:1848227}; Lumenal side {ECO:0000269|PubMed:18022370}. Note=Interaction with saposin-C promotes membrane association (PubMed:10781797). Targeting to lysosomes occurs…	endoplasmic reticulum [GO:0005783]; extracellular exosome [GO:0070062]; extrinsic component of membrane [GO:0019898]; Golgi apparatus [GO:0005794]; lysosomal lumen [GO:0043202]; lysosomal membrane [GO:0005765]; lysosome [GO:0005764]; trans-Golgi network [GO:0005802]			3		18558.6	15213.1	10096.6	18710.6	12584.9	Filtered	13040.6	6345.85	8814.87	8464.85	Filtered	8190.93	6304.4	17382.4	13063.4	Filtered	7501.17	5882.46	12150.5	8104.17	Filtered	Filtered	4993.51	11767.9	2247.5
tissue alpha-L-fucosidase [OS=Homo sapiens]	P04066	P04066	P04066	SUBCELLULAR LOCATION: Lysosome.	azurophil granule lumen [GO:0035578]; cytoplasm [GO:0005737]; extracellular exosome [GO:0070062]; extracellular region [GO:0005576]; lysosomal lumen [GO:0043202]; lysosome [GO:0005764]		2			95279.3	117297	43620.8	75878.8	70234.1	40220.6	152014	39929.3	68106	71674.1	61905	84997.1	39099.6	127544	78245.9	39090.9	71643.3	42680.1	74630.8	59139.6	60130	88484.8	37429.5	55783.5	52528.2
Vitamin K-dependent protein C [OS=Homo sapiens];Isoform 2 of Vitamin K-dependent protein C [OS=Homo sapiens]	P04070;P04070-2	P04070;P04070-2	P04070	SUBCELLULAR LOCATION: Secreted {ECO:0000269|PubMed:25618265}. Golgi apparatus {ECO:0000269|PubMed:22531345, ECO:0000269|PubMed:25748729}. Endoplasmic reticulum {ECO:0000269|PubMed:22531345, ECO:0000269|PubMed:25748729}.	endoplasmic reticulum [GO:0005783]; endoplasmic reticulum lumen [GO:0005788]; extracellular region [GO:0005576]; extracellular space [GO:0005615]; Golgi apparatus [GO:0005794]; Golgi lumen [GO:0005796]	1				1205.82	Filtered	Filtered	6564.32	7184.8	5660.29	1830.87	Filtered	6102.76	4109.96	3302.95	2029.2	Filtered	3819.15	7623.07	5269.14	Filtered	3561.85	6623.24	4967.55	Filtered	Filtered	Filtered	3678.98	2673.68
fructose-bisphosphate aldolase A [OS=Homo sapiens]	P04075	P04075	P04075	SUBCELLULAR LOCATION: Cytoplasm, myofibril, sarcomere, I band. Cytoplasm, myofibril, sarcomere, M line. Note=In skeletal muscle, accumulates around the M line and within the I band, colocalizing with FBP2 on both sides of the Z line in the absence of Ca(2+). {ECO:0000250}.	actin cytoskeleton [GO:0015629]; cytosol [GO:0005829]; extracellular exosome [GO:0070062]; extracellular region [GO:0005576]; extracellular space [GO:0005615]; ficolin-1-rich granule lumen [GO:1904813]; I band [GO:0031674]; M band [GO:0031430]; membrane [GO:0016020]; nucleus [GO:0005634]; platelet alpha granule lumen [GO:0031093]; secretory granule lumen [GO:0034774]; sperm head [GO:0061827]; ter…	1	2	3	4	295415	279718	227749	245922	215515	442092	405157	262060	208893	222942	522206	269848	265118	321597	215995	427339	300087	268170	212311	211966	401211	428092	261019	219418	177918
Cystatin-B [OS=Homo sapiens]	P04080	P04080	P04080	SUBCELLULAR LOCATION: Cytoplasm {ECO:0000269|PubMed:11139332}. Nucleus {ECO:0000269|PubMed:11139332}.	collagen-containing extracellular matrix [GO:0062023]; cytoplasm [GO:0005737]; cytosol [GO:0005829]; extracellular exosome [GO:0070062]; extracellular region [GO:0005576]; extracellular space [GO:0005615]; ficolin-1-rich granule lumen [GO:1904813]; nucleolus [GO:0005730]; secretory granule lumen [GO:0034774]; tertiary granule lumen [GO:1904724]	1	2		4	116146	126438	76795.1	83509.4	75670.7	126480	152090	81548.4	81985.1	67015.1	136121	108344	88896.9	92282.1	62738.9	105983	105199	85530.5	71336.8	60226.3	212068	221616	127109	98181.2	83660.6
annexin A1 [OS=Homo sapiens]	P04083	P04083	P04083	SUBCELLULAR LOCATION: Nucleus {ECO:0000269|PubMed:10772777, ECO:0000269|PubMed:19625660}. Cytoplasm {ECO:0000269|PubMed:10772777, ECO:0000269|PubMed:17008549, ECO:0000269|PubMed:19625660}. Cell projection, cilium {ECO:0000250|UniProtKB:P46193}. Cell membrane {ECO:0000269|PubMed:10772777}. Membrane {ECO:0000269|PubMed:17008549, ECO:0000269|PubMed:2532504, ECO:0000269|PubMed:8557678}; Peripheral me…	apical plasma membrane [GO:0016324]; basolateral plasma membrane [GO:0016323]; cell-cell adherens junction [GO:0005913]; cell surface [GO:0009986]; collagen-containing extracellular matrix [GO:0062023]; cornified envelope [GO:0001533]; cytoplasm [GO:0005737]; cytoplasmic vesicle membrane [GO:0030659]; cytosol [GO:0005829]; early endosome membrane [GO:0031901]; endosome [GO:0005768]; extracellular…	1	2	3	4	38818.1	43428.1	45513.7	68085.9	84736.1	54259.1	99080.8	51877.5	67822.6	87916.7	49031.7	46565.7	51109.1	80307.9	76831	54115.8	67875.1	50183.4	102467	80355	125876	188052	92642.7	115012	81099.1
apolipoprotein B-100 [OS=Homo sapiens]	P04114	P04114	P04114	SUBCELLULAR LOCATION: Cytoplasm {ECO:0000269|PubMed:22580899}. Secreted {ECO:0000269|PubMed:22580899, ECO:0000269|PubMed:26224785}.	chylomicron [GO:0042627]; chylomicron remnant [GO:0034360]; clathrin-coated endocytic vesicle membrane [GO:0030669]; cytoplasm [GO:0005737]; cytosol [GO:0005829]; early endosome [GO:0005769]; endocytic vesicle lumen [GO:0071682]; endoplasmic reticulum exit site [GO:0070971]; endoplasmic reticulum lumen [GO:0005788]; endoplasmic reticulum membrane [GO:0005789]; endosome lumen [GO:0031904]; endosom…	1	2	3		19640.7	11011.9	22338.5	24432.6	26471.1	23607.8	19255.2	20959.6	21012.8	28022.1	24978.1	12870.6	20516.1	21638.9	24554.3	28754.4	17843.1	22205.4	25320.7	25782	13370.1	9275.84	16238.6	13082.6	12713.9
Superoxide dismutase [Mn], mitochondrial [OS=Homo sapiens]	P04179	P04179	P04179	SUBCELLULAR LOCATION: Mitochondrion matrix.	extracellular exosome [GO:0070062]; mitochondrial matrix [GO:0005759]; mitochondrion [GO:0005739]					463410	735326	477099	513938	483717	451704	1.11065e+06	546754	503461	435796	489892	708216	532846	687616	476338	437856	882587	578929	481018	414612	708409	1.20063e+06	649156	532456	506724
Histidine-rich glycoprotein [OS=Homo sapiens]	P04196	P04196	P04196	SUBCELLULAR LOCATION: Secreted {ECO:0000269|PubMed:21215706}.	blood microparticle [GO:0072562]; cell surface [GO:0009986]; collagen-containing extracellular matrix [GO:0062023]; endolysosome [GO:0036019]; extracellular exosome [GO:0070062]; extracellular region [GO:0005576]; plasma membrane [GO:0005886]; platelet alpha granule lumen [GO:0031093]			3		37564.1	31701.3	29776.2	52998.9	60895.6	66016.7	72141.5	25536.9	56843.5	49445.9	77127.3	30307.5	30959.6	55555	57633.3	59913.6	35026.5	21541.4	60305.7	47168.3	8897.76	9915.81	6906.13	16303.1	12125.7
Thy-1 membrane glycoprotein [OS=Homo sapiens]	P04216	P04216	P04216	SUBCELLULAR LOCATION: Cell membrane {ECO:0000250}; Lipid-anchor, GPI-anchor {ECO:0000250}.	anchored component of external side of plasma membrane [GO:0031362]; apical plasma membrane [GO:0016324]; axolemma [GO:0030673]; cell surface [GO:0009986]; cytosol [GO:0005829]; dendrite [GO:0030425]; dendrite membrane [GO:0032590]; endoplasmic reticulum [GO:0005783]; external side of plasma membrane [GO:0009897]; extracellular exosome [GO:0070062]; extracellular region [GO:0005576]; focal adhesi…		2	3		24141.6	12623.5	25549.8	2967.29	Filtered	Filtered	39383.9	24315.4	Filtered	5711.52	32979.8	16321.4	23648.8	21158.2	Filtered	23684.6	15129.8	11053.1	Filtered	Filtered	113409	150014	19417.8	18621.6	23169.9
Alpha-1B-glycoprotein [OS=Homo sapiens]	P04217	P04217	P04217	SUBCELLULAR LOCATION: Secreted.	blood microparticle [GO:0072562]; collagen-containing extracellular matrix [GO:0062023]; extracellular exosome [GO:0070062]; extracellular region [GO:0005576]; extracellular space [GO:0005615]; ficolin-1-rich granule lumen [GO:1904813]; platelet alpha granule lumen [GO:0031093]; secretory granule lumen [GO:0034774]	1				35238.3	29430.8	27050	20839.4	21295.3	33921.9	34166.9	22521.4	19146.1	19914.2	44367	21675.4	20890.7	23200.5	19912.9	22713.4	28628	21599.1	19635.4	20588.1	22606.3	30855.6	17869.8	16075.5	15496.9
[truncated: 3,090 more rows]

## Sheet: extracellular
PG.ProteinDescriptions	PG.ProteinGroups	PG.UniProtIds	PG.UniProtIds	Subcellular location [CC]	Gene ontology (cellular component)	Extracellular space	Cytoplasm	Membrane	Nucleus	2101_XPM	2101C_XUM	2101F_FPS	2101SB_DPS	2101SC_DUS	2102_XPM	2102C_XUM	2102F_FPS	2102SB_DPS	2102SC_DUS	2103_XPM	2103C_XUM	2103F_FPS	2103SB_DPS	2103SC_DUS	2106_XPM	2106C_XUM	2106F_FPS	2106SB_DPS	2106SC_DUS	2114_XPM	2114C_XUM	2114F_FPS	2114SB_DPS	2114SC_DUS
[truncated: 368 more rows]

[truncated: 4 more sheets: cytoplasm_cytosol, membrane, nucleus_nucleolus_nuclear, summary]
